# Supplementary material for: Enantioselective organocatalytic sequential Michael-cyclization of functionalized nitroalkanes to 2-hydroxycinnamaldehydes: synthesis of benzofused dioxa[3.3.1] and oxa[4.3.1] methylene-bridged compounds
Source: Royal Society of Chemistry journal article supplement (doi:10.1039/d1qo00501d), 2021-01-01
Supplement: d1qo00501d1.pdf [file d1qo00501d1.pdf]

**Enantioselective organocatalytic sequential Michael-cyclization of  
functionalized nitroalkanes to 2-hydroxycinnamaldehydes: Synthesis  
of benzofused dioxo[3.3.1] and oxa[4.3.1] methylene-bridged  
compounds**

Chen-Jun Peng,<sup>a</sup> Jun-Ping Pei,<sup>a</sup> Ying-Han Chen,<sup>a</sup> Zhi-Yong Wu,<sup>a</sup> Ming Liu<sup>a,b</sup> and  
Yan-Kai Liu<sup>\*a,b</sup>

<sup>a</sup>Key Laboratory of Marine Drugs, Chinese Ministry of Education, School of Medicine and Pharmacy, Ocean  
University of China, Qingdao 266003, China.

<sup>b</sup>Laboratory for Marine Drugs and Bioproducts of Qingdao National Laboratory for Marine Science and  
Technology, Qingdao 266003, China.

Email: [liuyankai@ouc.edu.cn](mailto:liuyankai@ouc.edu.cn) (Y.-K. Liu)

**Supporting Information**

## Contents

|                                                                                    |           |
|------------------------------------------------------------------------------------|-----------|
| <b>A. General information</b> .....                                                | <b>4</b>  |
| <b>B. Preparation of substrates</b> .....                                          | <b>6</b>  |
| B1. Preparation of 3'' .....                                                       | 6         |
| B2. Preparation of 2-nitro-3-phenylpropan-1-ol 2s.....                             | 7         |
| B3. Preparation of 2-nitropropane-1,3-diol 2u .....                                | 8         |
| B4. Preparation of ethyl 2-hydroxy-3-nitropropanoate 6.....                        | 8         |
| B5. Preparation of (2-nitroethyl)(phenyl)sulfane 14 .....                          | 8         |
| B6. Preparation of 5-bromo-2-(2-nitroethyl)-1H-indole 17 .....                     | 9         |
| B7. Preparation of 1-methyl-3-(2-nitroethyl)-1H-indole 18.....                     | 10        |
| <b>C. Optimization of the reaction conditions</b> .....                            | <b>11</b> |
| C1. Optimization of the Michael Addition .....                                     | 11        |
| C2. Optimization of the one-pot reaction .....                                     | 14        |
| <b>D. Scope of the reaction 1</b> .....                                            | <b>15</b> |
| <b>E. Scope of the reaction 2</b> .....                                            | <b>33</b> |
| <b>F. Other reactions</b> .....                                                    | <b>37</b> |
| F1. Synthesis of 13 .....                                                          | 37        |
| F2. Synthesis of 16 .....                                                          | 40        |
| F3. Synthesis of 19 .....                                                          | 42        |
| F4. Synthesis of 20 .....                                                          | 44        |
| <b>G. Synthetic transformation</b> .....                                           | <b>46</b> |
| <b>H. Scale-up synthesis of 5d</b> .....                                           | <b>54</b> |
| <b>I. NMR analysis and computational studies for the reaction pathway</b><br>..... | <b>55</b> |

**J. NMR spectra and HPLC analyses .....64**

**K. Single crystal X-Ray diffraction data .....161**

## A. General information

The  $^1\text{H}$  and  $^{13}\text{C}$  NMR spectra were recorded at 500 MHz for  $^1\text{H}$  and at 125 MHz for  $^{13}\text{C}$ . The chemical shifts ( $\delta$ ) for  $^1\text{H}$  and  $^{13}\text{C}$  are given in ppm relative to residual signals of the solvents ( $\text{CDCl}_3$  at 7.26 ppm  $^1\text{H}$  NMR, 77.16 ppm  $^{13}\text{C}$  NMR. *d6*-DMSO at 2.50 ppm  $^1\text{H}$  NMR, 39.52 ppm  $^{13}\text{C}$  NMR). Coupling constants are given in Hz. The following abbreviations are used to indicate the multiplicity: s, singlet; d, doublet; t, triplet; q, quartet; m, multiplet. High-resolution mass spectra (HRMS) were obtained from the Waters Q-ToF Ultima Global. X-ray data was obtained from Zhongke chemical technology service center. Optical rotations are reported as follows:  $[\alpha]_{\text{D}}^{20}$  (c in g per 100 mL, solvent:  $\text{CHCl}_3$ , MeOH).

Note: NMR signals containing common solvent contaminants were list.  $\text{H}_2\text{O}$  in  $\text{CDCl}_3$  at 1.56 ppm  $^1\text{H}$  NMR, and in *d6*-DMSO at 3.33 ppm  $^1\text{H}$  NMR; Ethyl acetate in  $\text{CDCl}_3$  at 2.05 (s), 4.12 (q), 1.26 (t) ppm  $^1\text{H}$  NMR; Dichloromethane in  $\text{CDCl}_3$  at 5.30 (s) ppm  $^1\text{H}$  NMR.

All the reactions were set up under air and using freshly distilled solvents, without any precautions to exclude moisture, unless otherwise noted open air chemistry on the bench-top. Chromatographic purification of products was accomplished using force-flow chromatography (FC) on silica gel (300-400 mesh). For thin layer chromatography (TLC) analysis throughout this work, Merck pre-coated TLC plates (silica gel 60 GF254, 0.25 mm) were used, using UV light as the visualizing agent and an phosphomolybdic acid or basic aqueous potassium permanganate ( $\text{KMnO}_4$ ) as stain developing solutions. Organic solutions were concentrated under reduced pressure on a Büchi rotary evaporator.

HPLC analyses on chiral stationary phase were performed on an Hitachi Chromaste. Daicel Chiralpak IA, IB, IC, or chiral-N(s)(2) columns with *n*-hexane/*i*-PrOH as the eluent were used. HPLC traces were compared to racemic samples which prepared by mixture of two enantiomeric final products obtained using (*S*) and (*R*) catalyst.

Commercial reagents and solvents were purchased from Sigma Aldrich, Fluka, and Alfa Aesar used as received, without further purification. The 2-hydroxycinnamaldehydes **1** were prepared according to the literature procedures.<sup>[1]</sup> All 1-nitromethylcycloalcohols were prepared from cyclic ketones according to the literature procedures.<sup>[2]</sup> 2-nitroethanol **2f** and 2-nitropropan-1-ol **2u** were purchased.

[1] Sun X-L; Chen Y-H; Zhu D-Y; Zhang Y; Liu Y-K. *Org. Lett.* **2016**, *18*, 864.

[2] Mo-Hui Wei, Yi-Rong Zhou, Liang-Hu Gu, Fan Luo, Fang-Lin Zhang. *Tetrahedron Letters.* **2013**, *54*, 2546.

## B. Preparation of substrates

### B1. Preparation of **3''**

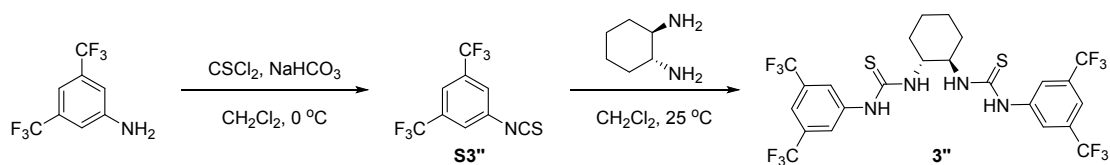

To a solution of 3,5-bis(trifluoromethyl)aniline (3 mL, 20 mmol, 1.0 equiv.) and saturated sodium bicarbonate solution (40 mL) in CH<sub>2</sub>Cl<sub>2</sub> (40 mL) was added thiophosgene CSCl<sub>2</sub> (1.7 mL, 22 mmol, 1.1 equiv.) very slowly at 0 °C. The reaction was stirred at 0 °C for about 2 h (monitored by TLC). The reaction mixture was extracted three times with CH<sub>2</sub>Cl<sub>2</sub> and the combined organic layers were washed with saturated sodium chloride solution. The organic layer was dried with anhydrous Na<sub>2</sub>SO<sub>4</sub> and the solvent was evaporated. The product was purified by column chromatography on a silica gel (petroleum ether) to afford the desired product **S3''** as a yellow oil (2.4 g).

To a solution of **S3''** (2.4 g, 8.9 mmol, 2.5 equiv.) in CH<sub>2</sub>Cl<sub>2</sub> (5 mL) was added (1*R*,2*R*)-cyclohexane-1,2-diamine (405 mg, 3.5 mmol, 1.0 equiv.) at 25 °C. The reaction was stirred at 25 °C for about 12 h until the consumption of (1*R*,2*R*)-cyclohexane-1,2-diamine (monitored by TLC). Then the reaction mixture was concentrated and the residue was purified by flash chromatography on silica gel (petroleum ether/ethyl acetate = 5/1) to give product **3''** (1.2 g, 23% yield over two steps).

## B2. Preparation of 2-nitro-3-phenylpropan-1-ol **2s**

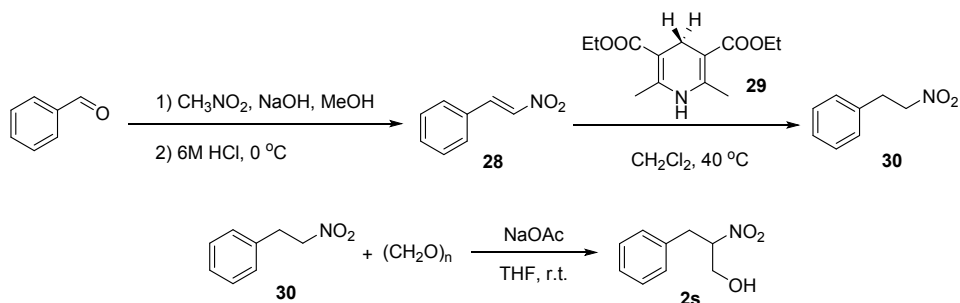

To a solution of benzaldehyde (1.8 mL, 18 mmol, 1.0 equiv.) and nitromethane (1.1 mL, 20 mmol, 1.1 equiv.) in MeOH (5 mL) was added NaOH (1.1 g, 27 mmol, 1.5 equiv.) in MeOH (5 mL) at 0 °C. The reaction was stirred at 0 °C for 2 h until the consumption of benzaldehyde (monitored by TLC). After that, pour the reaction mixture into 6M HCl solution at 0 °C and white precipitation started to form. **28** (1.6 g, 60% yield) could be afforded as a yellow solid by recrystallization with EtOH. To a solution of **28** (298 mg, 2 mmol, 1.0 equiv.) in  $\text{CH}_2\text{Cl}_2$  (3 mL) was added **29** (608 mg, 2.4 mmol, 1.2 equiv.) and the reaction was refluxed at 40 °C for 48 h. The solvent was evaporated and the product was purified by column chromatography on a silica gel (petroleum ether/ethyl acetate = 80/1) to afford the desired product **30** as a yellow oil (272 mg, 90% yield).

To a solution of **30** (272 mg, 1.8 mmol, 1.0 equiv.) in THF (3 mL) was added NaOAc (44 mg, 0.54 mmol, 0.3 equiv.) and paraformaldehyde (49 mg, 1.6 mmol, 0.9 equiv.) at room temperature. The reaction was stirred at room temperature until completion of the reaction. The reaction mixture was extracted three times with ethyl acetate and the combined organic layers were washed with saturated sodium chloride solution. The organic layer was dried with anhydrous  $\text{Na}_2\text{SO}_4$  and then the solvent was evaporated. The product was purified by column chromatography on a silica gel (petroleum ether/ethyl acetate = 5/1) to afford the desired product **2s** as a white solid (222 mg, 68% yield).

### B3. Preparation of 2-nitropropane-1,3-diol **2u**

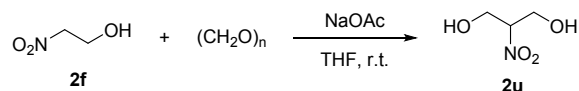

To a solution of 2-nitroethanol (0.43 mL, 6 mmol, 1.0 equiv.) in THF (10 mL) was added NaOAc (148 mg, 1.8 mmol, 0.3 equiv.) and paraformaldehyde (180 mg, 6 mmol, 1.0 equiv.) at room temperature. The reaction was stirred at room temperature until completion of the reaction. The reaction mixture was extracted three times with ethyl acetate and the combined organic layers were washed with saturated sodium chloride solution. The organic layer was dried with anhydrous  $\text{Na}_2\text{SO}_4$  and then the solvent was evaporated. The product was purified by column chromatography on a silica gel (petroleum ether/ethyl acetate = 1.5/1) to afford the desired product **2u** as a yellow oil (300 mg, 41% yield).

### B4. Preparation of ethyl 2-hydroxy-3-nitropropanoate **6**

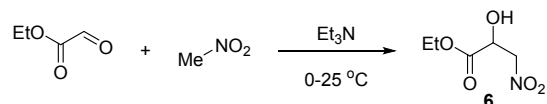

To a solution of ethyl 2-oxoacetate (1 mL, 5 mmol, 1.0 equiv.) in nitromethane (10 mL) was added  $\text{Et}_3\text{N}$  (0.35 mL, 2.5 mmol, 0.5 equiv.) at 0 °C. The reaction was stirred at 25 °C until completion of the reaction. Then the solvent nitromethane was evaporated. The residue was purified by column chromatography on a silica gel (petroleum ether/ethyl acetate = 4/1) to afford the desired product **6** as a white solid (643 mg, 79% yield).

### B5. Preparation of (2-nitroethyl)(phenyl)sulfane **14**

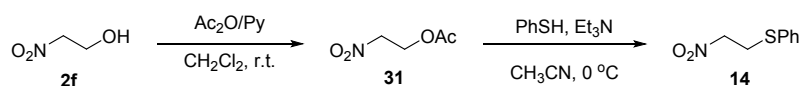

To a solution of 2-nitroethanol (0.36 mL, 5 mmol, 1.0 equiv.) and acetic anhydride (0.52 mL, 5.5 mmol, 1.1 equiv.) in  $\text{CH}_2\text{Cl}_2$  (8 mL) was added pyridine (0.45 mL, 5.5



mmol, 1.1 equiv.). The reaction was stirred under nitrogen atmosphere at room temperature. After 7 h, the reaction mixture was poured into 1M HCl and the aqueous phase was extracted with dichloromethane. The combined organic layers were washed with 1M HCl for three times. The organic layer was washed with saturated sodium chloride solution and was dried with anhydrous Na<sub>2</sub>SO<sub>4</sub> and then the solvent was evaporated. The product was purified by column chromatography on a silica gel (petroleum ether/ethyl acetate = 5/1) to afford the desired product **31** as a colorless oil (542 mg, 81% yield).

To a solution of **31** (542 mg, 4 mmol, 1.0 equiv.) and thiophenol (0.42 mL, 4 mmol, 1.0 equiv.) in acetonitrile (6 mL) was added Et<sub>3</sub>N (0.57 mL, 4 mmol, 1.0 equiv.) at 0 °C. The reaction was stirred at 0 °C for 30min. The reaction mixture was poured into 1M HCl at 0 °C and the aqueous phase was extracted with ethyl acetate. The combined organic layers were washed with 1M HCl for three times. The organic layer was washed with saturated sodium chloride solution and was dried with anhydrous Na<sub>2</sub>SO<sub>4</sub> and then the solvent was evaporated. The product was purified by column chromatography on a silica gel (petroleum ether/ethyl acetate = 100/1-30/1) to afford the desired product **14** as a colorless oil (608 mg, 82% yield).

#### B6. Preparation of 5-bromo-2-(2-nitroethyl)-1H-indole **17**

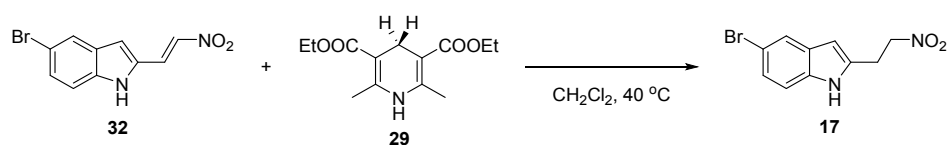

The synthetic method of **32** is the same as that of **34**.

To a solution of **32** (200 mg, 0.75 mmol, 1.0 equiv.) in CH<sub>2</sub>Cl<sub>2</sub> (3 mL) was added **29** (190 mg, 0.75 mmol, 1.0 equiv.) and the reaction was refluxed at 40 °C for 6 days. The solvent was evaporated and the product was purified by column chromatography on a silica gel (petroleum ether/ethyl acetate = 6/1-4/1) to afford the desired product **17** as a red oil (141.4 mg, 70% yield).

## B7. Preparation of 1-methyl-3-(2-nitroethyl)-1H-indole **18**

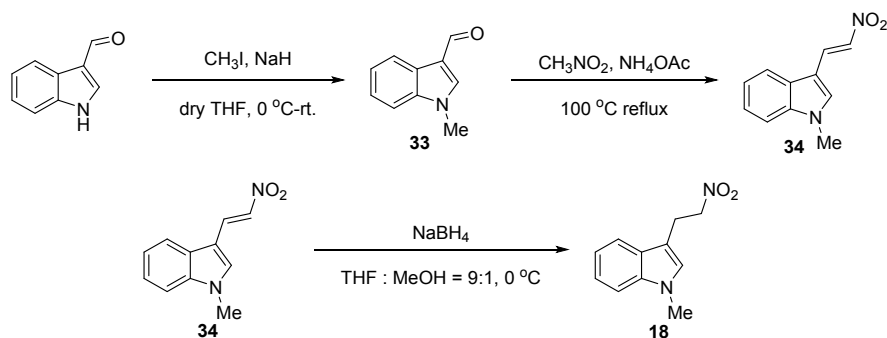

To a solution of sodium hydride (560 mg, 14 mmol, 2.0 equiv.) in dry THF (10 mL) was added indole-3-carboxaldehyde (1 g, 7 mmol, 1.0 equiv.) at  $0\text{ }^\circ\text{C}$  in nitrogen atmosphere. The reaction was stirred at room temperature for 1 h and iodomethane (872  $\mu\text{L}$ , 14 mmol, 2.0 equiv.) was added to the reaction. The reaction was stirred at room temperature until completion of the reaction. The mixture was quenched with sat.  $\text{NH}_4\text{Cl}$  and extracted with ethyl acetate. The combined organic layers were dried over anhydrous  $\text{Na}_2\text{SO}_4$  and the solvent was evaporated. The product was purified by column chromatography on a silica gel (petroleum ether/ethyl acetate = 2/1) to afford the desired product **33**. To a solution of **33** (1.14g, 7 mmol, 1.0 equiv.) in nitromethane (8 mL) was added ammonium acetate (270 mg, 3.5 mmol, 0.5 equiv.) and the reaction was refluxed at  $100\text{ }^\circ\text{C}$  for 1 h. The reaction mixture was recrystallized with ethanol and the desired product **34** was obtained as a yellow solid (1.3g, 93% yield for 2 steps).

To a solution of **34** (300 mg, 1.5 mmol, 1.0 equiv.) in mixed solvent ( $\text{THF}/\text{MeOH} = 9/1$ , 3 mL) was added sodium borohydride (84 mg, 2.2 mmol, 1.5 equiv.) at  $0\text{ }^\circ\text{C}$  and the reaction was stirred at room temperature overnight. The mixture was quenched with sat.  $\text{NH}_4\text{Cl}$  and extracted with ethyl acetate. The combined organic layers were dried over anhydrous  $\text{Na}_2\text{SO}_4$  and the solvent was evaporated. The product was purified by column chromatography on a silica gel (petroleum ether/ethyl acetate = 15/1) to afford the desired product **18** as a yellow oil (134.4 mg, 44% yield).

## C. Optimization of the reaction conditions

### C1. Optimization of the Michael Addition

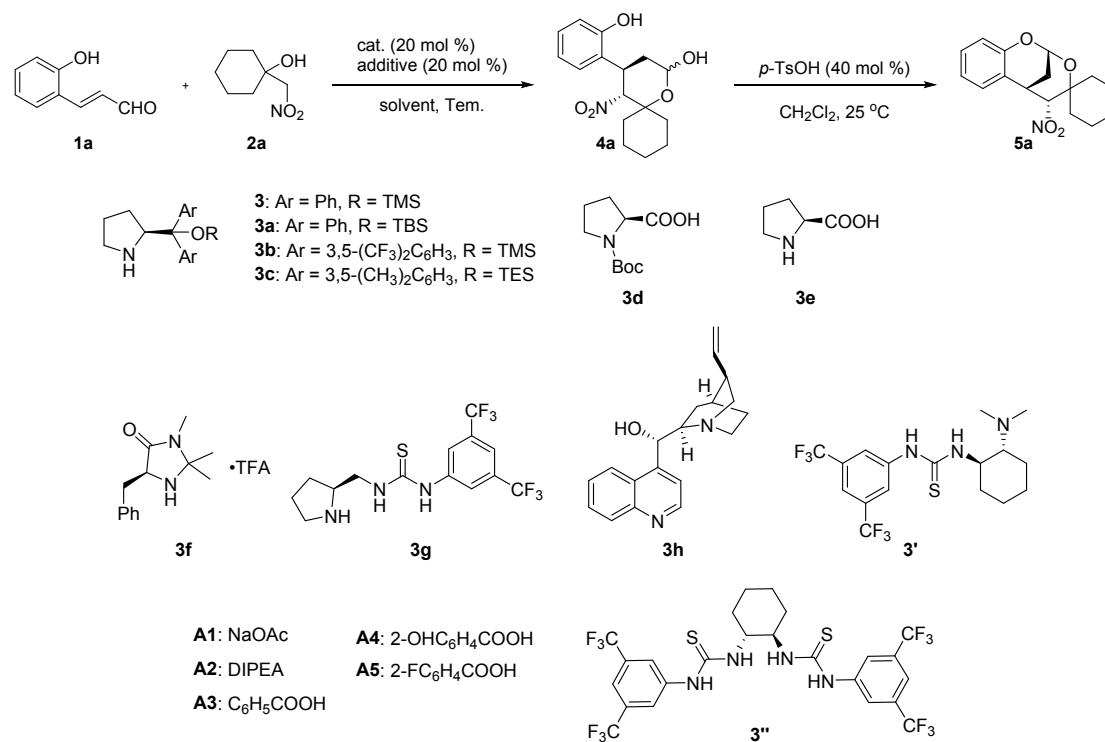

**Table S1.** Optimization of the Michael Addition<sup>a</sup>

| Entry | Cat.      | additive | Solvent           | Tem<br>(°C) | t(d) <sup>b</sup> | Yield<br>(%) <sup>c</sup> | ee<br>(%) <sup>d</sup> | dr <sup>e</sup> |
|-------|-----------|----------|-------------------|-------------|-------------------|---------------------------|------------------------|-----------------|
| 1     | <b>3</b>  | /        | CHCl <sub>3</sub> | 25          | 1                 | 55                        | 71                     | >20:1           |
| 2     | <b>3</b>  | /        | CHCl <sub>3</sub> | 0           | 3                 | 69                        | 87                     | >20:1           |
| 3     | <b>3a</b> | /        | CHCl <sub>3</sub> | 0           | 3                 | 66                        | 87                     | >20:1           |
| 4     | <b>3b</b> | /        | CHCl <sub>3</sub> | 0-60        | 3                 | trace                     | 5                      | >20:1           |
| 5     | <b>3c</b> | /        | CHCl <sub>3</sub> | 0           | 3                 | trace                     | 87                     | >20:1           |
| 6     | <b>3d</b> | /        | CHCl <sub>3</sub> | 0           | 3                 | /                         | /                      | /               |

|    |              |   |                                 |      |   |       |    |       |
|----|--------------|---|---------------------------------|------|---|-------|----|-------|
| 7  | <b>3e</b>    | / | CHCl <sub>3</sub>               | 0    | 3 | /     | /  | /     |
| 8  | <b>3f</b>    | / | CHCl <sub>3</sub>               | 0-40 | 3 | /     | /  | /     |
| 9  | <b>3g</b>    | / | CHCl <sub>3</sub>               | 0-40 | 3 | /     | /  | /     |
| 10 | <b>3'</b>    | / | CHCl <sub>3</sub>               | 0    | 3 | /     | /  | /     |
| 11 | <b>3+3h</b>  | / | CHCl <sub>3</sub>               | 0    | 3 | 51    | 86 | >20:1 |
| 12 | <b>3+3'</b>  | / | CHCl <sub>3</sub>               | 0    | 3 | trace | 87 | >20:1 |
| 13 | <b>3'+3e</b> | / | CHCl <sub>3</sub>               | 0    | 3 | 44    | 18 | >20:1 |
| 14 | <b>3</b>     | / | toluene                         | 0    | 3 | 54    | 83 | >20:1 |
| 15 | <b>3</b>     | / | CH <sub>2</sub> Cl <sub>2</sub> | 0    | 3 | trace | 84 | >20:1 |
| 16 | <b>3</b>     | / | DCE                             | 0    | 3 | 42    | 83 | >20:1 |
| 17 | <b>3</b>     | / | TCE                             | 0    | 3 | trace | 83 | >20:1 |
| 18 | <b>3</b>     | / | Benzotrifluoride                | 0    | 3 | 39    | 76 | >20:1 |
| 19 | <b>3</b>     | / | Bromobenzene                    | 0    | 3 | 53    | 79 | >20:1 |
| 20 | <b>3</b>     | / | MTBE                            | 0    | 3 | 44    | 82 | >20:1 |
| 21 | <b>3</b>     | / | CH <sub>3</sub> CN              | 0    | 3 | 57    | 76 | >20:1 |
| 22 | <b>3</b>     | / | Et <sub>2</sub> O               | 0    | 3 | 57    | 80 | >20:1 |
| 23 | <b>3</b>     | / | THF                             | 0    | 3 | 14    | 79 | >20:1 |
| 24 | <b>3</b>     | / | EA                              | 0    | 3 | 44    | 77 | >20:1 |
| 25 | <b>3</b>     | / | Acetone                         | 0    | 3 | 29    | 76 | >20:1 |

|    |   |     |                   |   |   |       |    |       |
|----|---|-----|-------------------|---|---|-------|----|-------|
| 26 | 3 | A1  | CHCl <sub>3</sub> | 0 | 3 | trace | 86 | >20:1 |
| 27 | 3 | A2  | CHCl <sub>3</sub> | 0 | 3 | 53    | 84 | >20:1 |
| 28 | 3 | A3  | CHCl <sub>3</sub> | 0 | 3 | trace | 87 | >20:1 |
| 29 | 3 | A4  | CHCl <sub>3</sub> | 0 | 3 | /     | /  | /     |
| 30 | 3 | A5  | CHCl <sub>3</sub> | 0 | 3 | 32    | 86 | >20:1 |
| 31 | 3 | 3'' | CHCl <sub>3</sub> | 0 | 3 | 71    | 91 | >20:1 |

[a] Unless otherwise specified, all reactions were carried out using **2a** (0.05 mmol, 1.0 equiv.), **1a** (0.06 mmol, 1.2 equiv.) in solvent (0.2 mL) with **cat.** (20 mol %) and additive (20 mol %) at 0 °C. After workup, the mixture was purified by flash chromatography on silica gel to afford **4a**. Compound **4a** was dissolved in redistilled CH<sub>2</sub>Cl<sub>2</sub> (0.05 mmol in 0.3 mL) at 25 °C. *p*-TsOH (40 mol %) was added. After full conversion of the second step, the residue was purified by flash chromatography on gel to give product **5a**. [b] For the first step. [c] Isolated yield of **5a** over two steps. [d] Determined by HPLC analyses of isolated compound **5a** on chiral stationary phases. [e] Determined by <sup>1</sup>H NMR.

TMS = trimethylsilyl

DCE = 1,2-dichloroethane

TBS = (1,1-Dimethylethyl)dimethylsilyl

TCE = 1,1,2,2-tetrachloroethane

TES = triethylsilyl

MTBE = tert-Butyl methyl ether

DIPEA = N,N-Diisopropylethylamine

THF = tetrahydrofuran

*p*-TsOH = *p*-Toluenesulfonic acid.

EA = ethyl acetate

## C2. Optimization of the one-pot reaction

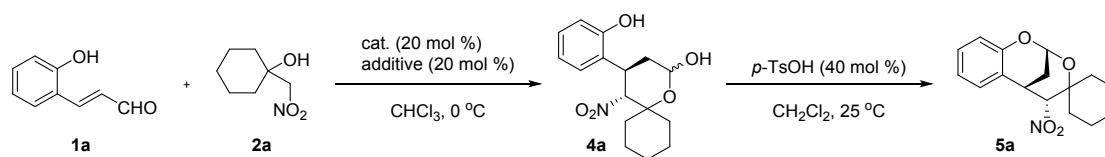

**Table S2.** Optimization of the one-pot reaction<sup>a</sup>

| Entry | Cat.      | additive   | t(d) <sup>b</sup> | Yield (%) <sup>c</sup> | ee (%) <sup>d</sup> | dr <sup>e</sup> |
|-------|-----------|------------|-------------------|------------------------|---------------------|-----------------|
| 1     | <b>3</b>  | /          | 3.5               | 73                     | 79                  | >20:1           |
| 2     | <b>3a</b> | /          | 3.5               | 69                     | 81                  | >20:1           |
| 3     | <b>3</b>  | <b>3''</b> | 3.5               | 66                     | 79                  | >20:1           |

[a] Unless otherwise specified, all reactions were carried out using **2a** (0.05 mmol, 1.0 equiv.), **1a** (0.06 mmol, 1.2 equiv.) in CHCl<sub>3</sub> (0.2 mL) with **3** (20 mol %) and additive (20 mol %) at 0 °C for 3 days. Then *p*-TsOH (40 mol %) was added to the reaction mixture at 25 °C. After workup, the mixture was purified by flash chromatography on silica gel to afford **5a**. [b] For the two steps. [c] Isolated yield of **5a** over two steps. [d] Determined by HPLC analyses of isolated compound **5a** on chiral stationary phases. [e] Determined by <sup>1</sup>H NMR.

TMS = trimethylsilyl

*p*-TsOH = *p*-Toluenesulfonic acid.

TBS = (1,1-Dimethylethyl)dimethylsilyl

## D. Scope of the reaction 1

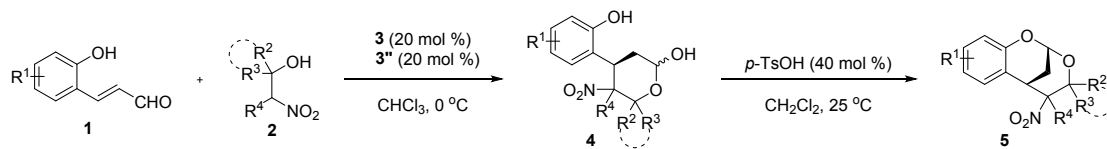

**Table S3.** Substrates correspond to the products

| <b>1</b> | <b>2</b> | <b>5</b> |
|----------|----------|----------|
|          |          |          |
|          |          |          |
|          |          |          |
|          |          |          |
|          |          |          |
|          |          |          |
|          |          |          |
|          |          |          |

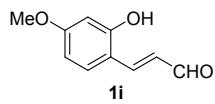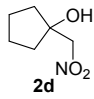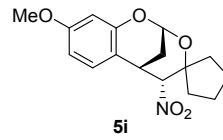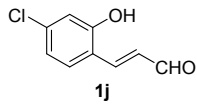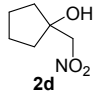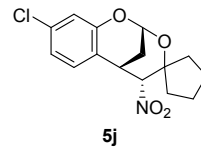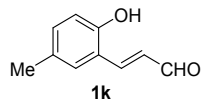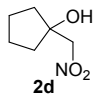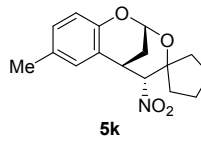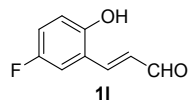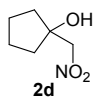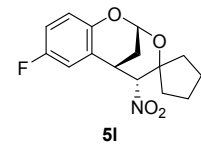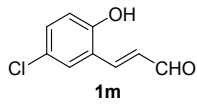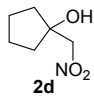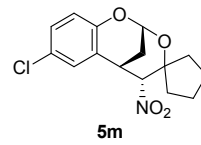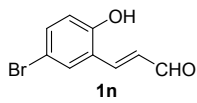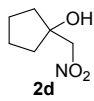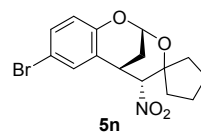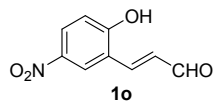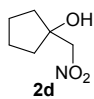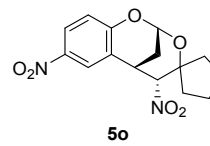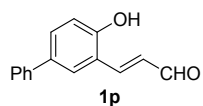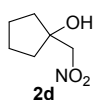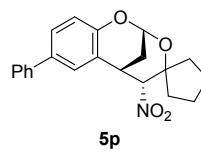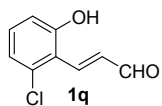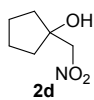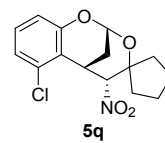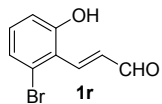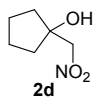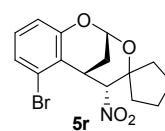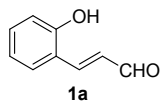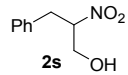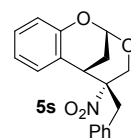



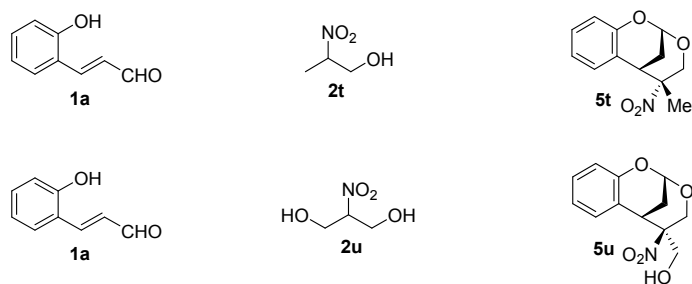

**General procedure:** A glass vial equipped with a magnetic stirring bar was charged with 1-nitromethylcycloalcohols **2** (0.20 mmol, 1.0 equiv.), different substituted 2-hydroxycinnamaldehydes **1** (0.24 mmol, 1.2 equiv.), **3** (0.04 mmol, 0.2 equiv.) and **3''** (0.04 mmol, 0.2 equiv.) in  $\text{CHCl}_3$  (0.5 mL) at 0 °C. The resulting reaction mixture was kept under vigorous stirring until the consumption of **2** (monitored by TLC analysis). After completion of the reaction, the residue was purified by flash chromatography on silica gel (petroleum ether/ethyl acetate = 5/1 to 1.5/1) to afford **4** as intermediate. Then, compound **4** (1.0 equiv.) was respectively dissolved in anhydrous  $\text{CH}_2\text{Cl}_2$  (0.10 mmol in 0.5 mL) at 25 °C and *p*-TsOH (0.4 equiv.) was added to the reaction mixture. After full conversion of the second step, the residue was purified by flash chromatography on silica gel (petroleum ether/ethyl acetate = 100/1 to 4/1) to give product **5** for NMR and HPLC analysis.

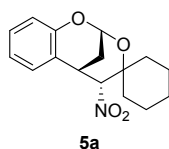

**5a** was obtained as a white solid 40.8 mg in 71% yield for two steps after column chromatography on silica gel (petroleum ether/ethyl acetate = 60/1). **<sup>1</sup>H NMR** (500 MHz, CDCl<sub>3</sub>)  $\delta$  7.26 (dd,  $J = 7.6, 2.5$  Hz, 2H), 6.93 (t,  $J = 7.5$  Hz, 1H), 6.82 (d,  $J = 8.1$  Hz, 1H), 5.74 (s, 1H), 4.72 (d,  $J = 3.6$  Hz, 1H), 3.63 (d,  $J = 2.9$  Hz, 1H), 2.17 (dt,  $J = 13.2, 2.3$  Hz, 1H), 2.04 – 1.91 (m, 2H), 1.86 – 1.59 (m, 5H), 1.56– 1.47 (m, 2H), 1.36 – 1.28 (m, 1H), 1.03 (qt,  $J = 13.2, 4.0$  Hz, 1H), 0.82 (td,  $J = 13.6, 3.6$  Hz, 1H) ppm. **<sup>13</sup>C NMR** (125 MHz, CDCl<sub>3</sub>)  $\delta$  153.5, 131.7, 129.7, 121.9, 120.5, 115.7, 93.6, 91.4, 75.2, 40.0, 31.5, 30.7, 30.6, 25.4, 21.6, 21.4 ppm. **HRMS**: [M-H]<sup>-</sup> *calcd.* For C<sub>16</sub>H<sub>18</sub>NO<sub>4</sub><sup>-</sup> 288.1241, found 288.1237. **[ $\alpha$ ]<sub>D</sub><sup>20</sup>** 40.28 ( $c = 2.08$  in CHCl<sub>3</sub>). The enantiomeric excess was determined by HPLC analysis on Daicel Chiralpak IB column [*n*-hexane/*i*-PrOH = 90/10, 1 mL/min],  $\lambda = 210$  nm,  $t_{major} = 8.03$  min,  $t_{minor} = 7.35$  min, **ee = 91%**. The enantiomeric excess after recrystallization was determined by HPLC analysis on Daicel Chiralpak IB column [*n*-hexane/*i*-PrOH = 90/10, 1 mL/min],  $\lambda = 210$  nm,  $t_{major} = 6.91$  min,  $t_{minor} = 6.33$  min, **ee = 97%**. The diastereomeric ratio was determined by <sup>1</sup>H NMR, **dr >20:1**.

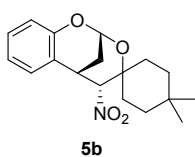

**5b** was obtained as a white solid 40.2 mg in 63% yield for two steps after column chromatography on silica gel (petroleum ether/ethyl acetate = 60/1). **<sup>1</sup>H NMR** (500 MHz, CDCl<sub>3</sub>)  $\delta$  7.27 (dd,  $J = 26.1, 7.8$  Hz, 2H), 6.93 (t,  $J = 7.5$  Hz, 1H), 6.81 (d,  $J = 8.1$  Hz, 1H), 5.72 (s, 1H), 4.72 (d,  $J = 3.4$  Hz, 1H), 3.68 (s, 1H), 2.26 – 2.12 (m, 2H), 2.05 – 1.98 (m, 1H), 1.80 – 1.63 (m, 2H), 1.50 (dd,  $J = 13.5, 3.0$  Hz, 1H), 1.34 (dd,  $J = 14.3, 3.1$  Hz, 1H), 1.17 (dd,  $J = 13.1, 1.7$  Hz, 1H), 1.06 (td,  $J = 14.0, 3.5$  Hz, 1H), 0.98 (dd,  $J = 13.2, 2.6$  Hz, 1H), 0.89 (s, 3H), 0.76 (s, 3H) ppm. **<sup>13</sup>C NMR** (125 MHz, CDCl<sub>3</sub>)  $\delta$  153.4, 131.6, 129.5, 121.7, 120.4, 115.5, 92.9, 91.2, 75.0, 36.1, 34.1, 34.0,

32.4, 31.3, 30.4, 29.3, 26.1, 23.8 ppm. **HRMS**:  $[M-H]^-$  *calcd.* For  $C_{18}H_{22}NO_4^-$  316.1554, found 316.1548.  $[\alpha]_D^{20}$  45.66 ( $c = 1.46$  in  $CHCl_3$ ). The enantiomeric excess was determined by HPLC analysis on Daicel Chiralpak IB column [*n*-hexane/*i*-PrOH = 90/10, 1 mL/min],  $\lambda = 210$  nm,  $t_{major} = 6.24$  min,  $t_{minor} = 5.71$  min, **ee = 88%**. The diastereomeric ratio was determined by  $^1H$  NMR, **dr >20:1**.

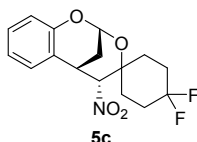

**5c** was obtained as a colorless oil 46 mg in 71% yield for two steps after column chromatography on silica gel (petroleum ether/ethyl acetate = 8/1).  **$^1H$  NMR** (500 MHz,  $CDCl_3$ )  $\delta$  7.28 (d,  $J = 7.5$  Hz, 2H), 6.96 (t,  $J = 7.4$  Hz, 1H), 6.83 (d,  $J = 8.5$  Hz, 1H), 5.74 (s, 1H), 4.80 (d,  $J = 3.5$  Hz, 1H), 3.74 (s, 1H), 2.37 – 2.14 (m, 4H), 2.05 (ddd,  $J = 13.3, 3.8, 1.9$  Hz, 1H), 1.96 (t,  $J = 11.4$  Hz, 1H), 1.76 (dd,  $J = 7.7, 2.4$  Hz, 2H), 1.61 – 1.54 (m, 1H), 1.29 – 1.23 (m, 1H) ppm.  **$^{13}C$  NMR** (125 MHz,  $CDCl_3$ )  $\delta$  153.2, 131.6, 129.9, 121.1, 120.8, 115.6, 91.3, 91.2, 73.3, 36.7, 36.6, 31.2, 30.3, 29.5, 29.3, 29.1, 26.6, 26.5 ppm. **HRMS**:  $[M-H]^-$  *calcd.* For  $C_{16}H_{16}F_2NO_4^-$  324.1053, found 324.1056.  $[\alpha]_D^{20}$  29.79 ( $c = 1.65$  in  $CHCl_3$ ). The enantiomeric excess was determined by HPLC analysis on Daicel Chiralpak IA column [*n*-hexane/*i*-PrOH = 90/10, 1 mL/min],  $\lambda = 210$  nm,  $t_{major} = 8.57$  min,  $t_{minor} = 7.88$  min, **ee = 85%**. The diastereomeric ratio was determined by  $^1H$  NMR, **dr >20:1**.

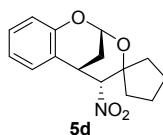

**5d** was obtained as a white solid 47.4 mg in 86% yield for two steps after column chromatography on silica gel (petroleum ether/ethyl acetate = 50/1).  **$^1H$  NMR** (500 MHz,  $CDCl_3$ )  $\delta$  7.29 – 7.23 (m, 1H), 7.17 – 7.12 (m, 1H), 6.91 (t,  $J = 7.4$  Hz, 1H), 6.84 (d,  $J = 8.2$  Hz, 1H), 5.66 (s, 1H), 4.94 (d,  $J = 3.3$  Hz, 1H), 3.86 (d,  $J = 2.7$  Hz, 1H), 2.24 (dt,  $J = 13.1, 2.4$  Hz, 1H), 2.11 (ddd,  $J = 13.2, 9.6, 6.3$  Hz, 2H), 1.88 (dd,  $J$

= 13.3, 4.7 Hz, 1H), 1.82 – 1.72 (m, 1H), 1.72 – 1.60 (m, 2H), 1.52 (ddd,  $J = 15.0, 7.3, 3.7$  Hz, 1H), 1.46 – 1.36 (m, 1H), 1.32 (ddd,  $J = 13.2, 9.0, 5.0$  Hz, 1H) ppm.  $^{13}\text{C}$  NMR (125 MHz,  $\text{CDCl}_3$ )  $\delta$  153.2, 130.5, 129.6, 120.8, 120.7, 116.0, 91.6, 90.1, 84.2, 42.4, 33.6, 32.1, 30.5, 26.7, 23.4 ppm. HRMS:  $[\text{M}-\text{H}]^-$  *calcd.* For  $\text{C}_{15}\text{H}_{16}\text{NO}_4^-$  274.1085, found 274.1090.  $[\alpha]_{\text{D}}^{20}$  16.59 ( $c = 0.67$  in  $\text{CHCl}_3$ ). The enantiomeric excess was determined by HPLC analysis on Daicel Chiralpak IB column [ $n$ -hexane/ $i$ -PrOH = 95/5, 1 mL/min],  $\lambda = 210$  nm,  $t_{\text{major}} = 7.85$  min,  $t_{\text{minor}} = 7.40$  min, **ee = 93%**. The enantiomeric excess after recrystallization was determined by HPLC analysis on Daicel Chiralpak IB column [ $n$ -hexane/ $i$ -PrOH = 95/5, 1 mL/min],  $\lambda = 210$  nm,  $t_{\text{major}} = 7.99$  min,  $t_{\text{minor}} = 7.47$  min, **ee >99%**. The diastereomeric ratio was determined by  $^1\text{H}$  NMR, **dr >20:1**.

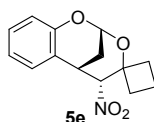

**5e** was obtained as a white solid 32 mg in 61% yield for two steps after column chromatography on silica gel (petroleum ether/ethyl acetate = 60/1-40/1).  $^1\text{H}$  NMR (400 MHz,  $\text{CDCl}_3$ )  $\delta$  7.26 – 7.20 (m, 1H), 7.14 (dd,  $J = 7.6, 1.4$  Hz, 1H), 6.91 (td,  $J = 7.5, 0.9$  Hz, 1H), 6.83 (d,  $J = 8.2$  Hz, 1H), 5.66 (s, 1H), 4.72 (d,  $J = 3.0$  Hz, 1H), 3.74 (d,  $J = 2.7$  Hz, 1H), 2.61 – 2.48 (m, 1H), 2.34 – 2.13 (m, 3H), 2.09 (ddd,  $J = 13.2, 4.0, 1.9$  Hz, 1H), 1.76 (ddq,  $J = 10.7, 8.3, 5.3$  Hz, 2H), 1.55 – 1.40 (m, 1H) ppm.  $^{13}\text{C}$  NMR (101 MHz,  $\text{CDCl}_3$ )  $\delta$  153.1, 130.8, 129.7, 120.9, 120.1, 116.1, 92.1, 89.9, 60.5, 34.1, 32.3, 31.3, 30.4, 13.8 ppm. HRMS:  $[\text{M}-\text{H}]^-$  *calcd.* For  $\text{C}_{14}\text{H}_{14}\text{NO}_4^-$  260.0928, found 260.0933.  $[\alpha]_{\text{D}}^{20}$  11.86 ( $c = 1.18$  in  $\text{CHCl}_3$ ). The enantiomeric excess was determined by HPLC analysis on Daicel Chiralpak IB column [ $n$ -hexane/ $i$ -PrOH = 98/2, 1 mL/min],  $\lambda = 210$  nm,  $t_{\text{major}} = 14.04$  min,  $t_{\text{minor}} = 13.17$  min, **ee = 95%**. The diastereomeric ratio was determined by  $^1\text{H}$  NMR, **dr >20:1**.

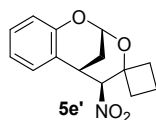

**5e'** was obtained as a white solid 10 mg in 19% yield for two steps after column chromatography on silica gel (petroleum ether/ethyl acetate = 60/1). <sup>1</sup>H NMR (400 MHz, CDCl<sub>3</sub>) δ 7.28 – 7.18 (m, 2H), 6.96 (t, *J* = 7.4 Hz, 1H), 6.86 (d, *J* = 8.1 Hz, 1H), 5.75 (s, 1H), 4.91 (d, *J* = 2.6 Hz, 1H), 3.62 (s, 1H), 2.60 (dt, *J* = 13.6, 2.5 Hz, 1H), 2.32 (dd, *J* = 22.5, 9.7 Hz, 1H), 2.18 – 2.00 (m, 2H), 1.86 – 1.78 (m, 1H), 1.73 (ddd, *J* = 14.5, 10.1, 5.1 Hz, 1H), 1.54 – 1.40 (m, 1H), 1.08 (ddt, *J* = 12.9, 8.7, 4.2 Hz, 1H) ppm. <sup>13</sup>C NMR (101 MHz, CDCl<sub>3</sub>) δ 153.9, 129.9, 128.4, 121.6, 121.2, 116.8, 92.7, 89.2, 73.7, 35.9, 33.9, 32.6, 22.8, 12.8 ppm. HRMS: [M-H]<sup>-</sup> *calcd.* For C<sub>14</sub>H<sub>14</sub>NO<sub>4</sub><sup>-</sup> 260.0928, found 260.0924. [α]<sub>D</sub><sup>20</sup> 71.17 (*c* = 2.39 in CHCl<sub>3</sub>). The enantiomeric excess was determined by HPLC analysis on Daicel Chiralpak IC column [*n*-hexane/*i*-PrOH = 90/10, 1 mL/min], λ = 210 nm, *t*<sub>major</sub> = 7.47 min, *t*<sub>minor</sub> = 5.99 min, **ee** = **98%**. The diastereomeric ratio was determined by <sup>1</sup>H NMR, **dr** >**20:1**.

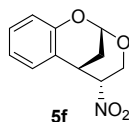

**5f** was obtained as a white solid 10 mg in 23% yield for two steps after column chromatography on silica gel (petroleum ether/ethyl acetate = 20/1-10/1). <sup>1</sup>H NMR (400 MHz, CDCl<sub>3</sub>) δ 7.24 (d, *J* = 1.7 Hz, 1H), 6.96 (dd, *J* = 11.9, 4.7 Hz, 2H), 6.90 (t, *J* = 7.4 Hz, 1H), 5.58 (s, 1H), 4.80 (ddd, *J* = 11.2, 5.1, 3.9 Hz, 1H), 4.16 (dd, *J* = 12.0, 5.2 Hz, 1H), 3.94 (d, *J* = 2.2 Hz, 1H), 3.88 (t, *J* = 11.6 Hz, 1H), 2.26 (dt, *J* = 13.4, 2.3 Hz, 1H), 2.11 (ddd, *J* = 13.4, 3.9, 1.9 Hz, 1H) ppm. <sup>13</sup>C NMR (101 MHz, CDCl<sub>3</sub>) δ 154.8, 152.1, 130.1, 129.6, 121.6, 115.7, 91.1, 81.0, 57.9, 33.0, 28.8 ppm. HRMS: [M-H]<sup>-</sup> *calcd.* For C<sub>11</sub>H<sub>10</sub>NO<sub>4</sub><sup>-</sup> 220.0615, found 220.0618. [α]<sub>D</sub><sup>20</sup> -40.39 (*c* = 0.29 in CHCl<sub>3</sub>). The enantiomeric excess was determined by HPLC analysis on Daicel Chiralpak IC column [*n*-hexane/*i*-PrOH = 90/10, 1 mL/min], λ = 210 nm, *t*<sub>major</sub> = 8.64 min, *t*<sub>minor</sub> = 7.66 min, **ee** = **98%**. The diastereomeric ratio was determined by NMR, **dr** >**20:1**.

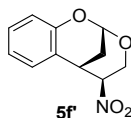

**5f'** was obtained as a white solid 26.2 mg in 59% yield for two steps after column chromatography on silica gel (petroleum ether/ethyl acetate = 60/1). **<sup>1</sup>H NMR** (400 MHz, CDCl<sub>3</sub>)  $\delta$  7.32 – 7.26 (m, 1H), 7.19 (dd,  $J$  = 7.8, 1.4 Hz, 1H), 7.02 – 6.95 (m, 2H), 5.64 (s, 1H), 4.51 (d,  $J$  = 14.1 Hz, 1H), 4.30 (d,  $J$  = 0.9 Hz, 1H), 4.00 – 3.88 (m, 2H), 2.36 (dt,  $J$  = 13.7, 2.4 Hz, 1H), 1.84 (ddd,  $J$  = 13.7, 2.0, 1.2 Hz, 1H) ppm. **<sup>13</sup>C NMR** (101 MHz, CDCl<sub>3</sub>)  $\delta$  155.0, 129.8, 128.7, 121.5, 116.3, 92.4, 82.7, 58.8, 31.3, 24.6 ppm. **HRMS**: [M-H]<sup>-</sup> *calcd.* For C<sub>11</sub>H<sub>10</sub>NO<sub>4</sub><sup>-</sup> 220.0615, found 220.0613. [ $\alpha$ ]<sub>D</sub><sup>20</sup> -25.53 ( $c$  = 0.75 in CHCl<sub>3</sub>). The enantiomeric excess was determined by HPLC analysis on Daicel Chiralpak ID column [*n*-hexane/*i*-PrOH = 90/10, 1 mL/min],  $\lambda$  = 210 nm,  $t_{major}$  = 12.21 min,  $t_{minor}$  = 10.70 min, **ee** = **95%**. The diastereomeric ratio was determined by NMR, **dr** >**20:1**.

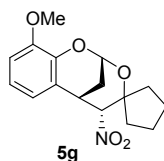

**5g** was obtained as a white solid 36 mg in 59% yield for two steps after column chromatography on silica gel (petroleum ether/ethyl acetate = 10/1-8/1). **<sup>1</sup>H NMR** (500 MHz, CDCl<sub>3</sub>)  $\delta$  6.90 – 6.83 (m, 2H), 6.74 (dd,  $J$  = 5.7, 3.4 Hz, 1H), 5.78 (d,  $J$  = 0.9 Hz, 1H), 4.92 (d,  $J$  = 3.3 Hz, 1H), 3.88 (s, 4H), 2.23 (dt,  $J$  = 13.1, 2.5 Hz, 1H), 2.14 – 2.02 (m, 2H), 1.91 – 1.82 (m, 1H), 1.75 (dd,  $J$  = 13.5, 7.5 Hz, 1H), 1.72 – 1.65 (m, 1H), 1.65 – 1.58 (m, 1H), 1.56 – 1.48 (m, 1H), 1.43 – 1.30 (m, 2H) ppm. **<sup>13</sup>C NMR** (125 MHz, CDCl<sub>3</sub>)  $\delta$  147.5, 142.8, 122.3, 121.7, 120.6, 111.6, 91.9, 90.2, 84.4, 56.1, 42.7, 33.7, 32.1, 30.5, 26.9, 23.6 ppm. **HRMS**: [M+Na]<sup>+</sup> *calcd.* For C<sub>16</sub>H<sub>19</sub>NNaO<sub>5</sub><sup>+</sup> 328.1155, found 328.1151. [ $\alpha$ ]<sub>D</sub><sup>20</sup> -22.27 ( $c$  = 1.43 in CHCl<sub>3</sub>). The enantiomeric excess was determined by HPLC analysis on Daicel Chiralpak IB column [*n*-hexane/*i*-PrOH = 95/5, 1 mL/min],  $\lambda$  = 210 nm,  $t_{major}$  = 17.01 min,  $t_{minor}$  = 15.65 min, **ee** = **94%**. The diastereomeric ratio was determined by NMR, **dr** >**20:1**.

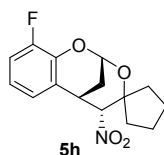

**5h** was obtained as a white solid 38 mg in 65% yield for two steps after column chromatography on silica gel (petroleum ether/ethyl acetate = 30/1-20/1). **<sup>1</sup>H NMR** (500 MHz, CDCl<sub>3</sub>)  $\delta$  7.07 (ddd,  $J$  = 10.6, 8.2, 1.4 Hz, 1H), 6.94 (d,  $J$  = 7.7 Hz, 1H), 6.85 (td,  $J$  = 8.0, 4.9 Hz, 1H), 5.76 (s, 1H), 4.94 (d,  $J$  = 3.4 Hz, 1H), 3.92 (d,  $J$  = 2.6 Hz, 1H), 2.27 (dt,  $J$  = 13.3, 2.5 Hz, 1H), 2.17 – 2.06 (m, 2H), 1.94 – 1.85 (m, 1H), 1.81 – 1.60 (m, 3H), 1.58 – 1.49 (m, 1H), 1.45 – 1.36 (m, 1H), 1.32 (ddd,  $J$  = 20.0, 10.1, 5.5 Hz, 1H) ppm. **<sup>13</sup>C NMR** (125 MHz, CDCl<sub>3</sub>)  $\delta$  151.7, 149.8, 125.7, 125.6, 123.4, 120.5, 120.4, 116.3, 116.2, 91.8, 90.0, 84.5, 42.6, 33.8, 31.8, 31.8, 30.4, 26.9, 23.6 ppm. **HRMS**: [M-H]<sup>-</sup> *calcd.* For C<sub>15</sub>H<sub>15</sub>FNO<sub>4</sub><sup>-</sup> 292.0991, found 292.0992. [ $\alpha$ ]<sub>D</sub><sup>20</sup> 21.87 ( $c$  = 1.45 in CHCl<sub>3</sub>). The enantiomeric excess was determined by HPLC analysis on Daicel Chiralpak Chiral-NS (2) column [*n*-hexane/*i*-PrOH = 95/5, 1 mL/min],  $\lambda$  = 210 nm,  $t_{major}$  = 12.14 min,  $t_{minor}$  = 11.49 min, **ee** = **94%**. The diastereomeric ratio was determined by NMR, **dr** >**20:1**.

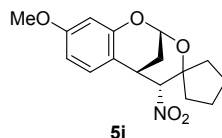

**5i** was obtained as a white solid 18 mg in 29% yield for two steps after column chromatography on silica gel (petroleum ether/ethyl acetate = 50/1-20/1). **<sup>1</sup>H NMR** (500 MHz, CDCl<sub>3</sub>)  $\delta$  7.04 (d,  $J$  = 8.5 Hz, 1H), 6.49 (dd,  $J$  = 8.5, 2.5 Hz, 1H), 6.40 (d,  $J$  = 2.5 Hz, 1H), 5.63 (d,  $J$  = 0.8 Hz, 1H), 4.90 (d,  $J$  = 3.2 Hz, 1H), 3.81 (d,  $J$  = 3.0 Hz, 1H), 3.78 (s, 3H), 2.21 (dt,  $J$  = 13.1, 2.5 Hz, 1H), 2.16 – 2.04 (m, 2H), 1.87 (ddd,  $J$  = 12.2, 5.2, 3.4 Hz, 1H), 1.81 – 1.71 (m, 1H), 1.70 – 1.59 (m, 2H), 1.56 – 1.48 (m, 1H), 1.45 – 1.31 (m, 2H) ppm. **<sup>13</sup>C NMR** (125 MHz, CDCl<sub>3</sub>)  $\delta$  161.1, 154.2, 131.2, 113.1, 107.3, 101.3, 91.8, 90.3, 84.4, 55.4, 42.5, 33.9, 31.6, 30.9, 26.8, 23.5 ppm. **HRMS**: [M-H]<sup>-</sup> *calcd.* For C<sub>16</sub>H<sub>18</sub>NO<sub>5</sub><sup>-</sup> 304.1190, found 304.1182. [ $\alpha$ ]<sub>D</sub><sup>20</sup> -27.15 ( $c$  = 1.33 in CHCl<sub>3</sub>). The enantiomeric excess was determined by HPLC analysis on Daicel

Chiralpak IB column [*n*-hexane/*i*-PrOH = 90/10, 1 mL/min],  $\lambda = 210$  nm,  $t_{major} = 8.37$  min,  $t_{minor} = 7.06$  min, **ee** = **92%**. The diastereomeric ratio was determined by NMR, **dr** >**20:1**.

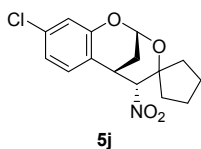

**5j** was obtained as a yellow oil 32 mg in 52% yield for two steps after column chromatography on silica gel (petroleum ether/ethyl acetate = 30/1-20/1). **<sup>1</sup>H NMR** (500 MHz, CDCl<sub>3</sub>)  $\delta$  7.10 (d,  $J = 8.2$  Hz, 1H), 6.90 (dd,  $J = 8.2, 1.0$  Hz, 1H), 6.87 (s, 1H), 5.65 (s, 1H), 4.93 (d,  $J = 3.1$  Hz, 1H), 3.83 (d,  $J = 2.3$  Hz, 1H), 2.23 (d,  $J = 13.2$  Hz, 1H), 2.18 – 2.10 (m, 1H), 2.05 (ddd,  $J = 13.3, 3.6, 1.4$  Hz, 1H), 1.88 (dd,  $J = 9.9, 8.2$  Hz, 1H), 1.77 – 1.60 (m, 3H), 1.56 – 1.46 (m, 1H), 1.46 – 1.37 (m, 1H), 1.35 – 1.28 (m, 1H) ppm. **<sup>13</sup>C NMR** (125 MHz, CDCl<sub>3</sub>)  $\delta$  153.8, 135.0, 131.5, 121.0, 119.5, 116.2, 91.6, 89.9, 84.2, 42.3, 33.7, 31.5, 30.3, 26.6, 23.3 ppm. **HRMS**: [M-H]<sup>-</sup> *calcd.* For C<sub>15</sub>H<sub>15</sub>ClNO<sub>4</sub><sup>-</sup> 308.0695, found 308.0699. **[ $\alpha$ ]<sub>D</sub><sup>20</sup>** -14.27 ( $c = 1.19$  in CHCl<sub>3</sub>). The enantiomeric excess was determined by HPLC analysis on Daicel Chiralpak IB column [*n*-hexane/*i*-PrOH = 95/5, 1 mL/min],  $\lambda = 210$  nm,  $t_{major} = 9.99$  min,  $t_{minor} = 7.88$  min, **ee** = **91%**. The diastereomeric ratio was determined by NMR, **dr** >**20:1**.

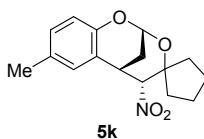

**5k** was obtained as a white solid 40.8 mg in 71% yield for two steps after column chromatography on silica gel (petroleum ether/ethyl acetate = 30/1). **<sup>1</sup>H NMR** (500 MHz, CDCl<sub>3</sub>)  $\delta$  7.05 (dd,  $J = 8.3, 1.8$  Hz, 1H), 6.92 (d,  $J = 1.5$  Hz, 1H), 6.73 (d,  $J = 8.3$  Hz, 1H), 5.63 (d,  $J = 0.8$  Hz, 1H), 4.92 (d,  $J = 3.3$  Hz, 1H), 3.82 (d,  $J = 3.0$  Hz, 1H), 2.27 (s, 3H), 2.22 (dt,  $J = 13.1, 2.5$  Hz, 1H), 2.12 – 2.04 (m, 2H), 1.90 – 1.83 (m, 1H), 1.80 – 1.74 (m, 1H), 1.72 – 1.60 (m, 2H), 1.56 – 1.49 (m, 1H), 1.44 – 1.32 (m, 2H) ppm. **<sup>13</sup>C NMR** (125 MHz, CDCl<sub>3</sub>)  $\delta$  151.0, 130.7, 130.3, 130.0, 120.5, 115.7,



91.6, 90.2, 84.1, 42.5, 33.7, 32.1, 30.7, 26.7, 23.4, 20.5 ppm. **HRMS**:  $[M-H]^-$  *calcd.* For  $C_{16}H_{18}NO_4^-$  288.1241, found 288.1248.  $[\alpha]_D^{20}$  29.37 ( $c = 0.96$  in  $CHCl_3$ ). The enantiomeric excess was determined by HPLC analysis on Daicel Chiralpak IB column [*n*-hexane/*i*-PrOH = 80/20, 1 mL/min],  $\lambda = 210$  nm,  $t_{major} = 7.25$  min,  $t_{minor} = 6.13$  min, **ee** = **85%**. The diastereomeric ratio was determined by NMR, **dr** >**20:1**.

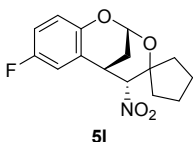

**5l** was obtained as a white solid 38 mg in 65% yield for two steps after column chromatography on silica gel (petroleum ether/ethyl acetate = 30/1-20/1). **<sup>1</sup>H NMR** (500 MHz,  $CDCl_3$ )  $\delta$  6.99 – 6.88 (m, 2H), 6.77 (dd,  $J = 8.9, 4.7$  Hz, 1H), 5.63 (d,  $J = 1.0$  Hz, 1H), 4.91 (d,  $J = 3.4$  Hz, 1H), 3.82 (d,  $J = 3.1$  Hz, 1H), 2.26 – 2.10 (m, 2H), 2.05 (ddd,  $J = 13.2, 4.2, 2.0$  Hz, 1H), 1.90 – 1.83 (m, 1H), 1.79 – 1.59 (m, 3H), 1.55 – 1.49 (m, 1H), 1.47 – 1.33 (m, 1H), 1.27 (ddd,  $J = 15.7, 8.0, 3.0$  Hz, 1H) ppm. **<sup>13</sup>C NMR** (125 MHz,  $CDCl_3$ )  $\delta$  157.7, 155.8, 149.5, 122.0, 117.1, 117.0, 116.9, 116.9, 116.7, 116.5, 91.7, 90.0, 84.4, 42.6, 33.8, 32.0, 30.4, 26.7, 23.5 ppm. **HRMS**:  $[M-H]^-$  *calcd.* For  $C_{15}H_{15}FNO_4^-$  292.0991, found 292.0993.  $[\alpha]_D^{20}$  8.50 ( $c = 1.57$  in  $CHCl_3$ ). The enantiomeric excess was determined by HPLC analysis on Daicel Chiralpak IB column [*n*-hexane/*i*-PrOH = 90/10, 1 mL/min],  $\lambda = 210$  nm,  $t_{major} = 7.73$  min,  $t_{minor} = 7.05$  min, **ee** = **92%**. The diastereomeric ratio was determined by NMR **dr** >**20:1**.

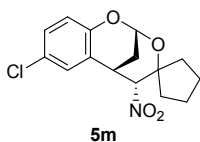

**5m** was obtained as a white solid 30 mg in 48% yield for two steps after column chromatography on silica gel (petroleum ether/ethyl acetate = 30/1-15/1). **<sup>1</sup>H NMR** (500 MHz,  $CDCl_3$ )  $\delta$  7.24 – 7.16 (m, 2H), 6.78 (d,  $J = 8.6$  Hz, 1H), 5.65 (d,  $J = 1.0$  Hz, 1H), 4.92 (d,  $J = 3.4$  Hz, 1H), 3.82 (d,  $J = 3.0$  Hz, 1H), 2.23 (dt,  $J = 13.3, 2.5$  Hz, 1H), 2.20 – 2.13 (m, 1H), 2.05 (ddd,  $J = 13.3, 4.2, 2.0$  Hz, 1H), 1.91 – 1.85 (m, 1H), 1.77 –

1.60 (m, 3H), 1.53 (ddd,  $J = 15.3, 7.3, 3.6$  Hz, 1H), 1.45 – 1.38 (m, 1H), 1.31 (ddd,  $J = 12.1, 8.6, 3.3$  Hz, 1H) ppm.  $^{13}\text{C}$  NMR (125 MHz,  $\text{CDCl}_3$ )  $\delta$  152.0, 130.4, 129.8, 125.7, 122.6, 117.4, 91.8, 89.9, 84.4, 42.5, 33.8, 31.9, 30.4, 26.7, 23.5 ppm. **HRMS**:  $[\text{M-H}]^-$  *calcd.* For  $\text{C}_{15}\text{H}_{15}\text{ClNO}_4^-$  308.0695, found 308.0690.  $[\alpha]_{\text{D}}^{20}$  55.19 ( $c = 1.11$  in  $\text{CHCl}_3$ ). The enantiomeric excess was determined by HPLC analysis on Daicel Chiralpak IB column [ $n$ -hexane/ $i$ -PrOH = 95/5, 1 mL/min],  $\lambda = 210$  nm,  $t_{\text{major}} = 9.53$  min,  $t_{\text{minor}} = 8.59$  min, **ee** = **93%**. The diastereomeric ratio was determined by NMR **dr** >**20:1**.

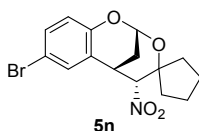

**5n** was obtained as a white solid 42 mg in 59% yield for two steps after column chromatography on silica gel (petroleum ether/ethyl acetate = 20/1).  $^1\text{H}$  NMR (500 MHz,  $\text{CDCl}_3$ )  $\delta$  7.40 – 7.29 (m, 2H), 6.73 (d,  $J = 8.6$  Hz, 1H), 5.65 (s, 1H), 4.92 (d,  $J = 3.3$  Hz, 1H), 3.82 (d,  $J = 3.0$  Hz, 1H), 2.31 – 2.09 (m, 2H), 2.04 (ddd,  $J = 13.3, 4.1, 2.0$  Hz, 1H), 1.93 – 1.83 (m, 1H), 1.80 – 1.59 (m, 3H), 1.56 – 1.49 (m, 1H), 1.48 – 1.36 (m, 1H), 1.36 – 1.23 (m, 1H) ppm.  $^{13}\text{C}$  NMR (125 MHz,  $\text{CDCl}_3$ )  $\delta$  152.6, 133.3, 132.7, 123.1, 117.9, 112.9, 91.7, 89.9, 84.4, 42.5, 33.8, 31.8, 30.3, 26.7, 23.5 ppm. **HRMS**:  $[\text{M-H}]^-$  *calcd.* For  $\text{C}_{15}\text{H}_{15}\text{BrNO}_4^-$  352.0190, found 352.0194.  $[\alpha]_{\text{D}}^{20}$  64.83 ( $c = 1.89$  in  $\text{CHCl}_3$ ). The enantiomeric excess was determined by HPLC analysis on Daicel Chiralpak IB column [ $n$ -hexane/ $i$ -PrOH = 90/10, 1 mL/min],  $\lambda = 210$  nm,  $t_{\text{major}} = 8.77$  min,  $t_{\text{minor}} = 7.87$  min, **ee** = **93%**. The diastereomeric ratio was determined by NMR **dr** >**20:1**.

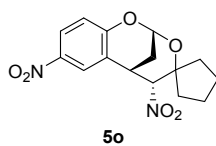

**5o** was obtained as a white solid 20 mg in 31% yield for two steps after column chromatography on silica gel (petroleum ether/ethyl acetate = 5/1).  $^1\text{H}$  NMR (500

MHz, CDCl<sub>3</sub>)  $\delta$  8.21 (d,  $J = 2.6$  Hz, 1H), 8.17 (dd,  $J = 9.0, 2.7$  Hz, 1H), 6.95 (d,  $J = 9.0$  Hz, 1H), 5.76 (s, 1H), 5.01 (d,  $J = 3.3$  Hz, 1H), 3.93 (d,  $J = 2.8$  Hz, 1H), 2.32 (dt,  $J = 13.5, 2.3$  Hz, 1H), 2.29 – 2.19 (m, 1H), 2.08 (ddd,  $J = 13.5, 4.0, 1.9$  Hz, 1H), 1.98 – 1.89 (m, 1H), 1.71 – 1.61 (m, 3H), 1.56 – 1.50 (m, 1H), 1.46 – 1.34 (m, 1H), 1.28 – 1.22 (m, 1H) ppm. <sup>13</sup>C NMR (125 MHz, CDCl<sub>3</sub>)  $\delta$  158.7, 127.5, 125.8, 121.8, 116.8, 110.1, 92.3, 89.6, 84.6, 42.3, 33.7, 31.7, 30.1, 26.6, 23.4 ppm. HRMS: [M-H]<sup>-</sup> *calcd.* For C<sub>15</sub>H<sub>15</sub>N<sub>2</sub>O<sub>6</sub><sup>-</sup> 319.0936, found 319.0934. [ $\alpha$ ]<sub>D</sub><sup>20</sup> 105.07 ( $c = 0.81$  in CHCl<sub>3</sub>). The enantiomeric excess was determined by HPLC analysis on Daicel Chiralpak IB column [*n*-hexane/*i*-PrOH = 90/10, 1 mL/min],  $\lambda = 210$  nm,  $t_{major} = 21.01$  min,  $t_{minor} = 18.43$  min, **ee = 87%**. The diastereomeric ratio was determined by NMR ***dr* >20:1**.

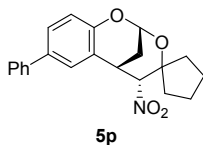

**5p** was obtained as a white solid 40.6 mg in 58% yield for two steps after column chromatography on silica gel (petroleum ether/ethyl acetate = 50/1-20/1). <sup>1</sup>H NMR (400 MHz, CDCl<sub>3</sub>)  $\delta$  7.59 – 7.53 (m, 2H), 7.51 (dd,  $J = 8.4, 2.3$  Hz, 1H), 7.47 – 7.38 (m, 3H), 7.35 – 7.28 (m, 1H), 6.92 (d,  $J = 8.4$  Hz, 1H), 5.70 (d,  $J = 1.1$  Hz, 1H), 4.98 (d,  $J = 3.3$  Hz, 1H), 3.92 (d,  $J = 3.1$  Hz, 1H), 2.27 (dt,  $J = 13.2, 2.5$  Hz, 1H), 2.21 – 2.08 (m, 2H), 1.98 – 1.86 (m, 1H), 1.79 (dt,  $J = 8.0, 6.8$  Hz, 1H), 1.76 – 1.61 (m, 2H), 1.54 (ddd,  $J = 11.7, 7.6, 3.5$  Hz, 1H), 1.48 – 1.35 (m, 2H) ppm. <sup>13</sup>C NMR (101 MHz, CDCl<sub>3</sub>)  $\delta$  152.8, 140.3, 133.9, 129.2, 128.8, 128.4, 126.9, 126.8, 121.2, 116.3, 91.8, 90.2, 84.3, 42.5, 33.8, 32.2, 30.6, 26.7, 23.4 ppm. HRMS: [M-H]<sup>-</sup> *calcd.* For C<sub>21</sub>H<sub>20</sub>NO<sub>4</sub><sup>-</sup> 350.1398, found 350.1395. [ $\alpha$ ]<sub>D</sub><sup>20</sup> 112.91 ( $c = 1.50$  in CHCl<sub>3</sub>). The enantiomeric excess was determined by HPLC analysis on Daicel Chiralpak IA column [*n*-hexane/*i*-PrOH = 98/2, 1 mL/min],  $\lambda = 204$  nm,  $t_{major} = 13.12$  min,  $t_{minor} = 10.33$  min, **ee = 87%**. The diastereomeric ratio was determined by NMR ***dr* >20:1**.

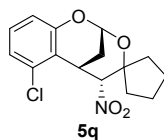

**5q** was obtained as a white solid 38 mg in 59% yield for two steps after column chromatography on silica gel (petroleum ether/ethyl acetate = 40/1). **<sup>1</sup>H NMR** (500 MHz, CDCl<sub>3</sub>)  $\delta$  7.20 (t,  $J$  = 8.1 Hz, 1H), 7.03 (d,  $J$  = 7.9 Hz, 1H), 6.80 (d,  $J$  = 8.3 Hz, 1H), 5.67 (s, 1H), 5.10 (d,  $J$  = 3.1 Hz, 1H), 4.25 (d,  $J$  = 2.0 Hz, 1H), 2.28 (d,  $J$  = 13.3 Hz, 1H), 1.97 (dd,  $J$  = 13.3, 1.6 Hz, 1H), 1.93 – 1.66 (m, 5H), 1.60 (dd,  $J$  = 15.5, 6.9 Hz, 1H), 1.53 – 1.44 (m, 1H), 1.34 – 1.26 (m, 1H) ppm. **<sup>13</sup>C NMR** (125 MHz, CDCl<sub>3</sub>)  $\delta$  154.4, 134.9, 129.9, 122.1, 119.6, 115.1, 92.0, 90.0, 83.9, 41.8, 33.7, 30.7, 30.1, 26.9, 23.0 ppm. **HRMS**: [M-H]<sup>-</sup> *calcd.* For C<sub>15</sub>H<sub>15</sub>ClNO<sub>4</sub><sup>-</sup> 308.0695, found 308.0690. **[ $\alpha$ ]<sub>D</sub><sup>20</sup>** 106.36 ( $c$  = 1.44 in CHCl<sub>3</sub>). The enantiomeric excess was determined by HPLC analysis on Daicel Chiralpak IC column [*n*-hexane/*i*-PrOH = 90/10, 1 mL/min],  $\lambda$  = 210 nm,  $t_{major}$  = 7.23 min,  $t_{minor}$  = 6.24 min, **ee** = **92%**. The diastereomeric ratio was determined by NMR **dr** >**20:1**.

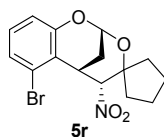

**5r** was obtained as a white solid 55 mg in 78% yield for two steps after column chromatography on silica gel (petroleum ether/ethyl acetate = 60/1). **<sup>1</sup>H NMR** (400 MHz, CDCl<sub>3</sub>)  $\delta$  7.21 (dd,  $J$  = 8.0, 1.2 Hz, 1H), 7.13 (t,  $J$  = 8.1 Hz, 1H), 6.84 (dd,  $J$  = 8.2, 0.8 Hz, 1H), 5.65 (d,  $J$  = 1.4 Hz, 1H), 5.09 (d,  $J$  = 3.4 Hz, 1H), 4.24 (d,  $J$  = 3.1 Hz, 1H), 2.27 (dd,  $J$  = 9.2, 6.7 Hz, 1H), 1.97 (ddd,  $J$  = 13.3, 3.9, 2.2 Hz, 1H), 1.94 – 1.64 (m, 5H), 1.64 – 1.53 (m, 1H), 1.52 – 1.42 (m, 1H), 1.33 – 1.21 (m, 1H) ppm. **<sup>13</sup>C NMR** (101 MHz, CDCl<sub>3</sub>)  $\delta$  154.5, 130.3, 125.4, 121.2, 115.8, 92.1, 90.1, 83.8, 41.8, 33.6, 32.3, 30.8, 26.9, 23.0 ppm. **HRMS**: [M-H]<sup>-</sup> *calcd.* For C<sub>15</sub>H<sub>15</sub>BrNO<sub>4</sub><sup>-</sup> 352.0190, found 352.0188. **[ $\alpha$ ]<sub>D</sub><sup>20</sup>** 118.10 ( $c$  = 1.90 in CHCl<sub>3</sub>). The enantiomeric excess was determined by HPLC analysis on Daicel Chiralpak IC column [*n*-hexane/*i*-PrOH = 95/5, 1 mL/min],  $\lambda$  = 210 nm,  $t_{major}$  = 8.86 min,  $t_{minor}$  = 7.29 min, **ee** = **93%**. The

enantiomeric excess after recrystallization was determined by HPLC analysis on Daicel Chiralpak IC column [*n*-hexane/*i*-PrOH = 95/5, 1 mL/min],  $\lambda = 210$  nm,  $t_{major} = 7.81$  min,  $t_{minor} = 6.31$  min, **ee** >**99%**. The diastereomeric ratio was determined by NMR **dr** >**20:1**.

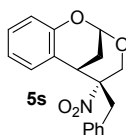

**5s** was obtained as a white solid 16.3 mg in 26% yield for two steps after column chromatography on silica gel (petroleum ether/ethyl acetate = 30/1). **<sup>1</sup>H NMR** (500 MHz, CDCl<sub>3</sub>)  $\delta$  7.39 – 7.32 (m, 1H), 7.30 – 7.22 (m, 4H), 7.07 – 6.99 (m, 2H), 6.88 (dd,  $J = 7.4, 1.9$  Hz, 2H), 5.62 (d,  $J = 1.6$  Hz, 1H), 4.25 (dd,  $J = 13.7, 1.3$  Hz, 1H), 3.94 (s, 1H), 3.66 (d,  $J = 13.7$  Hz, 1H), 3.29 (d,  $J = 14.3$  Hz, 1H), 2.76 (d,  $J = 14.3$  Hz, 1H), 2.11 (dt,  $J = 13.9, 2.4$  Hz, 1H), 1.95 – 1.87 (m, 1H) ppm. **<sup>13</sup>C NMR** (101 MHz, CDCl<sub>3</sub>)  $\delta$  154.8, 132.4, 130.7, 130.0, 129.3, 128.8, 128.0, 121.0, 120.9, 116.3, 91.8, 91.6, 61.9, 42.7, 37.1, 26.5 ppm. **HRMS**:  $[M+H]^+$  *calcd.* For C<sub>18</sub>H<sub>18</sub>NO<sub>4</sub><sup>+</sup> 312.1230, found 312.1233.  $[\alpha]_D^{20}$  -44.55 ( $c = 1.24$  in CHCl<sub>3</sub>). The enantiomeric excess was determined by HPLC analysis on Daicel Chiralpak IB column [*n*-hexane/*i*-PrOH = 85/15, 1 mL/min],  $\lambda = 210$  nm,  $t_{major} = 8.62$  min,  $t_{minor} = 6.88$  min, **ee** = **85%**. The diastereomeric ratio was determined by NMR **dr** >**20:1**.

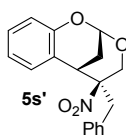

**5s'** was obtained as a white solid 11.4 mg in 18% yield for two steps after column chromatography on silica gel (petroleum ether/ethyl acetate = 60/1). **<sup>1</sup>H NMR** (400 MHz, CDCl<sub>3</sub>)  $\delta$  7.32 (pd,  $J = 4.5, 1.8$  Hz, 3H), 7.25 – 7.18 (m, 1H), 7.17 – 7.11 (m, 2H), 6.99 (dd,  $J = 7.6, 1.5$  Hz, 1H), 6.89 (ddd,  $J = 11.1, 8.4, 4.5$  Hz, 2H), 5.65 (s, 1H), 3.91 – 3.80 (m, 2H), 3.73 (s, 1H), 3.61 (d,  $J = 13.8$  Hz, 1H), 3.41 (d,  $J = 13.8$  Hz, 1H), 2.61 (dt,  $J = 13.7, 2.6$  Hz, 1H), 2.04 (ddd,  $J = 13.8, 3.4, 1.7$  Hz, 1H) ppm. **<sup>13</sup>C NMR**

(101 MHz, CDCl<sub>3</sub>)  $\delta$  154.7, 133.4, 129.9, 129.8, 129.6, 128.9, 128.0, 121.5, 120.9, 115.6, 91.4, 89.7, 58.5, 40.2, 37.6, 27.0 ppm. **HRMS**: [M+H]<sup>+</sup> *calcd.* For C<sub>18</sub>H<sub>18</sub>NO<sub>4</sub><sup>+</sup> 312.1230, found 312.1228. [ $\alpha$ ]<sub>D</sub><sup>20</sup> 2.90 (*c* = 0.82 in CHCl<sub>3</sub>). The enantiomeric excess was determined by HPLC analysis on Daicel Chiralpak IB column [*n*-hexane/*i*-PrOH = 85/15, 1 mL/min],  $\lambda$  = 210 nm, *t*<sub>major</sub> = 8.30 min, *t*<sub>minor</sub> = 7.61 min, **ee** = **82%**. The diastereomeric ratio was determined by NMR **dr** >**20:1**.

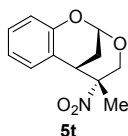

**5t** was obtained as a white solid 16 mg in 34% yield for two steps after column chromatography on silica gel (petroleum ether/ethyl acetate = 100/1). **<sup>1</sup>H NMR** (500 MHz, CDCl<sub>3</sub>)  $\delta$  7.30 – 7.26 (m, 1H), 7.13 (dd, *J* = 7.8, 1.4 Hz, 1H), 6.99 – 6.92 (m, 2H), 5.60 (d, *J* = 1.7 Hz, 1H), 4.49 (dd, *J* = 13.7, 1.4 Hz, 1H), 3.80 (s, 1H), 3.51 (d, *J* = 13.7 Hz, 1H), 2.15 (dt, *J* = 13.8, 2.4 Hz, 1H), 1.93 – 1.84 (m, 1H), 1.35 (s, 3H) ppm. **<sup>13</sup>C NMR** (101 MHz, CDCl<sub>3</sub>)  $\delta$  154.8, 130.5, 129.7, 121.0, 120.8, 116.1, 91.8, 88.2, 63.4, 36.1, 26.3, 22.6 ppm. **HRMS**: [M+H]<sup>+</sup> *calcd.* For C<sub>12</sub>H<sub>14</sub>NO<sub>4</sub><sup>+</sup> 236.0917, found 236.0922. [ $\alpha$ ]<sub>D</sub><sup>20</sup> 49.12 (*c* = 0.13 in CHCl<sub>3</sub>). The enantiomeric excess was determined by HPLC analysis on Daicel Chiralpak IA column [*n*-hexane/*i*-PrOH = 80/20, 1 mL/min],  $\lambda$  = 210 nm, *t*<sub>major</sub> = 6.82 min, *t*<sub>minor</sub> = 6.24 min, **ee** = **98%**. The diastereomeric ratio was determined by NMR **dr** >**20:1**.

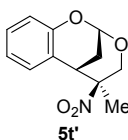

**5t'** was obtained as a white solid 21 mg in 45% yield for two steps after column chromatography on silica gel (petroleum ether/ethyl acetate = 30/1). **<sup>1</sup>H NMR** (400 MHz, CDCl<sub>3</sub>)  $\delta$  7.25 – 7.19 (m, 1H), 6.91 (dtd, *J* = 14.9, 7.9, 1.2 Hz, 3H), 5.56 (s, 1H), 4.06 (d, *J* = 12.1 Hz, 1H), 3.79 (dd, *J* = 12.1, 0.9 Hz, 1H), 3.59 (s, 1H), 2.39 (dt, *J* = 13.7, 2.6 Hz, 1H), 1.96 (ddd, *J* = 13.7, 3.5, 1.8 Hz, 1H), 1.89 (s, 3H) ppm. **<sup>13</sup>C NMR**

(101 MHz, CDCl<sub>3</sub>)  $\delta$  154.6, 129.8, 129.5, 121.4, 120.8, 115.6, 91.3, 85.8, 62.4, 37.7, 26.5, 23.4 ppm. **HRMS**: [M+H]<sup>+</sup> *calcd.* For C<sub>12</sub>H<sub>14</sub>NO<sub>4</sub><sup>+</sup> 236.0917, found 236.0920. **[ $\alpha$ ]<sub>D</sub><sup>20</sup>** -75.44 (*c* = 0.63 in CHCl<sub>3</sub>). The enantiomeric excess was determined by HPLC analysis on Daicel Chiralpak IA column [*n*-hexane/*i*-PrOH = 80/20, 1 mL/min],  $\lambda$  = 210 nm, *t*<sub>major</sub> = 7.48 min, *t*<sub>minor</sub> = 6.17 min, **ee** = **93%**. The diastereomeric ratio was determined by NMR **dr** >**20:1**.

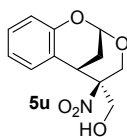

**5u** was obtained as a white solid 10 mg in 20% yield for two steps after column chromatography on silica gel (petroleum ether/ethyl acetate = 15/1). **<sup>1</sup>H NMR** (400 MHz, CDCl<sub>3</sub>)  $\delta$  7.30 – 7.23 (m, 2H), 7.02 – 6.91 (m, 2H), 5.64 (d, *J* = 1.7 Hz, 1H), 4.56 (dd, *J* = 13.7, 1.4 Hz, 1H), 3.99 (s, 1H), 3.74 (dd, *J* = 11.9, 5.6 Hz, 1H), 3.62 (dd, *J* = 17.6, 8.8 Hz, 2H), 2.18 (dt, *J* = 13.9, 2.4 Hz, 1H), 1.99 – 1.84 (m, 2H) ppm. **<sup>13</sup>C NMR** (101 MHz, CDCl<sub>3</sub>)  $\delta$  179.9, 154.7, 130.0, 129.9, 121.2, 116.2, 92.2, 91.9, 65.1, 60.8, 32.2, 25.9 ppm. **HRMS**: [M+H]<sup>+</sup> *calcd.* For C<sub>12</sub>H<sub>14</sub>NO<sub>5</sub><sup>+</sup> 252.0866, found 252.0864. **[ $\alpha$ ]<sub>D</sub><sup>20</sup>** -2.72 (*c* = 0.34 in CHCl<sub>3</sub>). The enantiomeric excess was determined by HPLC analysis on Daicel Chiralpak IA column [*n*-hexane/*i*-PrOH = 80/20, 1 mL/min],  $\lambda$  = 210 nm, *t*<sub>major</sub> = 10.37 min, *t*<sub>minor</sub> = 9.23 min, **ee** = **88%**. The diastereomeric ratio was determined by NMR **dr** >**20:1**.

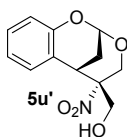

**5u'** was obtained as a white solid 10 mg in 20% yield for two steps after column chromatography on silica gel (petroleum ether/ethyl acetate = 4/1). **<sup>1</sup>H NMR** (400 MHz, CDCl<sub>3</sub>)  $\delta$  7.29 – 7.22 (m, 1H), 6.91 (ddd, *J* = 21.5, 11.4, 5.7 Hz, 3H), 5.58 (s, 1H), 4.34 – 4.16 (m, 2H), 4.05 (d, *J* = 12.5 Hz, 1H), 3.90 (d, *J* = 12.5 Hz, 1H), 3.81 (s, 1H), 2.55 – 2.37 (m, 1H), 2.32 (dt, *J* = 13.8, 2.5 Hz, 1H), 2.03 – 1.91 (m, 1H) ppm.

$^{13}\text{C}$  NMR (101 MHz,  $\text{CDCl}_3$ )  $\delta$  154.7, 130.0, 129.1, 121.5, 120.0, 115.7, 91.2, 89.6, 63.9, 58.3, 33.8, 26.6 ppm. **HRMS**:  $[\text{M}+\text{H}]^+$  *calcd.* For  $\text{C}_{12}\text{H}_{14}\text{NO}_5^+$  252.0866, found 252.0860.  $[\alpha]_{\text{D}}^{20}$  -53.74 ( $c = 0.19$  in  $\text{CHCl}_3$ ). The enantiomeric excess was determined by HPLC analysis on Daicel Chiralpak IA column [*n*-hexane/*i*-PrOH = 80/20, 1 mL/min],  $\lambda = 210$  nm,  $t_{\text{major}} = 9.50$  min,  $t_{\text{minor}} = 8.13$  min, **ee = 90%**. The diastereomeric ratio was determined by NMR ***dr* >20:1**.



## E. Scope of the reaction 2

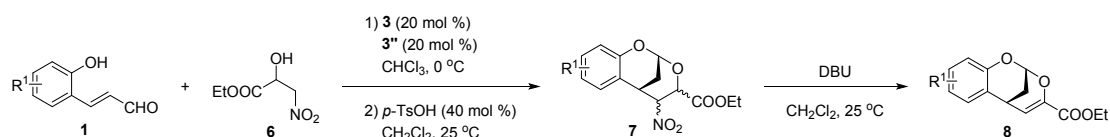

**General procedure:** A glass vial equipped with a magnetic stirring bar was charged with **6** (0.24 mmol, 1.2 equiv.), different substituted 2-hydroxycinnamaldehydes **1** (0.20 mmol, 1.0 equiv.), **3** (0.04 mmol, 0.2 equiv.) and **3''** (0.04 mmol, 0.2 equiv.) in  $\text{CHCl}_3$  (0.5 mL) at  $0\text{ }^\circ\text{C}$ . The resulting reaction mixture was kept under vigorous stirring until the consumption of **1** (monitored by TLC analysis). After completion of the reaction, the residue was purified by flash chromatography on silica gel (petroleum ether/ethyl acetate = 3/1 to 2/1) to afford the intermediate. Then, the intermediate (1.0 equiv.) was respectively dissolved in anhydrous  $\text{CH}_2\text{Cl}_2$  (0.10 mmol in 0.5 mL) at  $25\text{ }^\circ\text{C}$  and *p*-TsOH (0.4 equiv.) was added to the reaction mixture. After full conversion of the second step, the residue was purified by flash chromatography on silica gel (petroleum ether/ethyl acetate = 20/1 to 8/1) to give product **7**.

At last, compound **7** (1.0 equiv.) was respectively dissolved in  $\text{CH}_2\text{Cl}_2$  (0.10 mmol in 0.5 mL) at  $25\text{ }^\circ\text{C}$  and DBU (1.2 equiv.) was added to the reaction mixture. After full conversion of the third step, the residue was purified by flash chromatography on silica gel (petroleum ether/ethyl acetate = 20/1 to 5/1) to give product **8** for NMR and HPLC analysis.

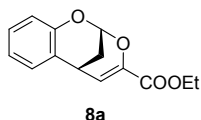

**8a** was obtained as a white solid 30 mg in 61% yield for three steps after column chromatography on silica gel (petroleum ether/ethyl acetate = 15/1). **<sup>1</sup>H NMR** (400 MHz, CDCl<sub>3</sub>)  $\delta$  7.19 – 7.03 (m, 2H), 6.99 – 6.84 (m, 2H), 6.41 (dd,  $J = 7.1, 1.4$  Hz, 1H), 6.16 (d,  $J = 1.9$  Hz, 1H), 4.23 (q,  $J = 7.1$  Hz, 2H), 3.59 – 3.47 (m, 1H), 2.15 – 1.99 (m, 2H), 1.29 (t,  $J = 7.1$  Hz, 3H) ppm. **<sup>13</sup>C NMR** (101 MHz, CDCl<sub>3</sub>)  $\delta$  162.3, 151.8, 141.8, 128.1, 127.3, 125.5, 121.2, 116.6, 115.0, 92.4, 61.4, 26.5, 24.8, 14.2 ppm. **HRMS**: [M+H]<sup>+</sup> *calcd.* For C<sub>14</sub>H<sub>15</sub>O<sub>4</sub><sup>+</sup> 247.0965, found 247.0967. [ $\alpha$ ]<sub>D</sub><sup>20</sup> 88.68 ( $c = 0.57$  in CHCl<sub>3</sub>). The enantiomeric excess was determined by HPLC analysis on Daicel Chiralpak IA column [*n*-hexane/*i*-PrOH = 90/10, 1 mL/min],  $\lambda = 210$  nm,  $t_{major} = 9.59$  min,  $t_{minor} = 8.72$  min, **ee = 95%**. The diastereomeric ratio was determined by NMR ***dr* >20:1**.

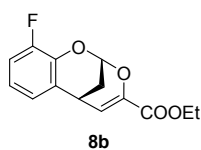

**8b** was obtained as a white solid 16.8 mg in 32% yield for three steps after column chromatography on silica gel (petroleum ether/ethyl acetate = 15/1). **<sup>1</sup>H NMR** (400 MHz, CDCl<sub>3</sub>)  $\delta$  6.97 – 6.90 (m, 1H), 6.83 (ddd,  $J = 12.2, 10.4, 5.5$  Hz, 2H), 6.41 (dd,  $J = 7.1, 1.5$  Hz, 1H), 6.25 (dd,  $J = 3.9, 2.0$  Hz, 1H), 4.24 (q,  $J = 7.1$  Hz, 2H), 3.58 (dd,  $J = 4.3, 2.6$  Hz, 1H), 2.13 (ddd,  $J = 13.2, 3.3, 2.0$  Hz, 1H), 2.06 (ddd,  $J = 13.2, 4.1, 2.3$  Hz, 1H), 1.30 (t,  $J = 7.1$  Hz, 3H) ppm. **<sup>13</sup>C NMR** (101 MHz, CDCl<sub>3</sub>)  $\delta$  162.1, 142.0, 128.2, 122.2, 121.1, 121.0, 115.2, 115.0, 114.4, 92.2, 61.5, 26.1, 24.6, 14.2 ppm. **HRMS**: [M+H]<sup>+</sup> *calcd.* For C<sub>14</sub>H<sub>14</sub>FO<sub>4</sub><sup>+</sup> 265.0871, found 265.0869. [ $\alpha$ ]<sub>D</sub><sup>20</sup> 45.86 ( $c = 1.34$  in CHCl<sub>3</sub>). The enantiomeric excess was determined by HPLC analysis on Daicel Chiralpak IB column [*n*-hexane/*i*-PrOH = 90/10, 1 mL/min],  $\lambda = 210$  nm,  $t_{major} = 9.71$  min,  $t_{minor} = 8.94$  min, **ee = 93%**. The diastereomeric ratio was determined by NMR ***dr* >20:1**.

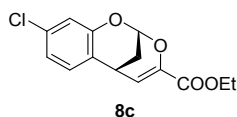

**8c** was obtained as a white solid 11 mg in 20% yield for three steps after column chromatography on silica gel (petroleum ether/ethyl acetate = 10/1-5/1). **<sup>1</sup>H NMR** (400 MHz, CDCl<sub>3</sub>)  $\delta$  7.00 (d,  $J$  = 8.1 Hz, 1H), 6.96 (d,  $J$  = 2.0 Hz, 1H), 6.87 (dd,  $J$  = 8.0, 2.0 Hz, 1H), 6.38 (dd,  $J$  = 7.1, 1.6 Hz, 1H), 6.15 (q,  $J$  = 2.0 Hz, 1H), 4.24 (q,  $J$  = 7.1 Hz, 2H), 3.56 – 3.47 (m, 1H), 2.12 (ddd,  $J$  = 13.2, 3.3, 2.0 Hz, 1H), 2.02 (ddd,  $J$  = 13.1, 4.1, 2.3 Hz, 1H), 1.30 (t,  $J$  = 7.1 Hz, 3H) ppm. **<sup>13</sup>C NMR** (101 MHz, CDCl<sub>3</sub>)  $\delta$  162.1, 152.5, 141.8, 133.2, 127.9, 124.1, 121.4, 117.0, 114.5, 92.2, 61.5, 26.0, 24.7, 14.2 ppm. **HRMS**: [M+H]<sup>+</sup> *calcd.* For C<sub>14</sub>H<sub>14</sub>ClO<sub>4</sub><sup>+</sup> 281.0575, found 281.0579. **[ $\alpha$ ]<sub>D</sub><sup>20</sup>** 56.36 ( $c$  = 0.51 in CHCl<sub>3</sub>). The enantiomeric excess was determined by HPLC analysis on Daicel Chiralpak IB column [*n*-hexane/*i*-PrOH = 80/20, 1 mL/min],  $\lambda$  = 204 nm,  $t_{major}$  = 7.28 min,  $t_{minor}$  = 6.83 min, **ee** = **85%**. The diastereomeric ratio was determined by NMR ***dr*** >**20:1**.

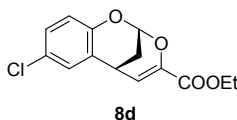

**8d** was obtained as a colorless oil 12 mg in 21% yield for three steps after column chromatography on silica gel (petroleum ether/ethyl acetate = 10/1). **<sup>1</sup>H NMR** (400 MHz, CDCl<sub>3</sub>)  $\delta$  7.13 – 7.04 (m, 2H), 6.87 (d,  $J$  = 8.3 Hz, 1H), 6.38 (dd,  $J$  = 7.1, 1.5 Hz, 1H), 6.15 (dd,  $J$  = 3.8, 1.9 Hz, 1H), 4.24 (q,  $J$  = 7.1 Hz, 2H), 3.54 – 3.46 (m, 1H), 2.11 (ddd,  $J$  = 13.2, 3.2, 2.0 Hz, 1H), 2.02 (ddd,  $J$  = 13.2, 4.1, 2.2 Hz, 1H), 1.30 (t,  $J$  = 7.1 Hz, 3H) ppm. **<sup>13</sup>C NMR** (101 MHz, CDCl<sub>3</sub>)  $\delta$  162.1, 150.5, 142.1, 139.7, 128.0, 127.0, 125.9, 117.9, 114.2, 92.3, 61.5, 26.3, 24.5, 14.2 ppm. **HRMS**: [M+H]<sup>+</sup> *calcd.* For C<sub>14</sub>H<sub>14</sub>ClO<sub>4</sub><sup>+</sup> 281.0575, found 281.0570. **[ $\alpha$ ]<sub>D</sub><sup>20</sup>** 164.42 ( $c$  = 0.47 in CHCl<sub>3</sub>). The enantiomeric excess was determined by HPLC analysis on Daicel Chiralpak IA column [*n*-hexane/*i*-PrOH = 80/20, 1 mL/min],  $\lambda$  = 230 nm,  $t_{major}$  = 7.39 min,  $t_{minor}$  = 6.54 min, **ee** = **91%**. The diastereomeric ratio was determined by NMR ***dr*** >**20:1**.

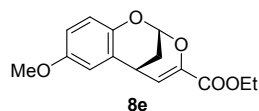

**8e** was obtained as a colorless oil 26.4mg in 48% yield for three steps after column chromatography on silica gel (petroleum ether/ethyl acetate = 10/1). **<sup>1</sup>H NMR** (400 MHz, CDCl<sub>3</sub>)  $\delta$  6.86 (d,  $J$  = 8.8 Hz, 1H), 6.69 (dd,  $J$  = 8.8, 3.0 Hz, 1H), 6.63 (d,  $J$  = 3.0 Hz, 1H), 6.40 (dd,  $J$  = 7.1, 1.4 Hz, 1H), 6.13 (q,  $J$  = 2.0 Hz, 1H), 4.23 (q,  $J$  = 7.1 Hz, 2H), 3.75 (s, 3H), 3.47 (ddd,  $J$  = 7.2, 4.6, 2.7 Hz, 1H), 2.15 – 1.97 (m, 2H), 1.29 (t,  $J$  = 7.1 Hz, 3H) ppm. **<sup>13</sup>C NMR** (101 MHz, CDCl<sub>3</sub>)  $\delta$  162.4, 153.8, 145.6, 142.0, 126.1, 117.1, 114.6, 113.4, 112.4, 92.4, 61.4, 55.8, 26.8, 24.8, 14.2 ppm. **HRMS**: [M+H]<sup>+</sup> *calcd.* For C<sub>15</sub>H<sub>17</sub>O<sub>5</sub><sup>+</sup> 277.1071, found 277.1067. [ $\alpha$ ]<sub>D</sub><sup>20</sup> 136.94 ( $c$  = 1.10 in CHCl<sub>3</sub>). The enantiomeric excess was determined by HPLC analysis on Daicel Chiralpak IA column [*n*-hexane/*i*-PrOH = 80/20, 1 mL/min],  $\lambda$  = 230 nm,  $t_{major}$  = 8.84 min,  $t_{minor}$  = 7.74 min, **ee** = **92%**. The diastereomeric ratio was determined by NMR **dr** >**20:1**.

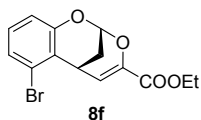

**8f** was obtained as a colorless oil 28.4 mg in 44% yield for three steps after column chromatography on silica gel (petroleum ether/ethyl acetate = 20/1-15/1). **<sup>1</sup>H NMR** (400 MHz, CDCl<sub>3</sub>)  $\delta$  7.14 (dd,  $J$  = 7.9, 1.1 Hz, 1H), 6.99 (t,  $J$  = 8.1 Hz, 1H), 6.90 (d,  $J$  = 8.1 Hz, 1H), 6.47 (dd,  $J$  = 7.2, 1.5 Hz, 1H), 6.15 (dd,  $J$  = 3.9, 2.0 Hz, 1H), 4.35 – 4.16 (m, 2H), 4.00 (ddd,  $J$  = 7.3, 4.6, 2.8 Hz, 1H), 2.12 (ddd,  $J$  = 13.2, 3.3, 2.1 Hz, 1H), 2.01 (ddd,  $J$  = 13.2, 4.1, 2.3 Hz, 1H), 1.30 (t,  $J$  = 7.1 Hz, 3H) ppm. **<sup>13</sup>C NMR** (101 MHz, CDCl<sub>3</sub>)  $\delta$  162.1, 153.1, 142.6, 128.6, 125.6, 124.9, 122.3, 116.0, 113.1, 92.3, 61.5, 25.9, 24.6, 14.2 ppm. **HRMS**: [M+H]<sup>+</sup> *calcd.* For C<sub>14</sub>H<sub>14</sub>BrO<sub>4</sub><sup>+</sup> 325.0070, found 325.0071. [ $\alpha$ ]<sub>D</sub><sup>20</sup> 149.82 ( $c$  = 1.08 in CHCl<sub>3</sub>). The enantiomeric excess was determined by HPLC analysis on Daicel Chiralpak IA column [*n*-hexane/*i*-PrOH = 90/10, 1 mL/min],  $\lambda$  = 204 nm,  $t_{major}$  = 9.35 min,  $t_{minor}$  = 8.43 min, **ee** = **90%**. The diastereomeric ratio was determined by NMR **dr** >**20:1**.

## F. Other reactions

### F1. Synthesis of 13

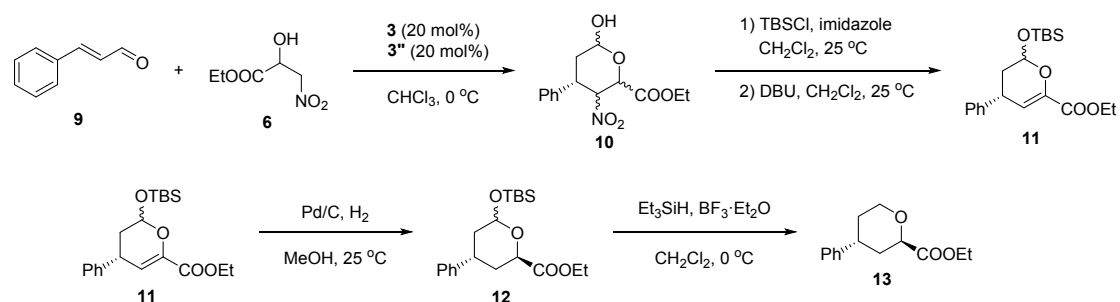

A glass vial equipped with a magnetic stirring bar was charged with ethyl 2-hydroxy-3-nitropropanoate **6** (0.20 mmol, 1.0 equiv.), cinnamaldehyde **9** (0.24 mmol, 1.2 equiv.), **3** (0.04 mmol, 0.2 equiv.) and **3''** (0.04 mmol, 0.2 equiv.) in CHCl<sub>3</sub> (1 mL) at 0 °C. The resulting reaction mixture was kept under vigorous stirring until the consumption of **6** (monitored by TLC analysis). After completion of the reaction, the residue was purified by flash chromatography on silica gel (petroleum ether/ethyl acetate = 3/1 to 1.5/1) to afford **10** as intermediate.

Compound **10** (1.0 equiv.) was dissolved in CH<sub>2</sub>Cl<sub>2</sub> (0.10 mmol in 0.5 mL). Imidazole (3.0 equiv.) and TBSCl (2.0 equiv.) were added to the reaction mixture at 0 °C and the reaction was kept at 25 °C until the consumption of **10**. After full conversion of the second step, the residue was purified by flash chromatography on silica gel (petroleum ether/ethyl acetate = 10/1) to give the intermediate. The intermediate (1.0 equiv) was dissolved in CH<sub>2</sub>Cl<sub>2</sub> (0.10 mmol in 0.5 mL) at 25 °C and DBU (1.2 equiv.) was added to the reaction mixture. After full conversion of the third step, the residue was purified by flash chromatography on silica gel (petroleum ether/ethyl acetate = 100/1) to give product **11**.

Hydrogenate a solution of **11** (57 mg, 0.16 mmol) in MeOH (2 mL) at atmospheric pressure using 10% Pd/C (6 mg) as the catalyst. And the reaction mixture was stirred at 25 °C. After completion of the reaction, filter the catalyst and the solvent was

removed under vacuum. The product was purified by column chromatography on a silica gel (petroleum ether/ethyl acetate = 100/1-60/1) to afford the desired product **12**. To a solution of **12** (0.065 mmol, 1.0 equiv.) and triethylsilane (0.20 mmol, 3.0 equiv.) in anhydrous CH<sub>2</sub>Cl<sub>2</sub> (0.5 mL) was added BF<sub>3</sub>·Et<sub>2</sub>O (0.1 mmol, 1.5 equiv.) at 0 °C. The reaction was stirred at 0 °C for 1 h. The product was purified by column chromatography on a silica gel (petroleum ether/ethyl acetate = 10/1) to afford the desired product **13** for NMR and HPLC analysis.

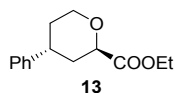

**13** was obtained as a colorless oil 12 mg in 26% yield for five steps after column chromatography on silica gel (petroleum ether/ethyl acetate = 10/1). **<sup>1</sup>H NMR** (400 MHz, CDCl<sub>3</sub>)  $\delta$  7.38 – 7.29 (m, 2H), 7.23 (dd,  $J$  = 10.3, 4.6 Hz, 3H), 4.33 – 4.19 (m, 3H), 4.11 (dd,  $J$  = 11.7, 2.3 Hz, 1H), 3.63 (td,  $J$  = 11.8, 2.5 Hz, 1H), 2.86 (tt,  $J$  = 12.1, 3.8 Hz, 1H), 2.20 (ddt,  $J$  = 13.1, 3.8, 2.1 Hz, 1H), 1.88 (dtd,  $J$  = 16.4, 12.1, 4.5 Hz, 1H), 1.82 – 1.69 (m, 2H), 1.28 (t,  $J$  = 7.1 Hz, 3H) ppm. **<sup>13</sup>C NMR** (101 MHz, CDCl<sub>3</sub>)  $\delta$  171.3, 144.7, 128.7, 126.7, 126.7, 76.6, 68.3, 61.2, 41.5, 36.3, 32.6, 14.2 ppm. **HRMS**: [M+H]<sup>+</sup> *calcd.* For C<sub>14</sub>H<sub>19</sub>O<sub>3</sub><sup>+</sup> 235.1329, found 235.1326. **[ $\alpha$ ]<sub>D</sub><sup>20</sup>** -83.28 ( $c$  = 0.42 in CHCl<sub>3</sub>). The enantiomeric excess was determined by HPLC analysis on Daicel Chiralpak IC column [*n*-hexane/*i*-PrOH = 90/10, 1 mL/min],  $\lambda$  = 210 nm,  $t_{major}$  = 19.83 min,  $t_{minor}$  = 17.89 min, **ee** = **95%**. The diastereomeric ratio was determined by NMR ***dr* >20:1**.

## F2. Synthesis of 16

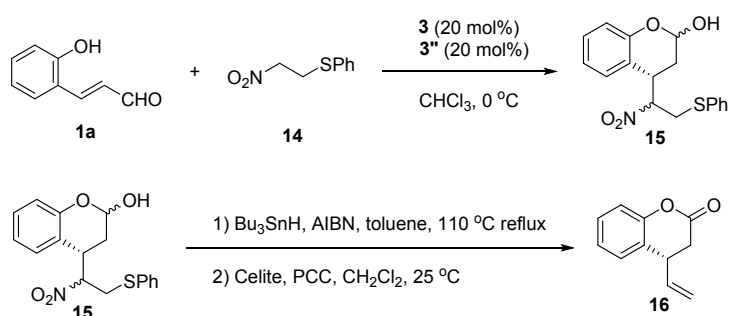

A glass vial equipped with a magnetic stirring bar was charged with (2-nitroethyl) (phenyl) sulfane **14** (0.24 mmol, 1.2 equiv.), 2-hydroxycinnamaldehyde **1a** (0.20 mmol, 1.0 equiv.), **3** (0.04 mmol, 0.2 equiv.) and **3''** (0.04 mmol, 0.2 equiv.) in  $\text{CHCl}_3$  (0.5 mL) at  $0\text{ }^\circ\text{C}$ . The resulting reaction mixture was kept under vigorous stirring until the consumption of **1a** (monitored by TLC analysis). After completion of the reaction, the residue was purified by flash chromatography on silica gel (petroleum ether/ethyl acetate = 8/1 to 5/1) to afford **15** as intermediate.

Then, compound **15** (1.0 equiv.) was dissolved in toluene (0.10 mmol in 1.0 mL). AIBN (1.0 equiv.),  $\text{Bu}_3\text{SnH}$  (3.5 equiv.) were added to the reaction mixture and the resulting reaction mixture was kept under vigorous stirring at  $110\text{ }^\circ\text{C}$  until the consumption of **15** (monitored by TLC analysis). After full conversion of the second step, the residue was purified by flash chromatography on silica gel (petroleum ether/ethyl acetate = 20/1) to get the intermediate. At last, the intermediate (1.0 equiv.) was dissolved in  $\text{CH}_2\text{Cl}_2$  (0.10 mmol in 0.5 mL) at  $25\text{ }^\circ\text{C}$ . Celite and PCC (3.0 equiv.) were added to the reaction mixture. After full conversion of the third step, the residue was purified by flash chromatography on silica gel (petroleum ether/ethyl acetate = 25/1) to give product **16** for NMR and HPLC analysis.



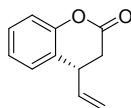

16

**16** was obtained as a colorless oil 6.8 mg in 20% yield for three steps after column chromatography on silica gel (petroleum ether/ethyl acetate = 25/1). **<sup>1</sup>H NMR** (400 MHz, CDCl<sub>3</sub>)  $\delta$  7.29 (td,  $J = 7.8, 1.6$  Hz, 1H), 7.21 (d,  $J = 6.3$  Hz, 1H), 7.14 (td,  $J = 7.5, 1.1$  Hz, 1H), 7.08 (d,  $J = 8.1$  Hz, 1H), 5.85 (ddd,  $J = 17.1, 10.2, 6.9$  Hz, 1H), 5.24 (d,  $J = 10.2$  Hz, 1H), 5.11 (d,  $J = 17.1$  Hz, 1H), 3.74 (q,  $J = 6.6$  Hz, 1H), 2.89 (dd,  $J = 15.8, 5.8$  Hz, 1H), 2.78 (dd,  $J = 15.8, 7.2$  Hz, 1H) ppm. **<sup>13</sup>C NMR** (101 MHz, CDCl<sub>3</sub>)  $\delta$  167.7, 151.4, 136.8, 128.8, 127.7, 124.6, 124.6, 117.8, 117.1, 38.8, 34.9 ppm. **HRMS**: [M+H]<sup>+</sup> *calcd.* For C<sub>11</sub>H<sub>11</sub>O<sub>2</sub><sup>+</sup> 175.0754, found 175.0757. **[ $\alpha$ ]<sub>D</sub><sup>20</sup>** -57.42 ( $c = 0.56$  in CHCl<sub>3</sub>). The enantiomeric excess was determined by HPLC analysis on Daicel Chiralpak AD-H column [*n*-hexane/*i*-PrOH = 98/2, 1 mL/min],  $\lambda = 204$  nm,  $t_{major} = 10.18$  min,  $t_{minor} = 9.35$  min, **ee = 97%**. The diastereomeric ratio was determined by NMR ***dr* >20:1**.

### F3. Synthesis of 19

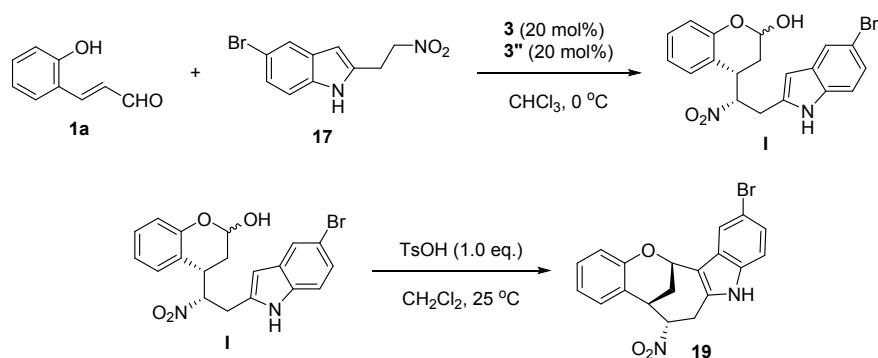

A glass vial equipped with a magnetic stirring bar was charged with 5-bromo-2-(2-nitroethyl)-1H-indole **17** (0.20 mmol, 1.0 equiv.), 2-hydroxycinnamaldehyde **1a** (0.24 mmol, 1.2 equiv.), **3** (0.04 mmol, 0.2 equiv.) and **3''** (0.04 mmol, 0.2 equiv.) in  $\text{CHCl}_3$  (0.5 mL) at  $0\text{ }^\circ\text{C}$ . The resulting reaction mixture was kept under vigorous stirring until the consumption of **17** (monitored by TLC analysis). After completion of the reaction, the residue was purified by flash chromatography on silica gel (petroleum ether/ethyl acetate = 3/1 to 2/1) to afford **I** as intermediate. Then, compound **I** (1.0 equiv.) was dissolved in anhydrous  $\text{CH}_2\text{Cl}_2$  (0.10 mmol in 0.5 mL) at  $25\text{ }^\circ\text{C}$  and  $p\text{-TsOH}$  (1.0 equiv.) was added to the reaction mixture. After full conversion of the second step, the residue was purified by flash chromatography on silica gel (petroleum ether/ethyl acetate = 10/1) to give product **19** for NMR and HPLC analysis.

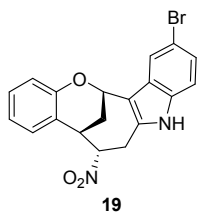

**19** was obtained as a yellow solid 15.4 mg in 19% yield for two steps after column chromatography on silica gel (petroleum ether/ethyl acetate = 10/1). **<sup>1</sup>H NMR** (400 MHz, CDCl<sub>3</sub>)  $\delta$  7.91 (s, 1H), 7.84 (d,  $J$  = 1.4 Hz, 1H), 7.28 (dd,  $J$  = 8.6, 1.7 Hz, 1H), 7.15 (dd,  $J$  = 12.0, 5.1 Hz, 2H), 6.85 (t,  $J$  = 7.4 Hz, 1H), 6.80 (dd,  $J$  = 7.7, 1.5 Hz, 1H), 6.76 (d,  $J$  = 8.2 Hz, 1H), 5.74 (d,  $J$  = 4.8 Hz, 1H), 4.91 – 4.80 (m, 1H), 4.31 (d,  $J$  = 6.8 Hz, 1H), 3.36 (dd,  $J$  = 15.7, 12.5 Hz, 1H), 3.19 (dd,  $J$  = 15.7, 2.6 Hz, 1H), 2.88 (ddd,  $J$  = 14.2, 6.8, 5.4 Hz, 1H), 2.38 (d,  $J$  = 14.3 Hz, 1H) ppm. **<sup>13</sup>C NMR** (101 MHz, CDCl<sub>3</sub>)  $\delta$  154.7, 154.2, 133.2, 130.5, 130.1, 129.6, 129.5, 125.5, 120.6, 120.4, 118.1, 117.0, 113.9, 112.1, 86.8, 65.1, 37.4, 30.9, 28.2 ppm. **HRMS**: [M+H]<sup>+</sup> *calcd.* For C<sub>19</sub>H<sub>16</sub>BrN<sub>2</sub>O<sub>3</sub><sup>+</sup> 399.0339, found 399.0341. **[ $\alpha$ ]<sub>D</sub><sup>20</sup>** 159.63 ( $c$  = 0.67 in CHCl<sub>3</sub>). The enantiomeric excess was determined by HPLC analysis on Daicel Chiralpak IC column [*n*-hexane/*i*-PrOH = 90/10, 1 mL/min],  $\lambda$  = 230 nm,  $t_{major}$  = 7.55 min,  $t_{minor}$  = 6.43 min, **ee** = **98%**. The diastereomeric ratio was determined by NMR ***dr*** >**20:1**.

#### F4. Synthesis of **20**

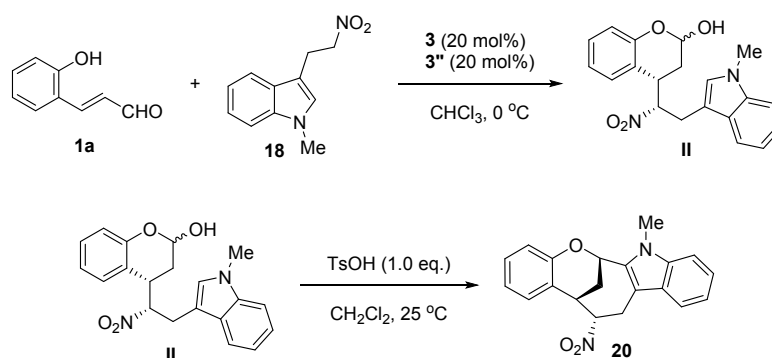

A glass vial equipped with a magnetic stirring bar was charged with 5-bromo-2-(2-nitroethyl)-1H-indole **18** (0.20 mmol, 1.0 equiv.), 2-hydroxycinnamaldehyde **1a** (0.24 mmol, 1.2 equiv.), **3** (0.04 mmol, 0.2 equiv.) and **3''** (0.04 mmol, 0.2 equiv.) in  $\text{CHCl}_3$  (0.5 mL) at  $0\text{ }^\circ\text{C}$ . The resulting reaction mixture was kept under vigorous stirring until the consumption of **18** (monitored by TLC analysis). After completion of the reaction, the residue was purified by flash chromatography on silica gel (petroleum ether/ethyl acetate = 5/1 to 3/1) to afford **II** as intermediate. Then, compound **II** (1.0 equiv.) was dissolved in anhydrous  $\text{CH}_2\text{Cl}_2$  (0.10 mmol in 0.5 mL) at  $25\text{ }^\circ\text{C}$  and  $p\text{-TsOH}$  (1.0 equiv.) was added to the reaction mixture. After full conversion of the second step, the residue was purified by flash chromatography on silica gel (petroleum ether/ethyl acetate = 40/1) to give product **20** for NMR and HPLC analysis.

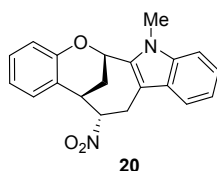

**20** was obtained as a yellow solid 17.8 mg in 27% yield for two steps after column chromatography on silica gel (petroleum ether/ethyl acetate = 40/1). **<sup>1</sup>H NMR** (400 MHz, CDCl<sub>3</sub>)  $\delta$  7.50 (d,  $J$  = 8.0 Hz, 1H), 7.29 – 7.21 (m, 3H), 7.14 – 7.04 (m, 2H), 6.90 (dd,  $J$  = 10.8, 4.2 Hz, 1H), 6.76 (d,  $J$  = 8.2 Hz, 1H), 5.79 (d,  $J$  = 3.3 Hz, 1H), 5.14 (ddd,  $J$  = 10.6, 5.2, 2.3 Hz, 1H), 3.86 (d,  $J$  = 8.6 Hz, 4H), 3.62 (dd,  $J$  = 15.2, 10.6 Hz, 1H), 3.52 (dd,  $J$  = 15.2, 5.2 Hz, 1H), 2.98 (d,  $J$  = 15.2 Hz, 1H), 2.69 (ddd,  $J$  = 15.2, 6.7, 4.8 Hz, 1H) ppm. **<sup>13</sup>C NMR** (101 MHz, CDCl<sub>3</sub>)  $\delta$  151.8, 137.1, 132.7, 129.4, 128.7, 126.4, 123.4, 122.8, 121.7, 119.5, 118.3, 117.7, 109.3, 107.5, 92.0, 67.5, 35.1, 30.2, 25.5, 25.3 ppm. **HRMS**: [M+H]<sup>+</sup> *calcd.* For C<sub>20</sub>H<sub>19</sub>N<sub>2</sub>O<sub>3</sub><sup>+</sup> 335.1390, found 335.1393. **[ $\alpha$ ]<sub>D</sub><sup>20</sup>** 151.39 ( $c$  = 0.83 in CHCl<sub>3</sub>). The enantiomeric excess was determined by HPLC analysis on Daicel Chiralpak IC column [*n*-hexane/*i*-PrOH = 90/10, 1 mL/min],  $\lambda$  = 230 nm,  $t_{major}$  = 10.39 min,  $t_{minor}$  = 9.61 min, **ee** = **98%**. The diastereomeric ratio was determined by NMR ***dr*** >**20:1**.

## G. Synthetic transformation

### (2*R*,2'*S*,6'*S*)-4'*H*,6'*H*-spiro[pyrrolidine-2,5'-[2,6]methanobenzo[*d*][1,3]dioxocin]-5-one (**22**)

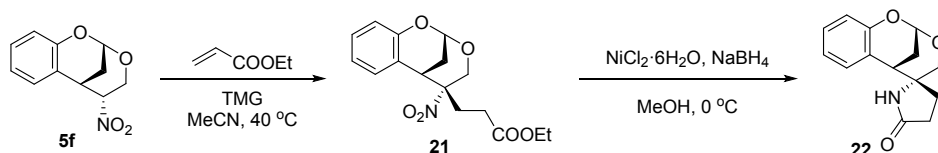

To a solution of **5f** (44 mg, 0.2 mmol) and ethyl acrylate (43  $\mu$ L, 0.4 mmol) in anhydrous MeCN (1.0 mL) was added tetramethylguanidine (25  $\mu$ L, 0.2 mmol) at room temperature. The reaction was stirred at 40 °C for 24 h before the solvent was removed under vacuum. The product was purified by column chromatography on a silica gel (petroleum ether/ethyl acetate = 15/1) to afford the desired product **21** as a colorless oil (52 mg, 81% yield). To a suspension of **21** (52 mg, 0.162 mmol) and NiCl $\cdot$ 6H $_2$ O (46 mg, 0.19 mmol) in methanol (1.5 mL) was added NaBH $_4$  (92 mg, 2.43 mmol) at 0 °C and the mixture was stirred at 0 °C for 1 h, after which the mixture was quenched with sat. NH $_4$ Cl at 0 °C and extracted with CH $_2$ Cl $_2$ . The combined organic layers were dried over anhydrous Na $_2$ SO $_4$  and the solvent was evaporated. The product was purified by column chromatography on a silica gel (petroleum ether/ethyl acetate = 2/1 to CH $_2$ Cl $_2$ /MeOH = 20/1) to afford the desired product **22** as a white solid (39.5 mg, 99% yield).  $^1\text{H NMR}$  (600 MHz, CDCl $_3$ )  $\delta$  7.24 (t,  $J$  = 7.7 Hz), 7.05 (d,  $J$  = 7.2 Hz), 6.92 (t,  $J$  = 7.8 Hz), 5.53 (s), 5.20 (s), 3.42 (d,  $J$  = 11.8 Hz), 3.31 (d,  $J$  = 11.7 Hz), 2.86 (s), 2.56 – 2.42 (m), 2.28 (d,  $J$  = 13.4 Hz), 2.11 – 2.01 (m), 1.92 (d,  $J$  = 13.1 Hz) ppm.  $^{13}\text{C NMR}$  (151 MHz, CDCl $_3$ )  $\delta$  176.4, 155.0, 129.5, 129.2, 122.3, 121.2, 116.0, 91.7, 64.8, 59.0, 40.0, 30.2, 29.8, 26.3 ppm. **HRMS**: [M+H] $^+$  *calcd.* For C $_{14}$ H $_{16}$ NO $_3^+$  246.1125, found 246.1121.  $[\alpha]_D^{20}$  -36.86 ( $c$  = 1.67 in CHCl $_3$ ). The enantiomeric excess was determined by HPLC analysis on Daicel Chiralpak AD-H column [ $n$ -hexane/ $i$ -PrOH = 80/20, 1 mL/min],  $\lambda$  = 210 nm,  $t_{\text{major}}$  = 9.93 min,  $t_{\text{minor}}$  = 9.11 min, **ee** = **89%**. The diastereomeric ratio was determined by  $^1\text{H NMR}$ , **dr** >**20:1**.

**(2'*R*,6'*S*)-spiro[cyclopentane-1,4']-[2,6]methanobenzo[*d*][1,3]dioxocin]-5'(6'*H*)-on**  
**(23)**

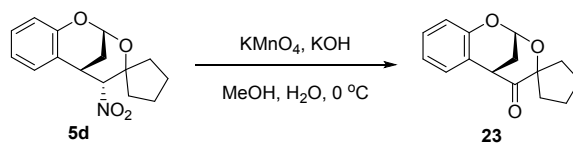

To a suspension of **5d** (34.6 mg, 0.12 mmol) and KOH (8.4 mg, 0.14 mmol) in methanol (0.5 mL) was added KMnO<sub>4</sub> (15.8 mg, 0.1 mmol) in H<sub>2</sub>O (0.5 mL) at 0 °C. The reaction was stirred at 0 °C for 10 minutes, after which the mixture was quenched with sat. NH<sub>4</sub>Cl at 0 °C and extracted with CH<sub>2</sub>Cl<sub>2</sub>. The combined organic layers were dried over anhydrous Na<sub>2</sub>SO<sub>4</sub> and the solvent was evaporated. The residue was purified by column chromatography on a silica gel (petroleum ether/ethyl acetate = 30/1) to afford the desired product **23** as a white solid (20.8 mg, 71% yield). **<sup>1</sup>H NMR** (400 MHz, CDCl<sub>3</sub>) δ 7.26 – 7.20 (m, 1H), 7.19 – 7.12 (m, 1H), 6.92 (t, *J* = 7.0 Hz, 2H), 5.83 (d, *J* = 1.5 Hz, 1H), 3.74 (s, 1H), 2.46 (dt, *J* = 13.6, 2.5 Hz, 1H), 2.33 (ddd, *J* = 13.6, 3.3, 1.9 Hz, 1H), 2.23 – 2.08 (m, 1H), 1.91 – 1.65 (m, 4H), 1.63 – 1.47 (m, 3H) ppm. **<sup>13</sup>C NMR** (101 MHz, CDCl<sub>3</sub>) δ 209.1, 152.3, 129.6, 128.9, 121.6, 118.3, 116.9, 91.6, 89.3, 43.5, 41.9, 41.0, 26.5, 25.5, 25.3 ppm. **HRMS**: [M-H]<sup>-</sup> *calcd.* For C<sub>15</sub>H<sub>17</sub>O<sub>3</sub><sup>+</sup> 245.1172, found 245.1178. [α]<sub>D</sub><sup>20</sup> -242.99 (*c* = 0.74 in CHCl<sub>3</sub>). The enantiomeric excess was determined by HPLC analysis on Daicel Chiralpak Chiral-MJ (2) column [*n*-hexane/*i*-PrOH = 90/10, 1 mL/min], λ = 210 nm, *t*<sub>major</sub> = 9.66 min, *t*<sub>minor</sub> = 7.66 min, **ee** = **88%**. The diastereomeric ratio was determined by <sup>1</sup>H NMR, ***dr*** **>20:1**.

**(2'*R*,5'*S*,6'*S*)-5'-nitro-7'-phenyl-5',6'-dihydrospiro[cyclopentane-1,4'-[2,6]methanobenzo[*d*][1,3]dioxocine] (24)**

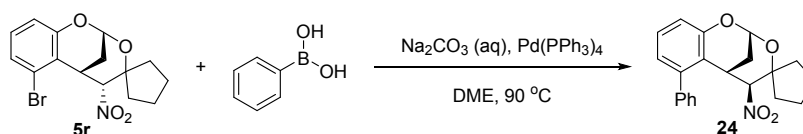

In a glass vial equipped with a magnetic stirring bar, the **5r** (35.4 mg, 0.1 mmol), phenylboronic acid (18.3 mg, 0.15 mmol) and  $\text{Pd}(\text{PPh}_3)_4$  (5.8 mg, 0.005 mmol) in DME (0.5 mL) were added. Aqueous  $\text{Na}_2\text{CO}_3$  (0.52 mmol, 2 M, 0.26 mL) was added under nitrogen atmosphere. The resulting mixture was stirred at room temperature for 15 min and then at 90 °C for another 12 h. After being cooled to room temperature, the solvent was removed under vacuum and the residue was extracted with  $\text{CH}_2\text{Cl}_2$ . The combined organic layers were dried over anhydrous  $\text{Na}_2\text{SO}_4$  and the solvent was evaporated. The crude product was purified by column chromatography on silica gel (petroleum ether/ethyl acetate = 100/1) to afford the desired product **24** as a white solid (16.7 mg, 48% yield).  $^1\text{H NMR}$  (400 MHz,  $\text{CDCl}_3$ )  $\delta$  7.51 – 7.40 (m, 3H), 7.33 – 7.23 (m, 3H), 6.90 (t,  $J = 7.3$  Hz, 2H), 5.80 (s, 1H), 4.58 (s, 1H), 3.93 (s, 1H), 3.57 (s, 1H), 2.82 (dt,  $J = 13.6, 2.7$  Hz, 1H), 1.94 – 1.84 (m, 2H), 1.82 – 1.66 (m, 3H), 1.59 – 1.44 (m, 3H), 1.17 – 1.04 (m, 1H) ppm.  $^{13}\text{C NMR}$  (101 MHz,  $\text{CDCl}_3$ )  $\delta$  153.7, 142.4, 139.1, 129.1, 128.7, 128.7, 127.9, 122.6, 120.2, 116.0, 92.3, 90.8, 80.6, 40.6, 39.6, 28.7, 25.0, 22.7, 22.7 ppm. **HRMS**:  $[\text{M}-\text{H}]^-$  *calcd.* For  $\text{C}_{21}\text{H}_{20}\text{NO}_4^-$  350.1398, found 350.1401.  $[\alpha]_{\text{D}}^{20}$  106.14 ( $c = 0.83$  in  $\text{CHCl}_3$ ). The enantiomeric excess was determined by HPLC analysis on Daicel Chiralpak IB column [ $n$ -hexane/*i*-PrOH = 98/2, 1 mL/min],  $\lambda = 204$  nm,  $t_{\text{major}} = 5.94$  min,  $t_{\text{minor}} = 5.34$  min, **ee = 92%**. The diastereomeric ratio was determined by  $^1\text{H NMR}$ , ***dr* = 12.5:1**.



The absolute configuration of the nitro stereocenter in compound **24** was confirmed by the following method. First, following the general procedure, product **5v** was obtained by the reaction of **1v** and **2d**. It was found that compounds **5v** and **24** showed different TLC behaviour, which indicated that these two compounds are diastereoisomers. Then, the relative configuration of **5v** was confirmed by NOESY, which was matched with the configuration of **5k**.

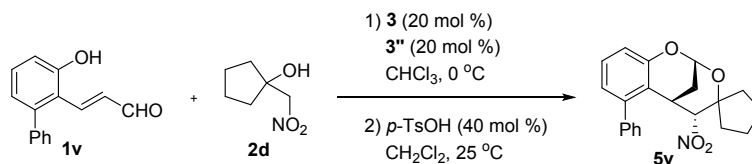

The NOSEY spectrum of 5v (500 MHz, CDCl<sub>3</sub>)

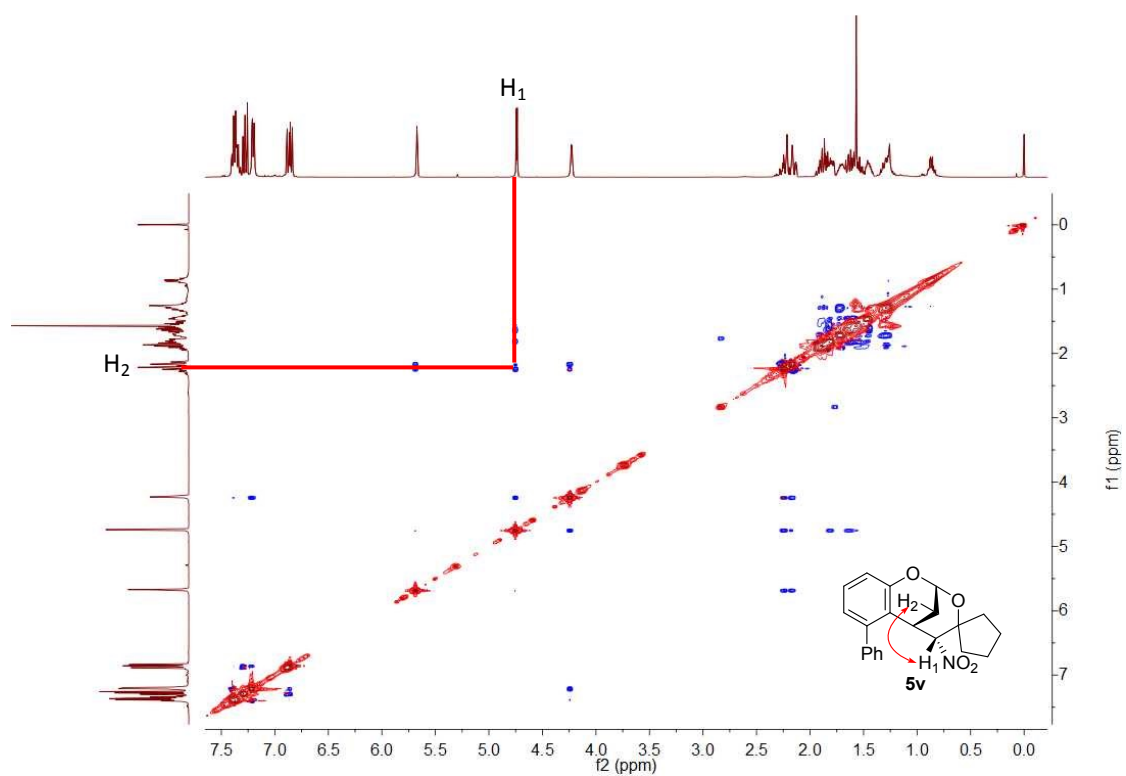

The NOSEY spectrum of 24 (500 MHz, CDCl<sub>3</sub>)

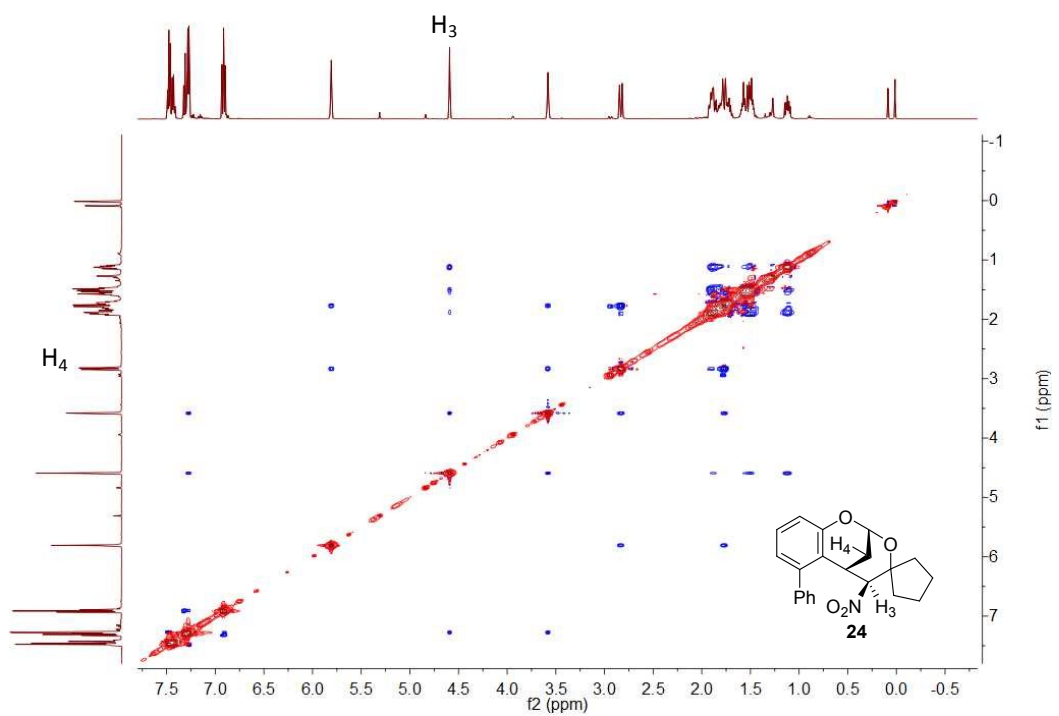

**(2'S,6'S)-5',6'-dihydrospiro[cyclohexane-1,4'-[2,6]methanobenzo[d][1,3]dioxocine]**  
**(25)**

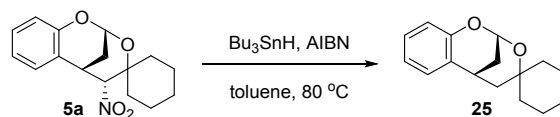

To a solution of **5a** (40 mg, 0.14 mmol) and Tributyltin Hydride (48  $\mu$ L, 0.18 mmol) in toluene (1 mL) was added AIBN (4.5 mg, 0.028 mmol) at room temperature. The reaction was stirred at 80 °C for 7 hours before the solvent was removed under vacuum. The product was purified by column chromatography on a silica gel (petroleum ether/ethyl acetate = 100/1-60/1) to afford the desired product **25** as a brown oil (20 mg, 59% yield).  $^1\text{H NMR}$  (400 MHz,  $\text{CDCl}_3$ )  $\delta$  7.24 – 7.18 (m, 1H), 7.15 (dd,  $J$  = 7.9, 1.4 Hz, 1H), 6.97 – 6.85 (m, 2H), 5.92 (d,  $J$  = 1.6 Hz, 1H), 3.69 (s, 1H), 2.41 (dt,  $J$  = 13.7, 2.5 Hz, 1H), 2.31 (ddd,  $J$  = 13.7, 3.3, 2.0 Hz, 1H), 1.76 (dd,  $J$  = 14.3, 3.7 Hz, 1H), 1.70 – 1.60 (m, 4H), 1.58 – 1.51 (m, 1H), 1.46 – 1.32 (m, 2H), 1.31 – 1.04 (m, 3H), 0.92 – 0.79 (m, 1H) ppm.  $^{13}\text{C NMR}$  (101 MHz,  $\text{CDCl}_3$ )  $\delta$  208.9, 152.3, 129.6, 129.0, 121.5, 118.2, 117.1, 91.4, 81.0, 43.2, 36.9, 35.7, 25.8, 24.8, 20.9, 20.6 ppm. **HRMS**:  $[\text{M}+\text{H}]^+$  *calcd.* For  $\text{C}_{16}\text{H}_{21}\text{O}_2^+$  245.1536, found 245.1530.  $[\alpha]_{\text{D}}^{20}$  -144.38 ( $c$  = 1.48 in  $\text{CHCl}_3$ ). The enantiomeric excess was determined by HPLC analysis on Daicel Chiralpak IA column [ $n$ -hexane/ $i$ -PrOH = 98/2, 1 mL/min],  $\lambda$  = 204 nm,  $t_{\text{major}}$  = 6.67 min,  $t_{\text{minor}}$  = 5.77 min, **ee** = **85%**. The diastereomeric ratio was determined by  $^1\text{H NMR}$ , **dr** >**20:1**.

**ethyl (1a*R*,3*R*,9*S*,9a*R*)-9,9a-dihydro-1a*H*-3,9-methanobenzo[*d*]oxireno[2,3-*g*][1,3]dioxocine-1a-carboxylate (**26**)**

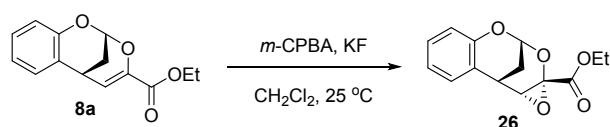

KF (35 mg, 0.6 mmol) was added to a solution of *m*-chloroperoxybenzoic acid (62 mg, 0.30 mmol) in anhydrous CH<sub>2</sub>Cl<sub>2</sub> (1.5 ml) and the suspension was maintained at room temperature with stirring. After 30 min **8a** (30 mg, 0.12 mmol) was added and the mixture was stirred for 5 days. The insoluble complexes were then filtered off, and the solvent was removed under vacuum. The product was purified by column chromatography on a silica gel (petroleum ether/ethyl acetate = 10/1) to afford the desired product **26** as a white solid (14 mg, 44% yield). <sup>1</sup>H NMR (400 MHz, CDCl<sub>3</sub>) δ 7.25 (td, *J* = 8.1, 1.5 Hz, 1H), 7.16 (dd, *J* = 7.4, 1.3 Hz, 1H), 6.99 – 6.92 (m, 2H), 5.64 (s, 1H), 4.25 – 4.15 (m, 2H), 3.73 (d, *J* = 1.5 Hz, 1H), 3.52 (d, *J* = 1.8 Hz, 1H), 2.58 – 2.48 (m, 1H), 1.81 – 1.72 (m, 1H), 1.26 (t, *J* = 7.1 Hz, 3H) ppm. <sup>13</sup>C NMR (101 MHz, CDCl<sub>3</sub>) δ 165.6, 152.3, 129.5, 128.3, 121.4, 121.3, 117.0, 91.4, 77.3, 62.7, 61.5, 28.2, 23.4, 14.0 ppm. HRMS: [M+Na]<sup>+</sup> *calcd.* For C<sub>14</sub>H<sub>14</sub>NaO<sub>5</sub><sup>+</sup> 285.0733, found 285.0729. [α]<sub>D</sub><sup>20</sup> 62.41 (*c* = 1.08 in CHCl<sub>3</sub>). The enantiomeric excess was determined by HPLC analysis on Daicel Chiralpak OD-H column [*n*-hexane/*i*-PrOH = 80/20, 1 mL/min], λ = 210 nm, *t*<sub>major</sub> = 10.12 min, *t*<sub>minor</sub> = 9.27 min, **ee** = **89%**. The diastereomeric ratio was determined by <sup>1</sup>H NMR, **dr** >**20:1**.

## 2-((9*S*,10*R*)-10-nitro-6-oxaspiro[4.5]decan-9-yl)phenol (**27**)

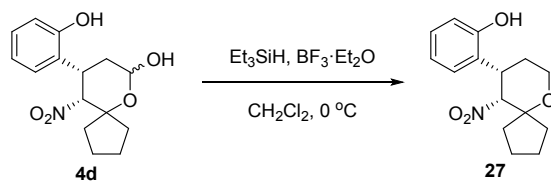

To a solution of **4d** (29.3 mg, 0.1 mmol) and triethylsilane (47.8  $\mu\text{L}$ , 0.3 mmol) in anhydrous  $\text{CH}_2\text{Cl}_2$  (1.0 mL) was added  $\text{BF}_3 \cdot \text{Et}_2\text{O}$  (18.5  $\mu\text{L}$ , 0.15 mmol) at 0  $^\circ\text{C}$ . The reaction was stirred at 0  $^\circ\text{C}$  for 1 h before the solvent was removed under vacuum. The product was purified by column chromatography on a silica gel (petroleum ether/ethyl acetate = 5/1) to afford the desired product **27** as a white solid (17.5 mg, 63% yield).  **$^1\text{H NMR}$**  (500 MHz, DMSO)  $\delta$  9.79 (s, 1H), 7.08 (t,  $J = 7.7$  Hz, 1H), 6.94 (d,  $J = 7.6$  Hz, 1H), 6.86 – 6.81 (m, 1H), 6.75 (t,  $J = 7.5$  Hz, 1H), 4.97 (d,  $J = 3.9$  Hz, 1H), 3.94 (dd,  $J = 11.8, 4.6$  Hz, 1H), 3.79 (td,  $J = 12.2, 2.2$  Hz, 1H), 3.72 (dt,  $J = 13.5, 3.9$  Hz, 1H), 3.35 (s, 1H), 2.69 (qd,  $J = 13.0, 5.2$  Hz, 1H), 2.32 – 2.22 (m, 1H), 1.81 – 1.71 (m, 1H), 1.70 – 1.57 (m, 4H), 1.54 – 1.46 (m, 1H), 1.41 (d,  $J = 12.9$  Hz, 1H) ppm.  **$^{13}\text{C NMR}$**  (125 MHz, DMSO)  $\delta$  154.8, 128.1, 126.6, 125.0, 119.1, 114.7, 89.8, 83.0, 61.0, 37.2, 33.8, 32.1, 23.8, 22.6, 22.3 ppm. **HRMS**:  $[\text{M}+\text{H}]^+$  *calcd.* For  $\text{C}_{15}\text{H}_{20}\text{NO}_4^+$  278.1387, found 278.1392.  $[\alpha]_{\text{D}}^{20}$  117.72 ( $c = 0.58$  in MeOH). The enantiomeric excess was determined by HPLC analysis on Daicel Chiralpak IC column [*n*-hexane/*i*-PrOH = 90/10, 1 mL/min],  $\lambda = 210$  nm,  $t_{\text{major}} = 7.82$  min,  $t_{\text{minor}} = 6.93$  min, **ee** = **97%**. The diastereomeric ratio was determined by  $^1\text{H NMR}$ , **dr** >**20:1**.

## H. Scale-up synthesis of **5d**

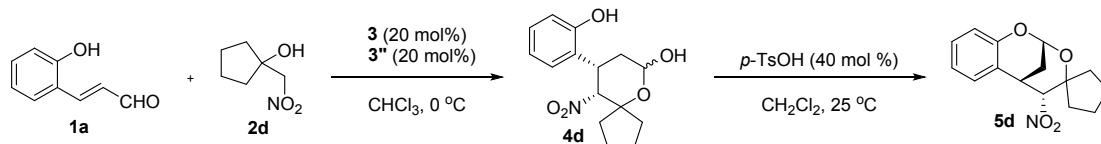

A glass vial equipped with a magnetic stirring bar was charged with 1-nitromethylcycloalcohol **2d** (290.3 mg, 2 mmol, 1.0 equiv.), 2-hydroxycinnamaldehyde **1a** (356 mg, 2.4 mmol, 1.2 equiv.), **3** (130 mg, 0.4 mmol, 0.2 equiv.) and **3''** (263mg, 0.4 mmol, 0.2 equiv.) in  $\text{CHCl}_3$  (5 mL) at  $0\text{ }^\circ\text{C}$ . The resulting reaction mixture was kept under vigorous stirring until the consumption of **2d** (monitored by TLC analysis). After completion of the reaction, the reaction mixture was concentrated and the residue was purified by flash chromatography on silica gel (petroleum ether/ethyl acetate = 4/1 to 3/1) to afford **4d** as a red solid (586 mg). Then the second step was performed. Compound **4d** (586 mg, 2 mmol, 1.0 equiv.) was dissolved in anhydrous  $\text{CH}_2\text{Cl}_2$  (10 mL) at  $25\text{ }^\circ\text{C}$  and  $p\text{-TsOH}$  (0.4 equiv.) was added to the reaction mixture. After full conversion of the second step, the reaction mixture was concentrated and the residue was purified by flash chromatography on silica gel (petroleum ether/ethyl acetate = 60/1 to 50/1) to give product **5d** (457 mg, 83% yield over two steps, 93% ee,  $dr >20:1$ ).

# I. NMR analysis and computational studies for the reaction pathway

## NMR analysis

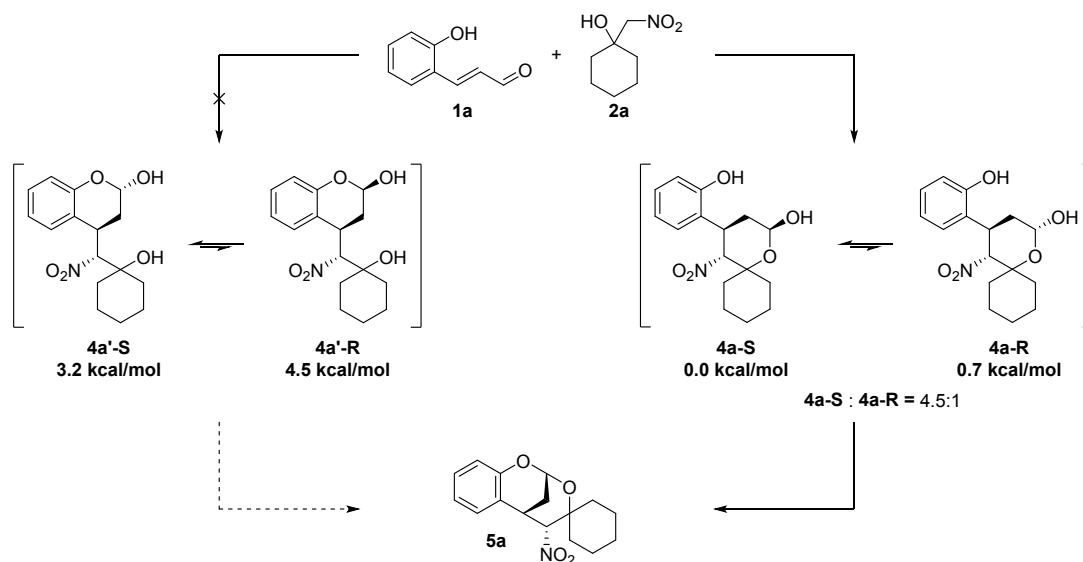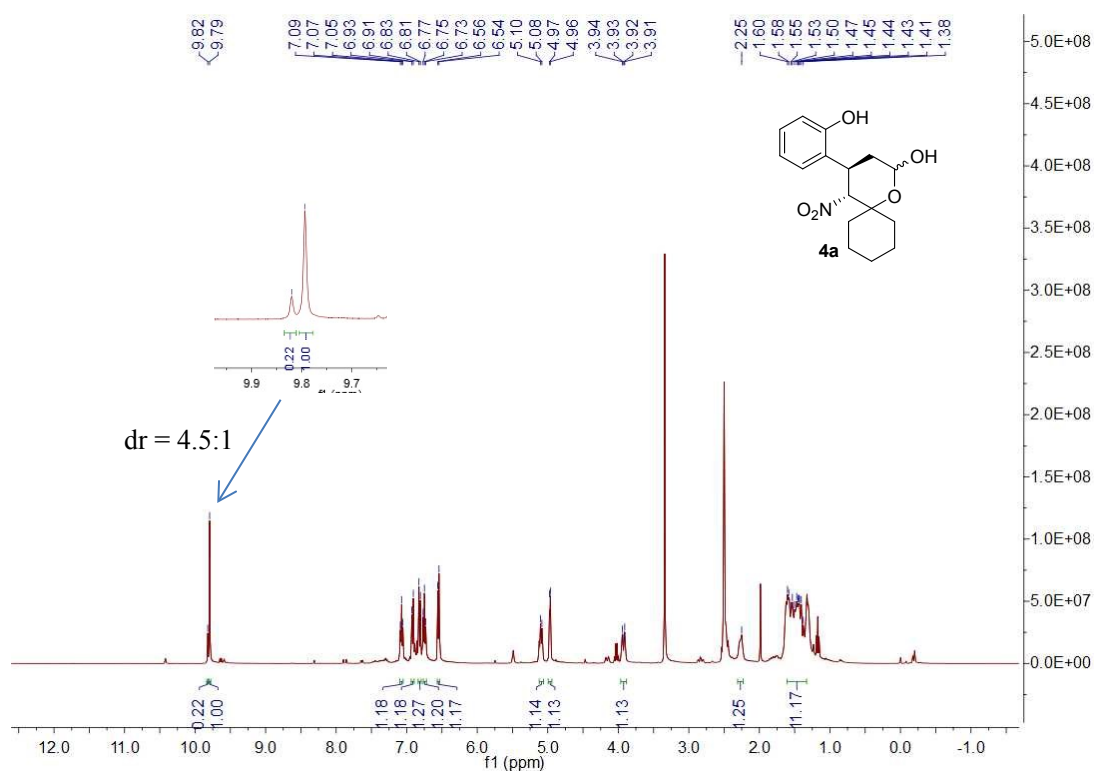

<sup>1</sup>H NMR (400 MHz, DMSO)  $\delta$  9.82 (s, 1H), 9.79 (s, 1H), 7.07 (t,  $J = 7.4$  Hz, 1H), 6.92 (d,  $J = 7.7$  Hz, 1H), 6.82 (d,  $J = 8.1$  Hz, 1H), 6.74 (d,  $J = 7.4$  Hz, 1H), 6.55 (d,  $J$

= 6.7 Hz, 1H), 5.09 (d,  $J = 7.8$  Hz, 1H), 4.97 (d,  $J = 4.0$  Hz, 1H), 3.93 (dd,  $J = 10.1$ , 3.7 Hz, 1H), 2.25 (s, 1H), 1.61 – 1.33 (m, 11H) ppm. **MS**:  $[M-H]^-$  *calcd.* For  $C_{16}H_{20}NO_5^-$  306.13, found 306.11.

### Computational details

In order to investigate the intermediates which formed through catalyzed Michael addition, the energies of different proposed structures were calculated with DFT computations. The DFT calculations were performed with Gaussian 09. Geometry optimizations were carried out at the B3LYP-D3 level of theory with the 6-31G(d) basis set. Vibrational frequencies were computed at the same level to verify that the optimized structures are local minimums and to evaluate zero-point vibrational energies (ZPVE) and thermal corrections at 298 K. Solvent effects in chloroform were evaluated at the more accurate B3LYP-D3/6-311+G(d,p) level with the SMD model.

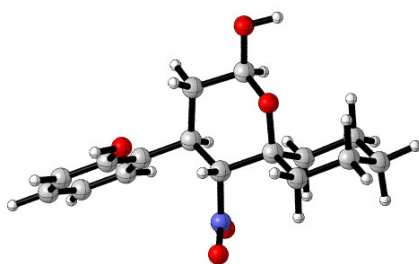

**Figure S1.** Lowest energy geometry of (2*S*,4*R*,5*R*)-4-(2-hydroxyphenyl)-5-nitro-1-oxaspiro[5.5]undecan-2-ol (**4a-S**)

$G$  (chloroform) = -1053.197097 Hartree

|   |          |           |           |
|---|----------|-----------|-----------|
| C | 3.717989 | -0.289194 | -1.301038 |
| C | 2.224055 | -0.625093 | -1.185718 |
| C | 1.653035 | -0.143962 | 0.167837  |
| C | 2.445075 | -0.790314 | 1.317717  |
| C | 3.948328 | -0.492533 | 1.211926  |
| C | 4.513906 | -0.920385 | -0.149628 |
| H | 2.087842 | -1.709676 | -1.253150 |
| H | 1.666982 | -0.201663 | -2.027212 |
| H | 3.847601 | 0.800797  | -1.280979 |
| H | 4.097616 | -0.639205 | -2.268562 |



|   |           |           |           |
|---|-----------|-----------|-----------|
| H | 2.270471  | -1.872237 | 1.298694  |
| H | 2.047734  | -0.415600 | 2.267788  |
| H | 4.479026  | -1.002562 | 2.025027  |
| H | 4.104154  | 0.583853  | 1.350874  |
| H | 4.461088  | -2.015763 | -0.237659 |
| H | 5.574290  | -0.648703 | -0.224364 |
| C | 0.120809  | -0.398641 | 0.338916  |
| H | -0.136683 | -0.218538 | 1.380877  |
| C | -0.367265 | 1.950734  | -0.382958 |
| C | -0.752591 | 0.471603  | -0.584950 |
| H | -0.514103 | 0.191359  | -1.615662 |
| C | -2.236756 | 0.213959  | -0.387146 |
| C | -3.005795 | -0.283923 | -1.443983 |
| C | -2.888668 | 0.446705  | 0.838838  |
| C | -4.372660 | -0.532030 | -1.314051 |
| C | -4.256930 | 0.201801  | 0.981412  |
| C | -4.998968 | -0.285292 | -0.093559 |
| H | -4.938122 | -0.920380 | -2.155588 |
| H | -4.736415 | 0.392258  | 1.940206  |
| H | -6.061642 | -0.473931 | 0.030392  |
| O | -0.368151 | -2.246543 | -1.038153 |
| O | -0.204951 | -2.586164 | 1.108115  |
| N | -0.186080 | -1.861274 | 0.116257  |
| H | -2.510210 | -0.492025 | -2.388275 |
| O | -2.134258 | 0.916078  | 1.887942  |
| H | -2.695680 | 0.991448  | 2.674823  |
| H | -0.638775 | 2.286474  | 0.620524  |
| O | 1.837703  | 1.270578  | 0.352848  |
| C | 1.132193  | 2.137482  | -0.537029 |
| H | 1.452613  | 1.923985  | -1.571994 |

|   |           |          |           |
|---|-----------|----------|-----------|
| H | -0.897681 | 2.575037 | -1.109336 |
| O | 1.452982  | 3.447124 | -0.177736 |
| H | 2.421306  | 3.519904 | -0.193861 |

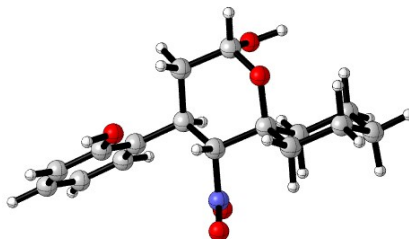

**Figure S2.** Lowest energy geometry of (2*R*,4*R*,5*R*)-4-(2-hydroxyphenyl)-5-nitro-1-oxaspiro[5.5]undecan-2-ol (**4a-R**)

$G$  (chloroform) = - 1053.196027 Hartree

|   |           |           |           |
|---|-----------|-----------|-----------|
| C | -3.750115 | 0.133736  | 1.191867  |
| C | -2.248523 | -0.189833 | 1.185090  |
| C | -1.661712 | -0.109200 | -0.242456 |
| C | -2.443527 | -1.053495 | -1.174710 |
| C | -3.950245 | -0.754227 | -1.166053 |
| C | -4.525666 | -0.803490 | 0.256008  |
| H | -2.107519 | -1.210455 | 1.558039  |
| H | -1.707308 | 0.475631  | 1.859186  |
| H | -3.904820 | 1.171452  | 0.867121  |
| H | -4.133296 | 0.060296  | 2.216811  |
| H | -2.263134 | -2.086001 | -0.854609 |
| H | -2.040424 | -0.954772 | -2.189117 |
| H | -4.467356 | -1.471992 | -1.814544 |
| H | -4.115104 | 0.242459  | -1.592535 |
| H | -4.457820 | -1.831432 | 0.642178  |
| H | -5.590697 | -0.539675 | 0.245776  |
| C | -0.133326 | -0.421938 | -0.312999 |
| H | 0.132368  | -0.595144 | -1.354567 |
| C | 0.418100  | 1.999107  | -0.450694 |

|   |           |           |           |
|---|-----------|-----------|-----------|
| H | 0.968488  | 2.828710  | 0.003044  |
| C | 0.750766  | 0.686804  | 0.284529  |
| H | 0.471270  | 0.808519  | 1.333225  |
| C | 2.229992  | 0.344452  | 0.243442  |
| C | 2.922031  | 0.099443  | -0.957244 |
| C | 2.955099  | 0.253629  | 1.436229  |
| C | 4.284075  | -0.212508 | -0.951081 |
| C | 4.315507  | -0.054817 | 1.455863  |
| H | 2.428294  | 0.418190  | 2.372002  |
| C | 4.981151  | -0.288984 | 0.253742  |
| H | 4.794352  | -0.396730 | -1.895166 |
| H | 4.845496  | -0.119275 | 2.401265  |
| H | 6.039303  | -0.534985 | 0.246463  |
| O | 0.135450  | -2.749997 | -0.331695 |
| O | 0.354338  | -1.733217 | 1.582888  |
| N | 0.150570  | -1.741136 | 0.370525  |
| O | 2.213931  | 0.175740  | -2.135093 |
| H | 2.794410  | -0.076068 | -2.869731 |
| C | -1.073341 | 2.293214  | -0.384337 |
| H | -1.343457 | 3.091616  | -1.089208 |
| H | 0.713750  | 1.925453  | -1.500070 |
| O | -1.857841 | 1.199459  | -0.829311 |
| O | -1.371050 | 2.686778  | 0.941461  |
| H | -2.331008 | 2.820687  | 0.991598  |

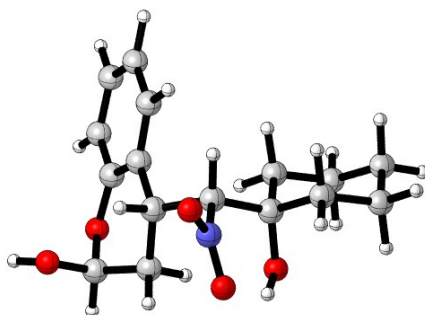

**Figure S3.** Lowest energy geometry of (2*S*,4*R*)-4-((*R*)-(1-hydroxycyclohexyl)(nitro)methyl)chroman-2-ol (**4a'-S**)

$G$  (chloroform) = -1053.19198 Hartree

|   |           |           |           |
|---|-----------|-----------|-----------|
| C | 2.242033  | -2.320264 | 1.810192  |
| C | 1.462917  | -1.177001 | 1.649400  |
| C | 1.604744  | -0.330322 | 0.541272  |
| C | 2.619264  | -0.641226 | -0.380979 |
| C | 3.400680  | -1.791794 | -0.236392 |
| C | 3.206092  | -2.637142 | 0.850017  |
| H | 2.096748  | -2.957367 | 2.677517  |
| H | 0.722407  | -0.943850 | 2.409089  |
| H | 4.159884  | -1.991354 | -0.986152 |
| H | 3.816164  | -3.529842 | 0.955645  |
| O | 2.912470  | 0.140413  | -1.474307 |
| C | 0.760240  | 0.926907  | 0.346174  |
| H | 1.158495  | 1.674927  | 1.045193  |
| C | 0.937199  | 1.487335  | -1.075868 |
| H | 0.392997  | 0.881958  | -1.801330 |
| H | 0.549390  | 2.507452  | -1.134989 |
| C | 2.405181  | 1.476025  | -1.451660 |
| C | -0.728588 | 0.733762  | 0.759585  |
| H | -0.756211 | 0.261460  | 1.740080  |
| C | -1.732581 | -0.025859 | -0.164468 |
| C | -3.117440 | -0.074474 | 0.534488  |

|   |           |           |           |
|---|-----------|-----------|-----------|
| C | -1.232790 | -1.460956 | -0.419373 |
| C | -4.132499 | -0.888694 | -0.278764 |
| H | -2.999788 | -0.520829 | 1.532309  |
| H | -3.490870 | 0.946387  | 0.680864  |
| C | -2.251520 | -2.276984 | -1.228977 |
| H | -0.276452 | -1.421554 | -0.947793 |
| H | -1.042908 | -1.951256 | 0.543470  |
| C | -3.621806 | -2.311589 | -0.540228 |
| H | -5.092339 | -0.911686 | 0.251499  |
| H | -4.302222 | -0.380886 | -1.235755 |
| H | -1.864855 | -3.293627 | -1.370552 |
| H | -2.352707 | -1.827735 | -2.223785 |
| H | -3.536022 | -2.848918 | 0.416719  |
| H | -4.342442 | -2.869119 | -1.151253 |
| O | -1.859116 | 0.576197  | -1.450182 |
| H | -2.036595 | 1.521957  | -1.296339 |
| O | -1.162433 | 2.522465  | 2.225661  |
| O | -1.695458 | 2.817122  | 0.139238  |
| N | -1.249984 | 2.132735  | 1.070486  |
| H | 2.561766  | 1.823681  | -2.480197 |
| O | 3.105478  | 2.266596  | -0.524489 |
| H | 4.051142  | 2.192370  | -0.731524 |

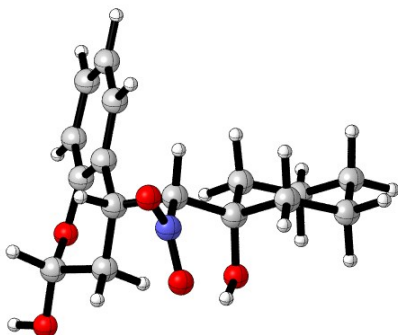

**Figure S4.** Lowest energy geometry of (2*R*,4*R*)-4-((*R*)-(1-hydroxycyclohexyl)(nitro)methyl)chroman-2-ol (**4a'-R**)

$G$  (chloroform) = -1053.189983 Hartree

|   |           |           |           |
|---|-----------|-----------|-----------|
| C | 2.216876  | 2.462476  | -1.781613 |
| C | 1.446786  | 1.302913  | -1.750601 |
| C | 1.596036  | 0.342143  | -0.740425 |
| C | 2.608526  | 0.553582  | 0.212786  |
| C | 3.380703  | 1.720898  | 0.197634  |
| C | 3.176260  | 2.679236  | -0.788016 |
| H | 2.069163  | 3.190940  | -2.573263 |
| H | 0.707229  | 1.146596  | -2.531716 |
| H | 4.138307  | 1.843200  | 0.965217  |
| H | 3.777782  | 3.583909  | -0.793327 |
| O | 2.893372  | -0.352271 | 1.198805  |
| C | 0.729372  | -0.914822 | -0.676588 |
| H | 1.022534  | -1.538039 | -1.534602 |
| C | 0.993554  | -1.719000 | 0.610132  |
| H | 0.471607  | -1.279468 | 1.460803  |
| H | 0.645965  | -2.749632 | 0.500243  |
| C | 2.471556  | -1.703496 | 0.930387  |
| H | 3.077557  | -2.065132 | 0.079384  |
| C | -0.782156 | -0.613772 | -0.921172 |
| H | -0.868051 | -0.006807 | -1.821228 |
| C | -1.669640 | 0.045759  | 0.182666  |

|   |           |           |           |
|---|-----------|-----------|-----------|
| C | -3.103931 | 0.234366  | -0.381681 |
| C | -1.085767 | 1.415424  | 0.579776  |
| C | -4.010862 | 0.968171  | 0.614814  |
| H | -3.048523 | 0.804307  | -1.320328 |
| H | -3.534106 | -0.744648 | -0.624633 |
| C | -1.999634 | 2.155081  | 1.568397  |
| H | -0.097217 | 1.269228  | 1.022303  |
| H | -0.944848 | 2.020922  | -0.324322 |
| C | -3.417372 | 2.326698  | 1.008754  |
| H | -5.009568 | 1.091465  | 0.178510  |
| H | -4.121835 | 0.345728  | 1.510780  |
| H | -1.556427 | 3.130490  | 1.803333  |
| H | -2.040780 | 1.584854  | 2.503647  |
| H | -3.384061 | 2.979710  | 0.123175  |
| H | -4.060785 | 2.825199  | 1.744264  |
| O | -1.717420 | -0.718634 | 1.383547  |
| H | -1.965198 | -1.625348 | 1.127334  |
| O | 2.692757  | -2.449456 | 2.078866  |
| H | 3.634962  | -2.377618 | 2.302739  |
| O | -1.370114 | -2.182856 | -2.571443 |
| O | -1.813073 | -2.719828 | -0.512315 |
| N | -1.385674 | -1.939919 | -1.372784 |

## J. NMR spectra and HPLC analyses

### The $^1\text{H}$ NMR spectrum of 5a (500 MHz, $\text{CDCl}_3$ )

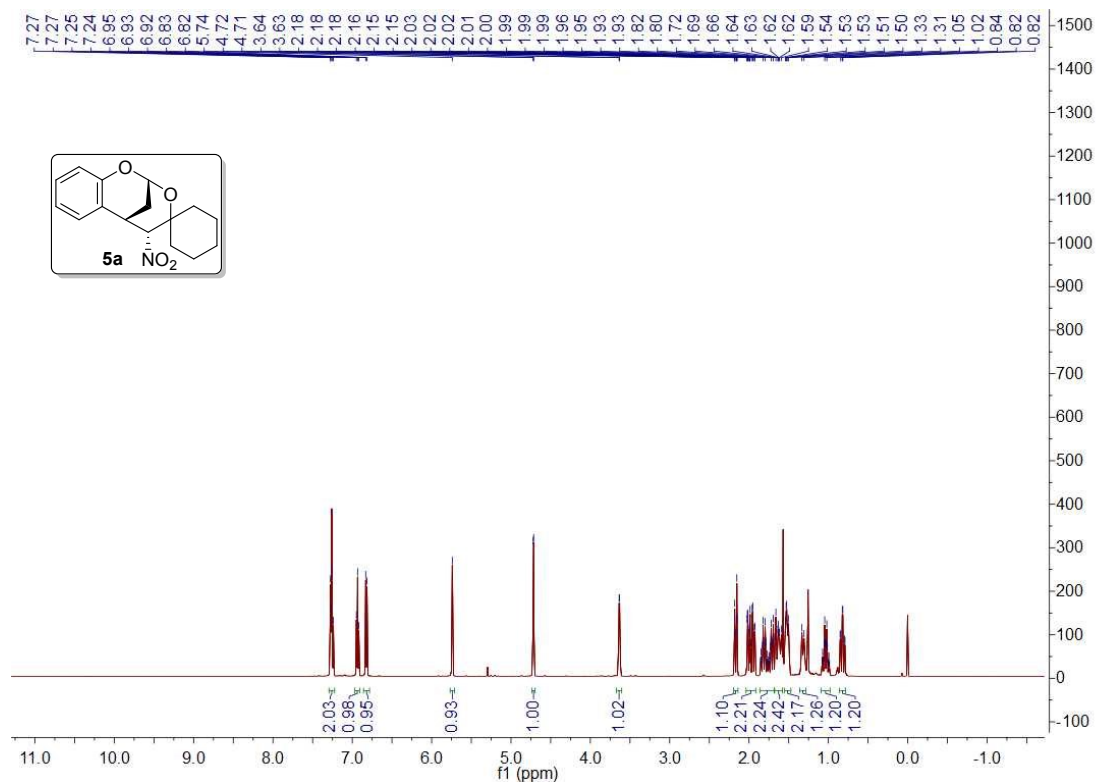

### The $^{13}\text{C}$ NMR spectrum of 5a (125 MHz, $\text{CDCl}_3$ )

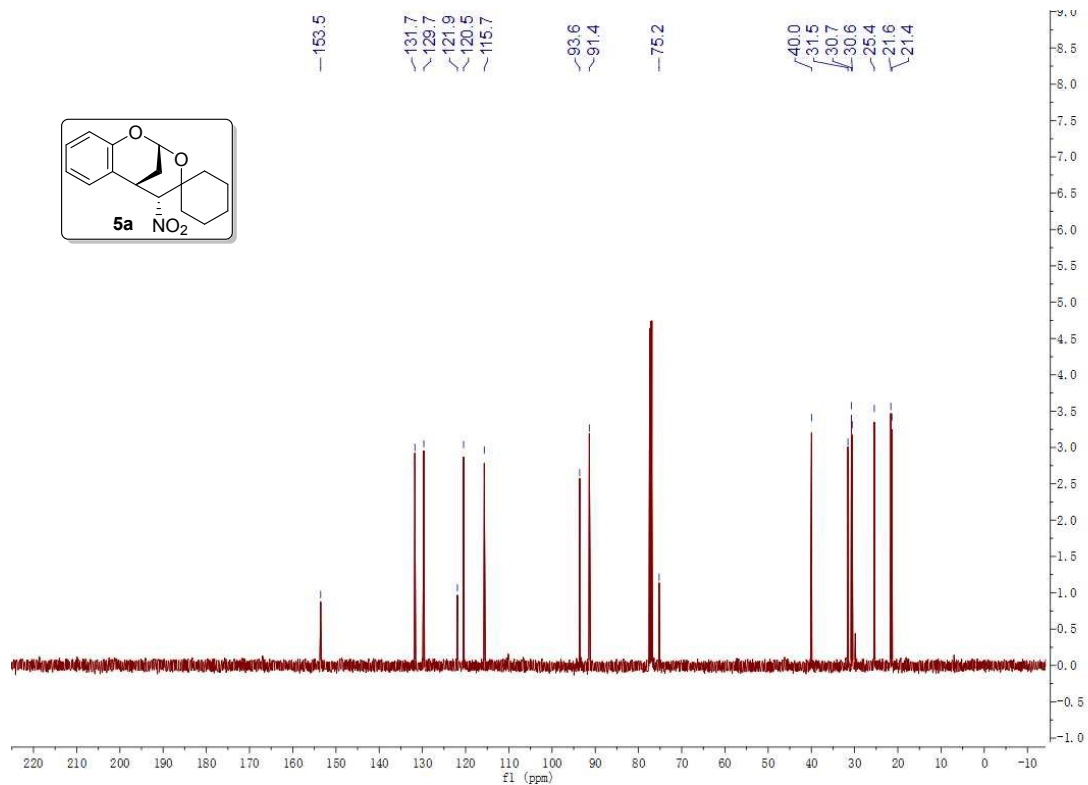



## The HPLC of racemic 5a

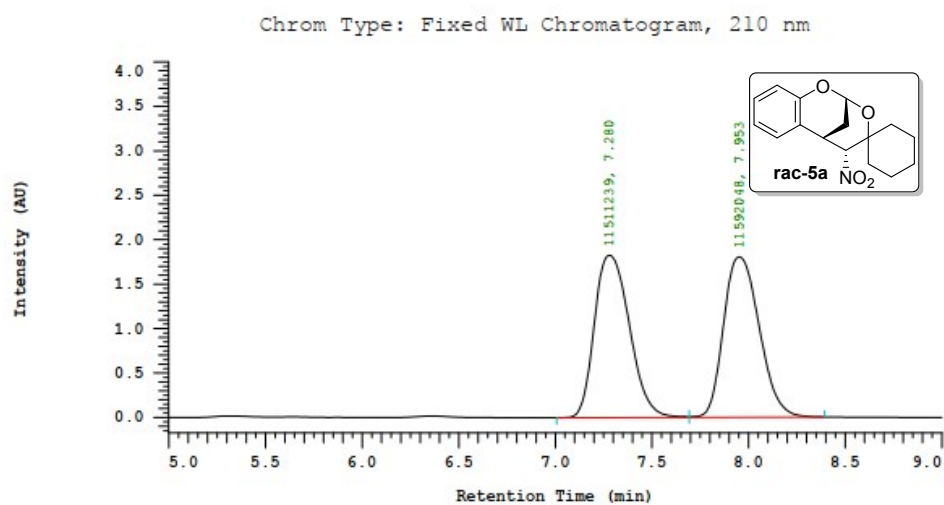

Chrom Type: Fixed WL Chromatogram, 210 nm  
 Peak Quantitation: AREA  
 Calculation Method: AREA%

| No. | RT    | Area     | Area %  | BC |
|-----|-------|----------|---------|----|
| 1   | 7.280 | 11511239 | 49.825  | BV |
| 2   | 7.953 | 11592048 | 50.175  | VB |
|     |       | 23103287 | 100.000 |    |

## The HPLC of chiral 5a

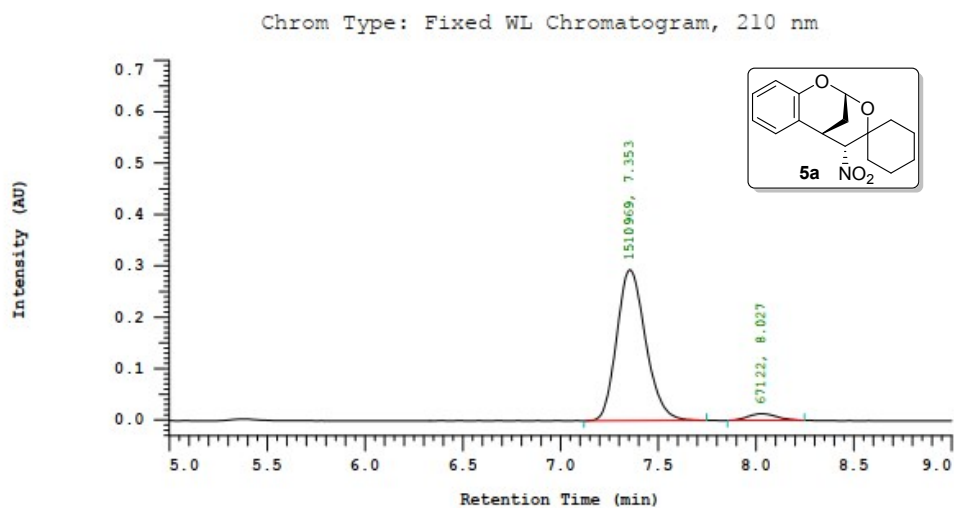

Chrom Type: Fixed WL Chromatogram, 210 nm  
 Peak Quantitation: AREA  
 Calculation Method: AREA%

| No. | RT    | Area    | Area %  | BC |
|-----|-------|---------|---------|----|
| 1   | 7.353 | 1510969 | 95.747  | BB |
| 2   | 8.027 | 67122   | 4.253   | BB |
|     |       | 1578091 | 100.000 |    |

## The HPLC of chiral 5a after recrystallization

Chrom Type: Fixed WL Chromatogram, 210 nm

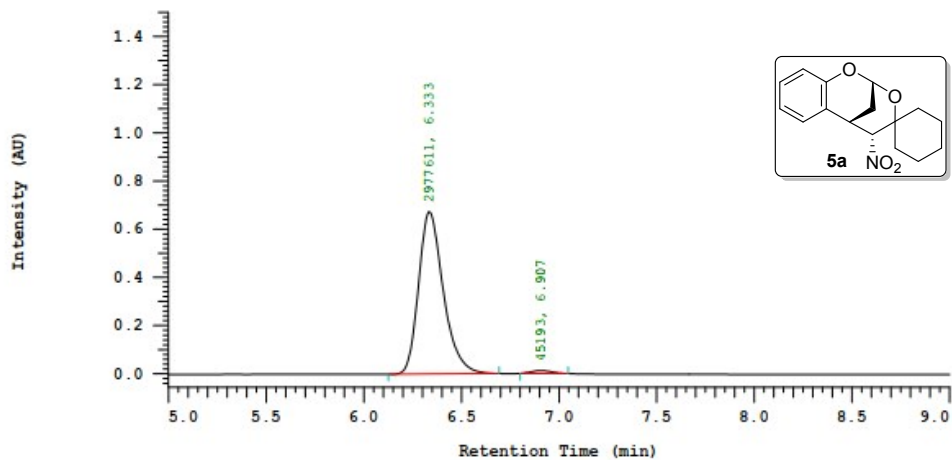

Chrom Type: Fixed WL Chromatogram, 210 nm

Peak Quantitation: AREA  
Calculation Method: AREA%

| No. | RT    | Area    | Area %  | BC |
|-----|-------|---------|---------|----|
| 1   | 6.333 | 2977611 | 98.505  | BB |
| 2   | 6.907 | 45193   | 1.495   | BB |
|     |       | 3022804 | 100.000 |    |

The  $^1\text{H}$  NMR spectrum of **5b** (500 MHz,  $\text{CDCl}_3$ )

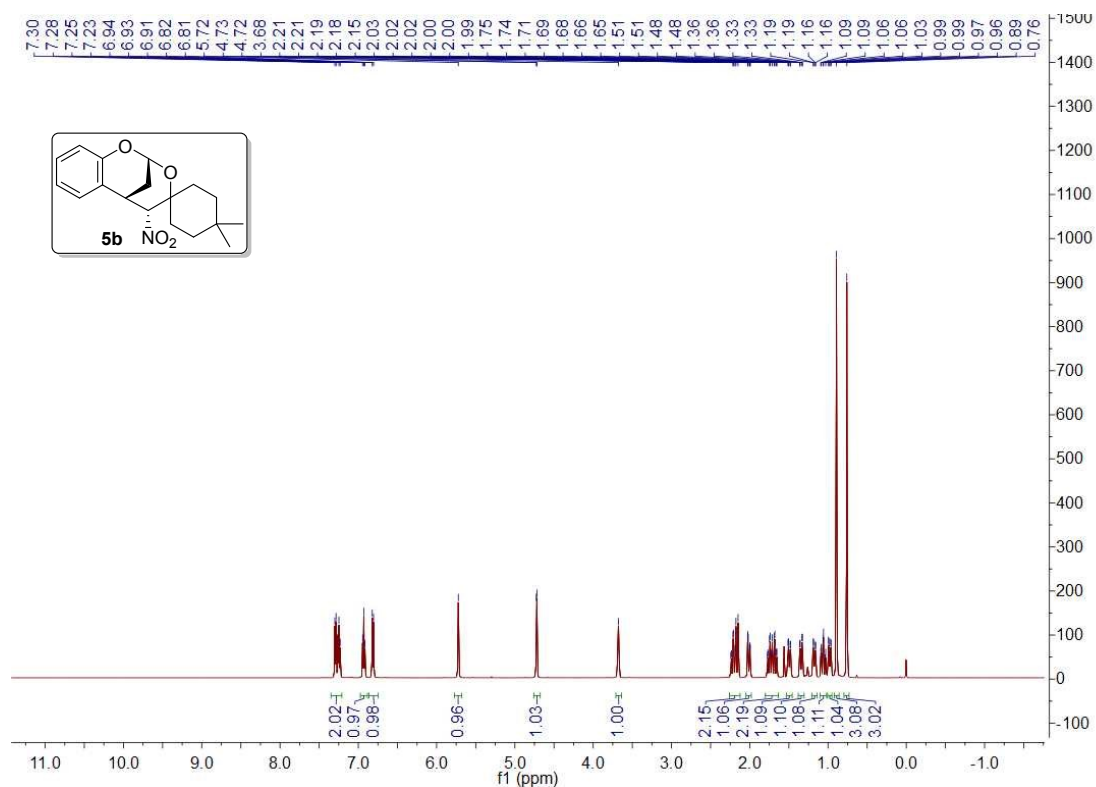

The  $^{13}\text{C}$  NMR spectrum of **5b** (125 MHz,  $\text{CDCl}_3$ )

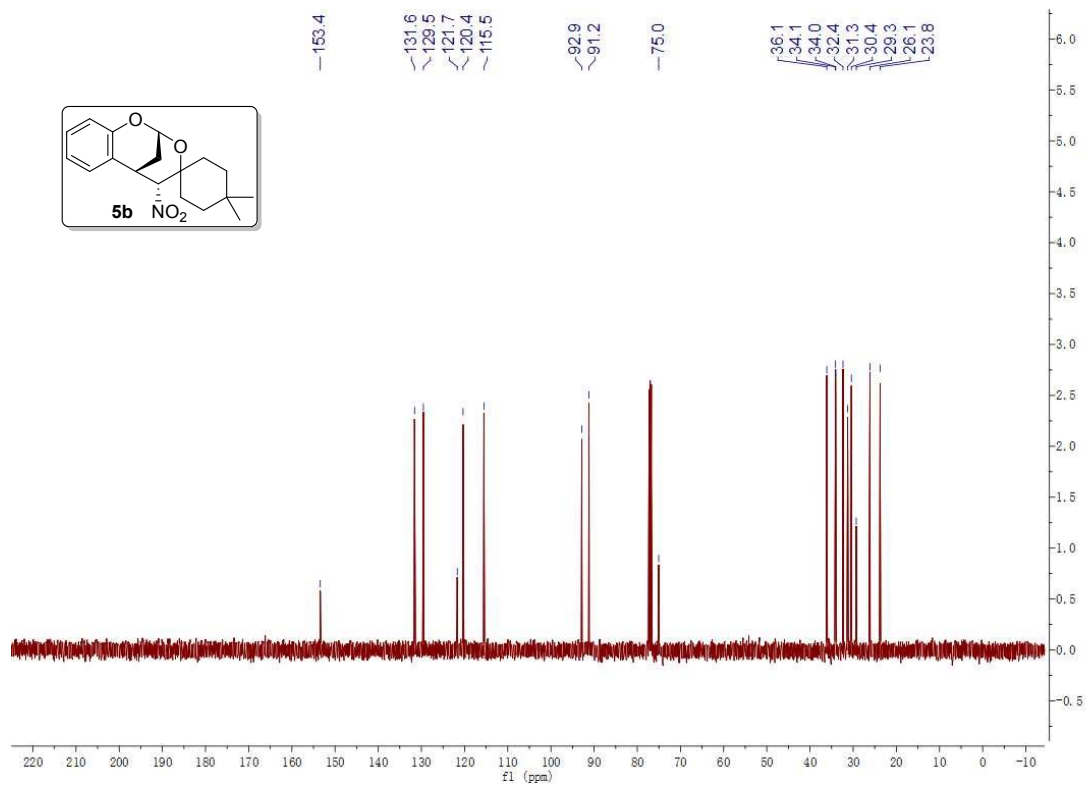

## The HPLC of racemic 5b

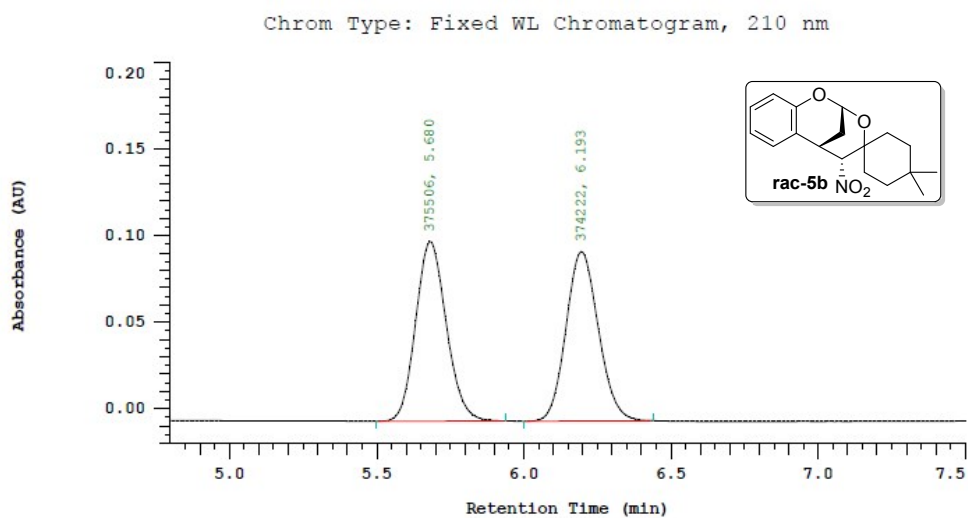

Chrom Type: Fixed WL Chromatogram, 210 nm  
 Peak Quantitation: AREA  
 Calculation Method: AREA%

| No. | RT    | Area   | Area %  | BC |
|-----|-------|--------|---------|----|
| 1   | 5.680 | 375506 | 50.086  | BB |
| 2   | 6.193 | 374222 | 49.914  | BB |
|     |       | 749728 | 100.000 |    |

## The HPLC of chiral 5b

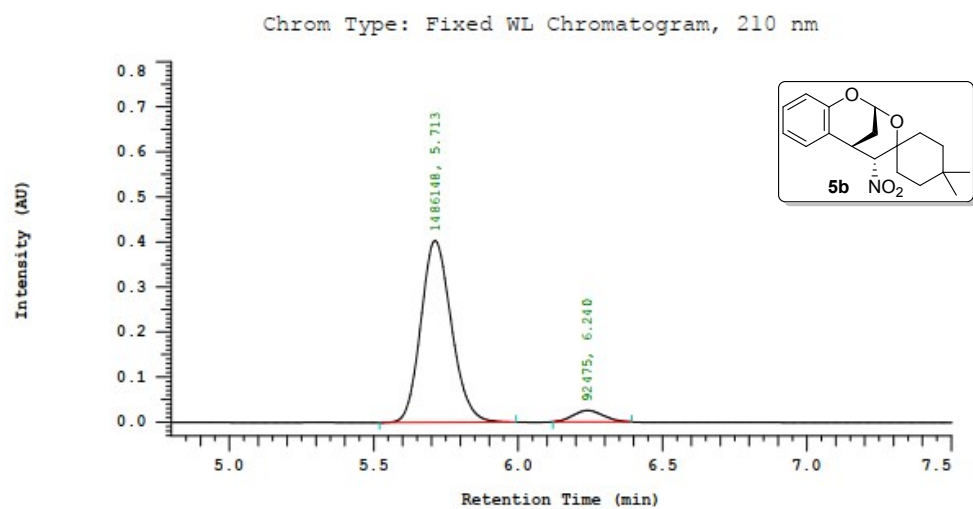

Chrom Type: Fixed WL Chromatogram, 210 nm  
 Peak Quantitation: AREA  
 Calculation Method: AREA%

| No. | RT    | Area    | Area %  | BC |
|-----|-------|---------|---------|----|
| 1   | 5.713 | 1486148 | 94.142  | BB |
| 2   | 6.240 | 92475   | 5.858   | BB |
|     |       | 1578623 | 100.000 |    |

The  $^1\text{H}$  NMR spectrum of **5c** (500 MHz,  $\text{CDCl}_3$ )

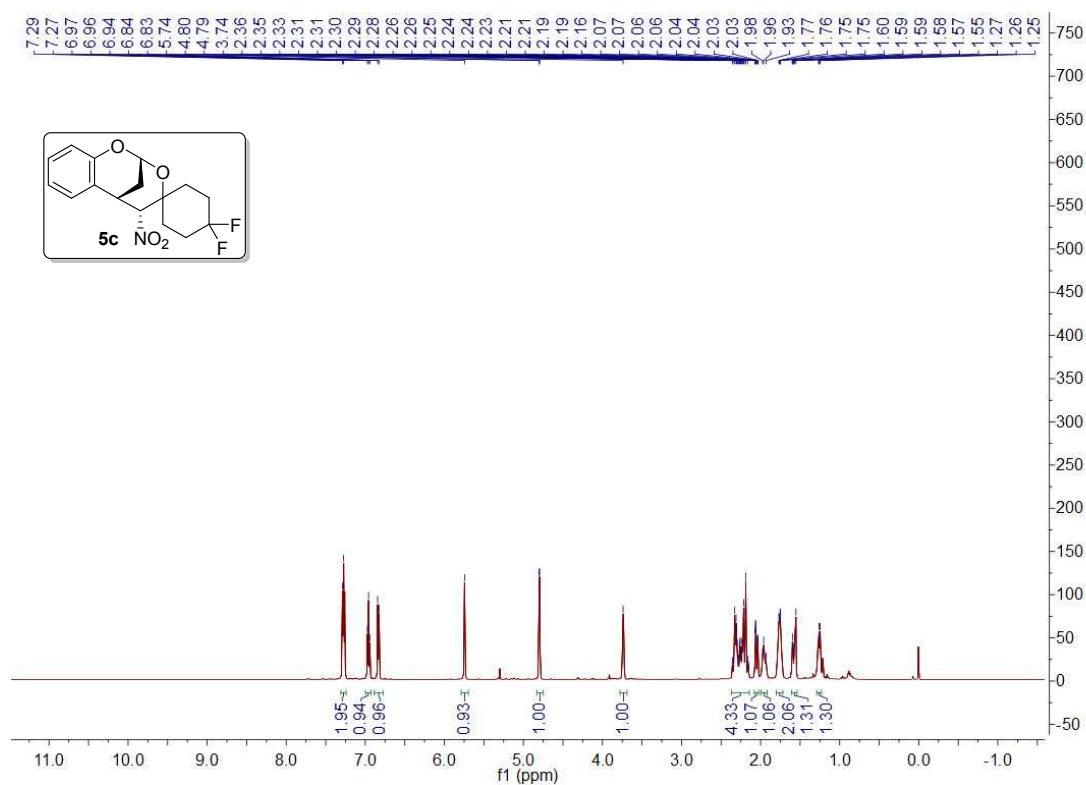

The  $^{13}\text{C}$  NMR spectrum of **5c** (125 MHz,  $\text{CDCl}_3$ )

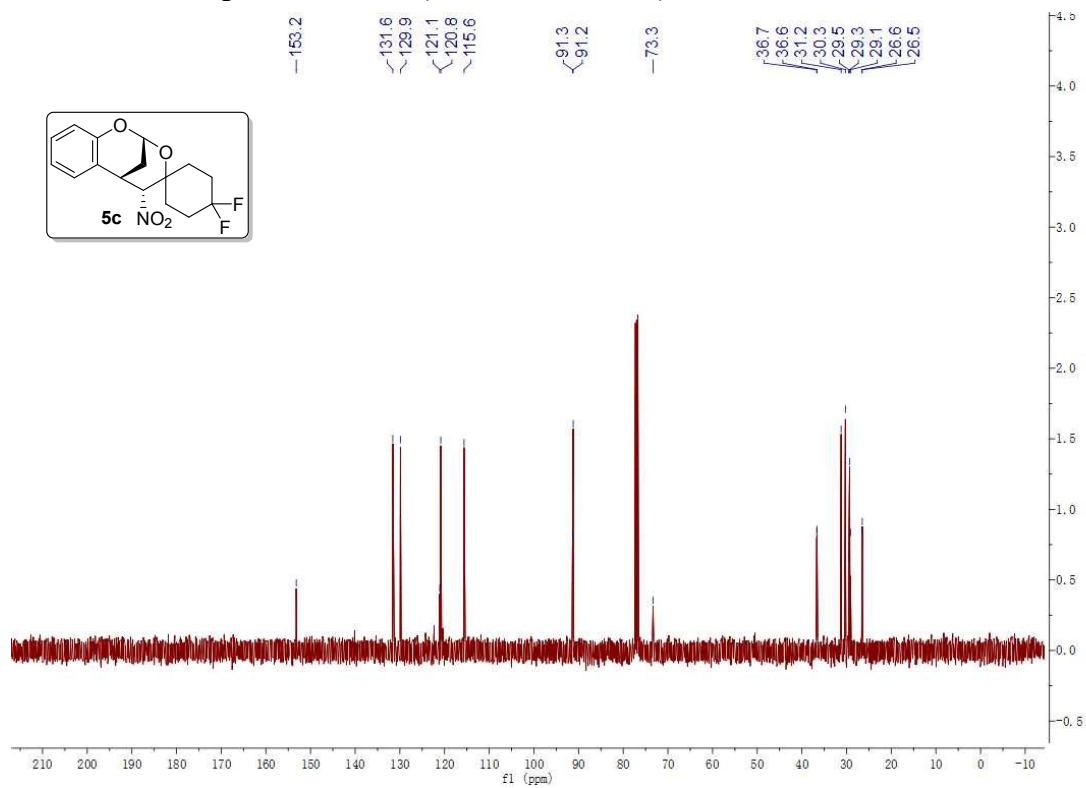

## The HPLC of racemic 5c

Chrom Type: Fixed WL Chromatogram, 210 nm

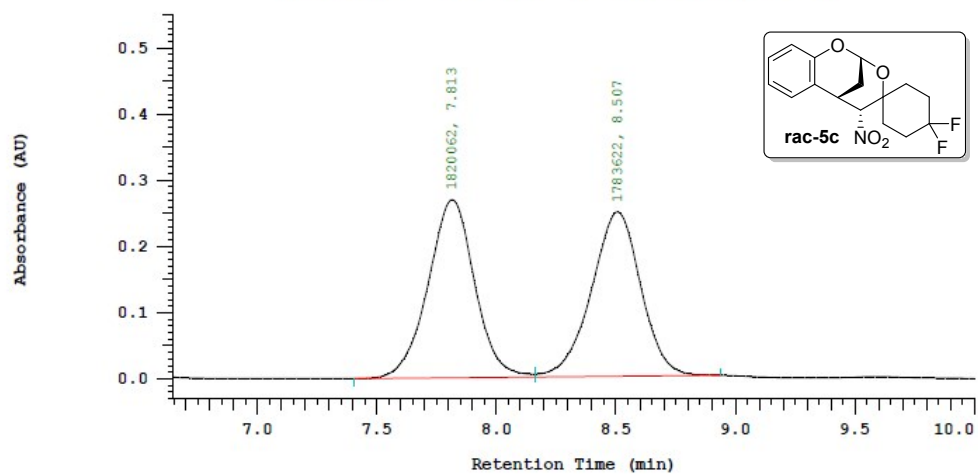

Chrom Type: Fixed WL Chromatogram, 210 nm

Peak Quantitation: AREA  
Calculation Method: AREA%

| No. | RT    | Area    | Area %  | BC |
|-----|-------|---------|---------|----|
| 1   | 7.813 | 1820062 | 50.506  | BV |
| 2   | 8.507 | 1783622 | 49.494  | VB |
|     |       | 3603684 | 100.000 |    |

## The HPLC of chiral 5c

Chrom Type: Fixed WL Chromatogram, 210 nm

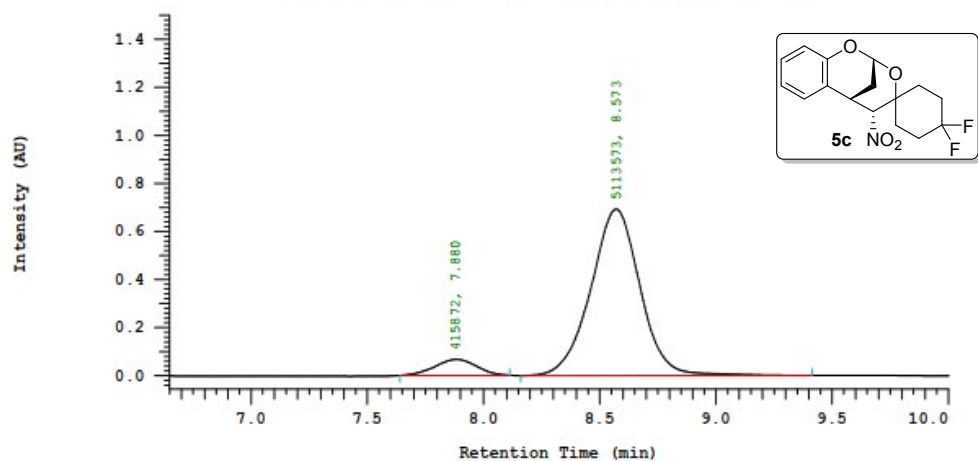

Chrom Type: Fixed WL Chromatogram, 210 nm

Peak Quantitation: AREA  
Calculation Method: AREA%

| No. | RT    | Area    | Area %  | BC |
|-----|-------|---------|---------|----|
| 1   | 7.880 | 415872  | 7.521   | BB |
| 2   | 8.573 | 5113573 | 92.479  | BB |
|     |       | 5529445 | 100.000 |    |

### The $^1\text{H}$ NMR spectrum of 5d (500 MHz, $\text{CDCl}_3$ )

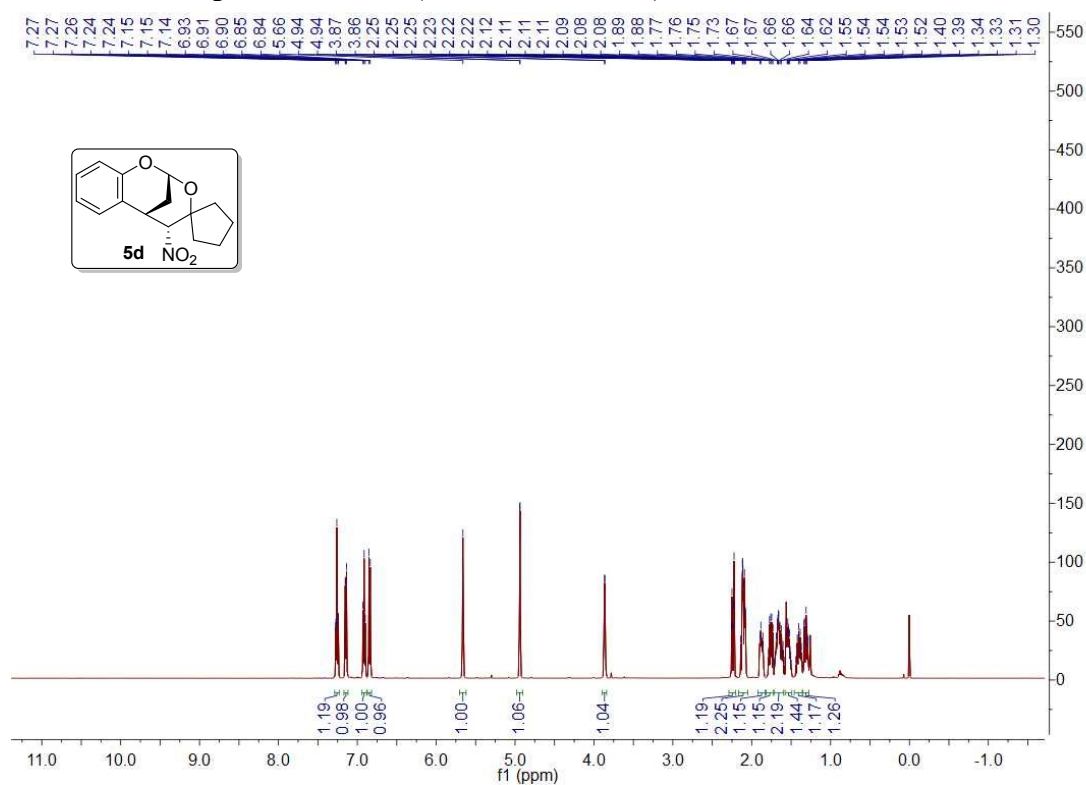

### The $^{13}\text{C}$ NMR spectrum of 5d (125 MHz, $\text{CDCl}_3$ )

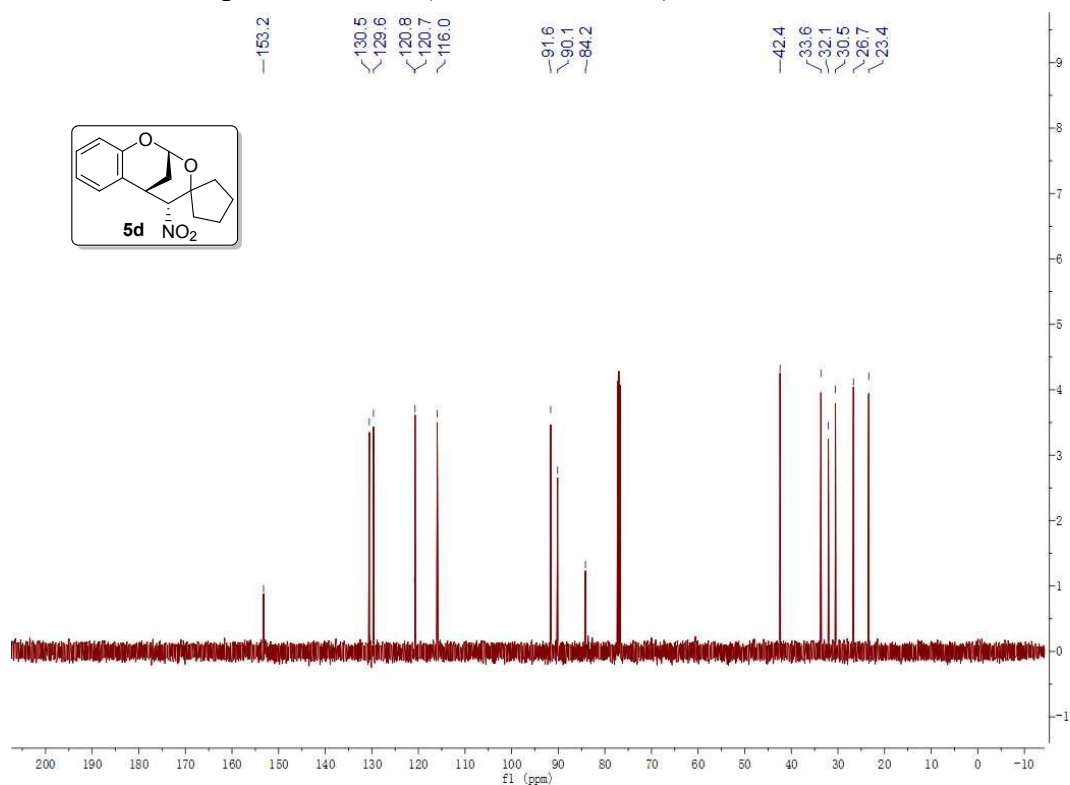

## The HPLC of racemic 5d

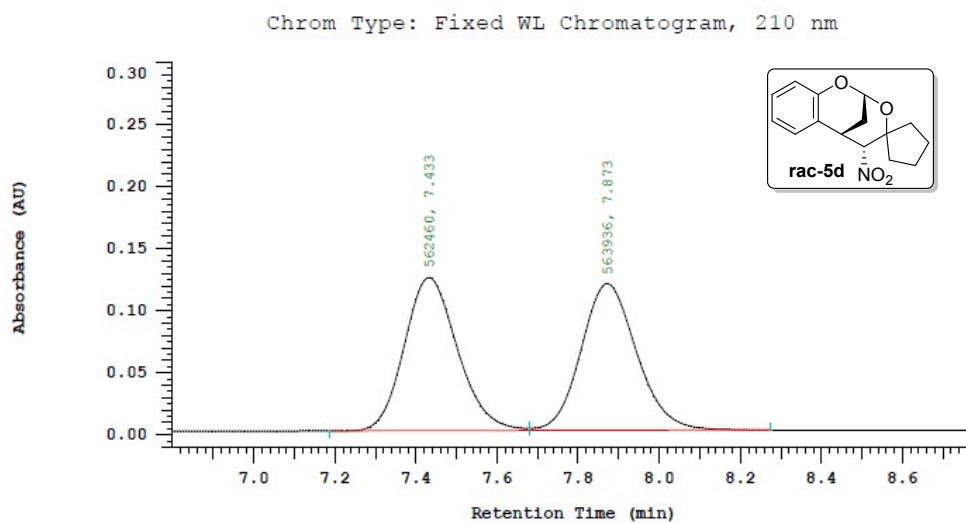

Chrom Type: Fixed WL Chromatogram, 210 nm  
Peak Quantitation: AREA  
Calculation Method: AREA%

| No. | RT    | Area    | Area %  | BC |
|-----|-------|---------|---------|----|
| 1   | 7.433 | 562460  | 49.934  | BV |
| 2   | 7.873 | 563936  | 50.066  | VB |
|     |       | 1126396 | 100.000 |    |

## The HPLC of chiral 5d

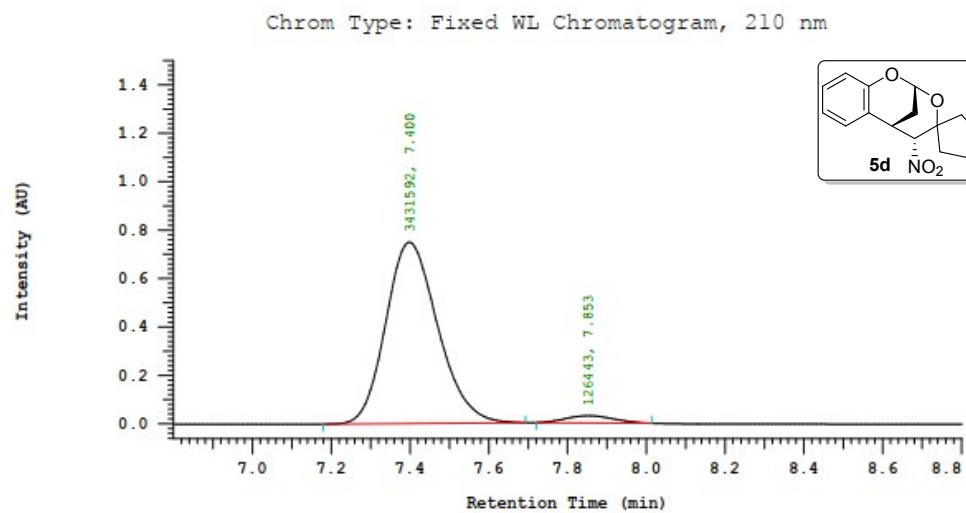

Chrom Type: Fixed WL Chromatogram, 210 nm  
Peak Quantitation: AREA  
Calculation Method: AREA%

| No. | RT    | Area    | Area %  | BC |
|-----|-------|---------|---------|----|
| 1   | 7.400 | 3431592 | 96.446  | BB |
| 2   | 7.853 | 126443  | 3.554   | BB |
|     |       | 3558035 | 100.000 |    |



## The HPLC of chiral 5d after recrystallization

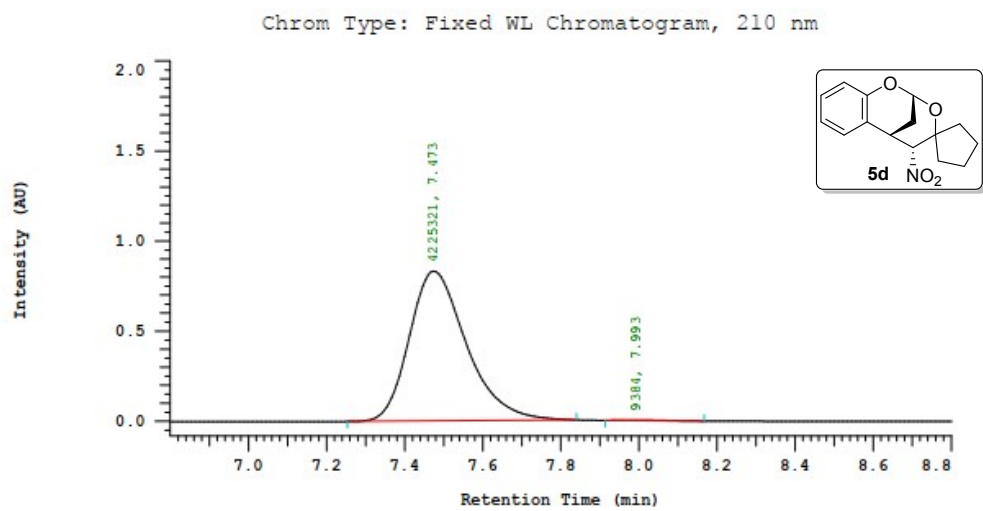

Chrom Type: Fixed WL Chromatogram, 210 nm  
Peak Quantitation: AREA  
Calculation Method: AREA%

| No. | RT    | Area    | Area %  | BC |
|-----|-------|---------|---------|----|
| 1   | 7.473 | 4225321 | 99.778  | BB |
| 2   | 7.993 | 9384    | 0.222   | BB |
|     |       | 4234705 | 100.000 |    |

### The $^1\text{H}$ NMR spectrum of 5e (400 MHz, $\text{CDCl}_3$ )

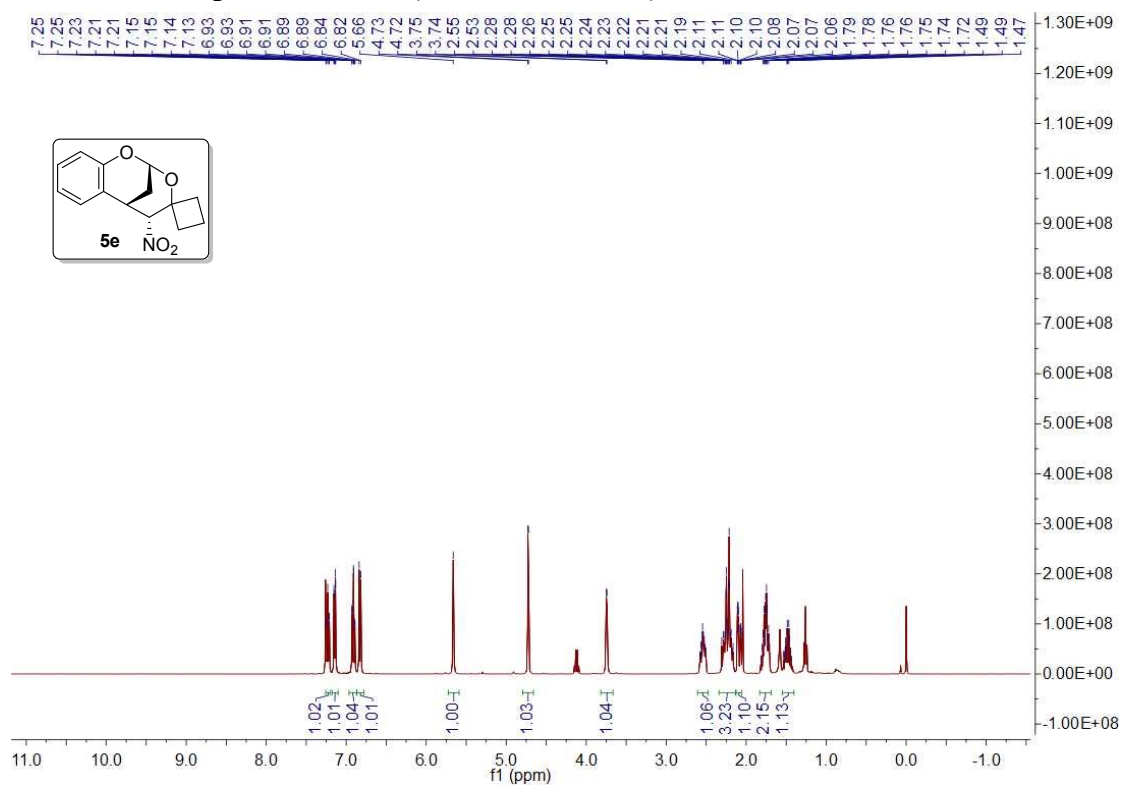

### The $^{13}\text{C}$ NMR spectrum of 5e (101 MHz, $\text{CDCl}_3$ )

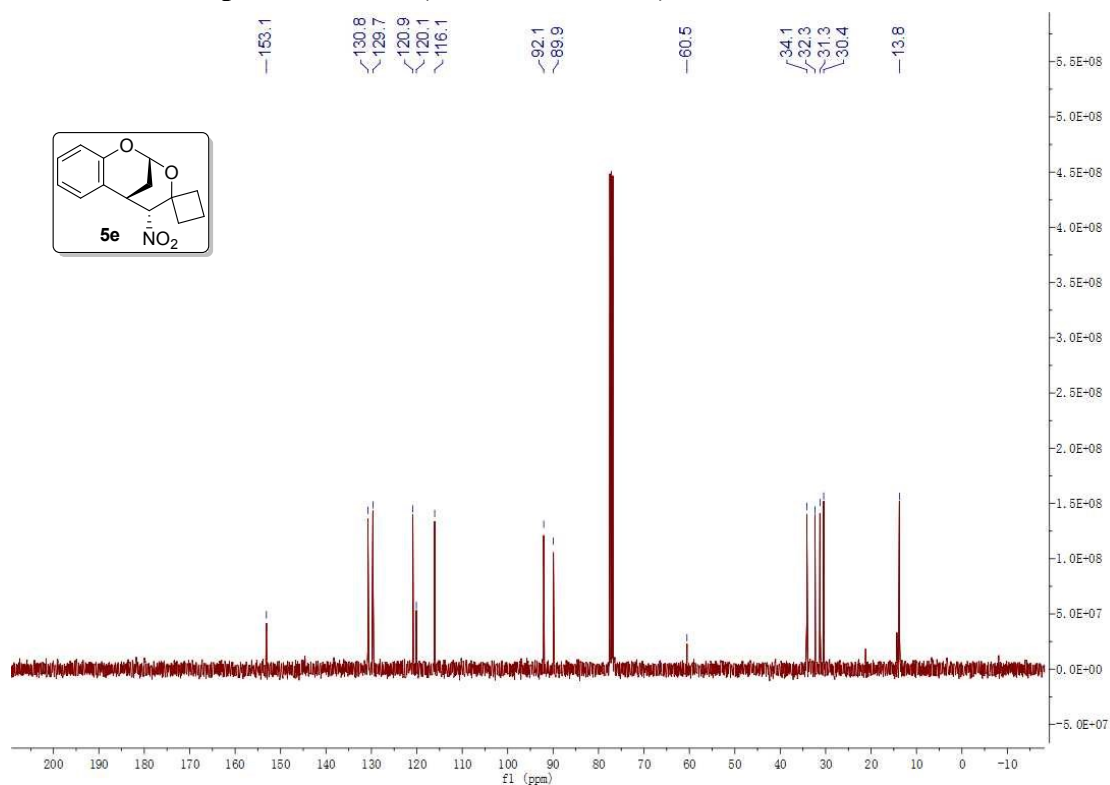

The NOSEY spectrum of 5e (400 MHz, CDCl<sub>3</sub>)

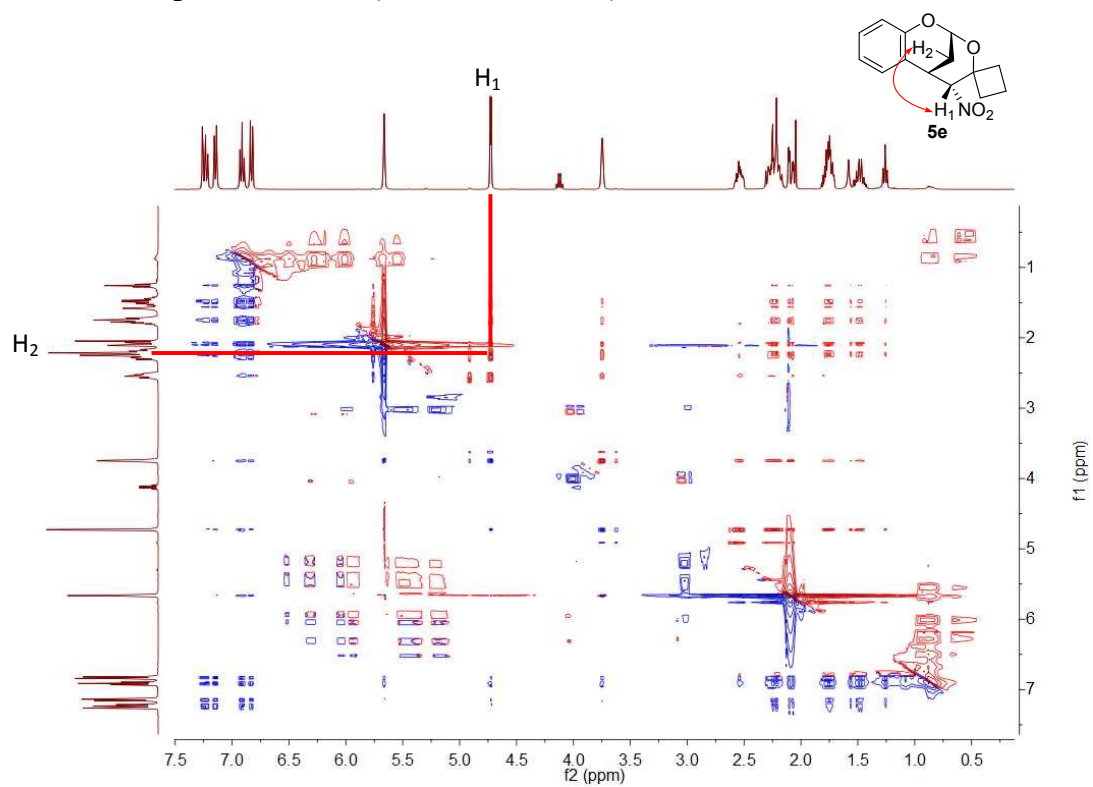

## The HPLC of racemic 5e

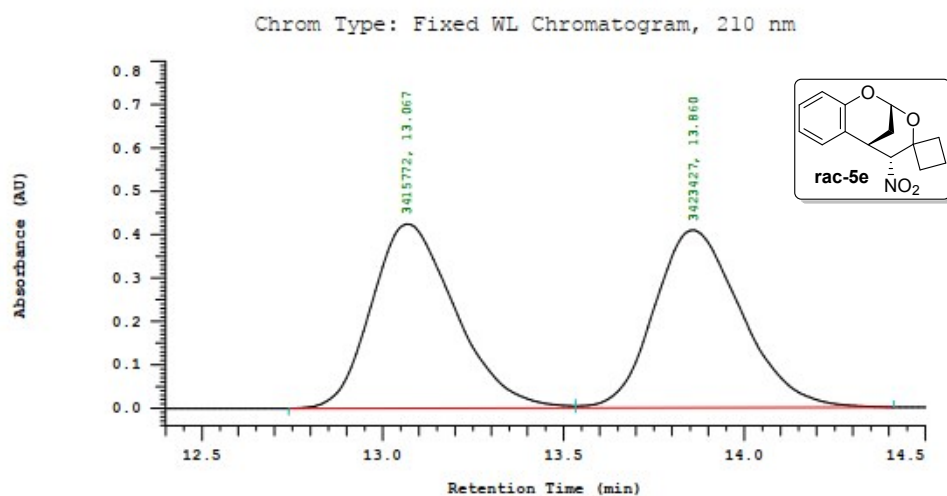

Chrom Type: Fixed WL Chromatogram, 210 nm  
 Peak Quantitation: AREA  
 Calculation Method: AREA%

| No. | RT     | Area    | Area %  | BC |
|-----|--------|---------|---------|----|
| 1   | 13.067 | 3415772 | 49.944  | BV |
| 2   | 13.860 | 3423427 | 50.056  | VB |
|     |        | 6839199 | 100.000 |    |

## The HPLC of chiral 5e

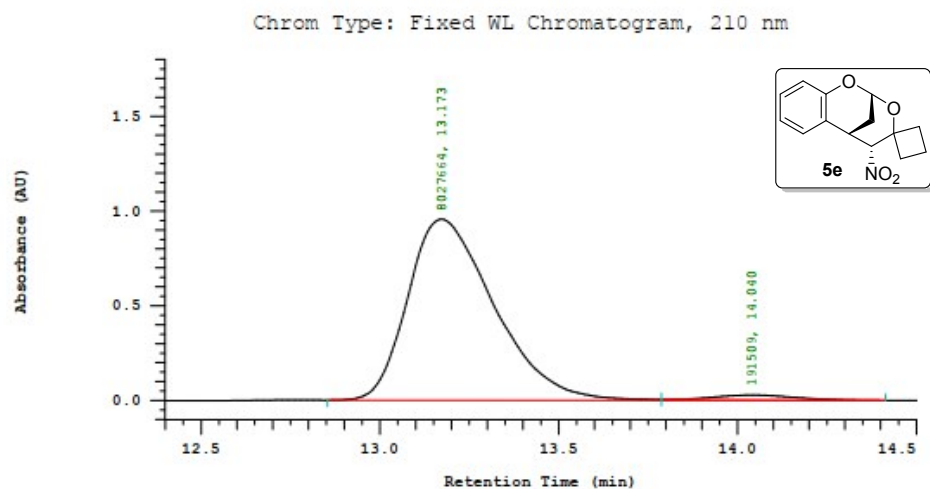

Chrom Type: Fixed WL Chromatogram, 210 nm  
 Peak Quantitation: AREA  
 Calculation Method: AREA%

| No. | RT     | Area    | Area %  | BC  |
|-----|--------|---------|---------|-----|
| 1   | 13.173 | 8027664 | 97.670  | BV  |
| 2   | 14.040 | 191509  | 2.330   | TBB |
|     |        | 8219173 | 100.000 |     |

### The $^1\text{H}$ NMR spectrum of $5e'$ (400 MHz, $\text{CDCl}_3$ )

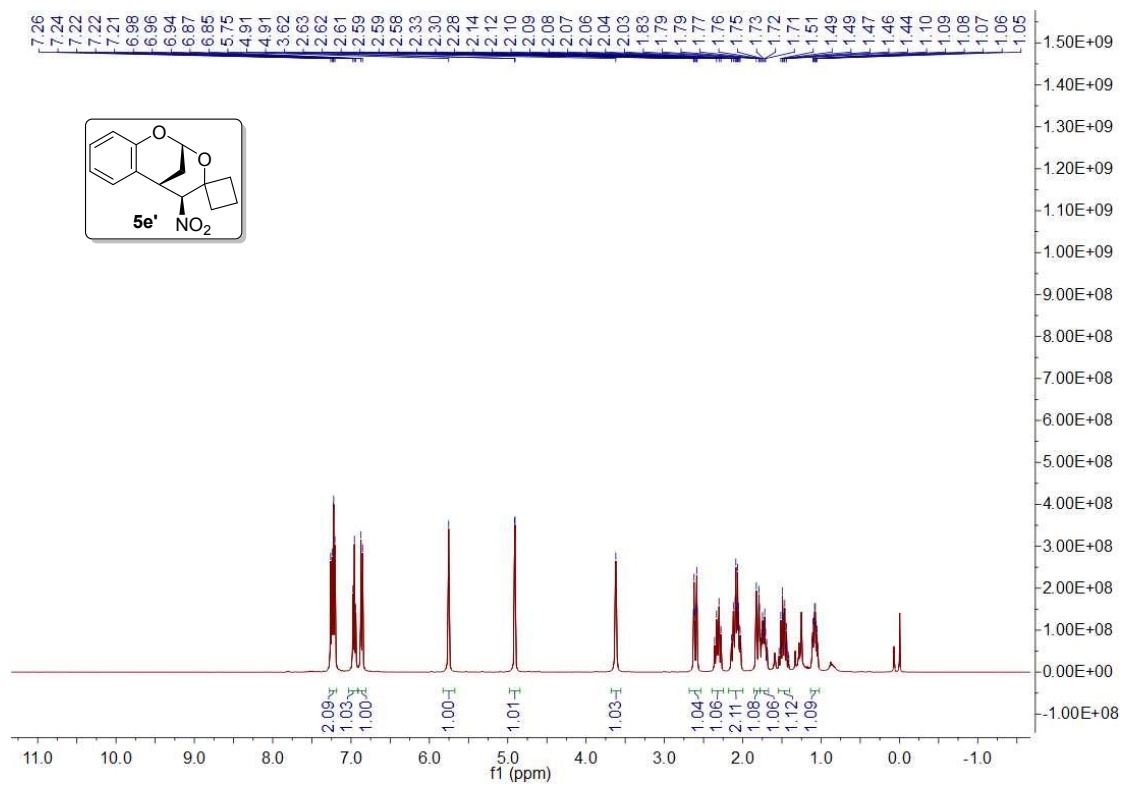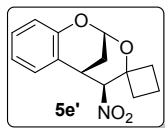

### The $^{13}\text{C}$ NMR spectrum of $5e'$ (101 MHz, $\text{CDCl}_3$ )

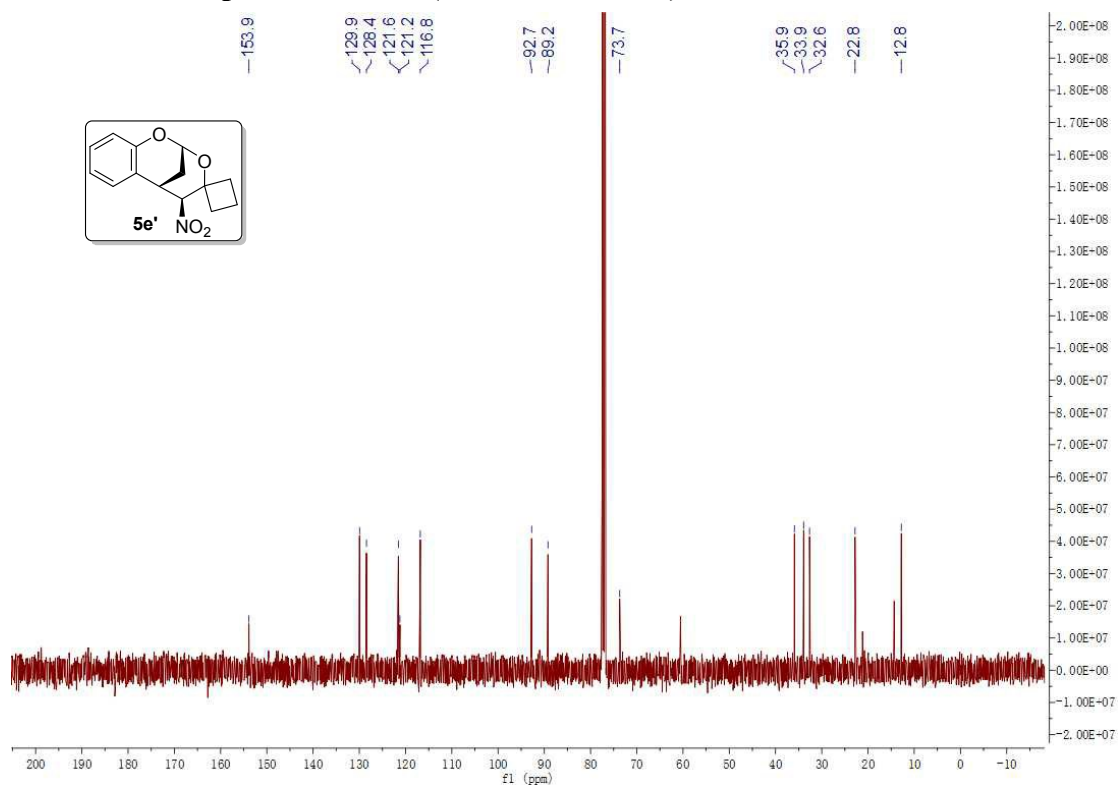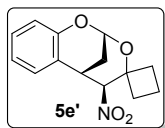

## The HPLC of racemic 5e'

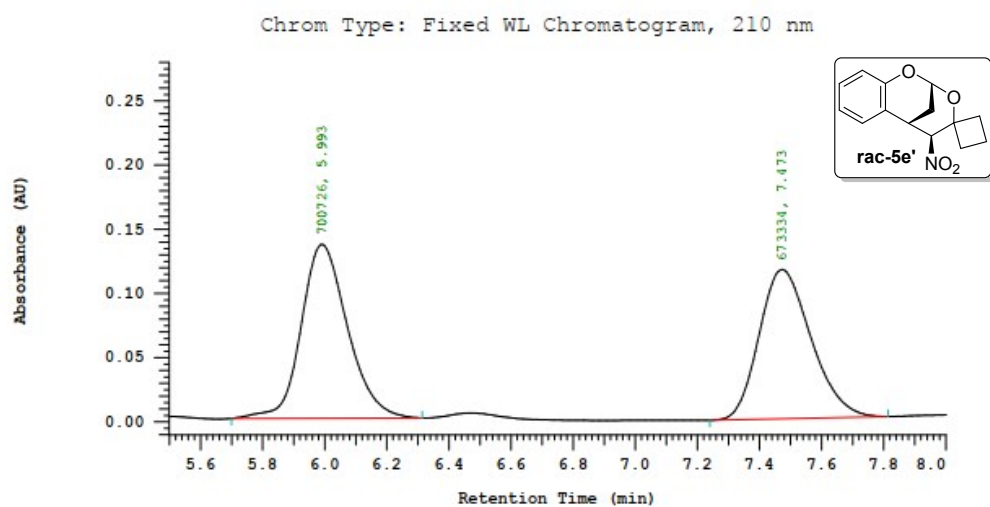

Chrom Type: Fixed WL Chromatogram, 210 nm  
 Peak Quantitation: AREA  
 Calculation Method: AREA%

| No. | RT    | Area    | Area %  | BC |
|-----|-------|---------|---------|----|
| 1   | 5.993 | 700726  | 50.997  | BB |
| 2   | 7.473 | 673334  | 49.003  | BB |
|     |       | 1374060 | 100.000 |    |

## The HPLC of chiral 5e'

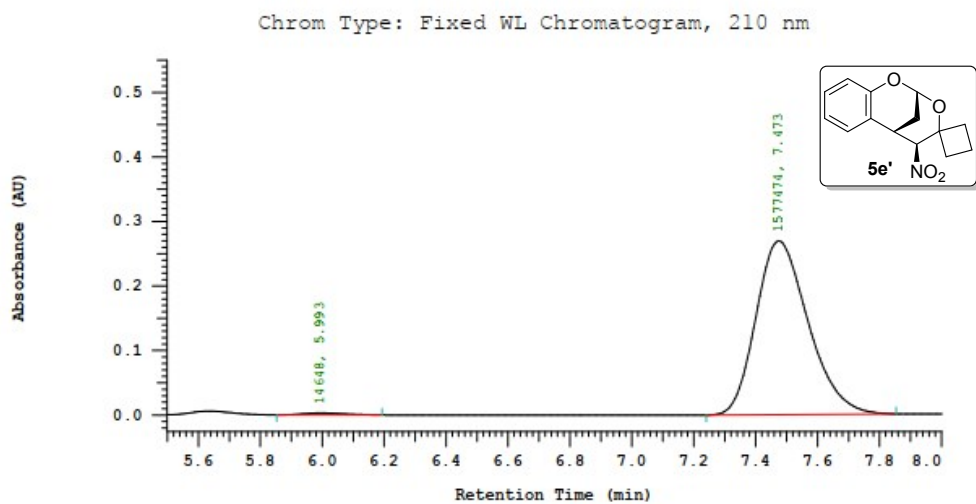

Chrom Type: Fixed WL Chromatogram, 210 nm  
 Peak Quantitation: AREA  
 Calculation Method: AREA%

| No. | RT    | Area    | Area %  | BC |
|-----|-------|---------|---------|----|
| 1   | 5.993 | 14648   | 0.920   | BB |
| 2   | 7.473 | 1577474 | 99.080  | BB |
|     |       | 1592122 | 100.000 |    |

### The $^1\text{H}$ NMR spectrum of **5f** (400 MHz, $\text{CDCl}_3$ )

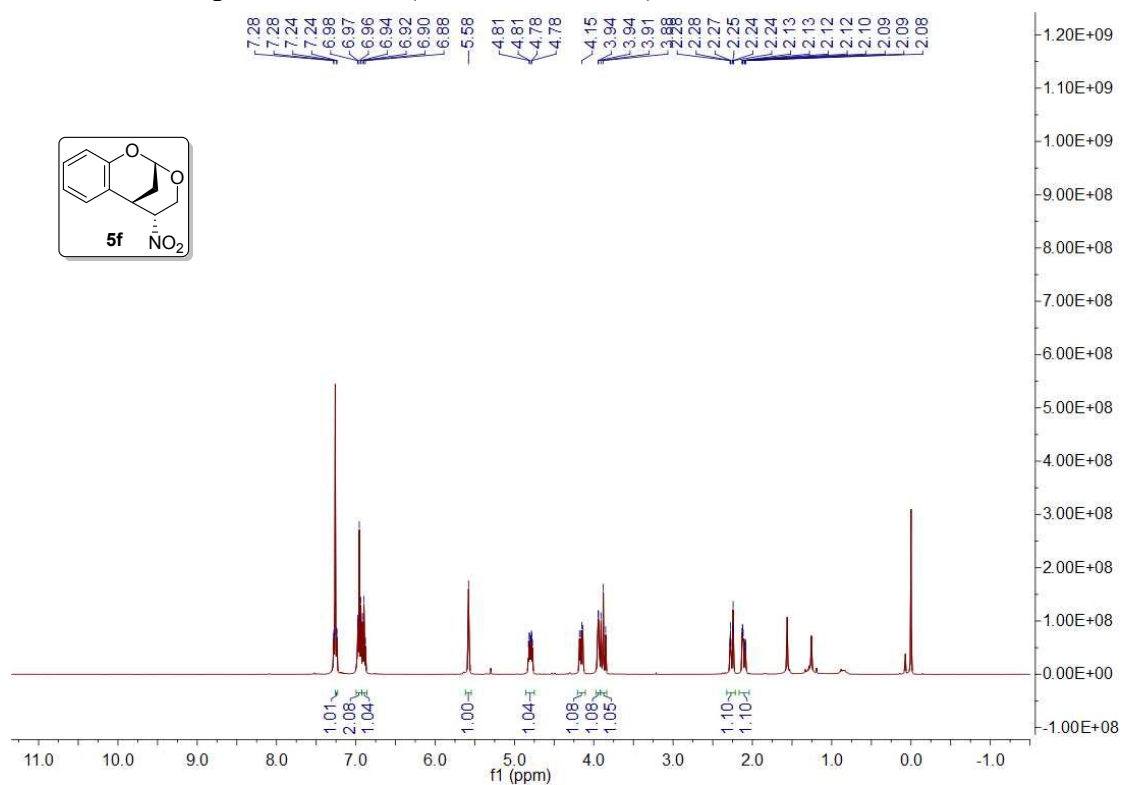

### The $^{13}\text{C}$ NMR spectrum of **5f** (101 MHz, $\text{CDCl}_3$ )

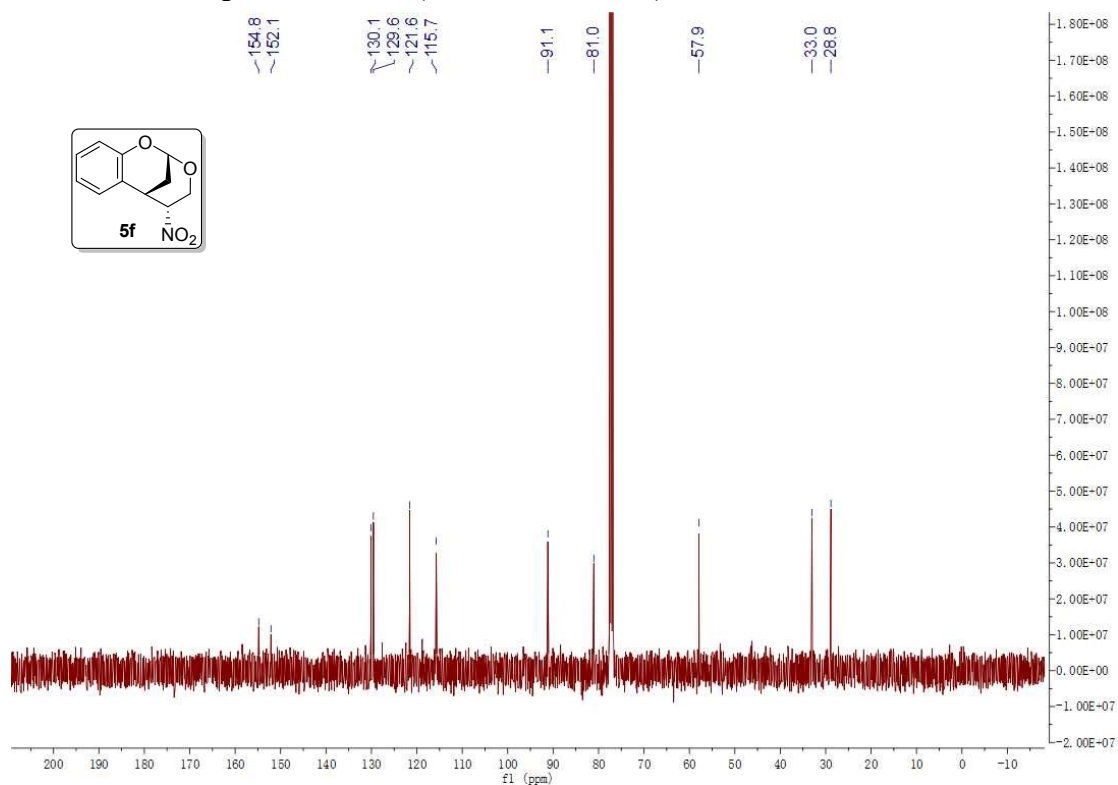

The NOSEY spectrum of 5f (400 MHz, CDCl<sub>3</sub>)

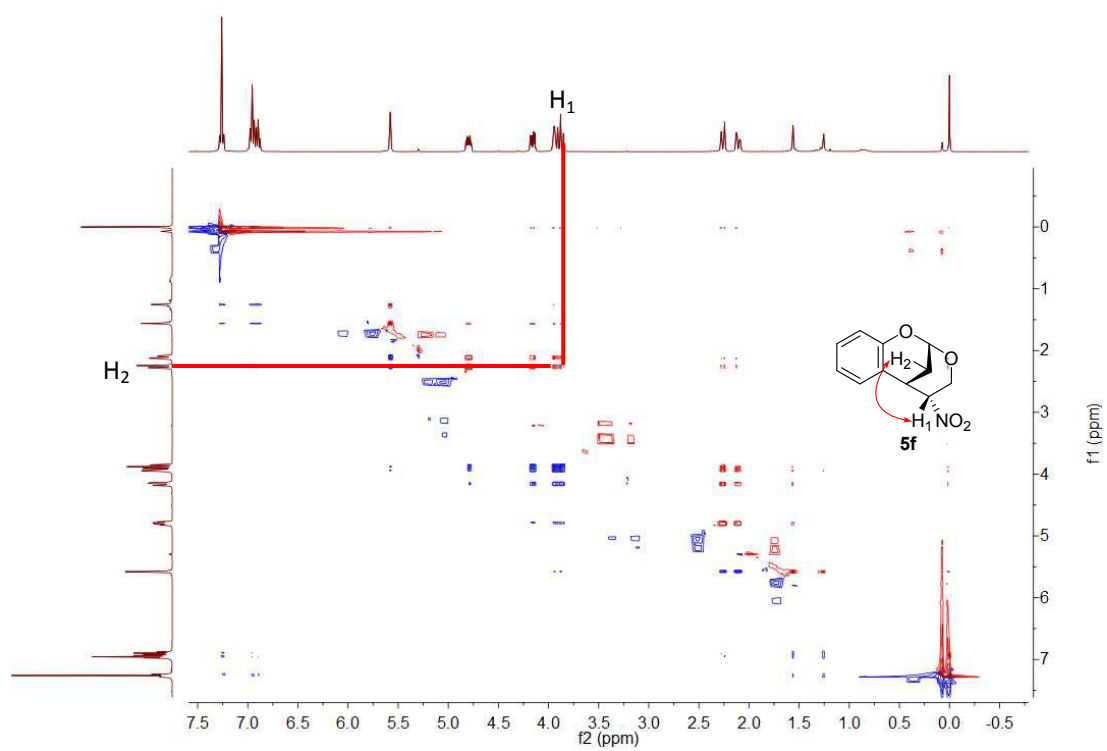



## The HPLC of racemic 5f

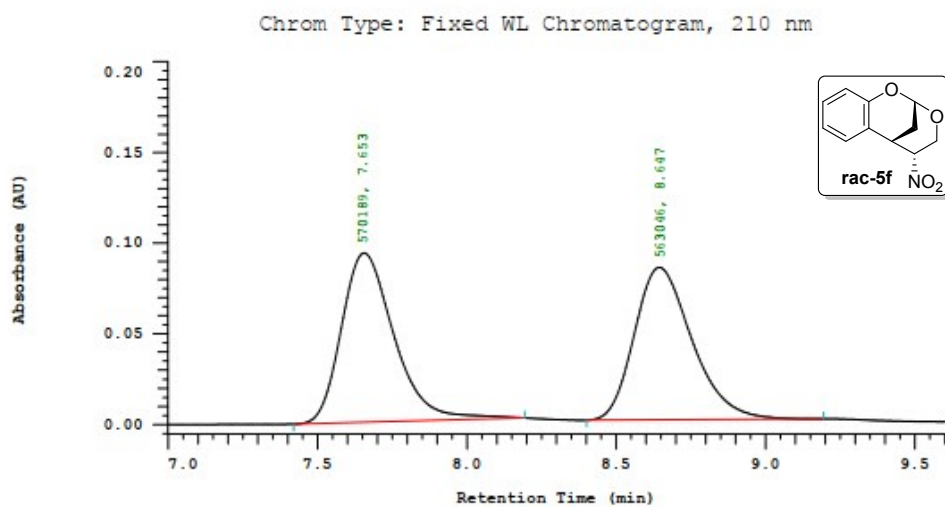

Chrom Type: Fixed WL Chromatogram, 210 nm  
 Peak Quantitation: AREA  
 Calculation Method: AREA%

| No. | RT    | Area    | Area %  | BC |
|-----|-------|---------|---------|----|
| 1   | 7.653 | 570189  | 50.315  | BB |
| 2   | 8.647 | 563046  | 49.685  | BB |
|     |       | 1133235 | 100.000 |    |

## The HPLC of chiral 5f

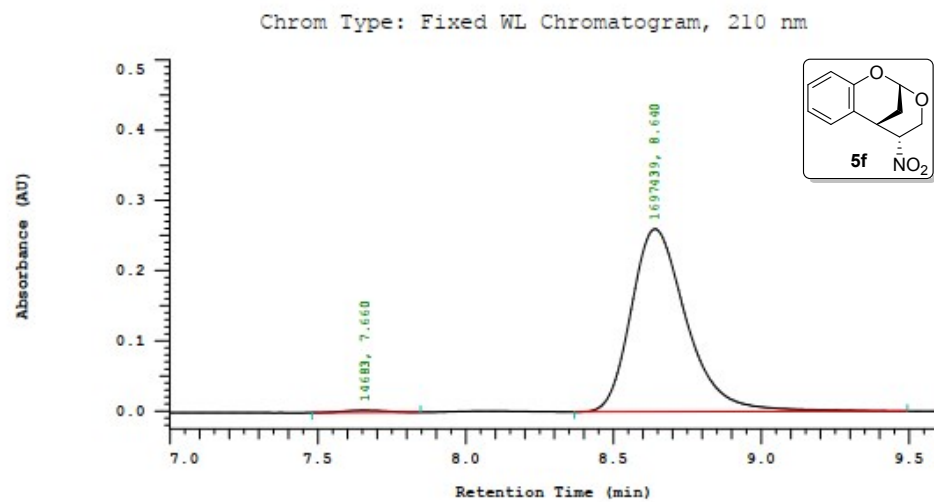

Chrom Type: Fixed WL Chromatogram, 210 nm  
 Peak Quantitation: AREA  
 Calculation Method: AREA%

| No. | RT    | Area    | Area %  | BC |
|-----|-------|---------|---------|----|
| 1   | 7.660 | 14683   | 0.858   | BB |
| 2   | 8.640 | 1697439 | 99.142  | BB |
|     |       | 1712122 | 100.000 |    |

### The $^1\text{H}$ NMR spectrum of **5f** (400 MHz, $\text{CDCl}_3$ )

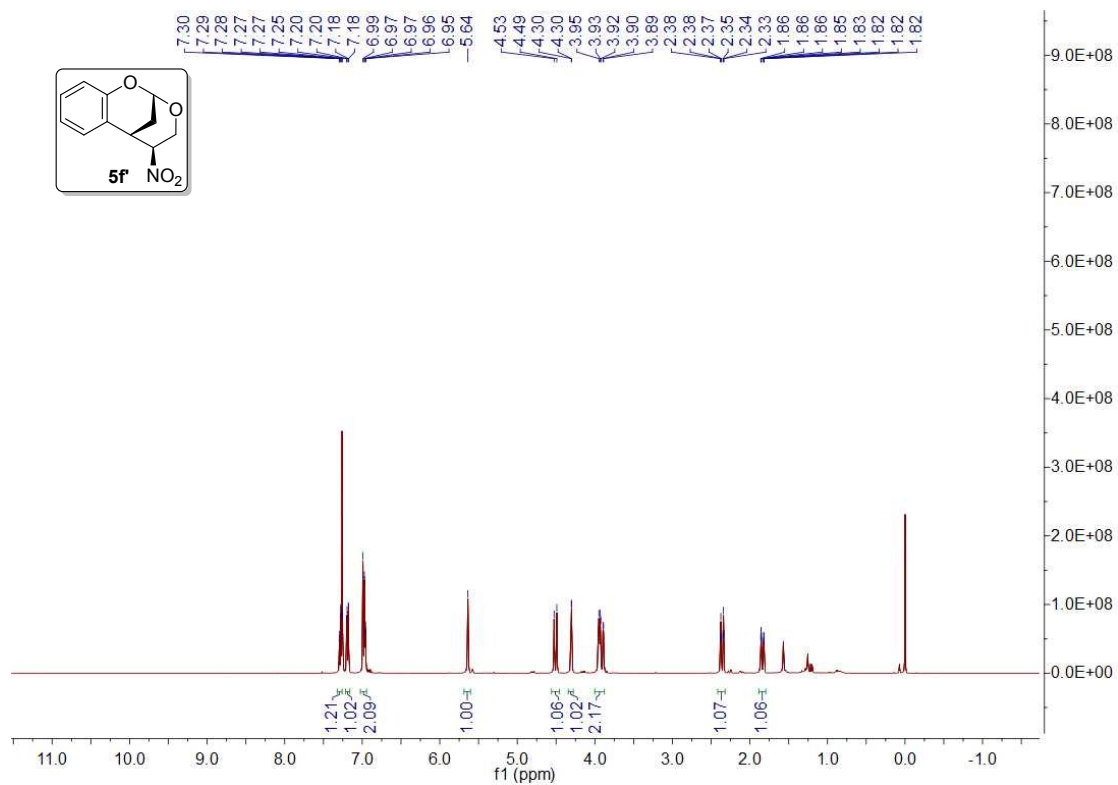

### The $^{13}\text{C}$ NMR spectrum of **5f** (101 MHz, $\text{CDCl}_3$ )

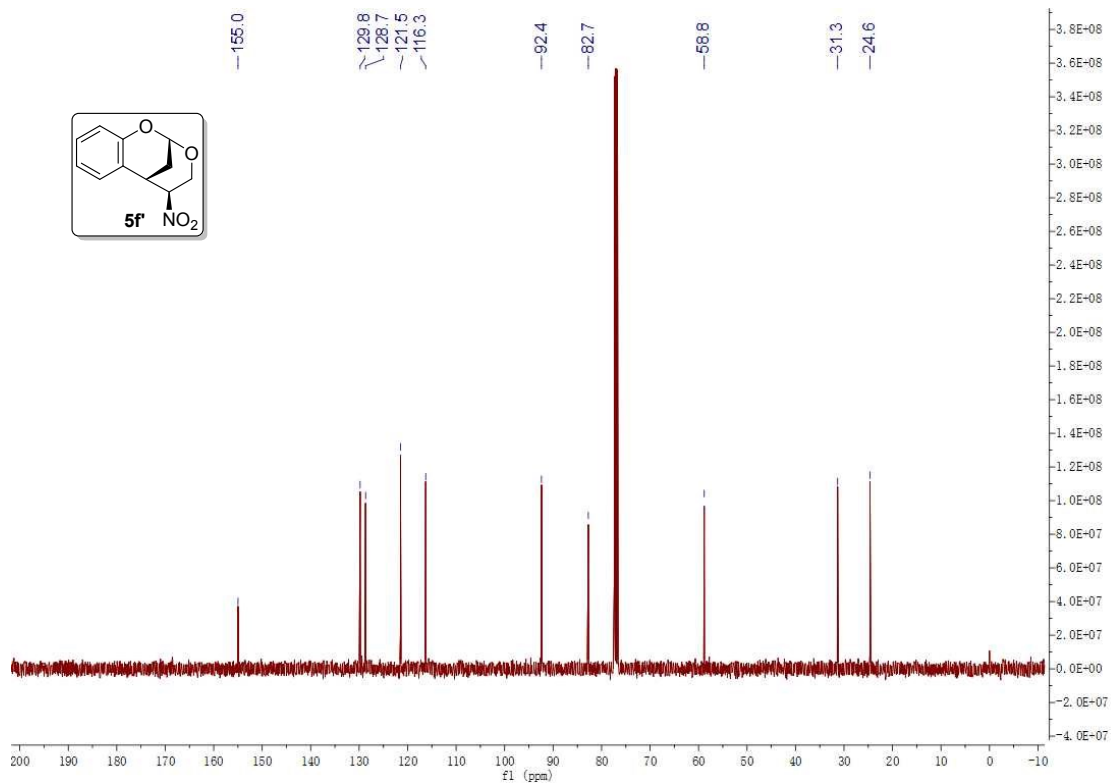

## The HPLC of racemic 5f

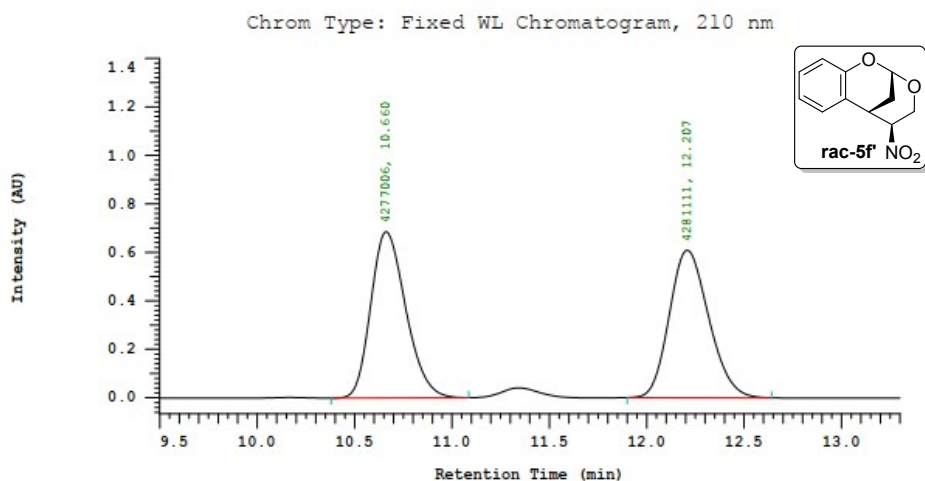

Chrom Type: Fixed WL Chromatogram, 210 nm  
 Peak Quantitation: AREA  
 Calculation Method: AREA%

| No. | RT     | Area    | Area %  | BC |
|-----|--------|---------|---------|----|
| 1   | 10.660 | 4277006 | 49.976  | BB |
| 2   | 12.207 | 4281111 | 50.024  | BB |
|     |        | 8558117 | 100.000 |    |

## The HPLC of chiral 5f

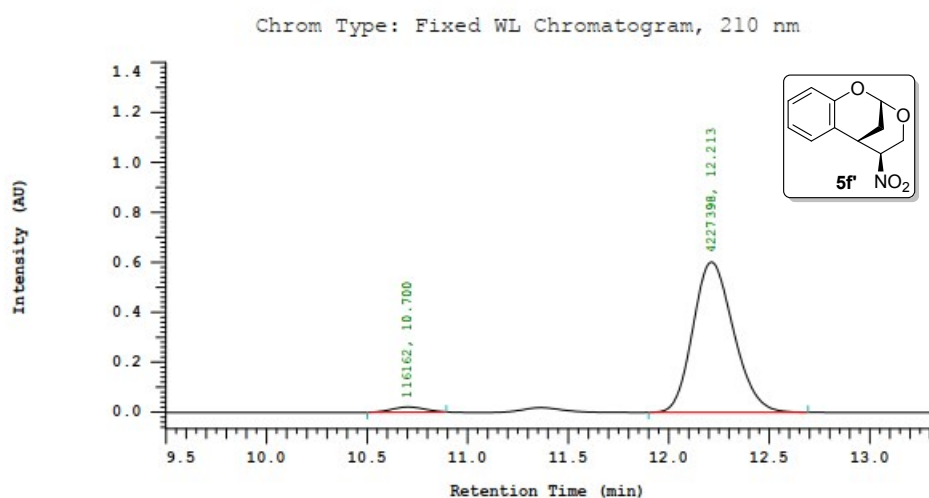

Chrom Type: Fixed WL Chromatogram, 210 nm  
 Peak Quantitation: AREA  
 Calculation Method: AREA%

| No. | RT     | Area    | Area %  | BC |
|-----|--------|---------|---------|----|
| 1   | 10.700 | 116162  | 2.674   | BB |
| 2   | 12.213 | 4227398 | 97.326  | BB |
|     |        | 4343560 | 100.000 |    |

### The $^1\text{H}$ NMR spectrum of 5g (500 MHz, $\text{CDCl}_3$ )

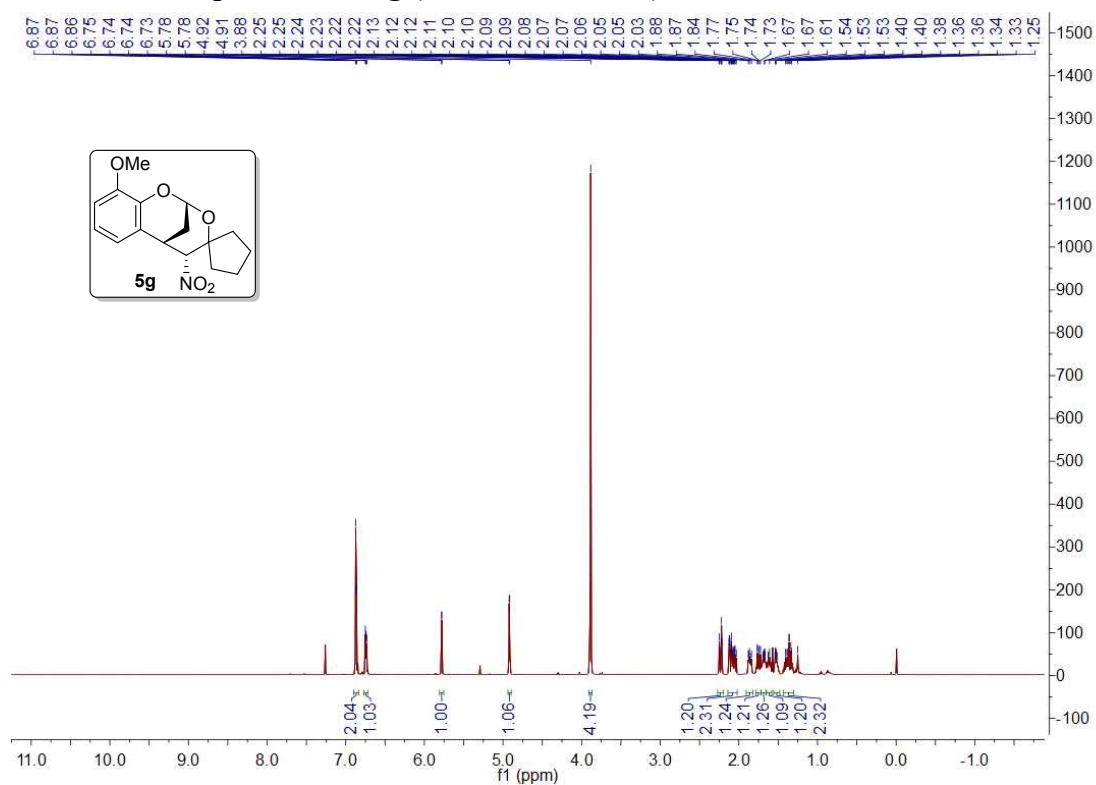

### The $^{13}\text{C}$ NMR spectrum of 5g (125 MHz, $\text{CDCl}_3$ )

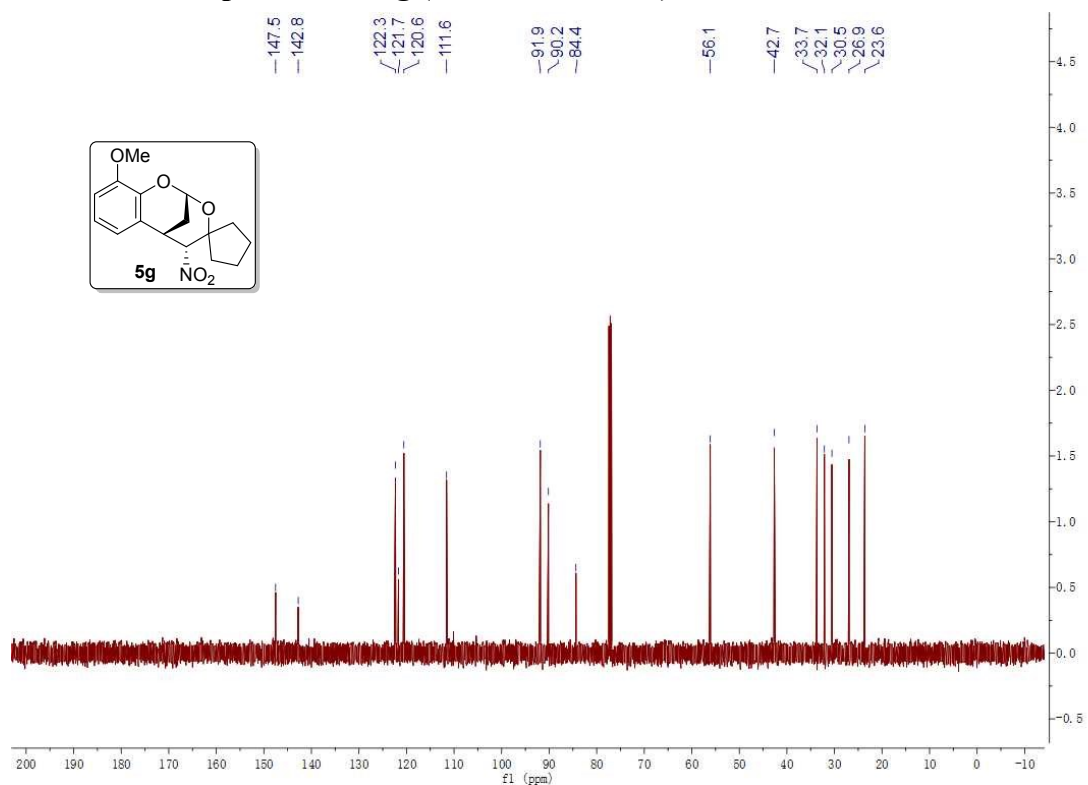

## The HPLC of racemic 5g

Chrom Type: Fixed WL Chromatogram, 210 nm

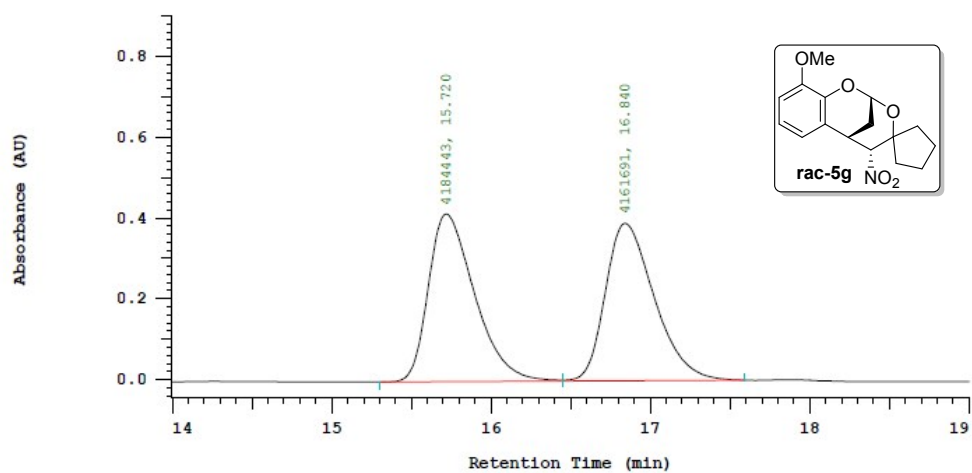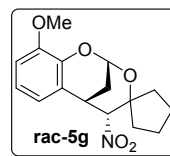

Chrom Type: Fixed WL Chromatogram, 210 nm

Peak Quantitation: AREA  
Calculation Method: AREA%

| No. | RT     | Area    | Area %  | BC |
|-----|--------|---------|---------|----|
| 1   | 15.720 | 4184443 | 50.136  | BV |
| 2   | 16.840 | 4161691 | 49.864  | VB |
|     |        | 8346134 | 100.000 |    |

## The HPLC of chiral 5g

Chrom Type: Fixed WL Chromatogram, 210 nm

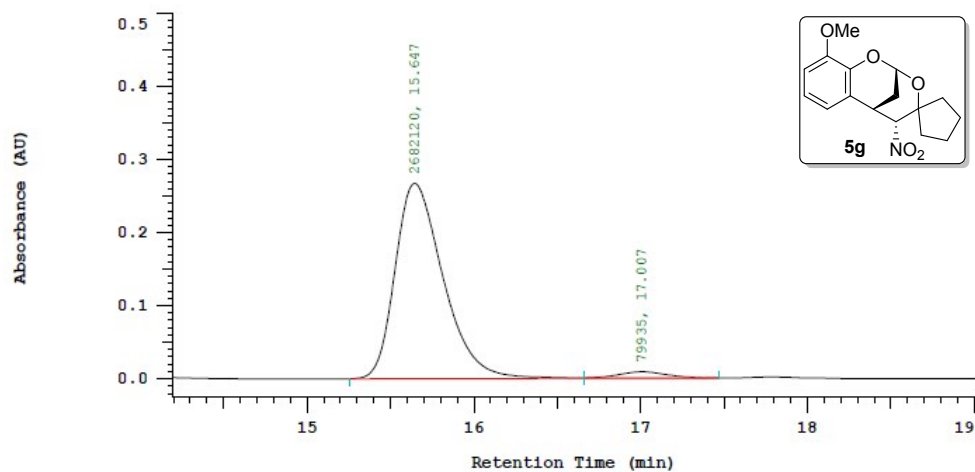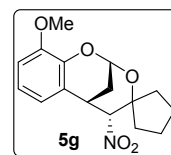

Chrom Type: Fixed WL Chromatogram, 210 nm

Peak Quantitation: AREA  
Calculation Method: AREA%

| No. | RT     | Area    | Area %  | BC  |
|-----|--------|---------|---------|-----|
| 1   | 15.647 | 2682120 | 97.106  | BV  |
| 2   | 17.007 | 79935   | 2.894   | TBB |
|     |        | 2762055 | 100.000 |     |

### The $^1\text{H}$ NMR spectrum of 5h (500 MHz, $\text{CDCl}_3$ )

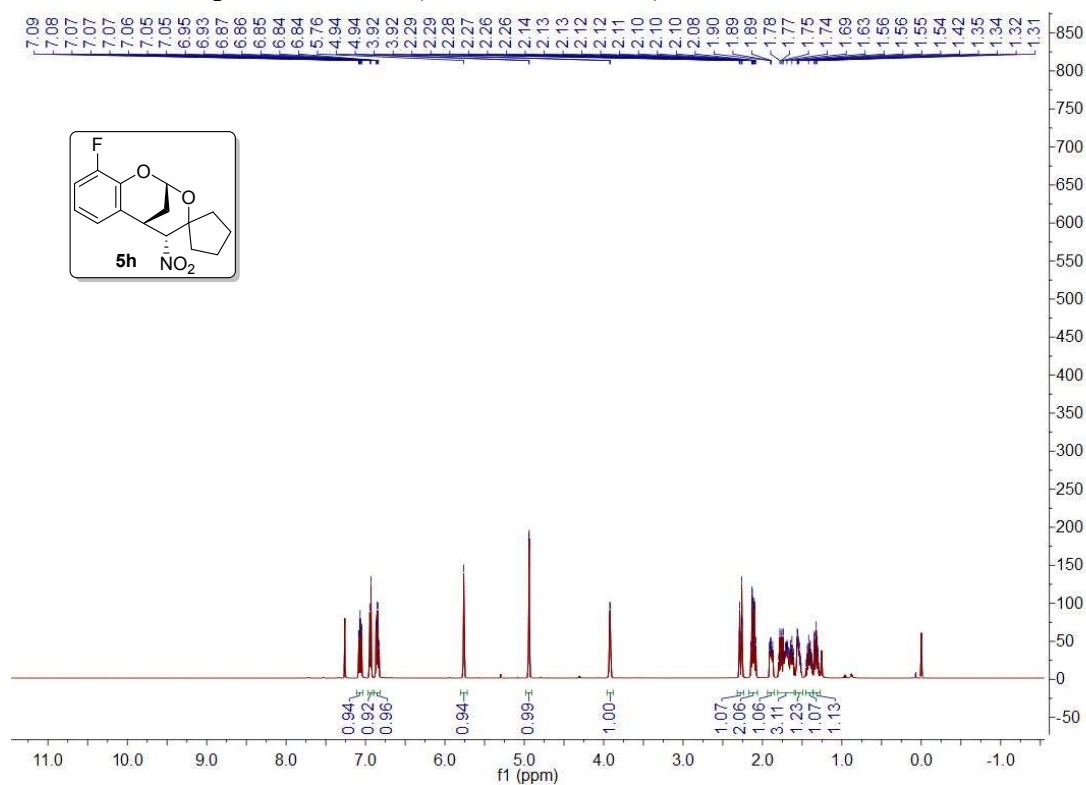

### The $^{13}\text{C}$ NMR spectrum of 5h (125 MHz, $\text{CDCl}_3$ )

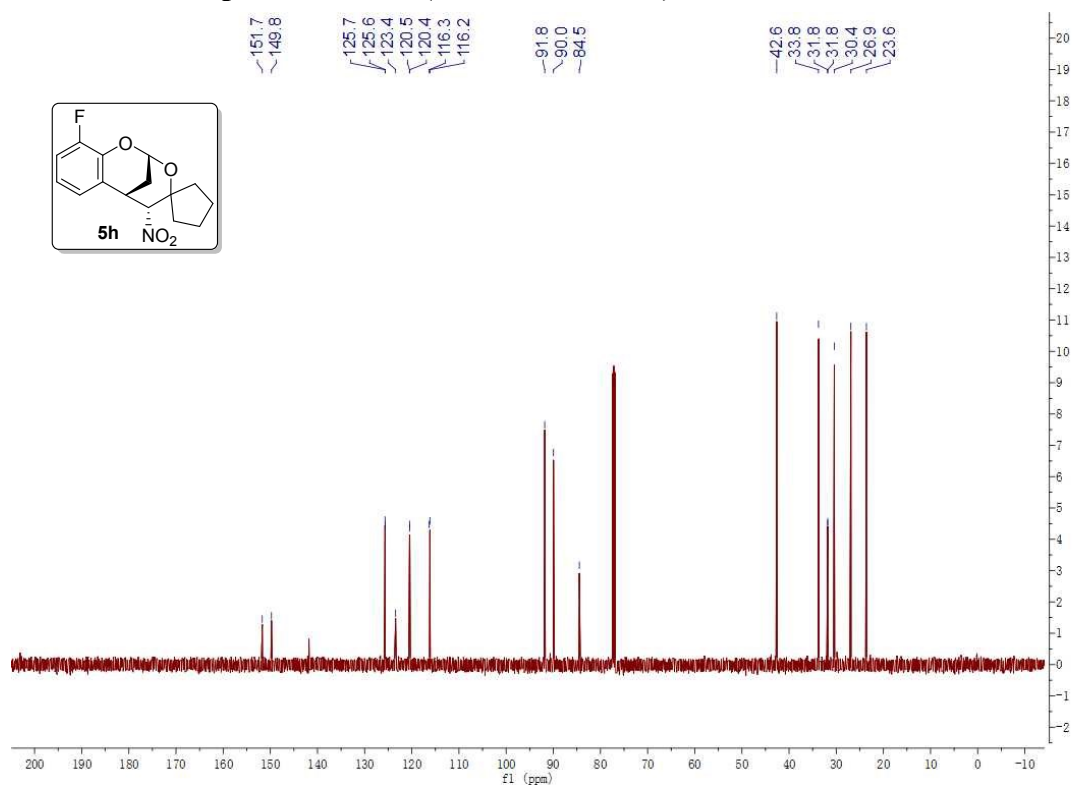

## The HPLC of racemic 5h

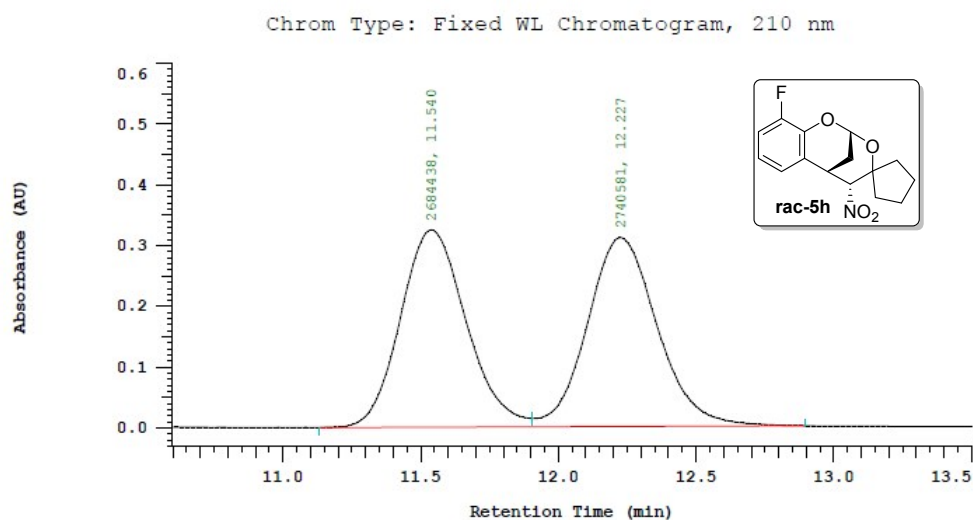

Chrom Type: Fixed WL Chromatogram, 210 nm  
 Peak Quantitation: AREA  
 Calculation Method: AREA%

| No. | RT     | Area    | Area %  | BC |
|-----|--------|---------|---------|----|
| 1   | 11.540 | 2684438 | 49.483  | BV |
| 2   | 12.227 | 2740581 | 50.517  | VB |
|     |        | 5425019 | 100.000 |    |

## The HPLC of chiral 5h

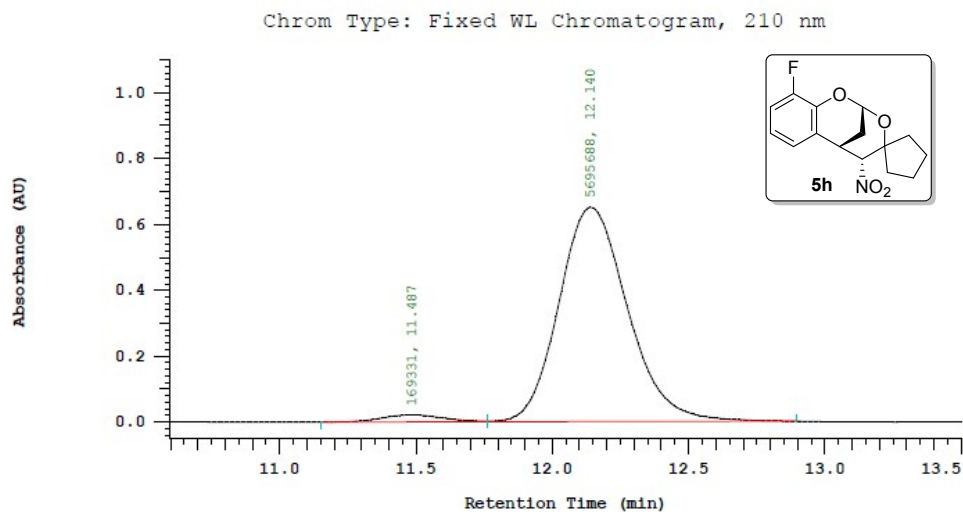

Chrom Type: Fixed WL Chromatogram, 210 nm  
 Peak Quantitation: AREA  
 Calculation Method: AREA%

| No. | RT     | Area    | Area %  | BC |
|-----|--------|---------|---------|----|
| 1   | 11.487 | 169331  | 2.887   | BV |
| 2   | 12.140 | 5695688 | 97.113  | VB |
|     |        | 5865019 | 100.000 |    |

### The $^1\text{H}$ NMR spectrum of **5i** (500 MHz, $\text{CDCl}_3$ )

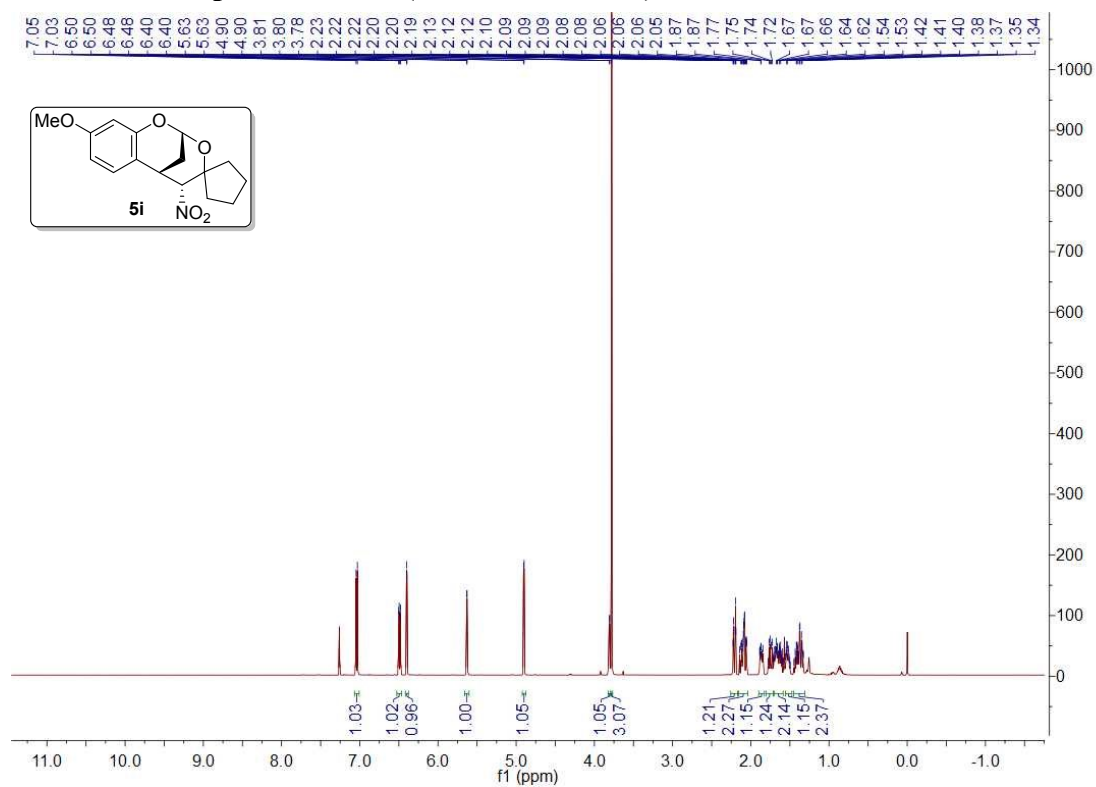

### The $^{13}\text{C}$ NMR spectrum of **5i** (125 MHz, $\text{CDCl}_3$ )

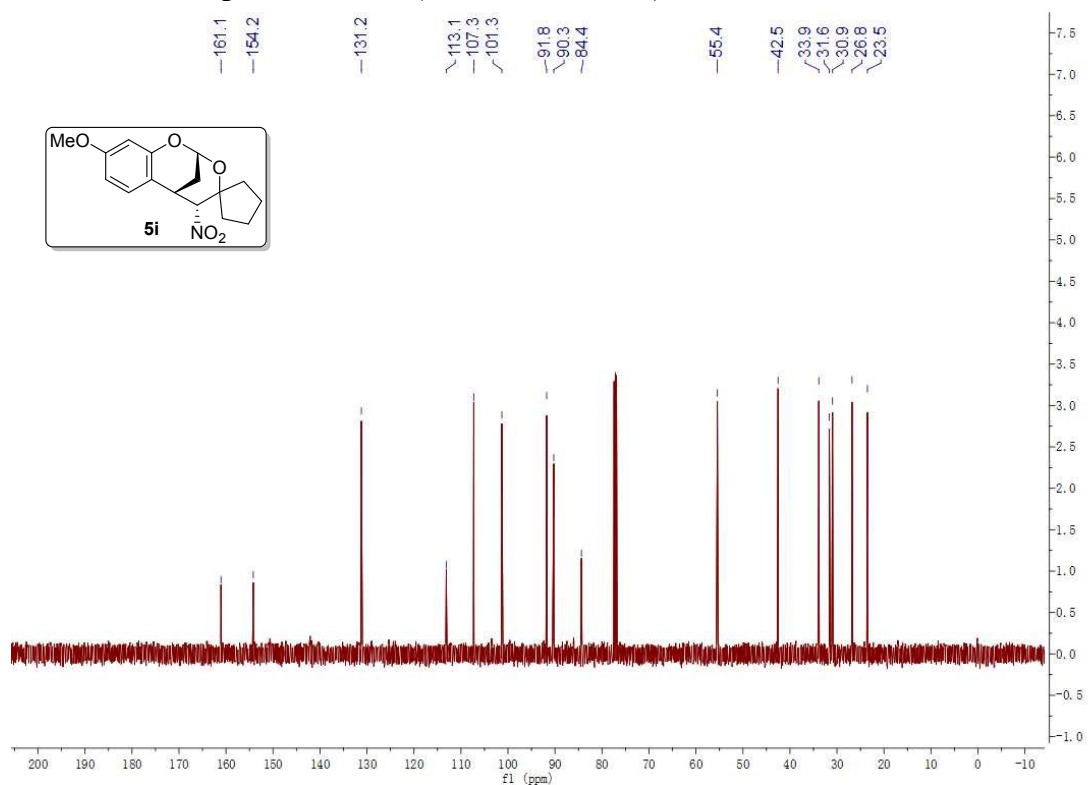



## The HPLC of racemic 5i

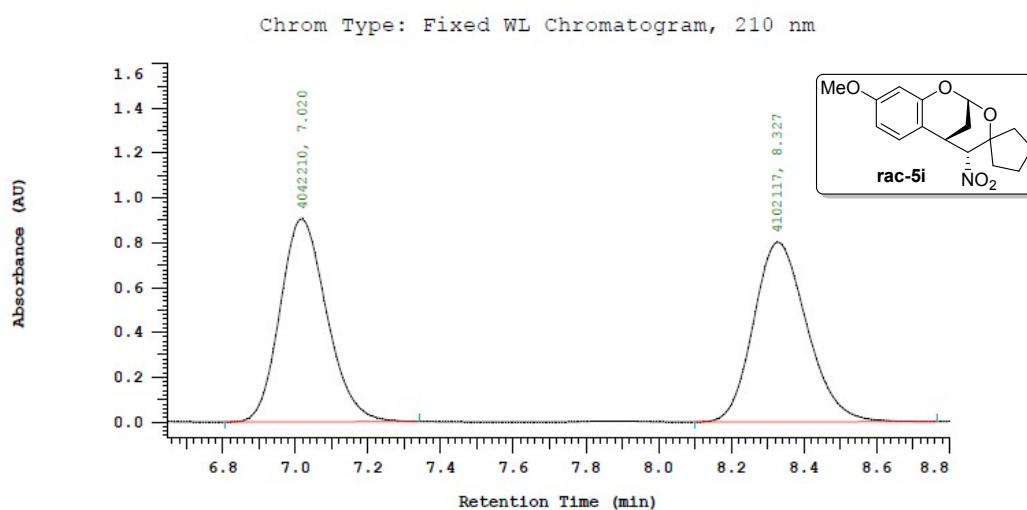

Chrom Type: Fixed WL Chromatogram, 210 nm  
 Peak Quantitation: AREA  
 Calculation Method: AREA%

| No. | RT    | Area    | Area %  | BC |
|-----|-------|---------|---------|----|
| 1   | 7.020 | 4042210 | 49.632  | BB |
| 2   | 8.327 | 4102117 | 50.368  | BB |
|     |       | 8144327 | 100.000 |    |

## The HPLC of chiral 5i

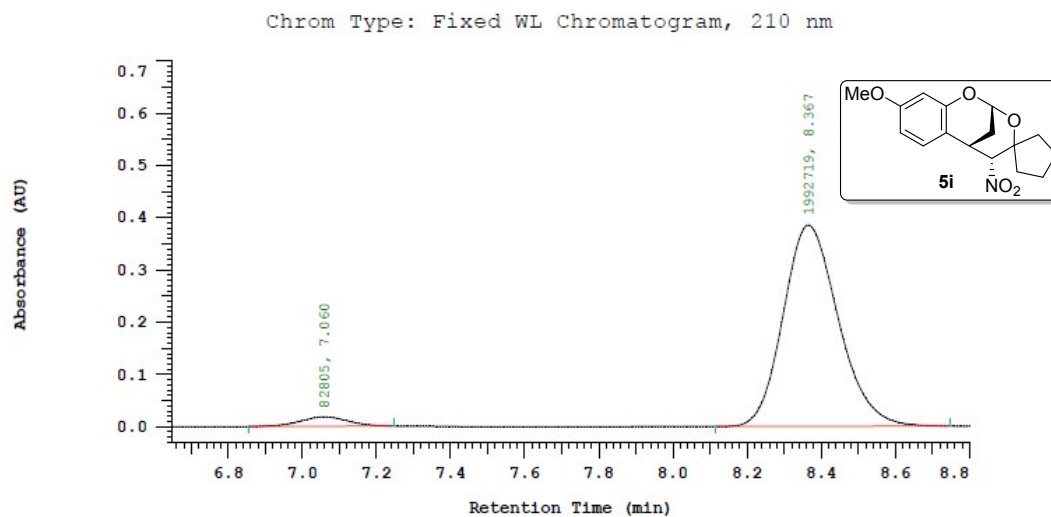

Chrom Type: Fixed WL Chromatogram, 210 nm  
 Peak Quantitation: AREA  
 Calculation Method: AREA%

| No. | RT    | Area    | Area %  | BC |
|-----|-------|---------|---------|----|
| 1   | 7.060 | 82805   | 3.990   | BB |
| 2   | 8.367 | 1992719 | 96.010  | BB |
|     |       | 2075524 | 100.000 |    |

### The $^1\text{H}$ NMR spectrum of **5j** (500 MHz, $\text{CDCl}_3$ )

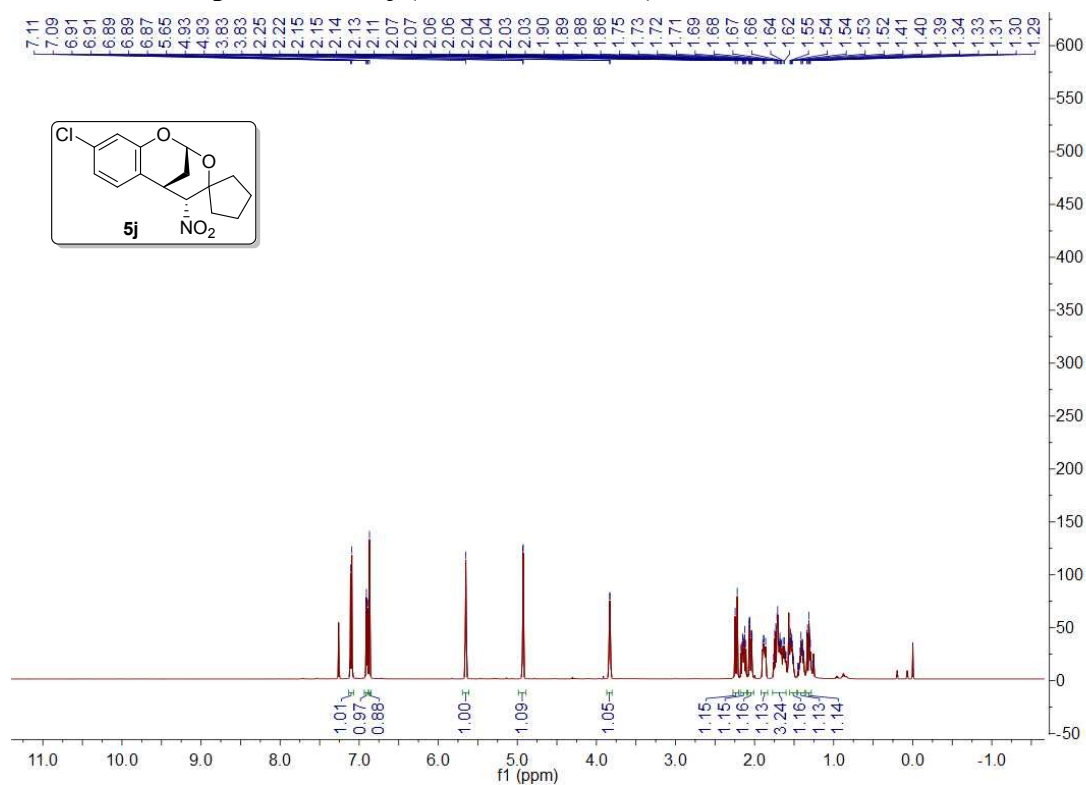

### The $^{13}\text{C}$ NMR spectrum of **5j** (125 MHz, $\text{CDCl}_3$ )

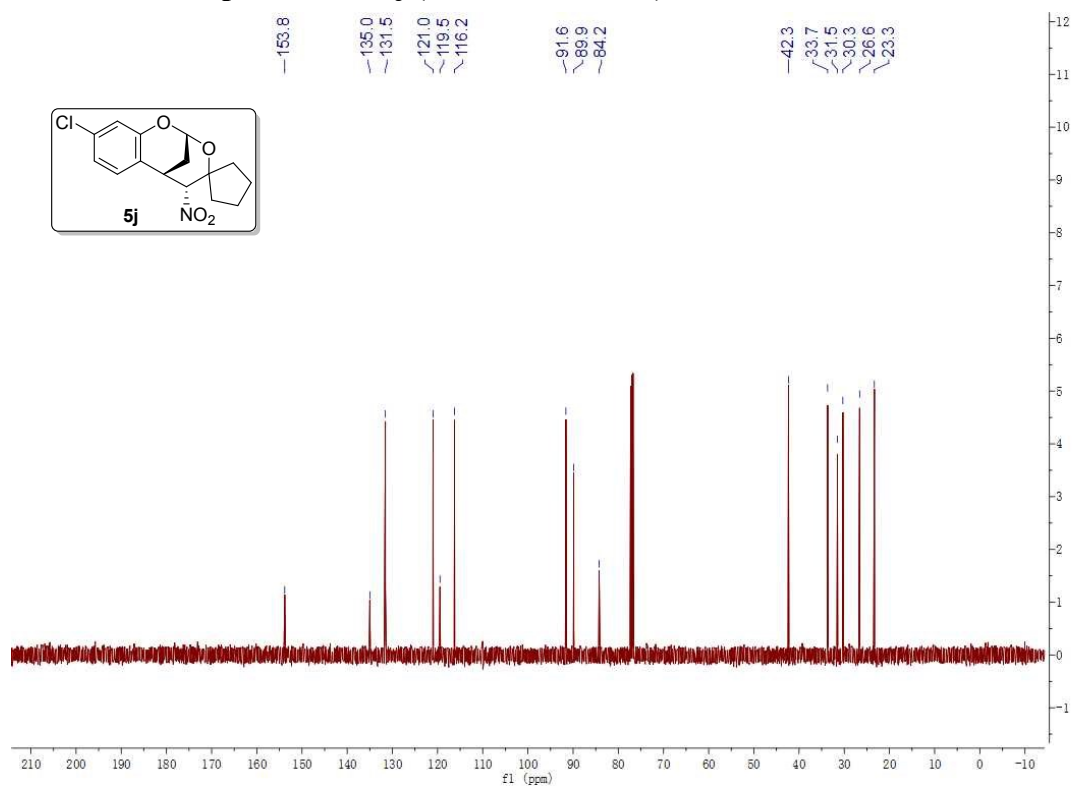

## The HPLC of racemic 5j

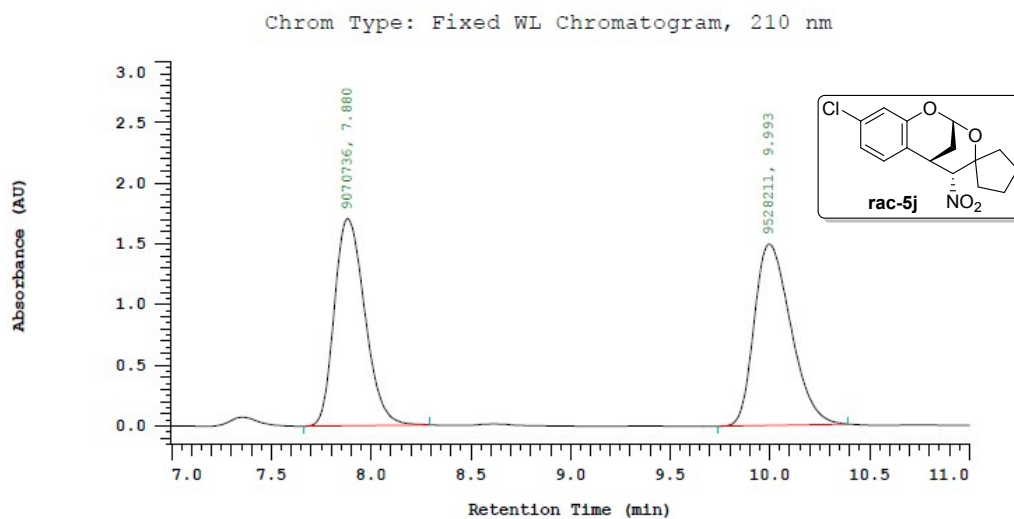

Chrom Type: Fixed WL Chromatogram, 210 nm  
 Peak Quantitation: AREA  
 Calculation Method: AREA%

| No. | RT    | Area     | Area %  | BC |
|-----|-------|----------|---------|----|
| 1   | 7.880 | 9070736  | 48.770  | BB |
| 2   | 9.993 | 9528211  | 51.230  | BB |
|     |       | 18598947 | 100.000 |    |

## The HPLC of chiral 5j

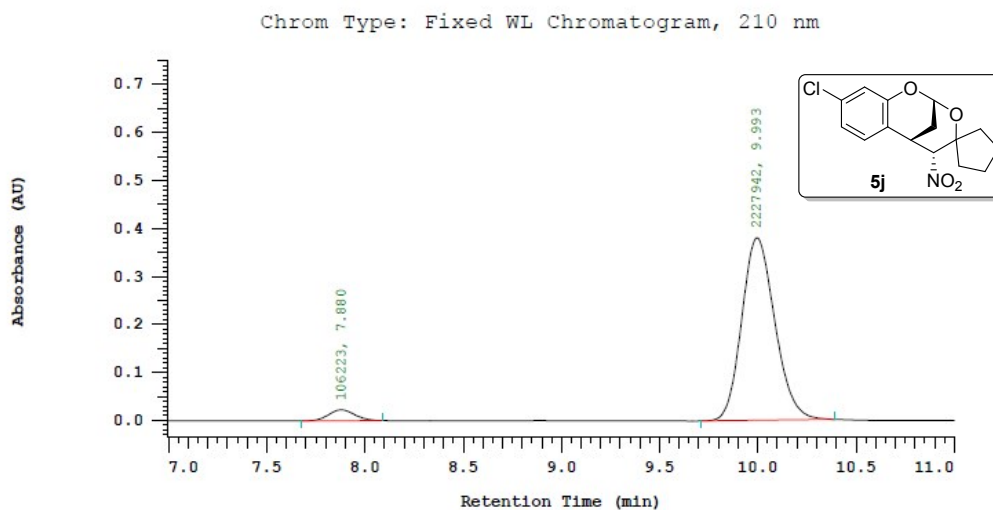

Chrom Type: Fixed WL Chromatogram, 210 nm  
 Peak Quantitation: AREA  
 Calculation Method: AREA%

| No. | RT    | Area    | Area %  | BC |
|-----|-------|---------|---------|----|
| 1   | 7.880 | 106223  | 4.551   | BB |
| 2   | 9.993 | 2227942 | 95.449  | BB |
|     |       | 2334165 | 100.000 |    |

### The $^1\text{H}$ NMR spectrum of 5k (500 MHz, $\text{CDCl}_3$ )

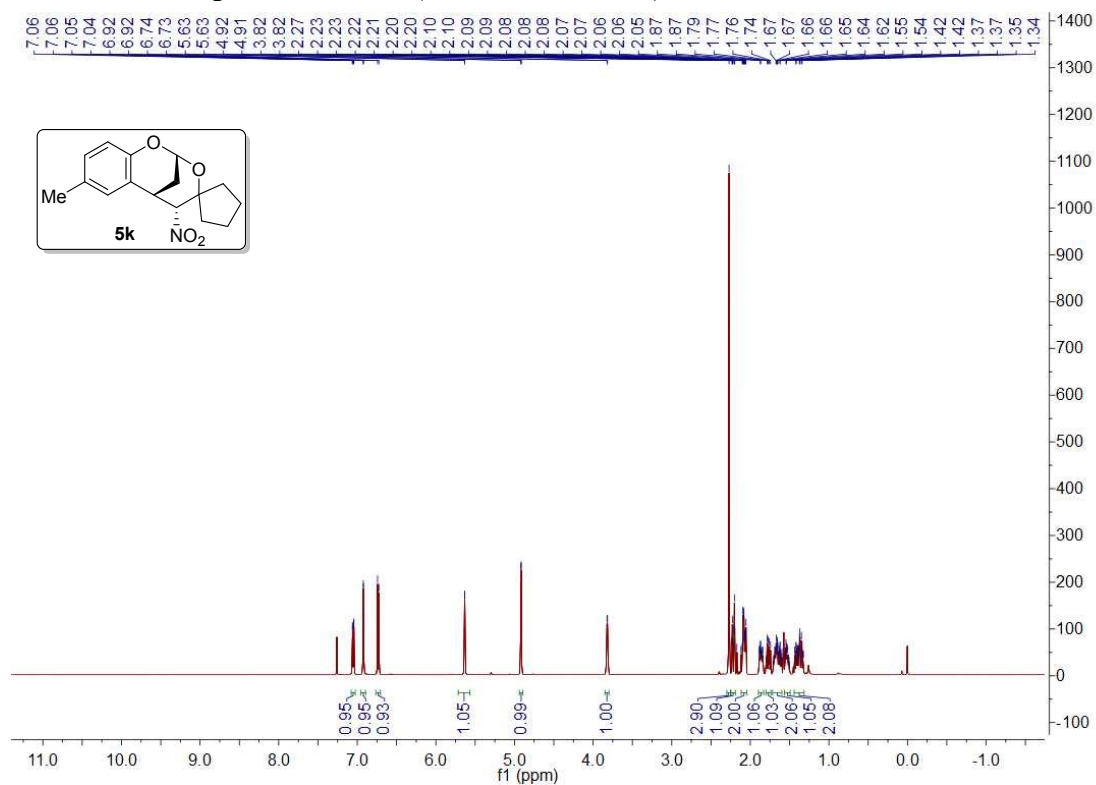

### The $^{13}\text{C}$ NMR spectrum of 5k (125 MHz, $\text{CDCl}_3$ )

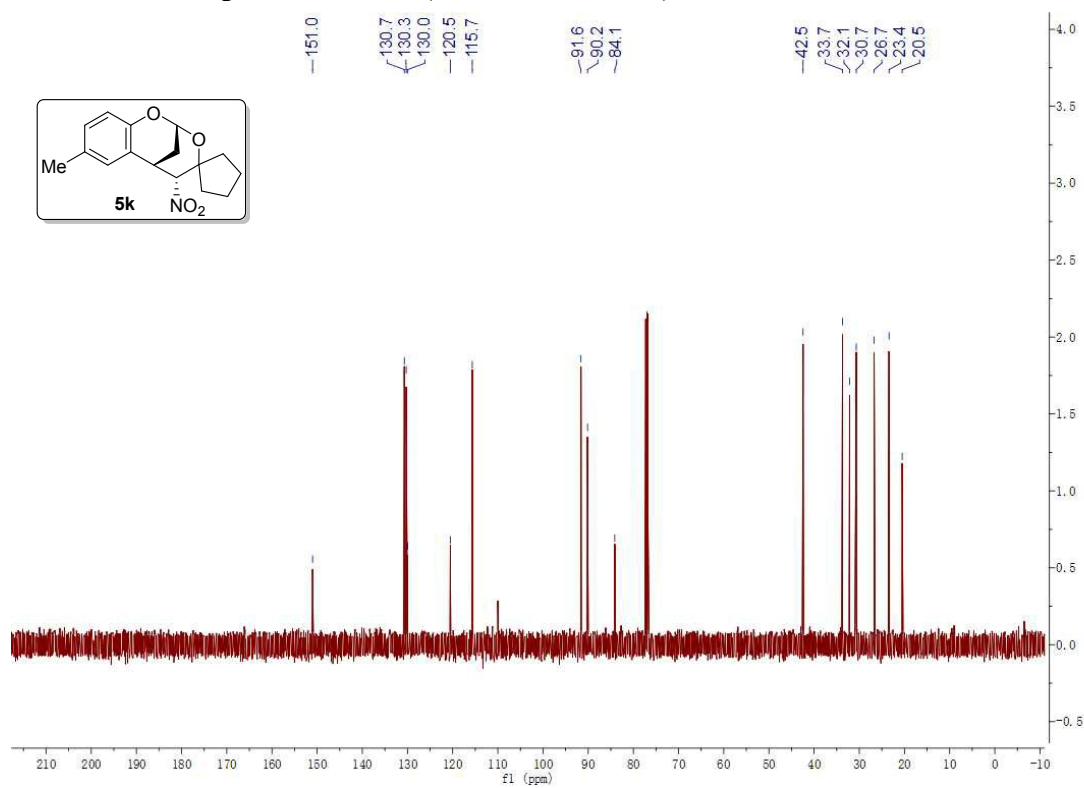

## The HPLC of racemic 5k

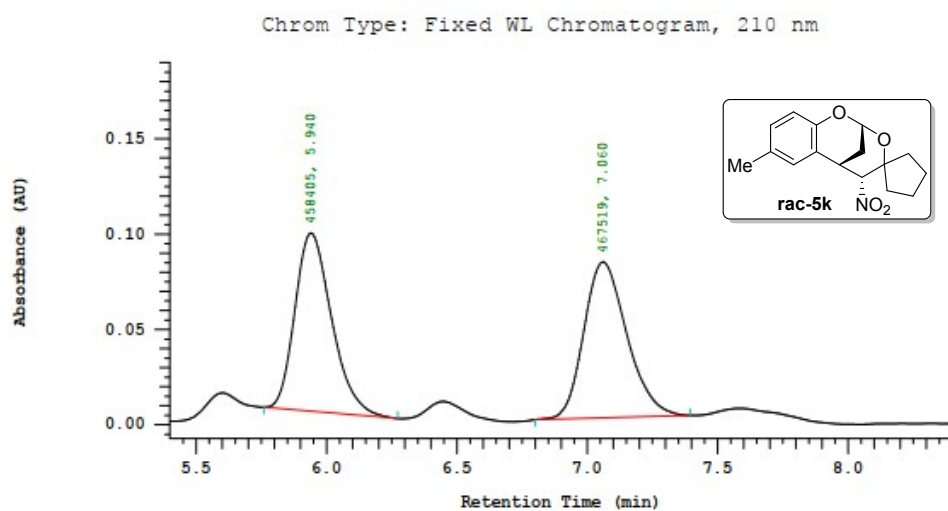

## The HPLC of chiral 5k

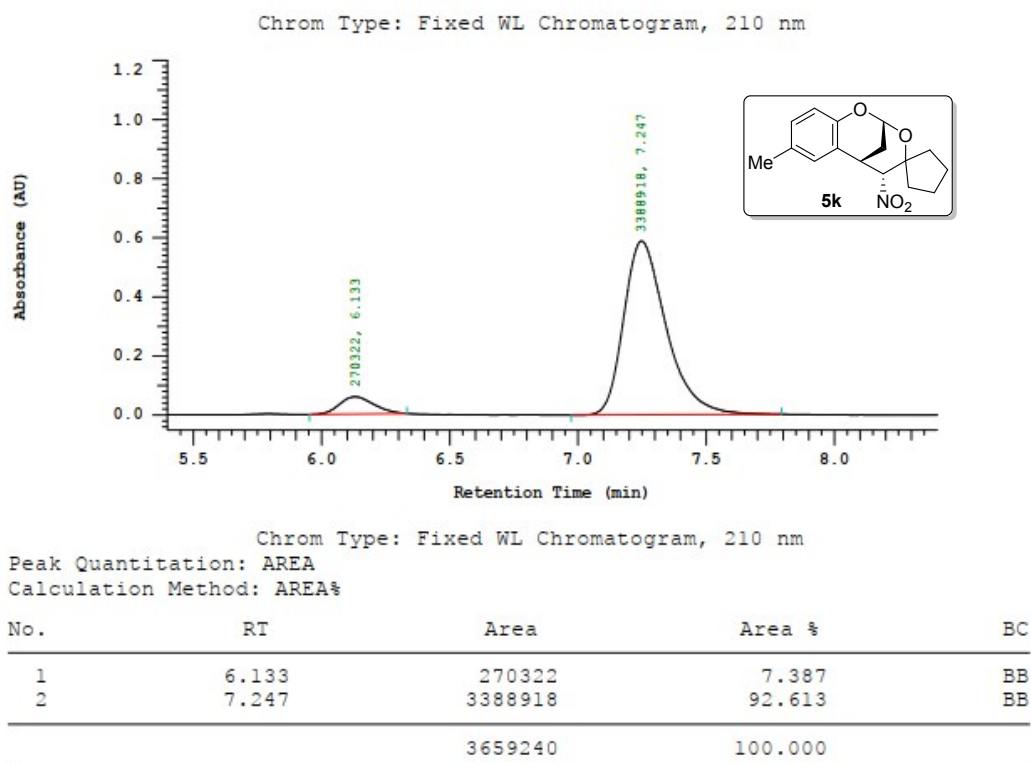

### The $^1\text{H}$ NMR spectrum of 5I (500 MHz, $\text{CDCl}_3$ )

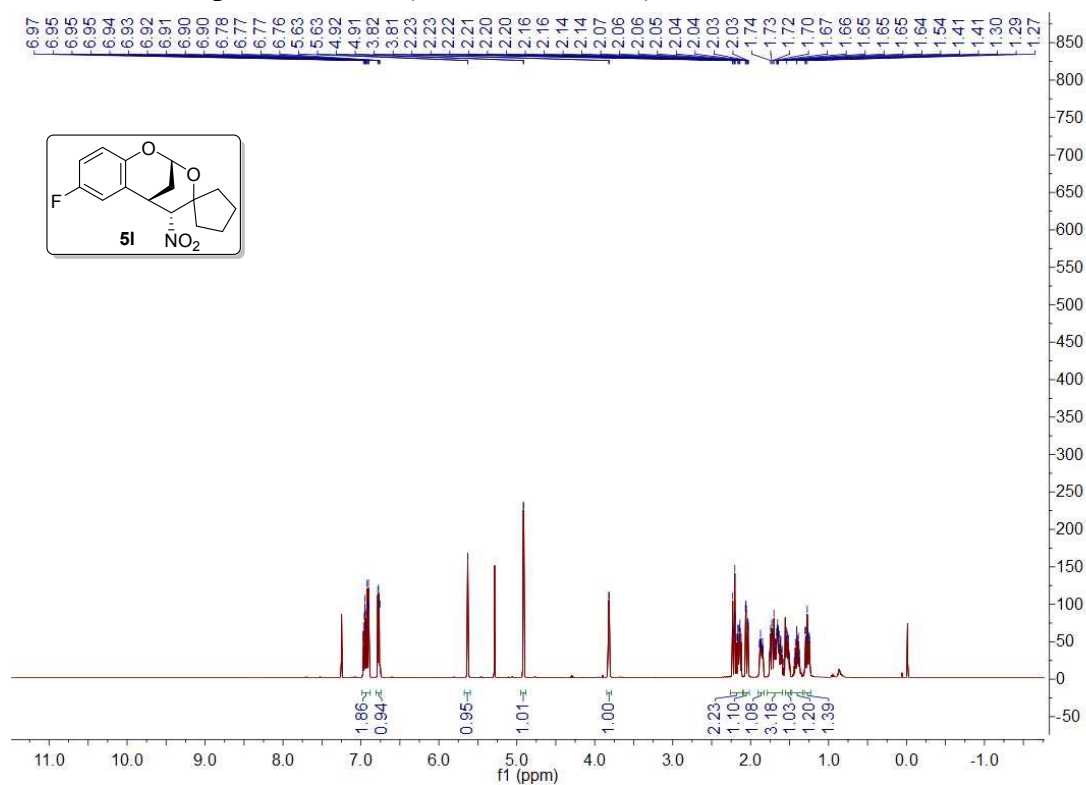

### The $^{13}\text{C}$ NMR spectrum of 5I (125 MHz, $\text{CDCl}_3$ )

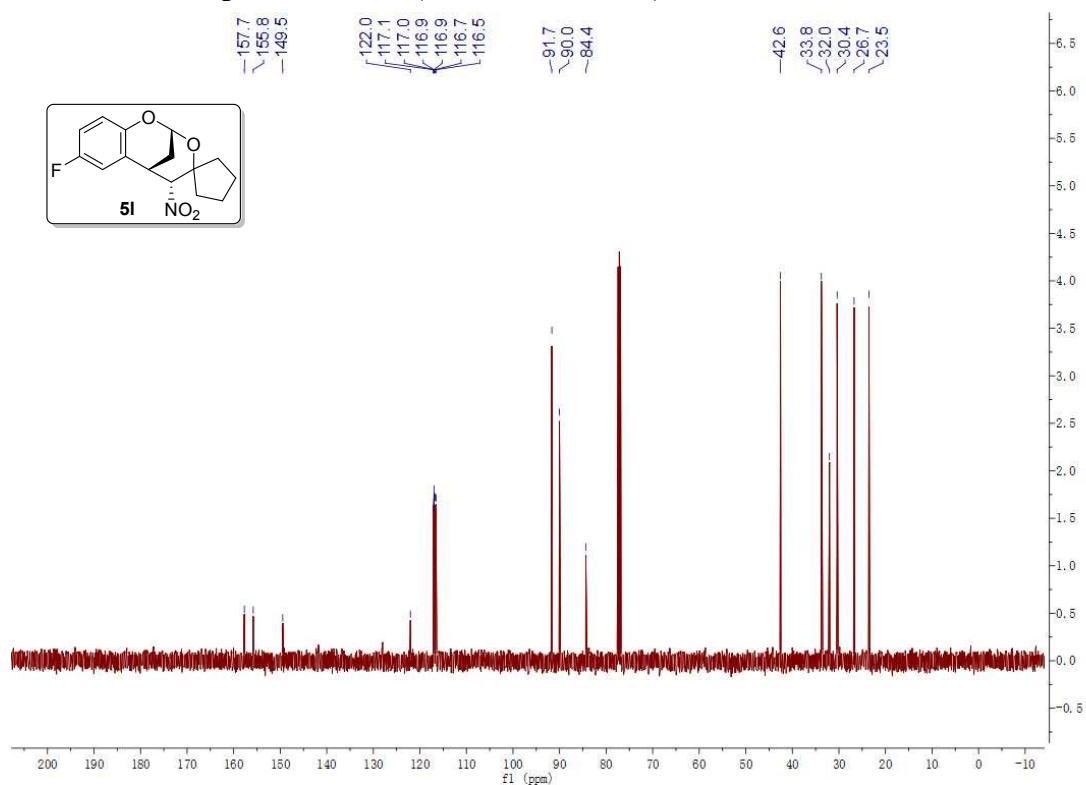

## The HPLC of racemic 5I

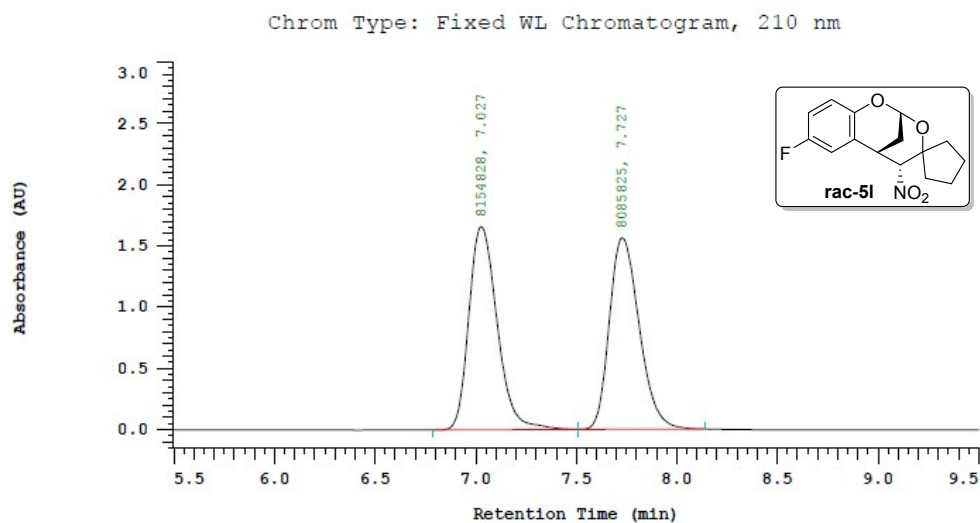

Chrom Type: Fixed WL Chromatogram, 210 nm  
 Peak Quantitation: AREA  
 Calculation Method: AREA%

| No. | RT    | Area     | Area %  | BC |
|-----|-------|----------|---------|----|
| 1   | 7.027 | 8154828  | 50.212  | BV |
| 2   | 7.727 | 8085825  | 49.788  | VB |
|     |       | 16240653 | 100.000 |    |

## The HPLC of chiral 5I

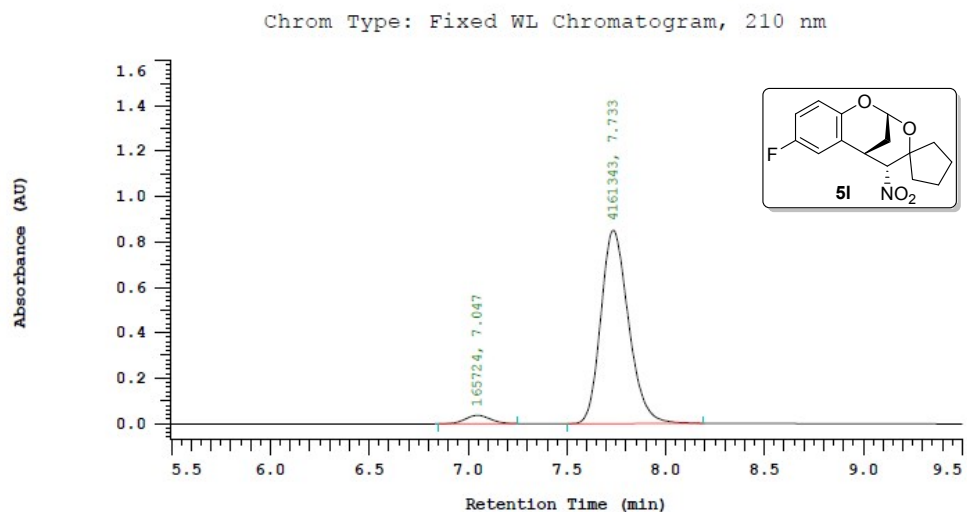

Chrom Type: Fixed WL Chromatogram, 210 nm  
 Peak Quantitation: AREA  
 Calculation Method: AREA%

| No. | RT    | Area    | Area %  | BC |
|-----|-------|---------|---------|----|
| 1   | 7.047 | 165724  | 3.830   | BB |
| 2   | 7.733 | 4161343 | 96.170  | BB |
|     |       | 4327067 | 100.000 |    |

### The $^1\text{H}$ NMR spectrum of 5m (500 MHz, $\text{CDCl}_3$ )

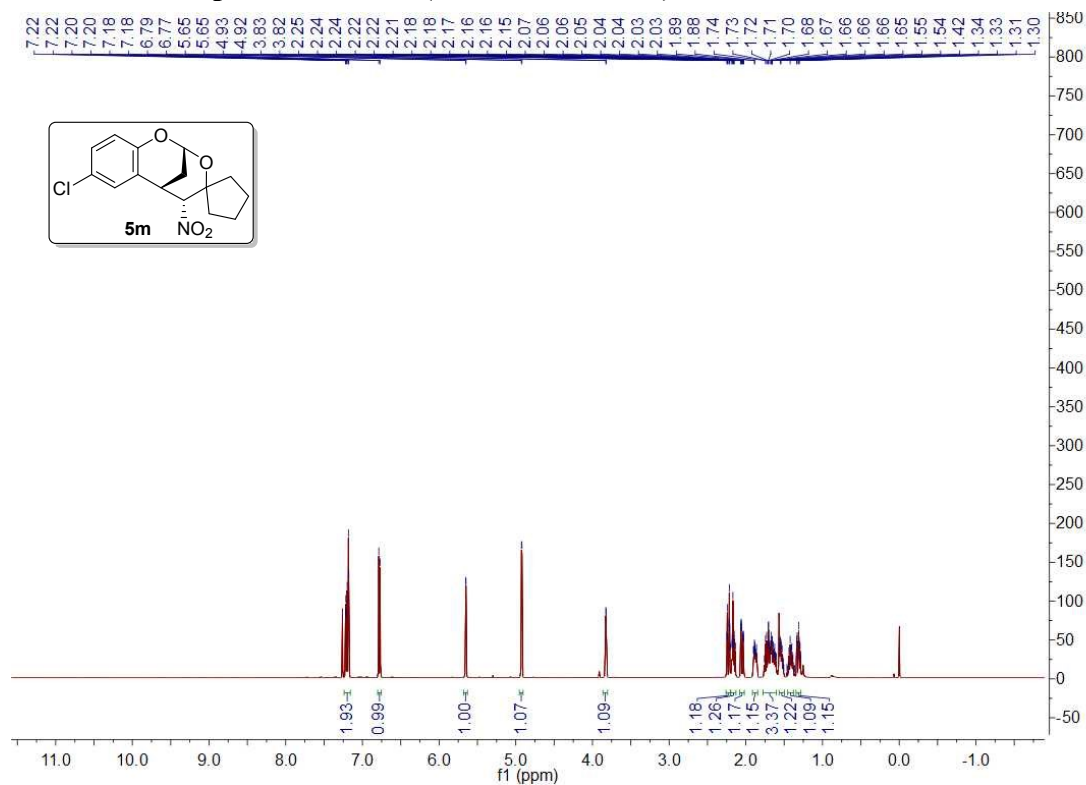

### The $^{13}\text{C}$ NMR spectrum of 5m (125 MHz, $\text{CDCl}_3$ )

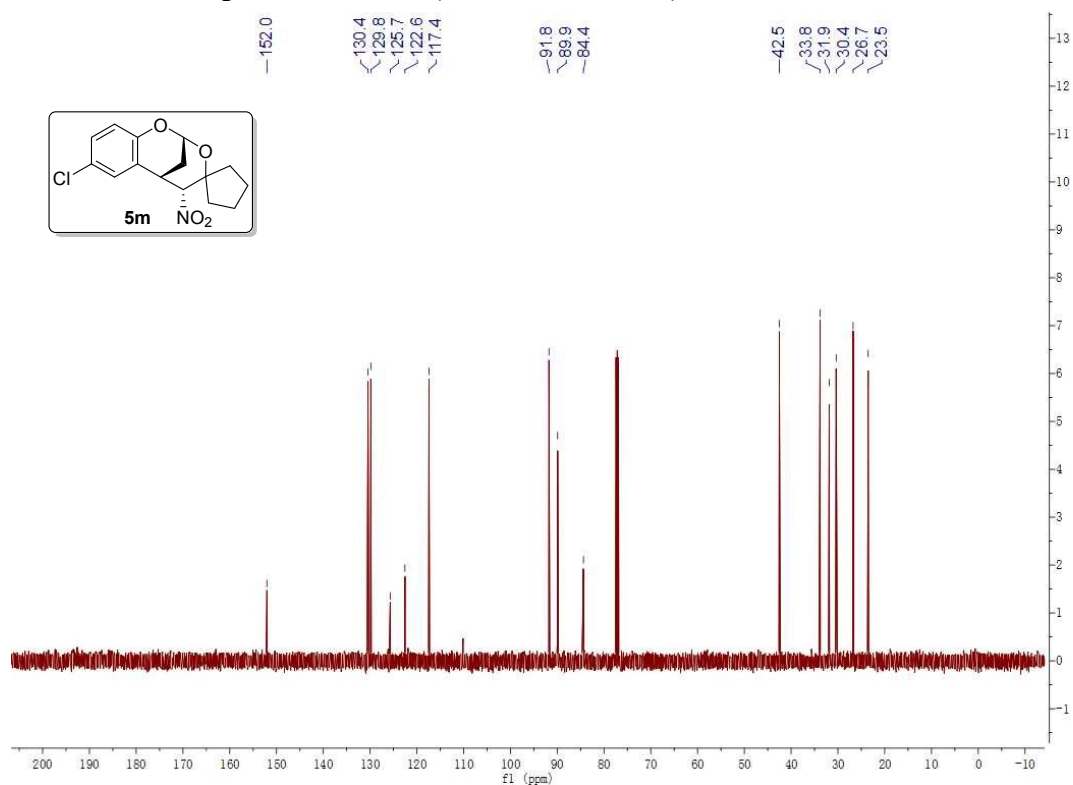



## The HPLC of racemic 5m

Chrom Type: Fixed WL Chromatogram, 210 nm

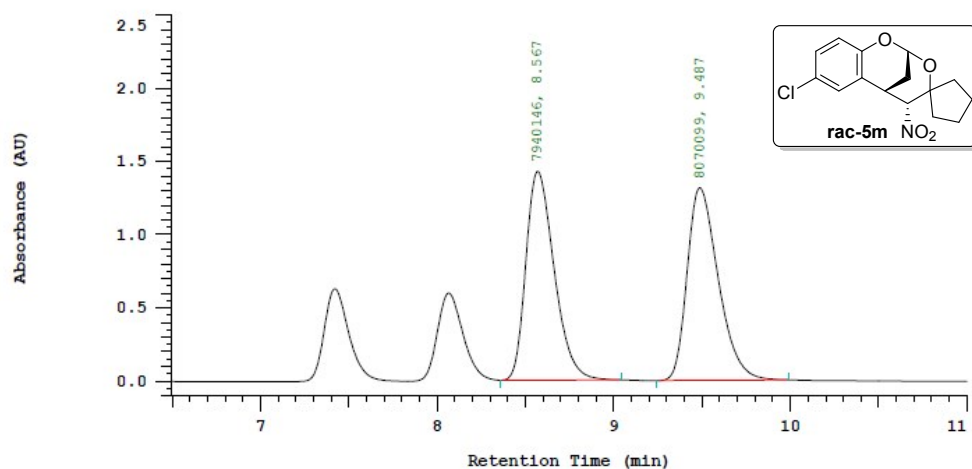

Chrom Type: Fixed WL Chromatogram, 210 nm

Peak Quantitation: AREA  
Calculation Method: AREA%

| No. | RT    | Area     | Area %  | BC |
|-----|-------|----------|---------|----|
| 1   | 8.567 | 7940146  | 49.594  | BB |
| 2   | 9.487 | 8070099  | 50.406  | BB |
|     |       | 16010245 | 100.000 |    |

## The HPLC of chiral 5m

Chrom Type: Fixed WL Chromatogram, 210 nm

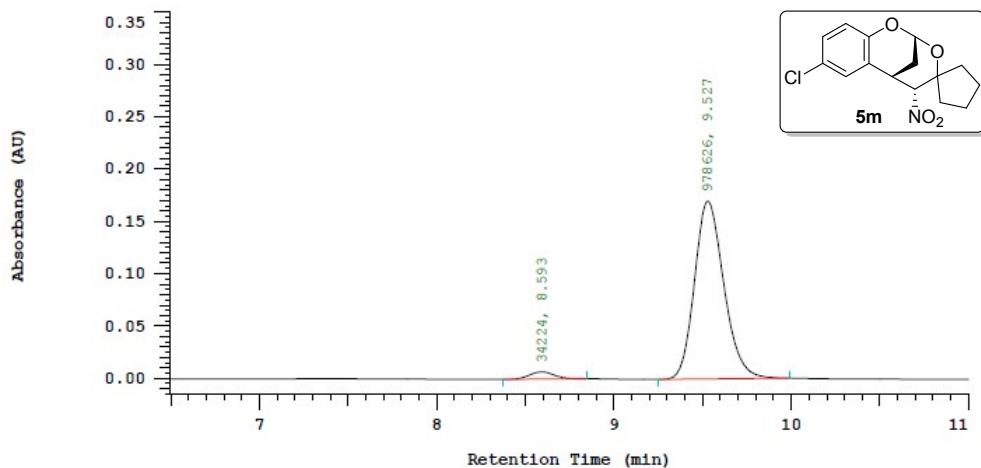

Chrom Type: Fixed WL Chromatogram, 210 nm

Peak Quantitation: AREA  
Calculation Method: AREA%

| No. | RT    | Area    | Area %  | BC |
|-----|-------|---------|---------|----|
| 1   | 8.593 | 34224   | 3.379   | BB |
| 2   | 9.527 | 978626  | 96.621  | BB |
|     |       | 1012850 | 100.000 |    |

### The $^1\text{H}$ NMR spectrum of **5n** (500 MHz, $\text{CDCl}_3$ )

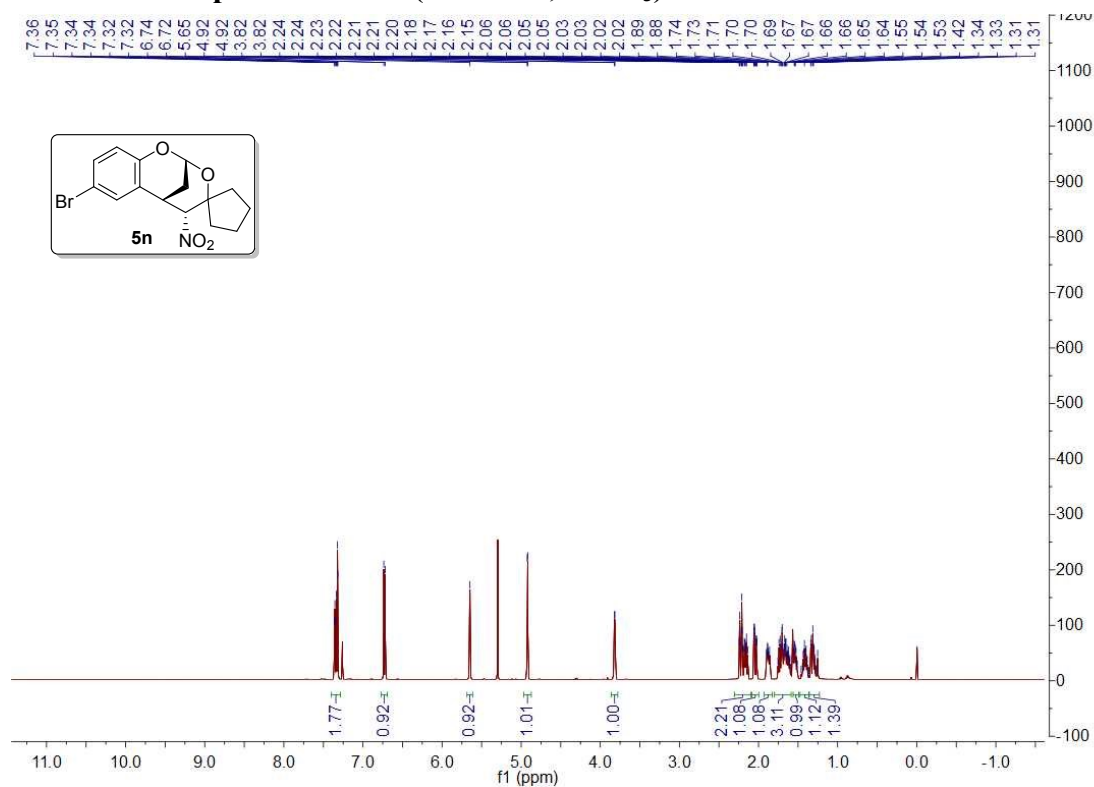

### The $^{13}\text{C}$ NMR spectrum of **5n** (125 MHz, $\text{CDCl}_3$ )

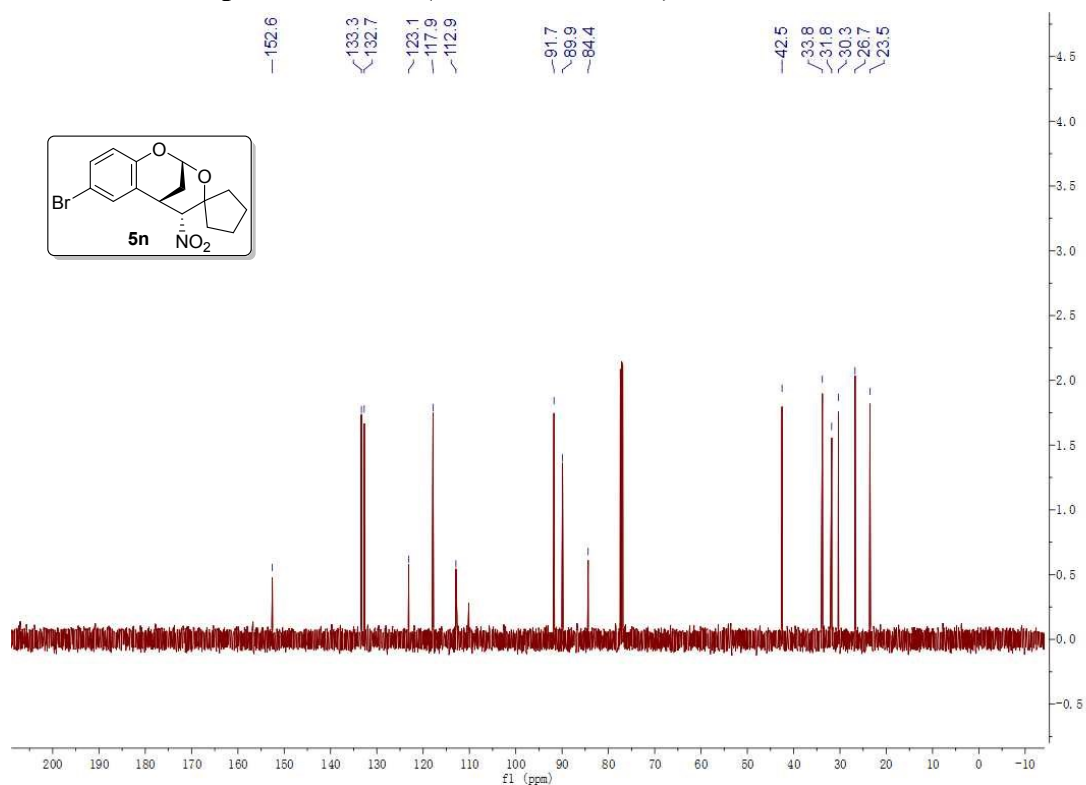

## The HPLC of racemic 5n

Chrom Type: Fixed WL Chromatogram, 210 nm

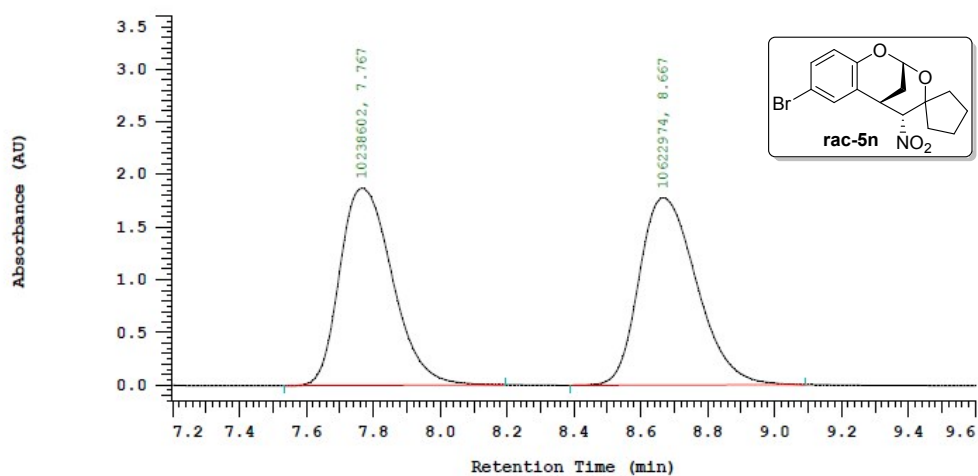

Chrom Type: Fixed WL Chromatogram, 210 nm

Peak Quantitation: AREA  
Calculation Method: AREA%

| No. | RT    | Area     | Area %  | BC |
|-----|-------|----------|---------|----|
| 1   | 7.767 | 10238602 | 49.079  | BB |
| 2   | 8.667 | 10622974 | 50.921  | BB |
|     |       | 20861576 | 100.000 |    |

## The HPLC of chiral 5n

Chrom Type: Fixed WL Chromatogram, 210 nm

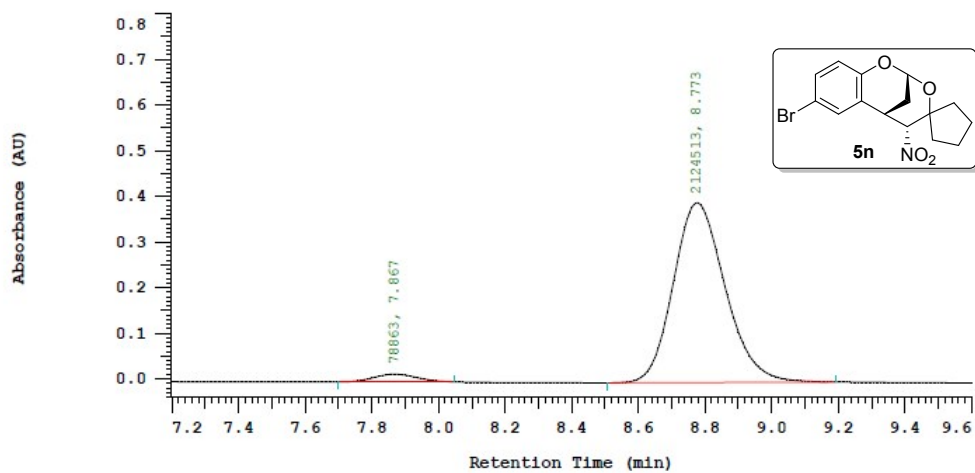

Chrom Type: Fixed WL Chromatogram, 210 nm

Peak Quantitation: AREA  
Calculation Method: AREA%

| No. | RT    | Area    | Area %  | BC |
|-----|-------|---------|---------|----|
| 1   | 7.867 | 78863   | 3.579   | BB |
| 2   | 8.773 | 2124513 | 96.421  | BB |
|     |       | 2203376 | 100.000 |    |

### The $^1\text{H}$ NMR spectrum of **5o** (500 MHz, $\text{CDCl}_3$ )

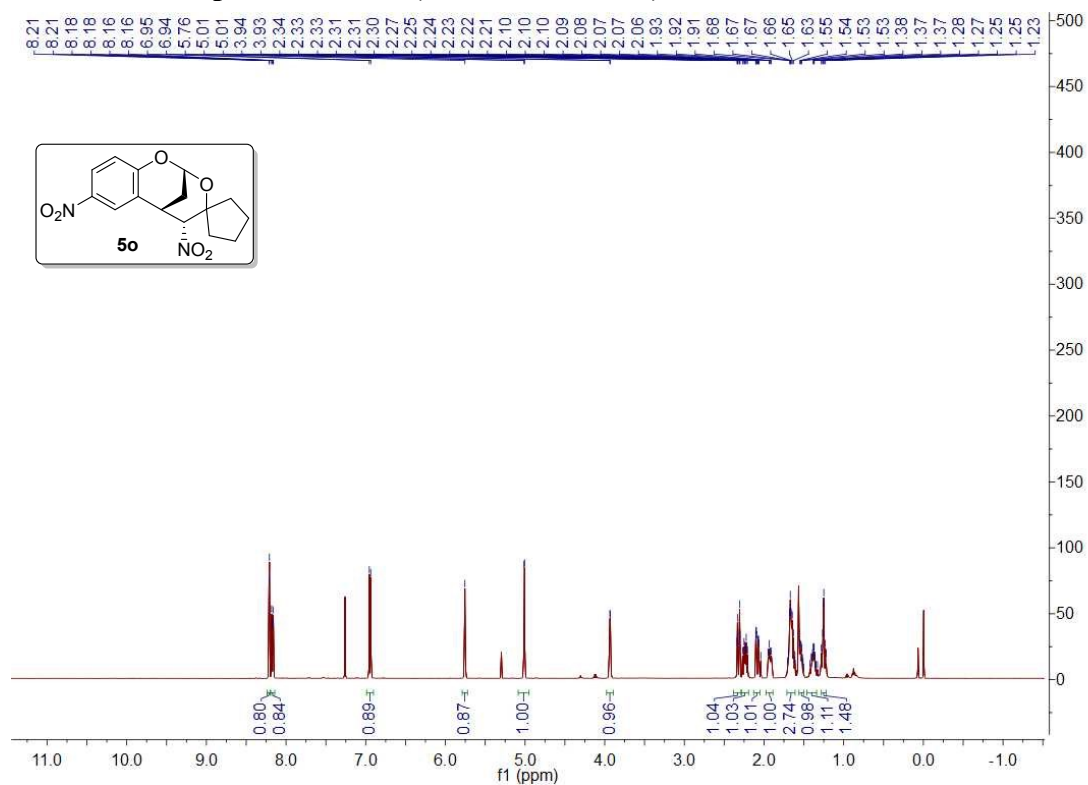

### The $^{13}\text{C}$ NMR spectrum of **5o** (125 MHz, $\text{CDCl}_3$ )

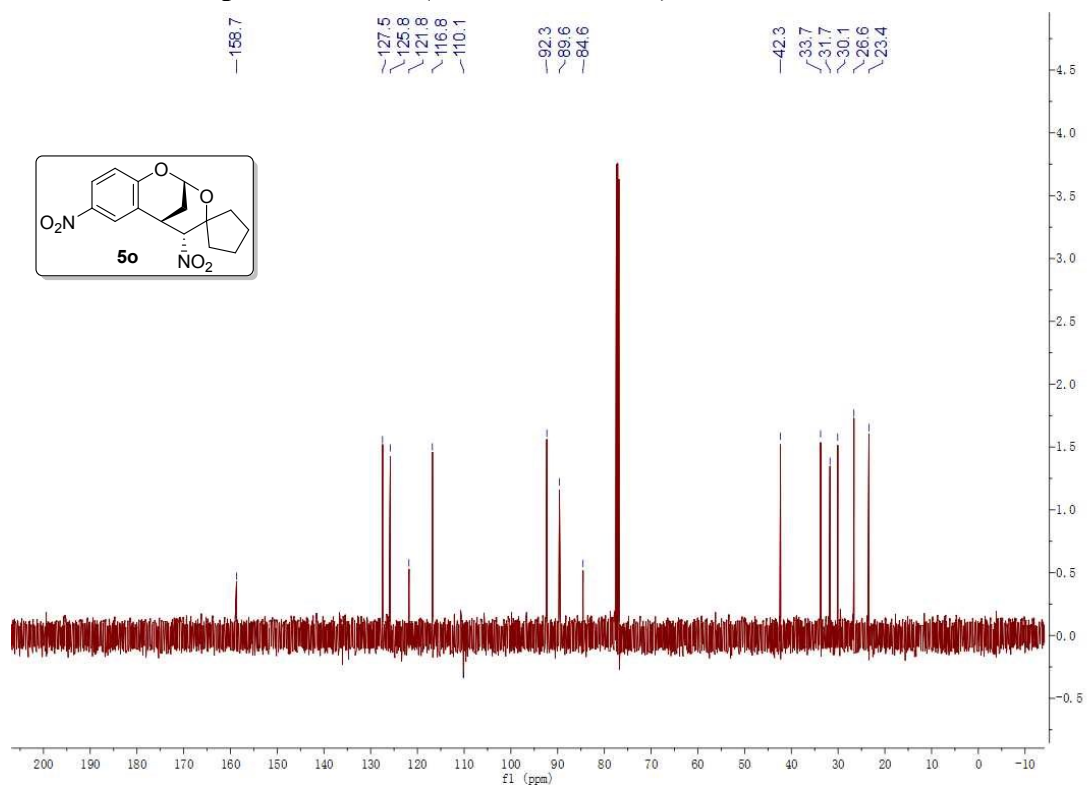

## The HPLC of racemic 5o

Chrom Type: Fixed WL Chromatogram, 210 nm

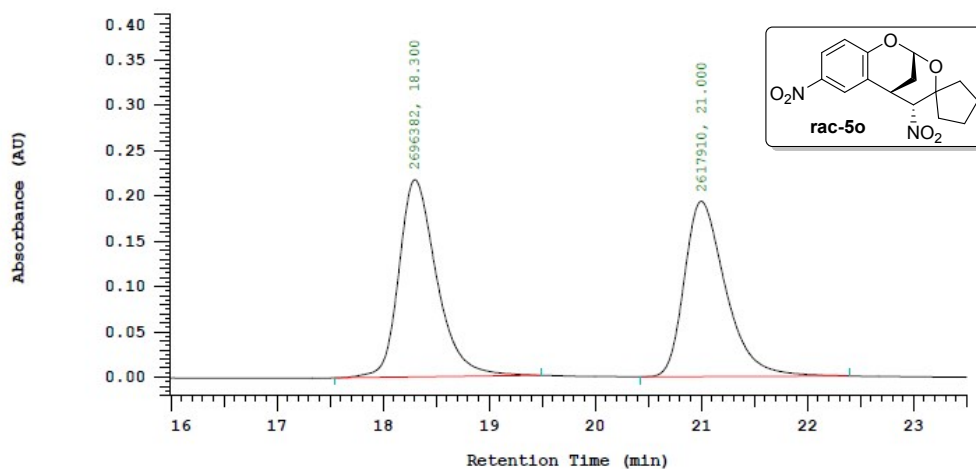

Chrom Type: Fixed WL Chromatogram, 210 nm

Peak Quantitation: AREA  
Calculation Method: AREA%

| No. | RT     | Area    | Area %  | BC |
|-----|--------|---------|---------|----|
| 1   | 18.300 | 2696382 | 50.738  | BB |
| 2   | 21.000 | 2617910 | 49.262  | BB |
|     |        | 5314292 | 100.000 |    |

## The HPLC of chiral 5o

Chrom Type: Fixed WL Chromatogram, 210 nm

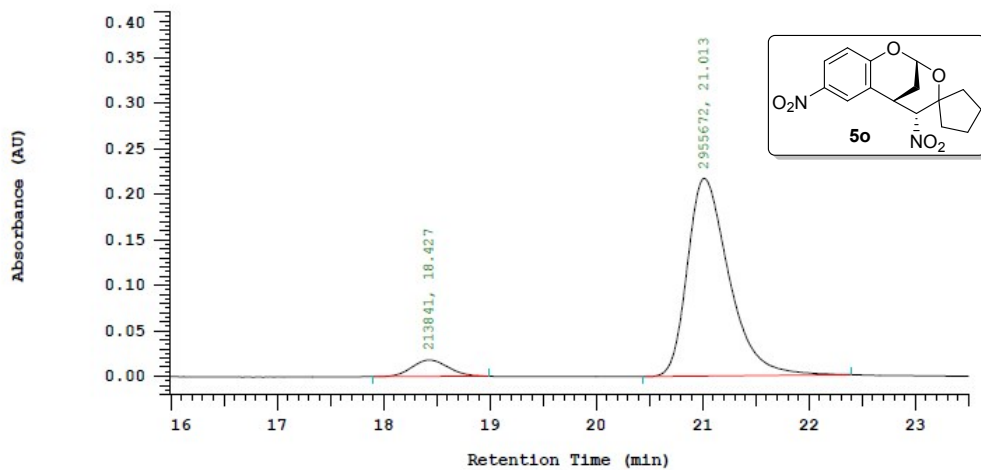

Chrom Type: Fixed WL Chromatogram, 210 nm

Peak Quantitation: AREA  
Calculation Method: AREA%

| No. | RT     | Area    | Area %  | BC |
|-----|--------|---------|---------|----|
| 1   | 18.427 | 213841  | 6.747   | BB |
| 2   | 21.013 | 2955672 | 93.253  | BB |
|     |        | 3169513 | 100.000 |    |

### The $^1\text{H}$ NMR spectrum of 5p (400 MHz, $\text{CDCl}_3$ )

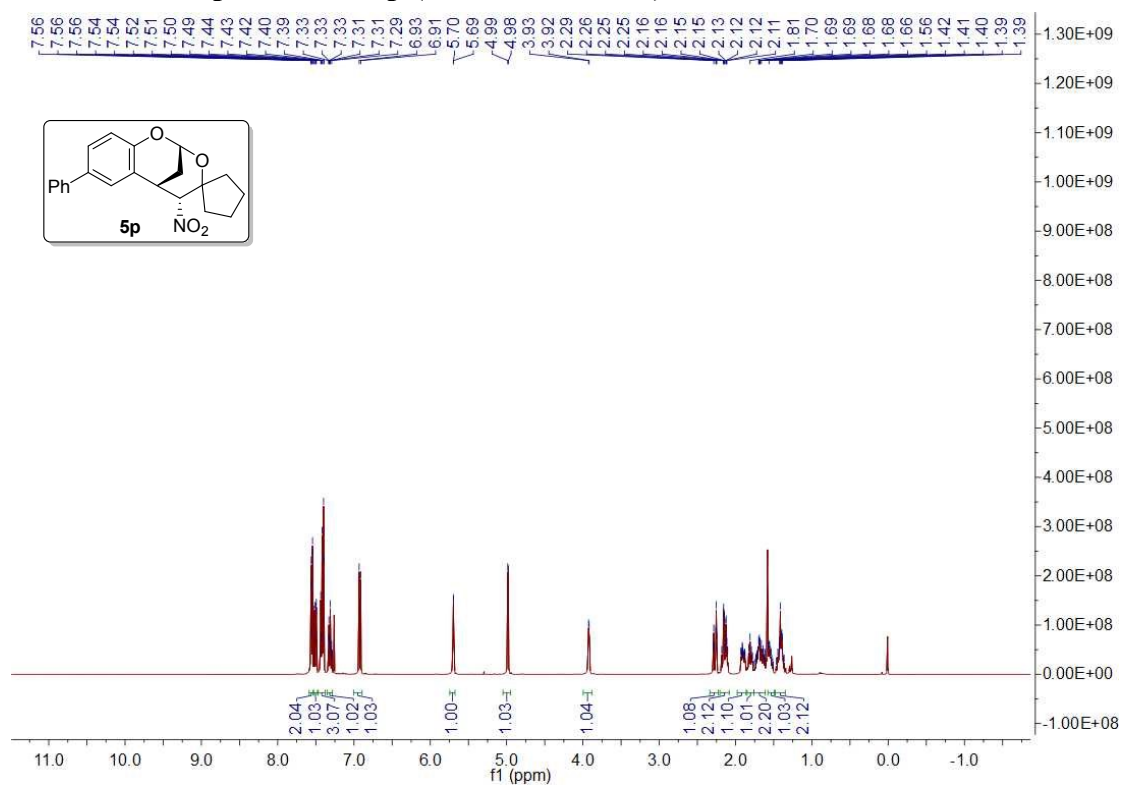

### The $^{13}\text{C}$ NMR spectrum of 5p (101 MHz, $\text{CDCl}_3$ )

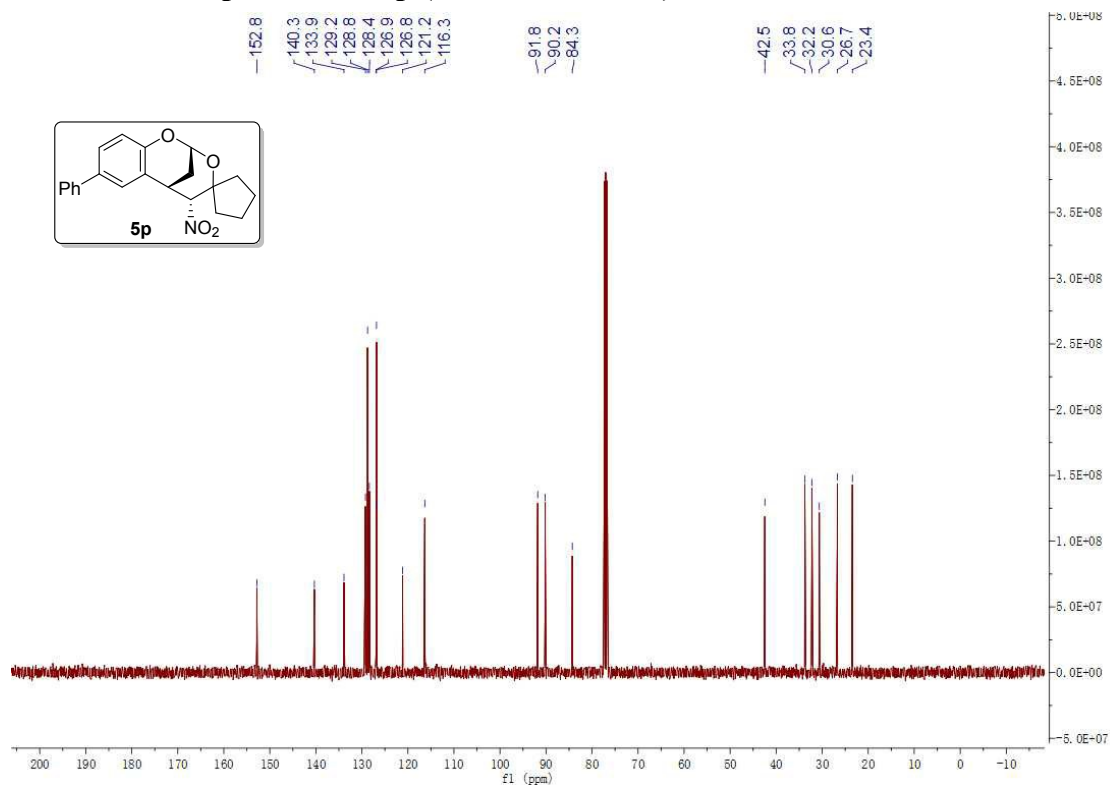

## The HPLC of racemic 5p

Chrom Type: Fixed WL Chromatogram, 204 nm

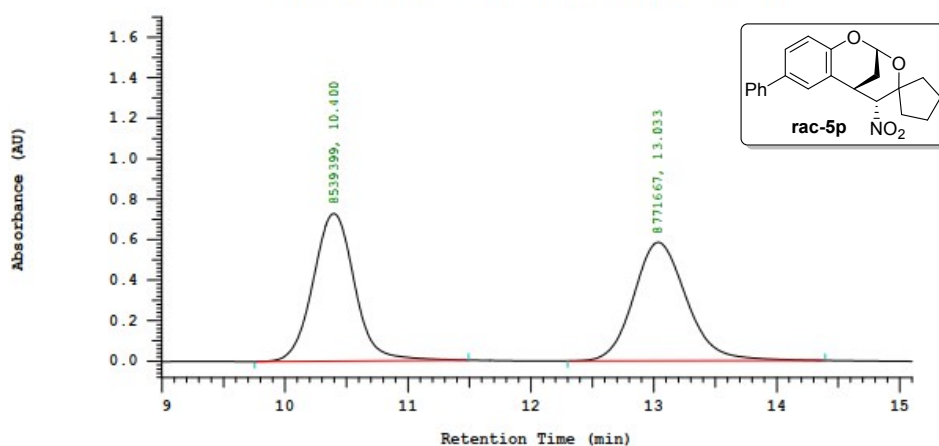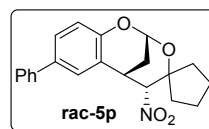

Chrom Type: Fixed WL Chromatogram, 204 nm

Peak Quantitation: AREA  
Calculation Method: AREA%

| No. | RT     | Area     | Area %  | BC |
|-----|--------|----------|---------|----|
| 1   | 10.400 | 8539399  | 49.329  | BB |
| 2   | 13.033 | 8771667  | 50.671  | BB |
|     |        | 17311066 | 100.000 |    |

## The HPLC of chiral 5p

Chrom Type: Fixed WL Chromatogram, 204 nm

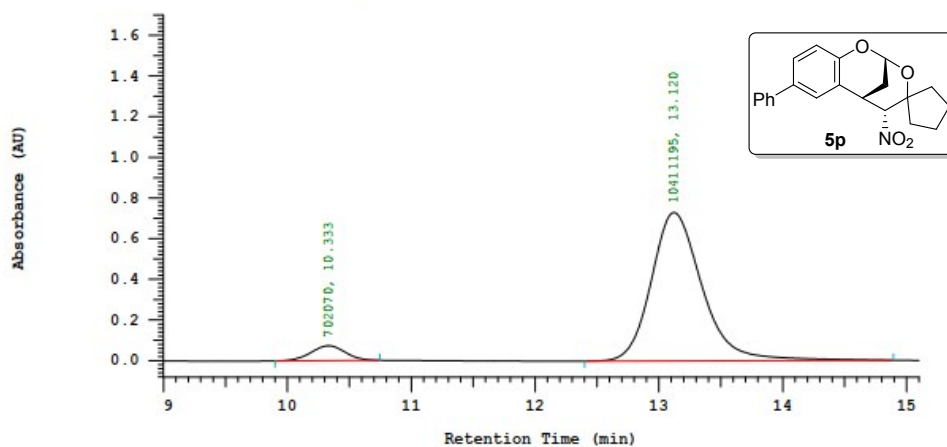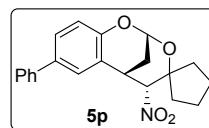

Chrom Type: Fixed WL Chromatogram, 204 nm

Peak Quantitation: AREA  
Calculation Method: AREA%

| No. | RT     | Area     | Area %  | BC |
|-----|--------|----------|---------|----|
| 1   | 10.333 | 702070   | 6.317   | BB |
| 2   | 13.120 | 10411195 | 93.683  | BB |
|     |        | 11113265 | 100.000 |    |

### The $^1\text{H}$ NMR spectrum of 5q (500 MHz, $\text{CDCl}_3$ )

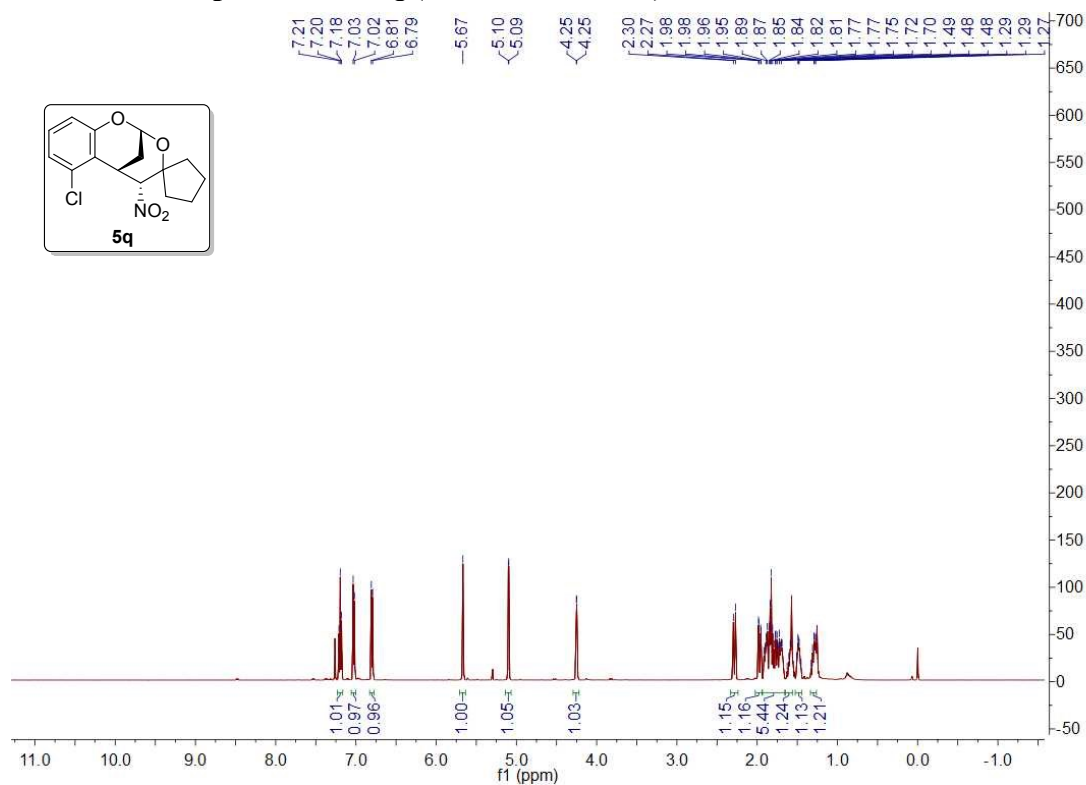

### The $^{13}\text{C}$ NMR spectrum of 5q (125 MHz, $\text{CDCl}_3$ )

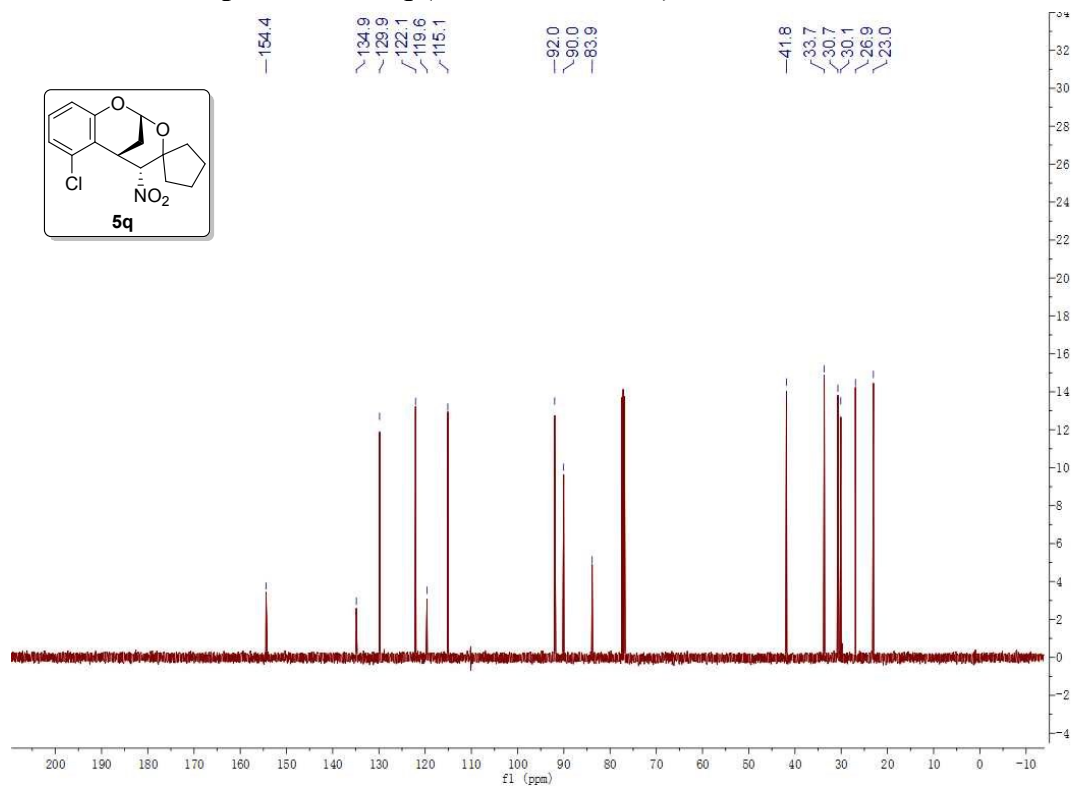



## The HPLC of racemic 5q

Chrom Type: Fixed WL Chromatogram, 210 nm

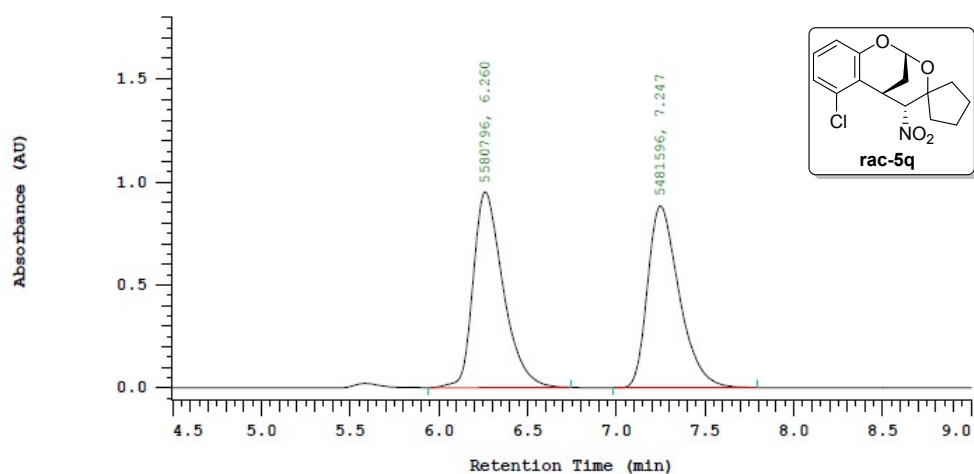

Chrom Type: Fixed WL Chromatogram, 210 nm

Peak Quantitation: AREA  
Calculation Method: AREA%

| No. | RT    | Area     | Area %  | BC |
|-----|-------|----------|---------|----|
| 1   | 6.260 | 5580796  | 50.448  | BB |
| 2   | 7.247 | 5481596  | 49.552  | BB |
|     |       | 11062392 | 100.000 |    |

## The HPLC of chiral 5q

Chrom Type: Fixed WL Chromatogram, 210 nm

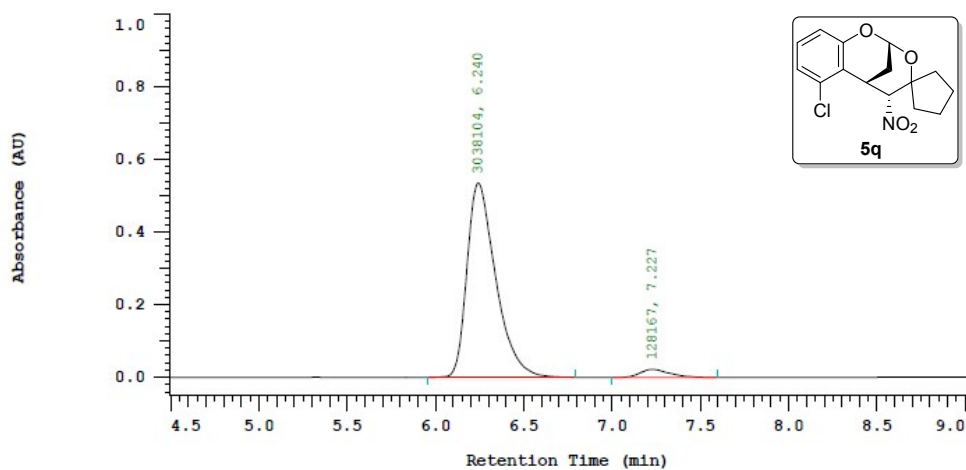

Chrom Type: Fixed WL Chromatogram, 210 nm

Peak Quantitation: AREA  
Calculation Method: AREA%

| No. | RT    | Area    | Area %  | BC |
|-----|-------|---------|---------|----|
| 1   | 6.240 | 3038104 | 95.952  | BB |
| 2   | 7.227 | 128167  | 4.048   | BB |
|     |       | 3166271 | 100.000 |    |

### The $^1\text{H}$ NMR spectrum of 5r (500 MHz, $\text{CDCl}_3$ )

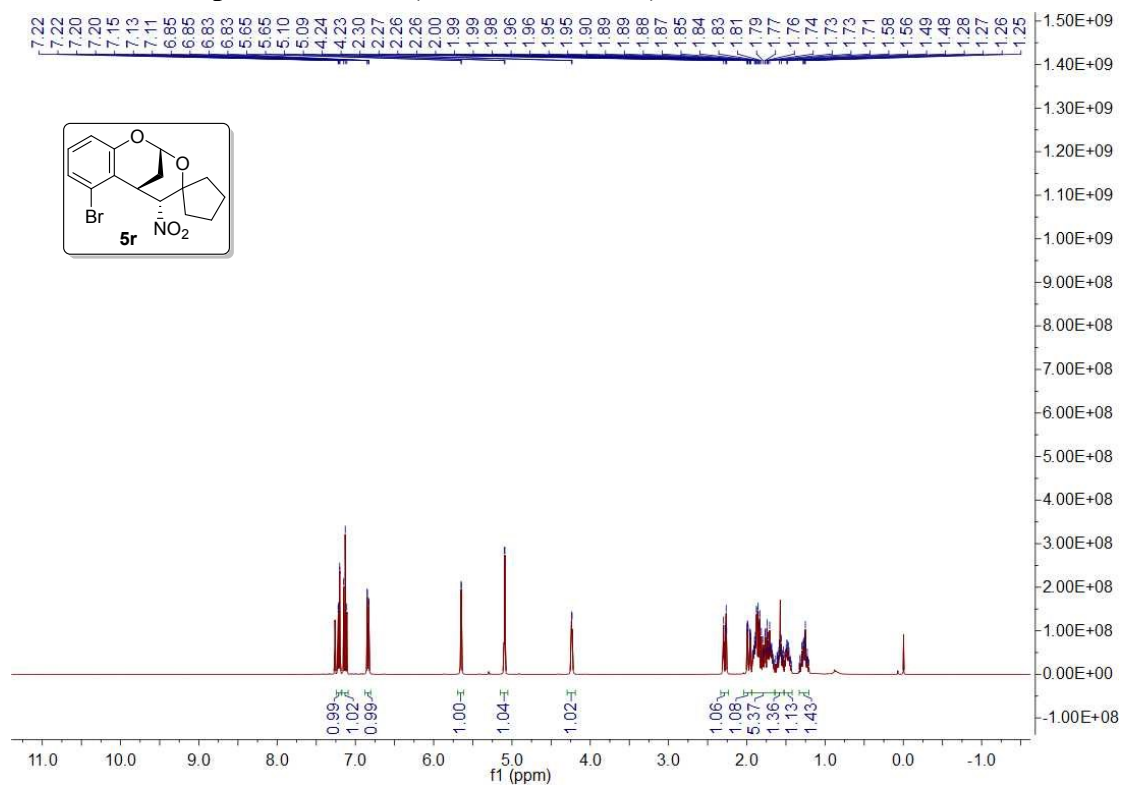

### The $^{13}\text{C}$ NMR spectrum of 5r (125 MHz, $\text{CDCl}_3$ )

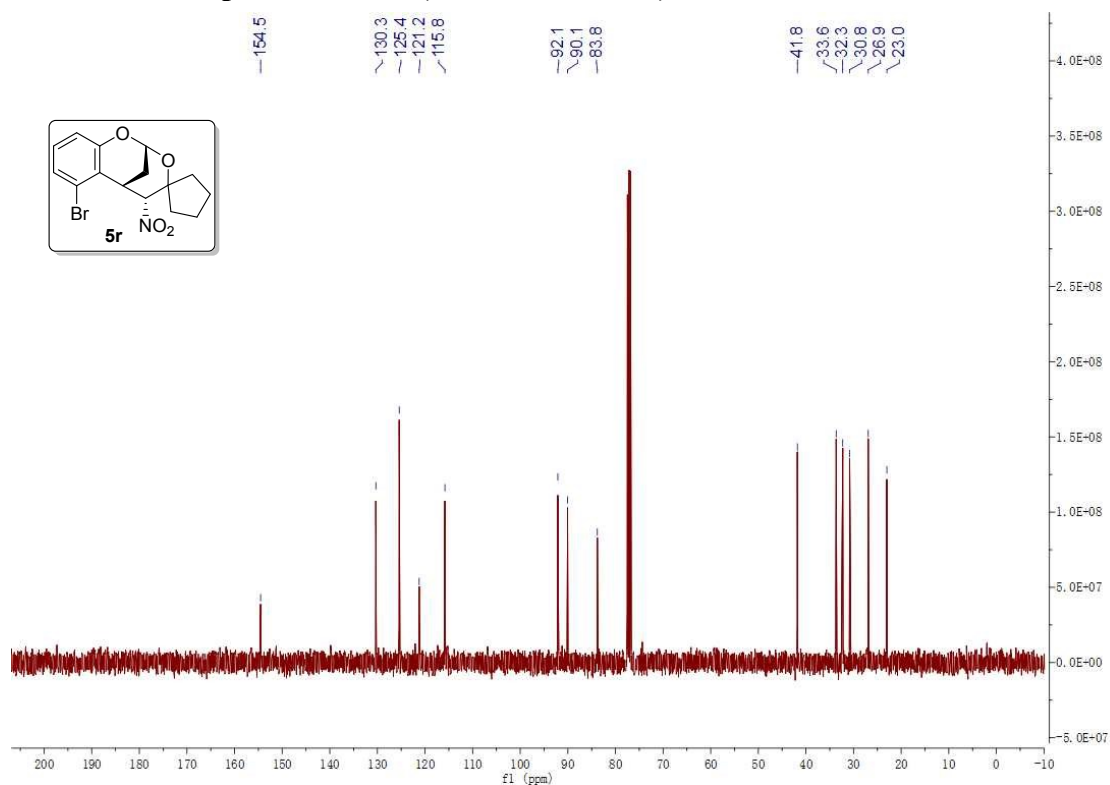

## The HPLC of racemic 5r

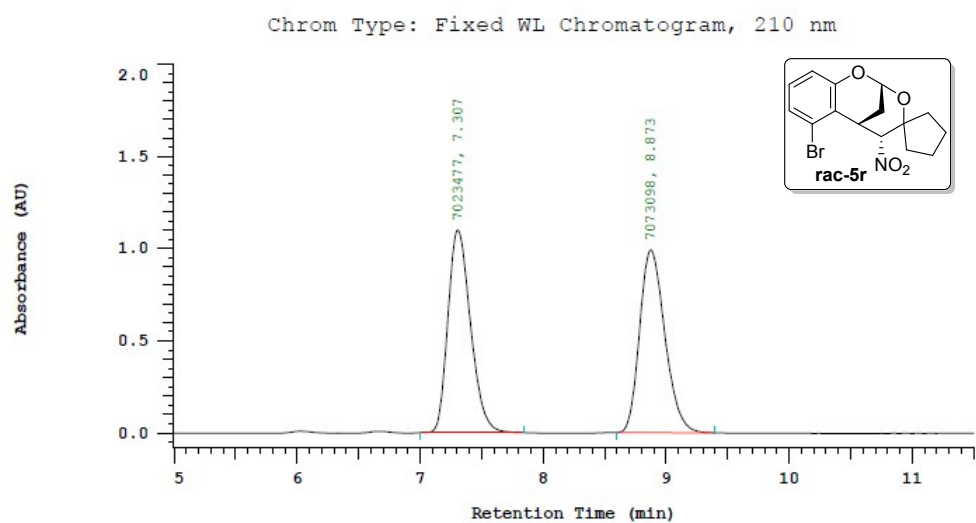

Chrom Type: Fixed WL Chromatogram, 210 nm  
 Peak Quantitation: AREA  
 Calculation Method: AREA%

| No. | RT    | Area     | Area %  | BC |
|-----|-------|----------|---------|----|
| 1   | 7.307 | 7023477  | 49.824  | BB |
| 2   | 8.873 | 7073098  | 50.176  | BB |
|     |       | 14096575 | 100.000 |    |

## The HPLC of chiral 5r

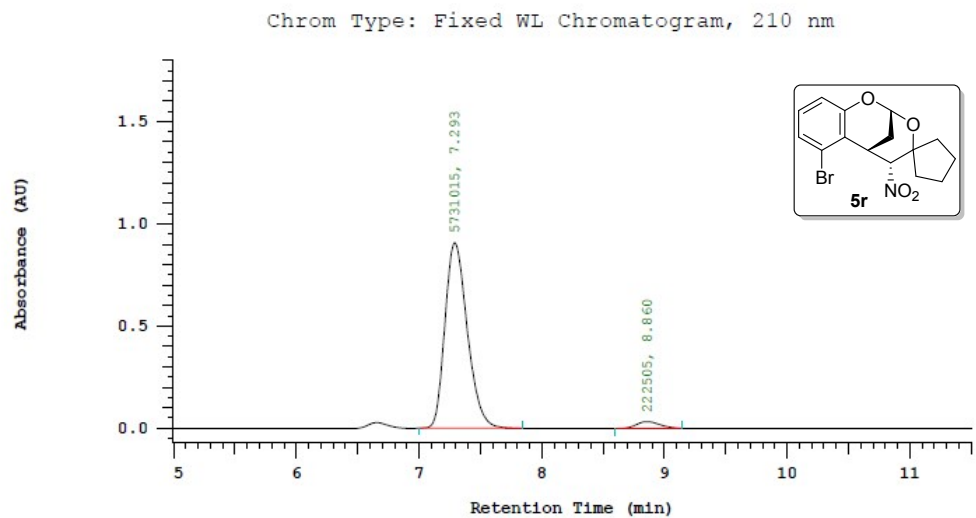

Chrom Type: Fixed WL Chromatogram, 210 nm  
 Peak Quantitation: AREA  
 Calculation Method: AREA%

| No. | RT    | Area    | Area %  | BC |
|-----|-------|---------|---------|----|
| 1   | 7.293 | 5731015 | 96.263  | BB |
| 2   | 8.860 | 222505  | 3.737   | BB |
|     |       | 5953520 | 100.000 |    |

## The HPLC of chiral 5r after recrystallization

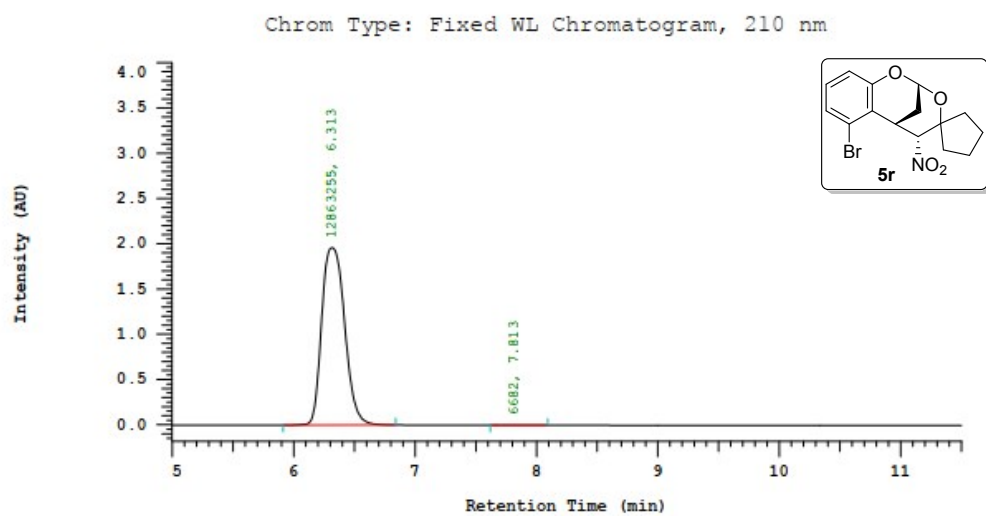

Chrom Type: Fixed WL Chromatogram, 210 nm  
Peak Quantitation: AREA  
Calculation Method: AREA%

| No. | RT    | Area     | Area %  | BC |
|-----|-------|----------|---------|----|
| 1   | 6.313 | 12863255 | 99.948  | BB |
| 2   | 7.813 | 6682     | 0.052   | BB |
|     |       | 12869937 | 100.000 |    |

### The $^1\text{H}$ NMR spectrum of 5s (500 MHz, $\text{CDCl}_3$ )

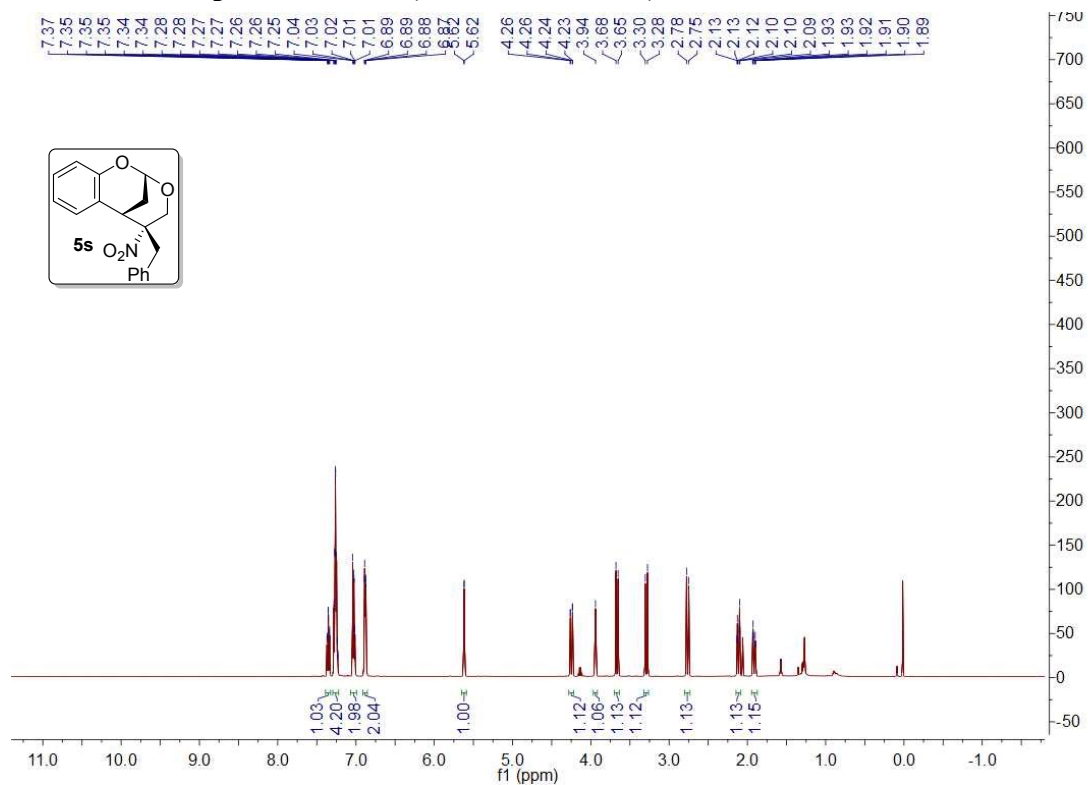

### The $^{13}\text{C}$ NMR spectrum of 5s (101 MHz, $\text{CDCl}_3$ )

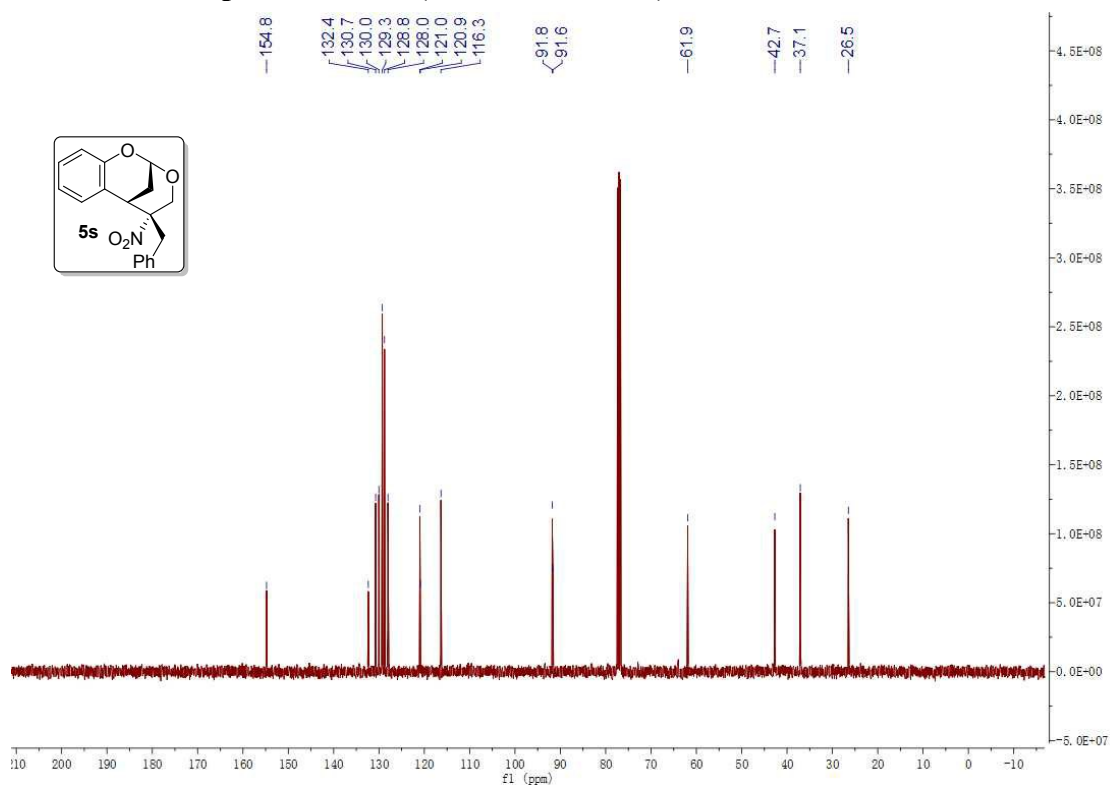

The NOSEY spectrum of 5s (500 MHz, CDCl<sub>3</sub>)

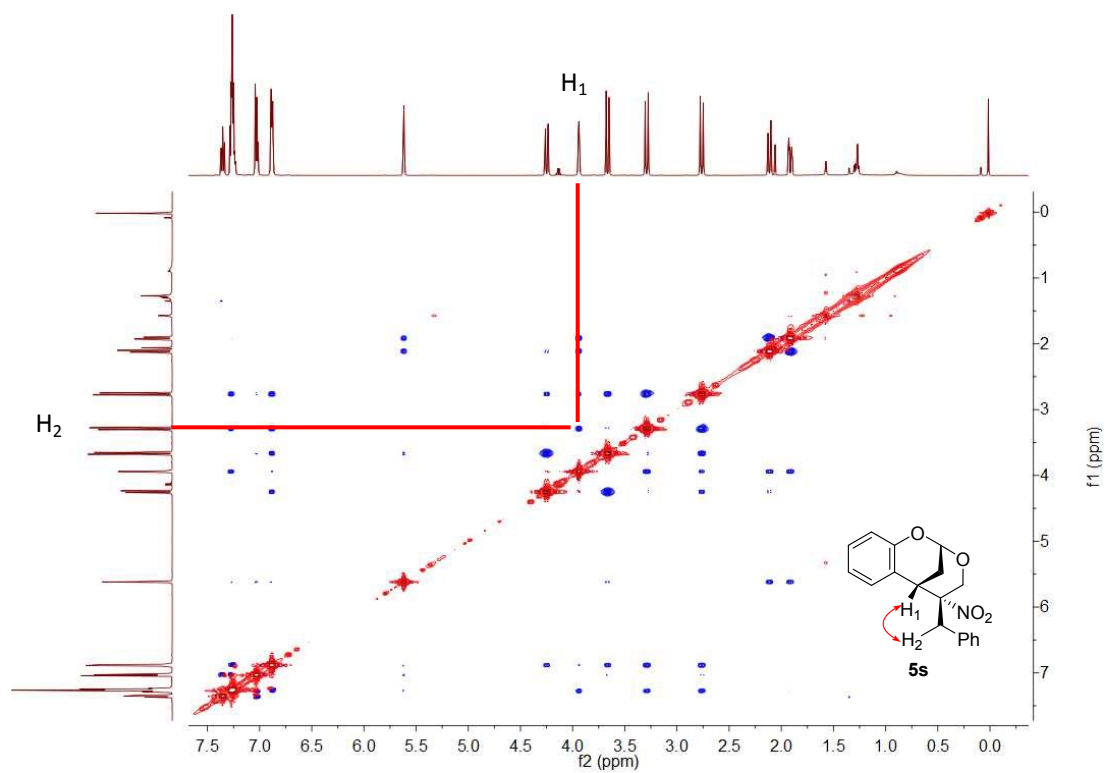

## The HPLC of racemic 5s

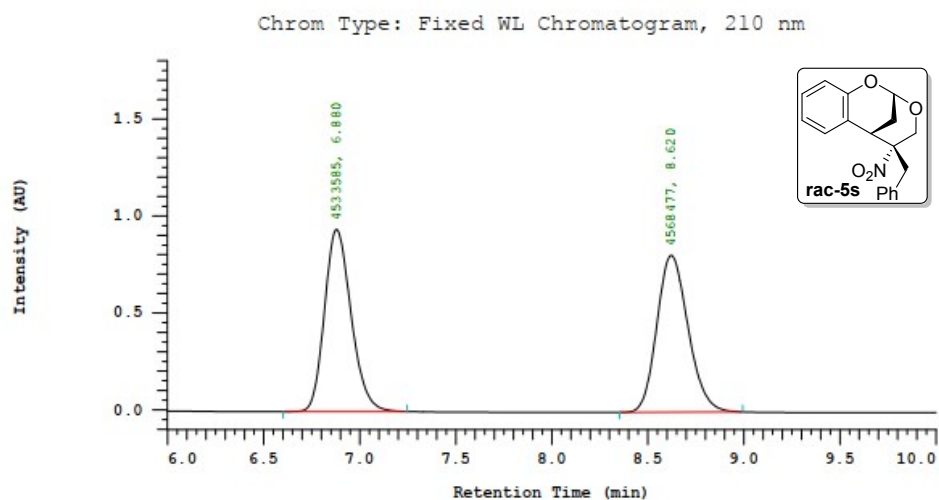

Chrom Type: Fixed WL Chromatogram, 210 nm

Peak Quantitation: AREA

Calculation Method: AREA%

| No. | RT    | Area    | Area %  | BC |
|-----|-------|---------|---------|----|
| 1   | 6.880 | 4533585 | 49.808  | BB |
| 2   | 8.620 | 4568477 | 50.192  | BB |
|     |       | 9102062 | 100.000 |    |

## The HPLC of chiral 5s

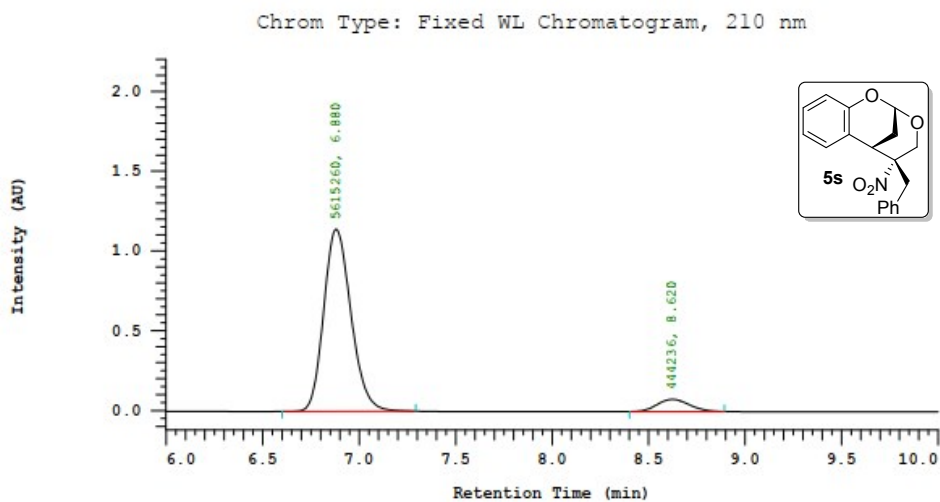

Chrom Type: Fixed WL Chromatogram, 210 nm

Peak Quantitation: AREA

Calculation Method: AREA%

| No. | RT    | Area    | Area %  | BC |
|-----|-------|---------|---------|----|
| 1   | 6.880 | 5615260 | 92.669  | BB |
| 2   | 8.620 | 444236  | 7.331   | BB |
|     |       | 6059496 | 100.000 |    |

### The $^1\text{H}$ NMR spectrum of 5s' (400 MHz, $\text{CDCl}_3$ )

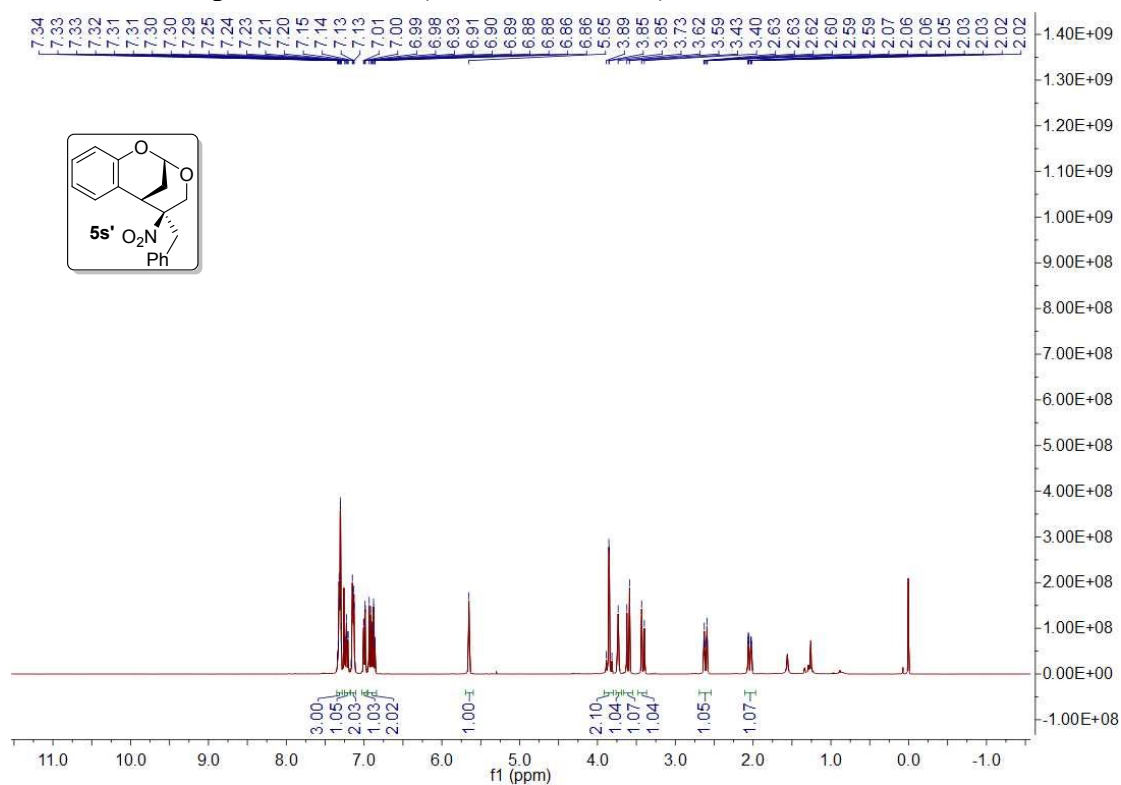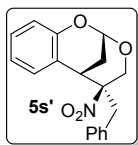

### The $^{13}\text{C}$ NMR spectrum of 5s' (101 MHz, $\text{CDCl}_3$ )

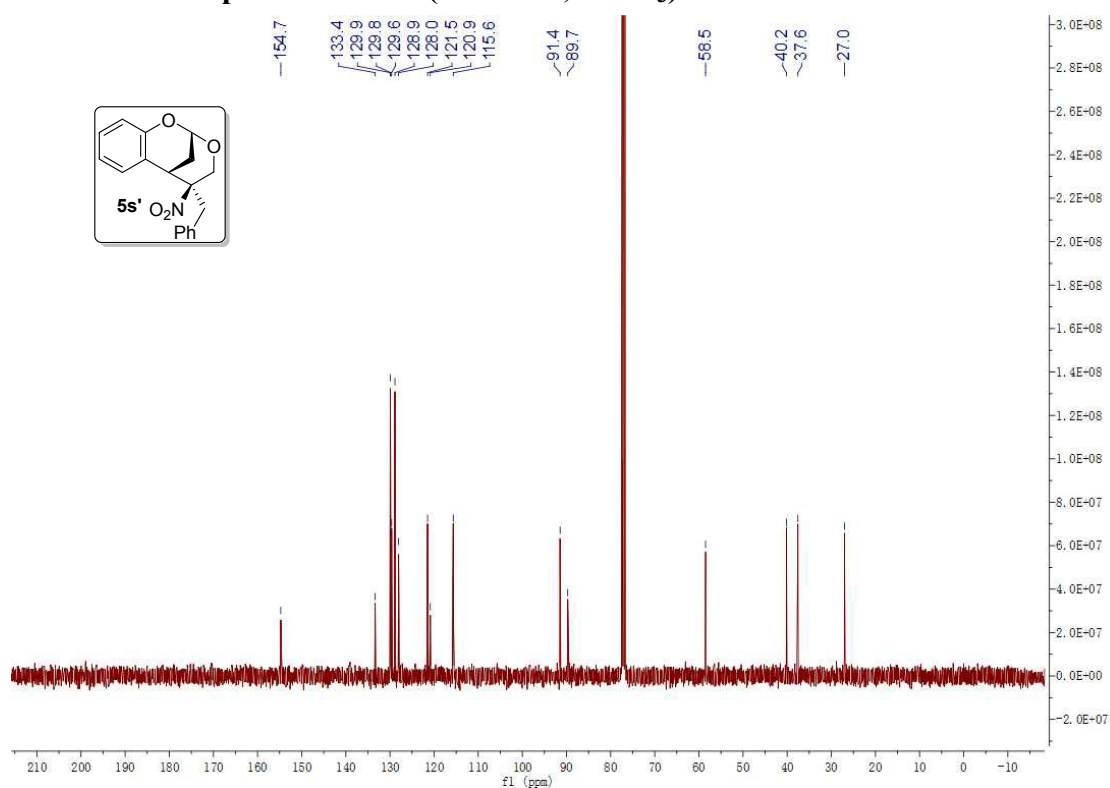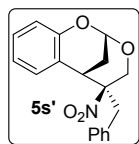



## The HPLC of racemic 5s'

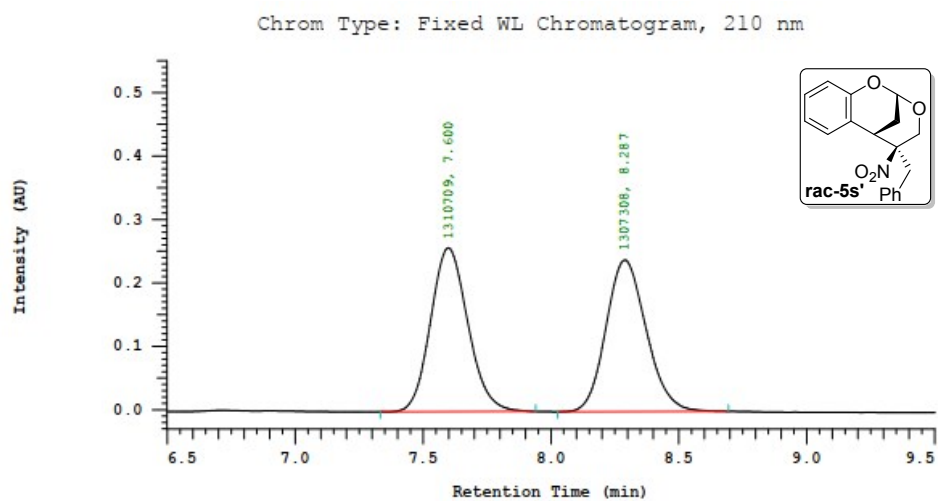

Chrom Type: Fixed WL Chromatogram, 210 nm  
 Peak Quantitation: AREA  
 Calculation Method: AREA%

| No. | RT    | Area    | Area %  | BC |
|-----|-------|---------|---------|----|
| 1   | 7.600 | 1310709 | 50.065  | BB |
| 2   | 8.287 | 1307308 | 49.935  | BB |
|     |       | 2618017 | 100.000 |    |

## The HPLC of chiral 5s'

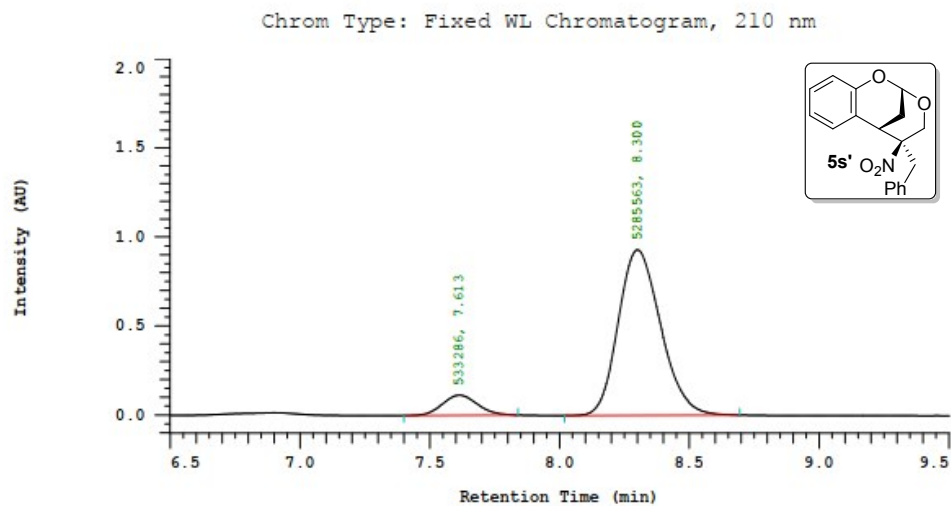

Chrom Type: Fixed WL Chromatogram, 210 nm  
 Peak Quantitation: AREA  
 Calculation Method: AREA%

| No. | RT    | Area    | Area %  | BC |
|-----|-------|---------|---------|----|
| 1   | 7.613 | 533286  | 9.165   | BB |
| 2   | 8.300 | 5285563 | 90.835  | BB |
|     |       | 5818849 | 100.000 |    |

The  $^1\text{H}$  NMR spectrum of 5t (500 MHz,  $\text{CDCl}_3$ )

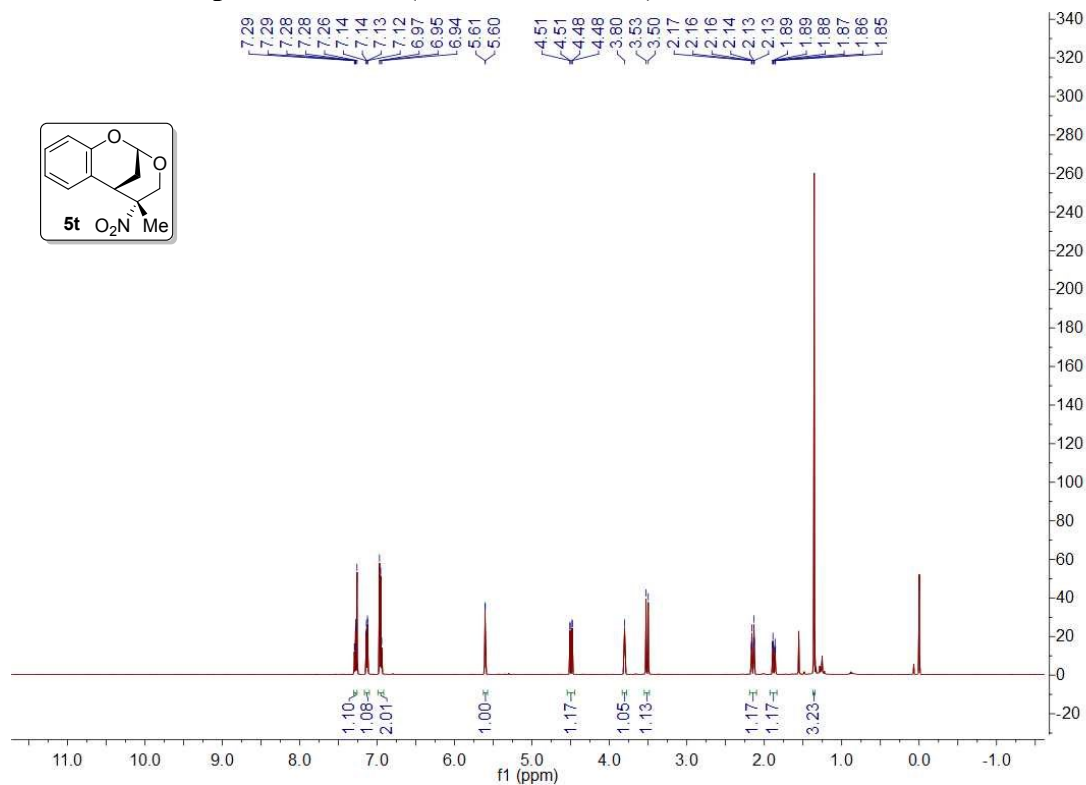

The  $^{13}\text{C}$  NMR spectrum of 5t (101 MHz,  $\text{CDCl}_3$ )

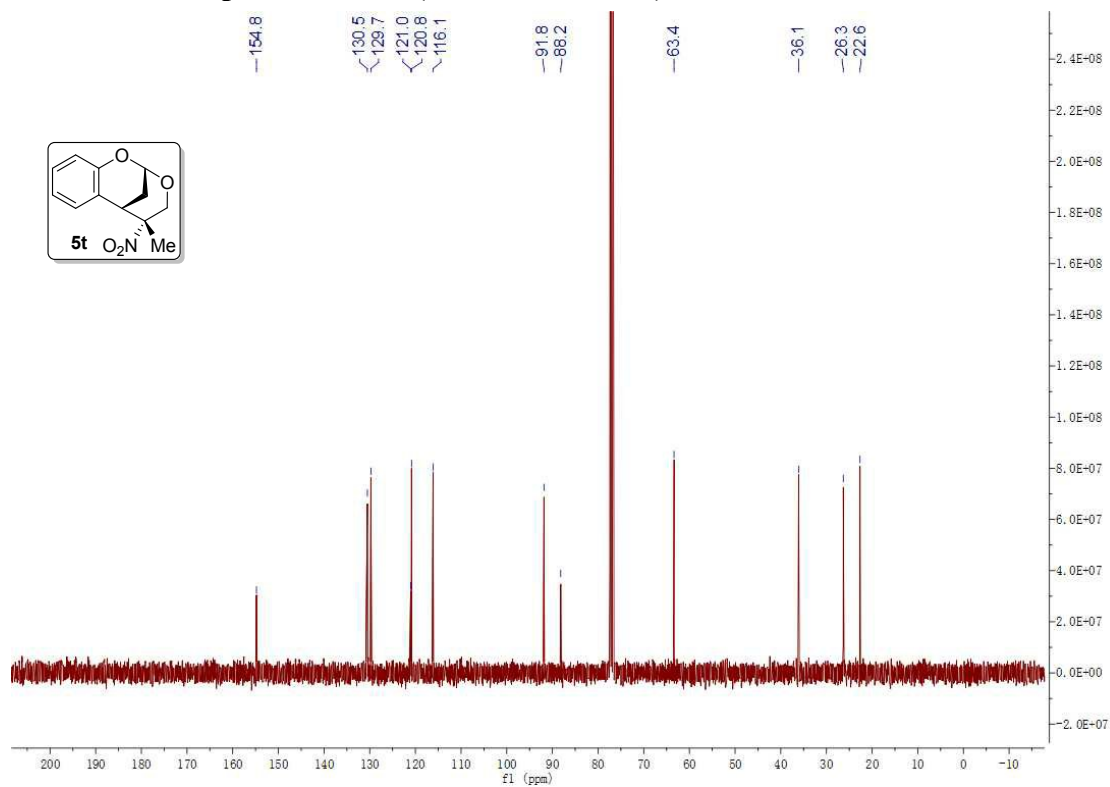

The NOSEY spectrum of 5t (500 MHz, CDCl<sub>3</sub>)

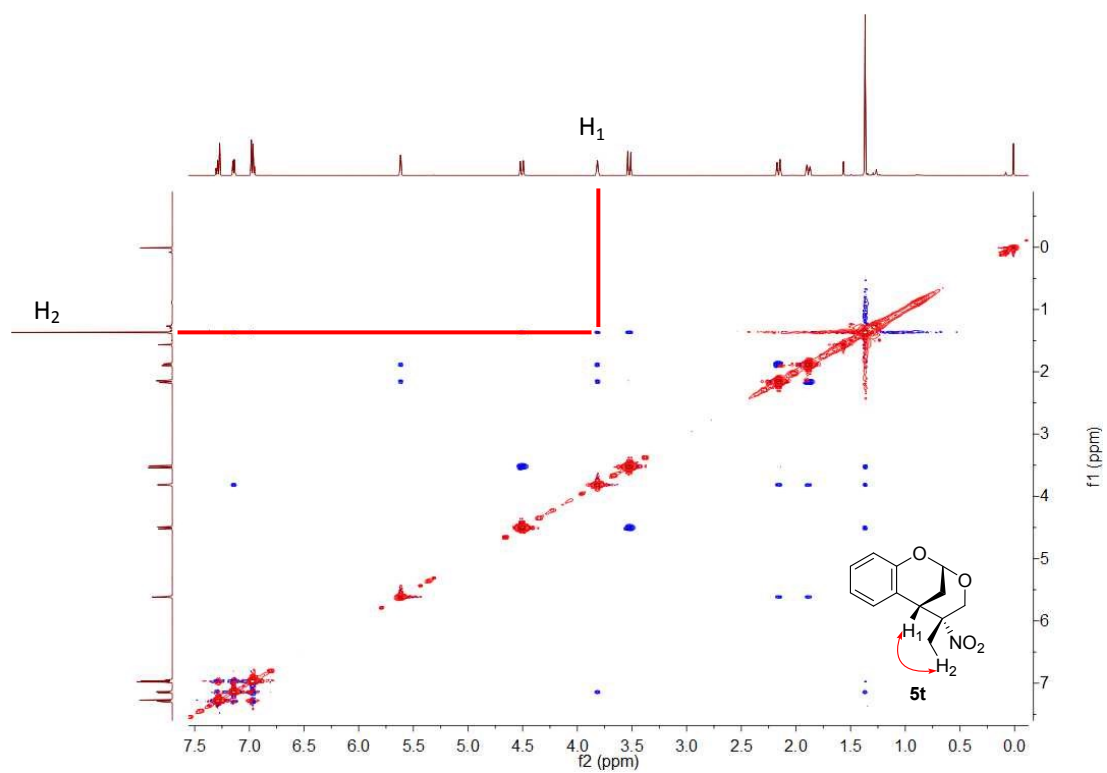

## The HPLC of racemic 5t

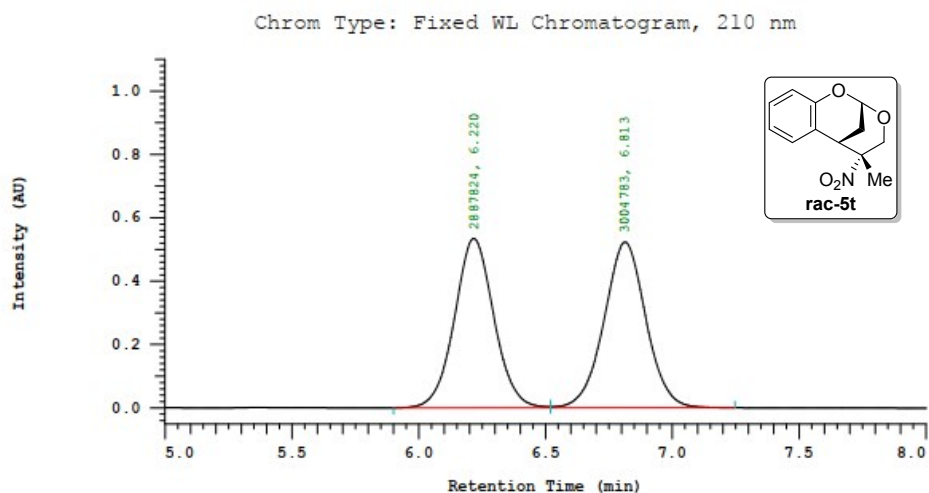

Chrom Type: Fixed WL Chromatogram, 210 nm

Peak Quantitation: AREA

Calculation Method: AREA%

| No. | RT    | Area    | Area %  | BC |
|-----|-------|---------|---------|----|
| 1   | 6.220 | 2887824 | 49.008  | BV |
| 2   | 6.813 | 3004783 | 50.992  | VB |
|     |       | 5892607 | 100.000 |    |

## The HPLC of chiral 5t

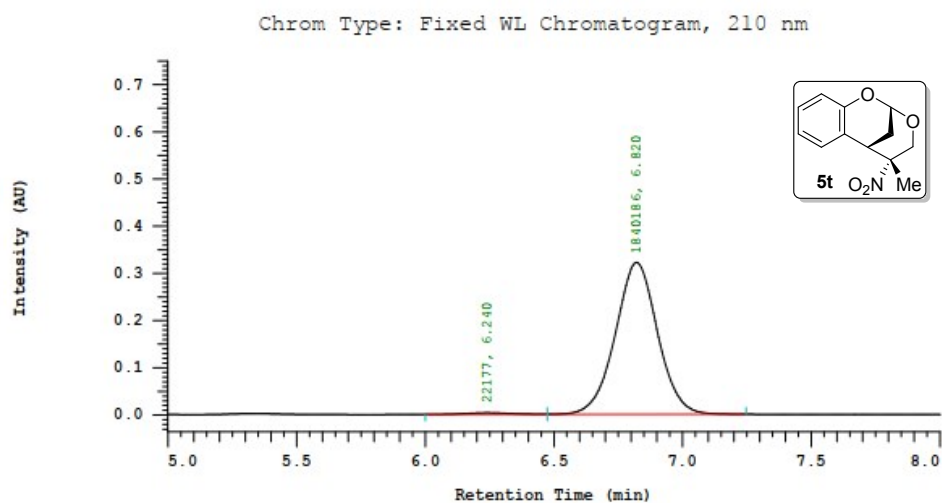

Chrom Type: Fixed WL Chromatogram, 210 nm

Peak Quantitation: AREA

Calculation Method: AREA%

| No. | RT    | Area    | Area %  | BC |
|-----|-------|---------|---------|----|
| 1   | 6.240 | 22177   | 1.191   | BV |
| 2   | 6.820 | 1840186 | 98.809  | VB |
|     |       | 1862363 | 100.000 |    |

### The $^1\text{H}$ NMR spectrum of 5t' (400 MHz, $\text{CDCl}_3$ )

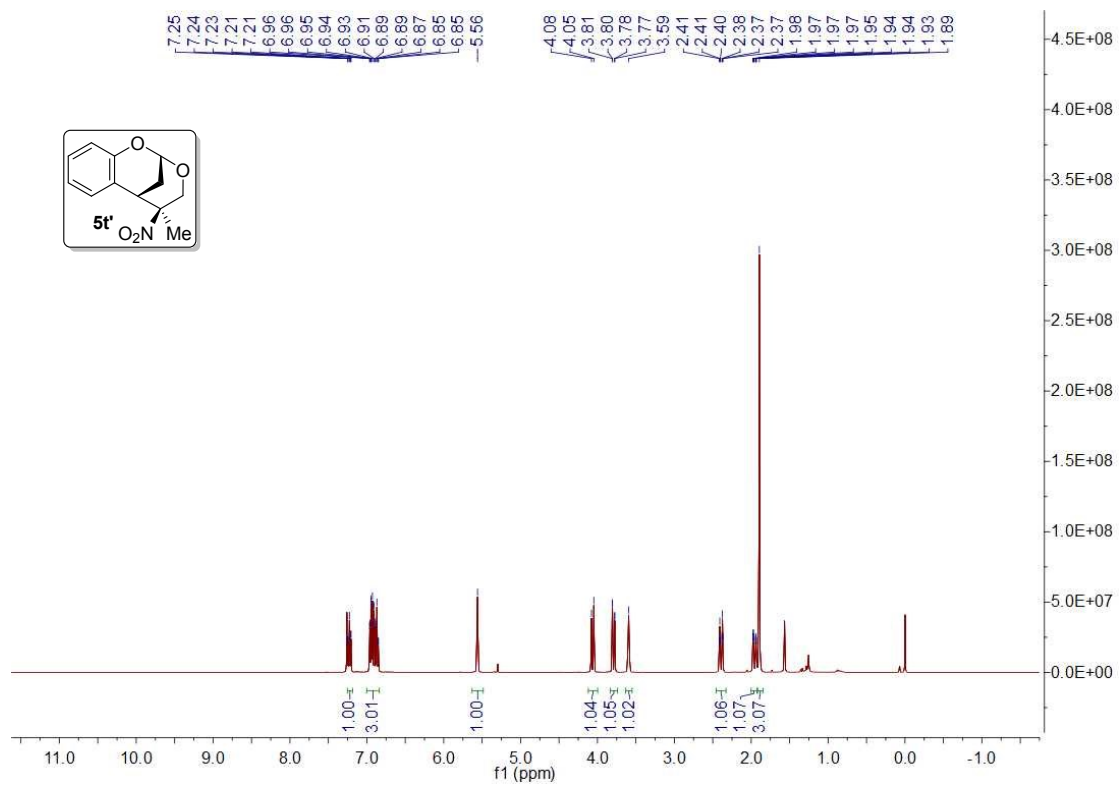

### The $^{13}\text{C}$ NMR spectrum of 5t' (101 MHz, $\text{CDCl}_3$ )

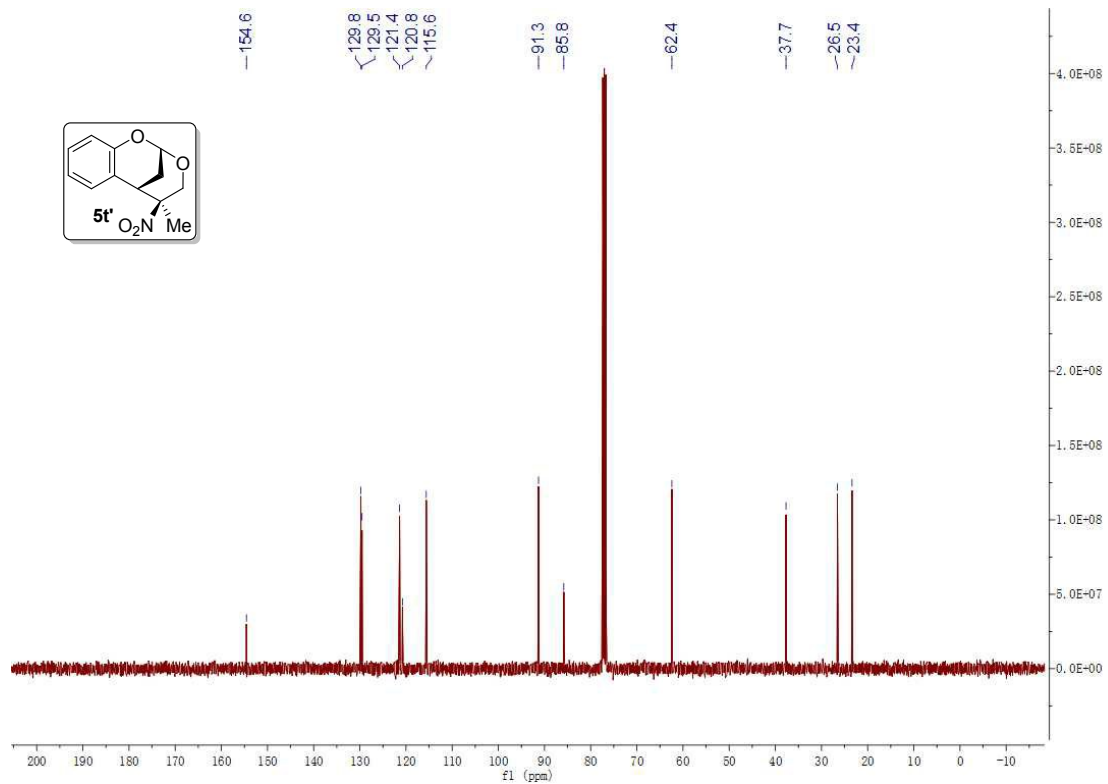

## The HPLC of racemic 5t'

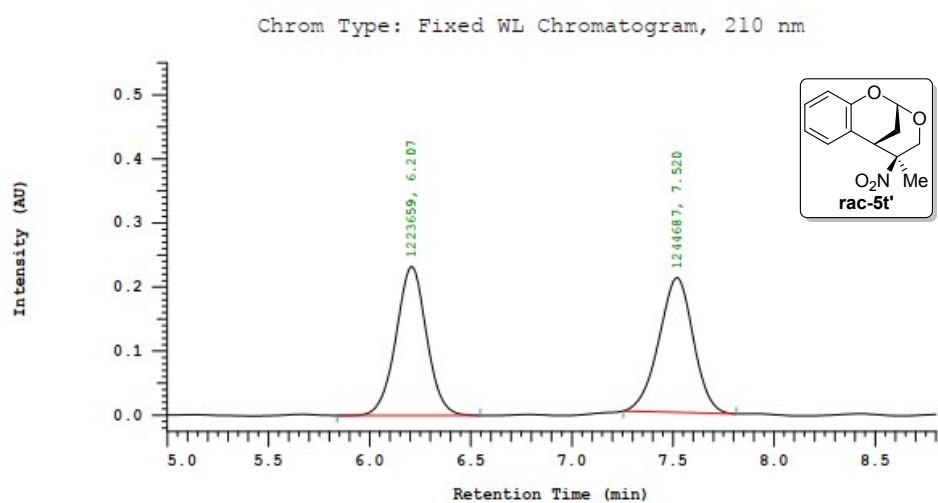

Chrom Type: Fixed WL Chromatogram, 210 nm  
Peak Quantitation: AREA  
Calculation Method: AREA%

| No. | RT    | Area    | Area %  | BC |
|-----|-------|---------|---------|----|
| 1   | 6.207 | 1223659 | 49.574  | BB |
| 2   | 7.520 | 1244687 | 50.426  | BB |
|     |       | 2468346 | 100.000 |    |

## The HPLC of chiral 5t'

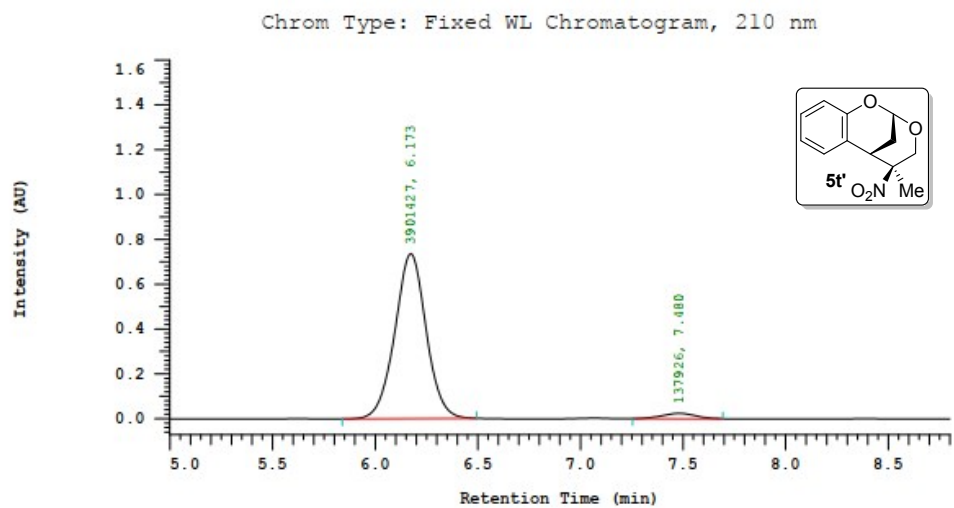

Chrom Type: Fixed WL Chromatogram, 210 nm  
Peak Quantitation: AREA  
Calculation Method: AREA%

| No. | RT    | Area    | Area %  | BC |
|-----|-------|---------|---------|----|
| 1   | 6.173 | 3901427 | 96.585  | BB |
| 2   | 7.480 | 137926  | 3.415   | BB |
|     |       | 4039353 | 100.000 |    |

The  $^1\text{H}$  NMR spectrum of 5u (400 MHz,  $\text{CDCl}_3$ )

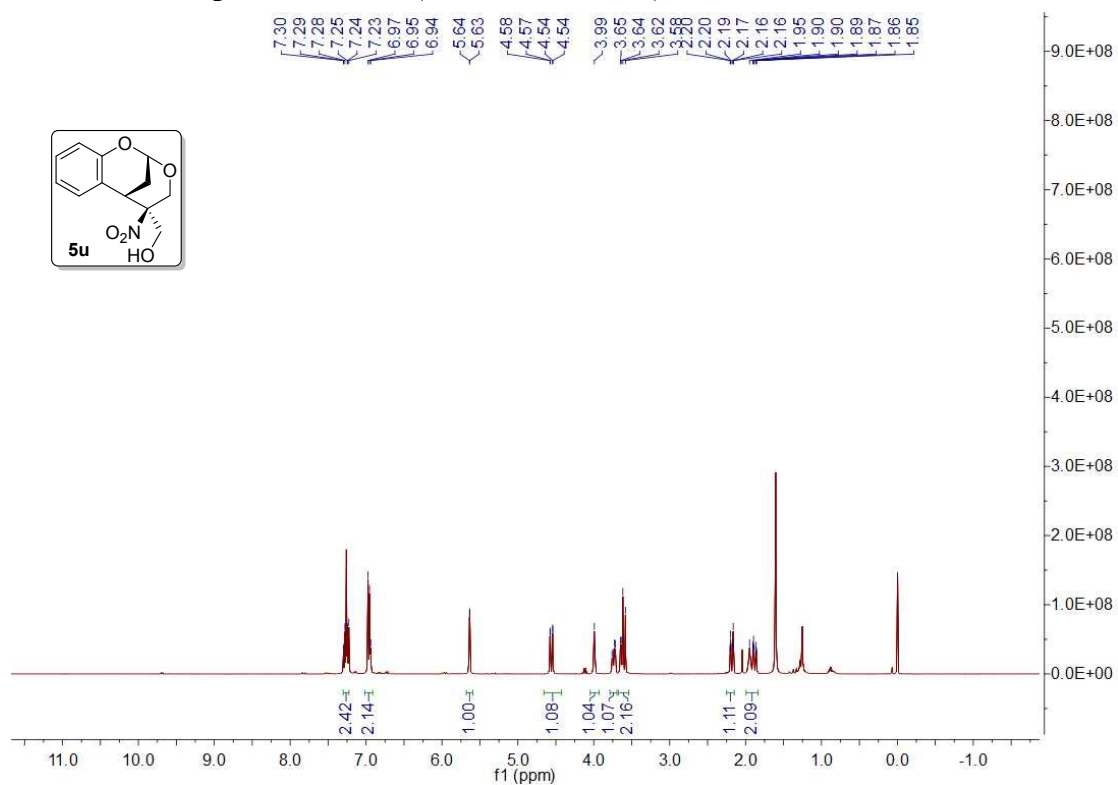

The  $^{13}\text{C}$  NMR spectrum of 5u (101 MHz,  $\text{CDCl}_3$ )

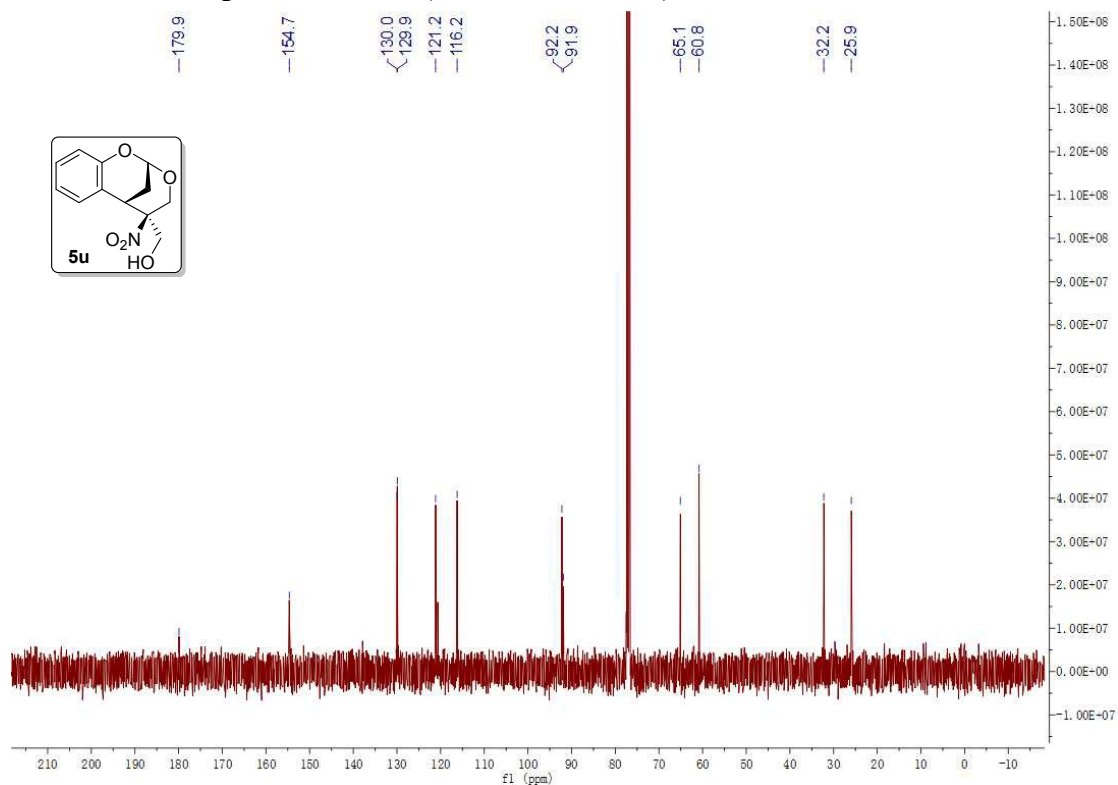

## The HPLC of racemic 5u

Chrom Type: Fixed WL Chromatogram, 204 nm

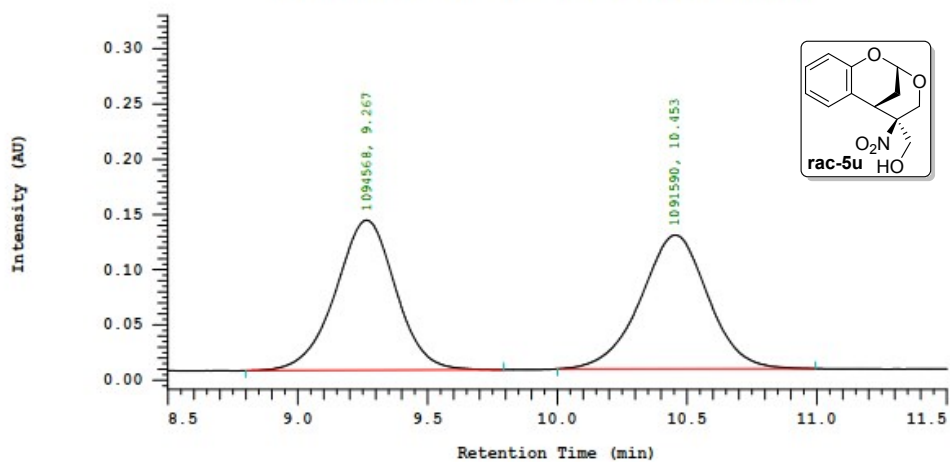

Chrom Type: Fixed WL Chromatogram, 204 nm

Peak Quantitation: AREA  
Calculation Method: AREA%

| No. | RT     | Area    | Area %  | BC |
|-----|--------|---------|---------|----|
| 1   | 9.267  | 1094568 | 50.068  | BB |
| 2   | 10.453 | 1091590 | 49.932  | BB |
|     |        | 2186158 | 100.000 |    |

## The HPLC of chiral 5u

Chrom Type: Fixed WL Chromatogram, 210 nm

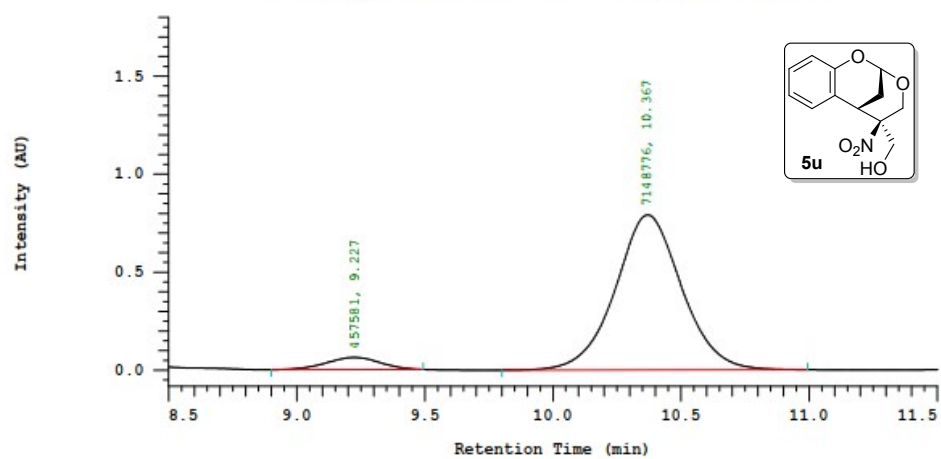

Chrom Type: Fixed WL Chromatogram, 210 nm

Peak Quantitation: AREA  
Calculation Method: AREA%

| No. | RT     | Area   | Area %  | BC |
|-----|--------|--------|---------|----|
| 1   | 9.227  | 45758  | 6.016   | BB |
| 2   | 10.367 | 714876 | 93.984  | BB |
|     |        | 760635 | 100.000 |    |



The  $^1\text{H}$  NMR spectrum of **5u'** (400 MHz,  $\text{CDCl}_3$ )

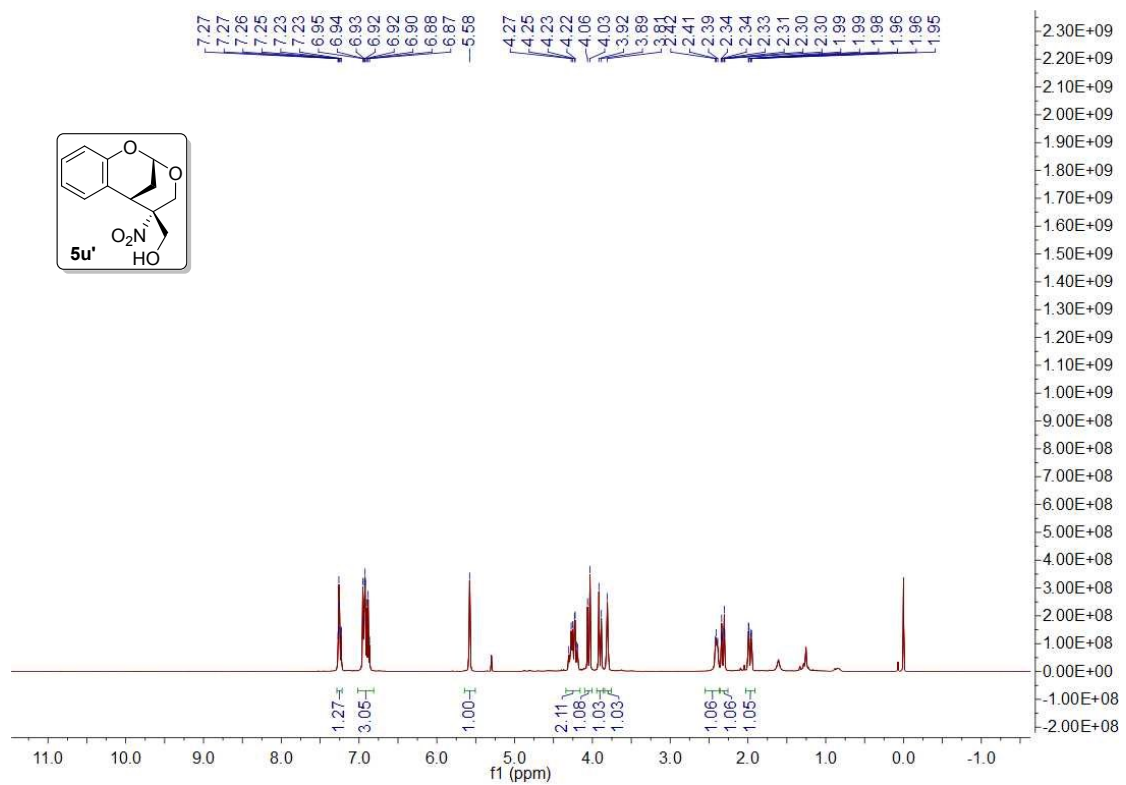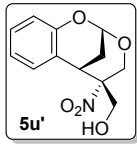

The  $^{13}\text{C}$  NMR spectrum of **5u'** (101 MHz,  $\text{CDCl}_3$ )

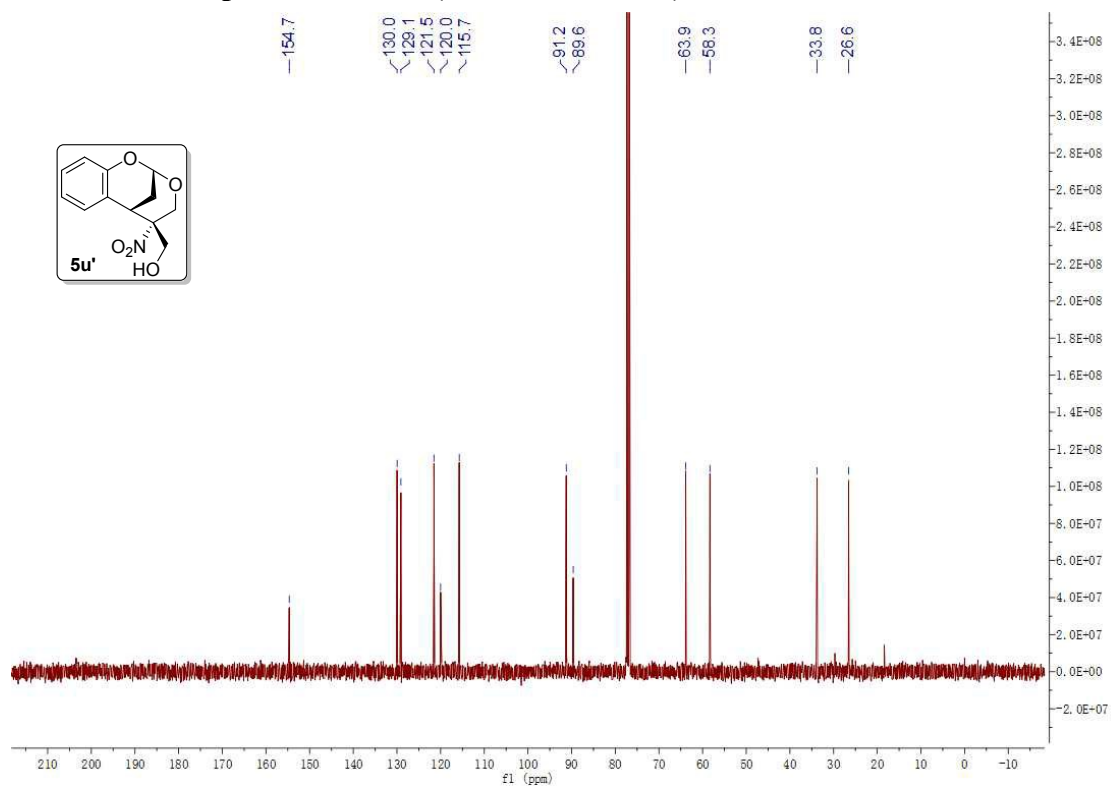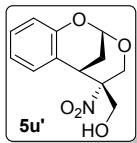

# The NOSEY spectrum of 5u' (400 MHz, CDCl<sub>3</sub>)

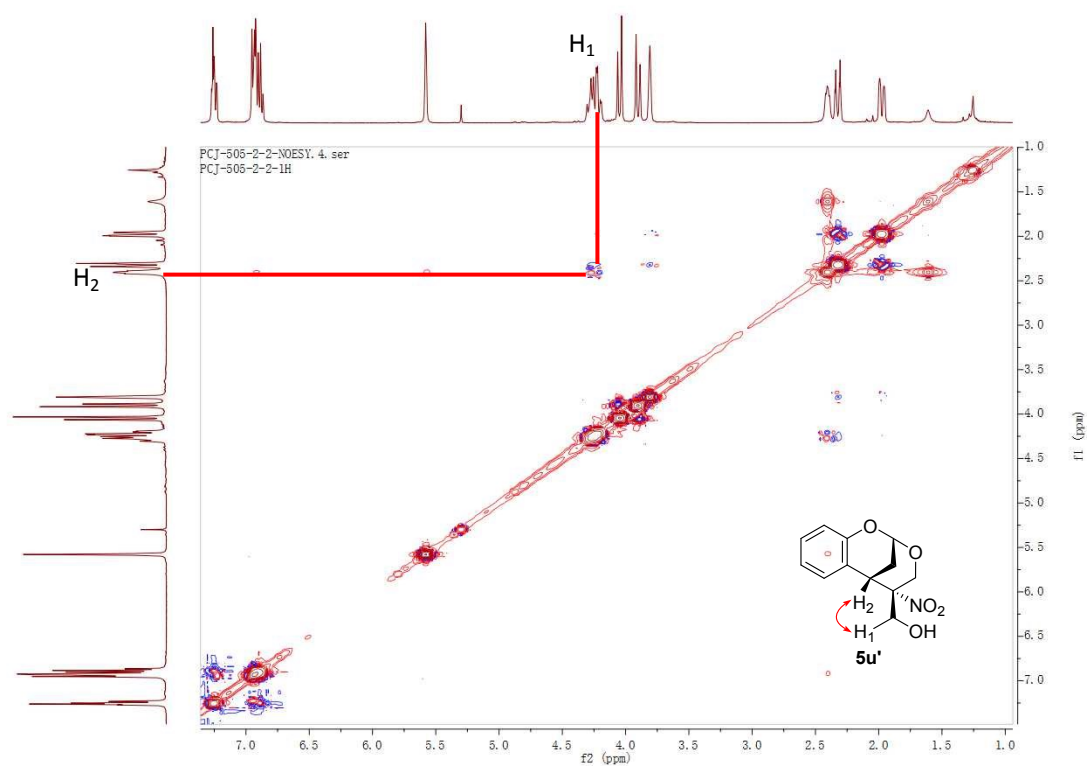

## The HPLC of racemic 5u'

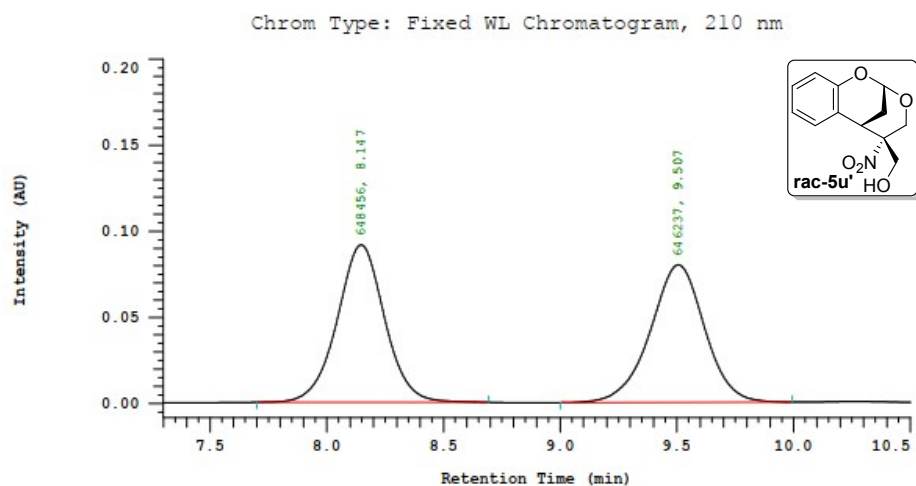

Chrom Type: Fixed WL Chromatogram, 210 nm  
 Peak Quantitation: AREA  
 Calculation Method: AREA%

| No. | RT    | Area    | Area %  | BC |
|-----|-------|---------|---------|----|
| 1   | 8.147 | 648456  | 50.086  | BB |
| 2   | 9.507 | 646237  | 49.914  | BB |
|     |       | 1294693 | 100.000 |    |

## The HPLC of chiral 5u'

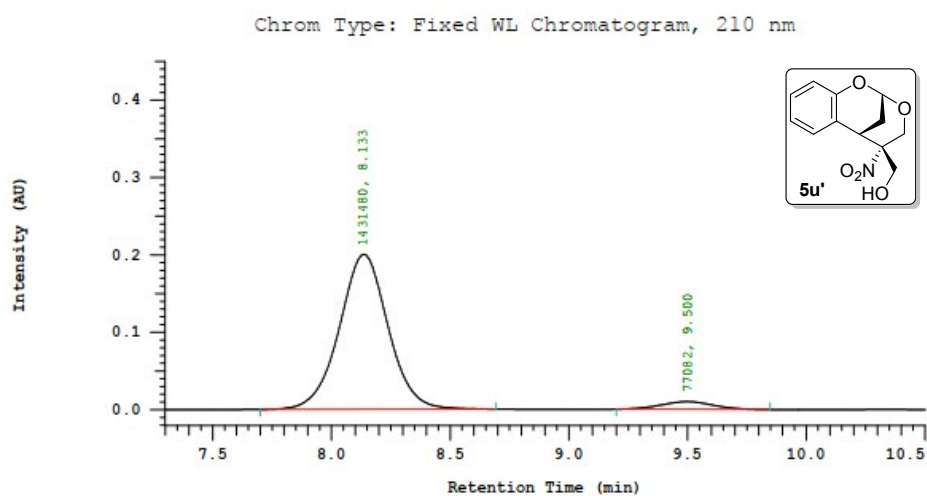

Chrom Type: Fixed WL Chromatogram, 210 nm  
 Peak Quantitation: AREA  
 Calculation Method: AREA%

| No. | RT    | Area    | Area %  | BC |
|-----|-------|---------|---------|----|
| 1   | 8.133 | 1431480 | 94.890  | BB |
| 2   | 9.500 | 77082   | 5.110   | BB |
|     |       | 1508562 | 100.000 |    |

### The $^1\text{H}$ NMR spectrum of 8a (400 MHz, $\text{CDCl}_3$ )

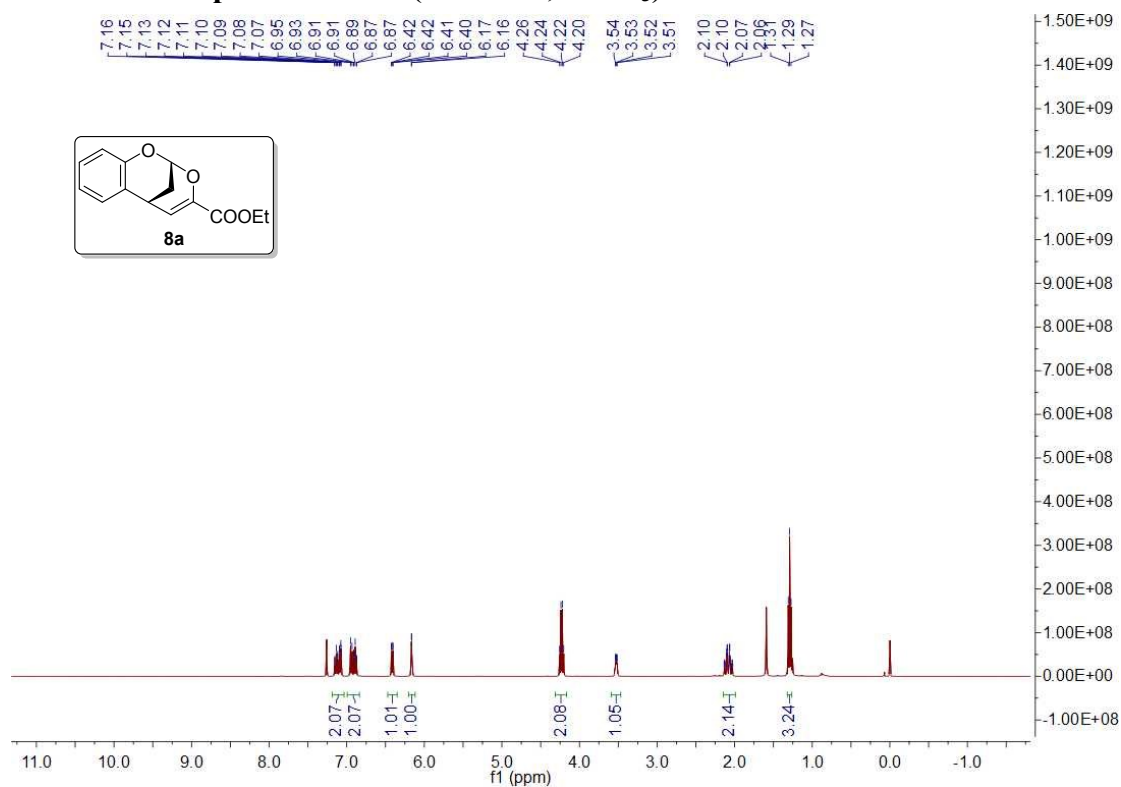

### The $^{13}\text{C}$ NMR spectrum of 8a (101 MHz, $\text{CDCl}_3$ )

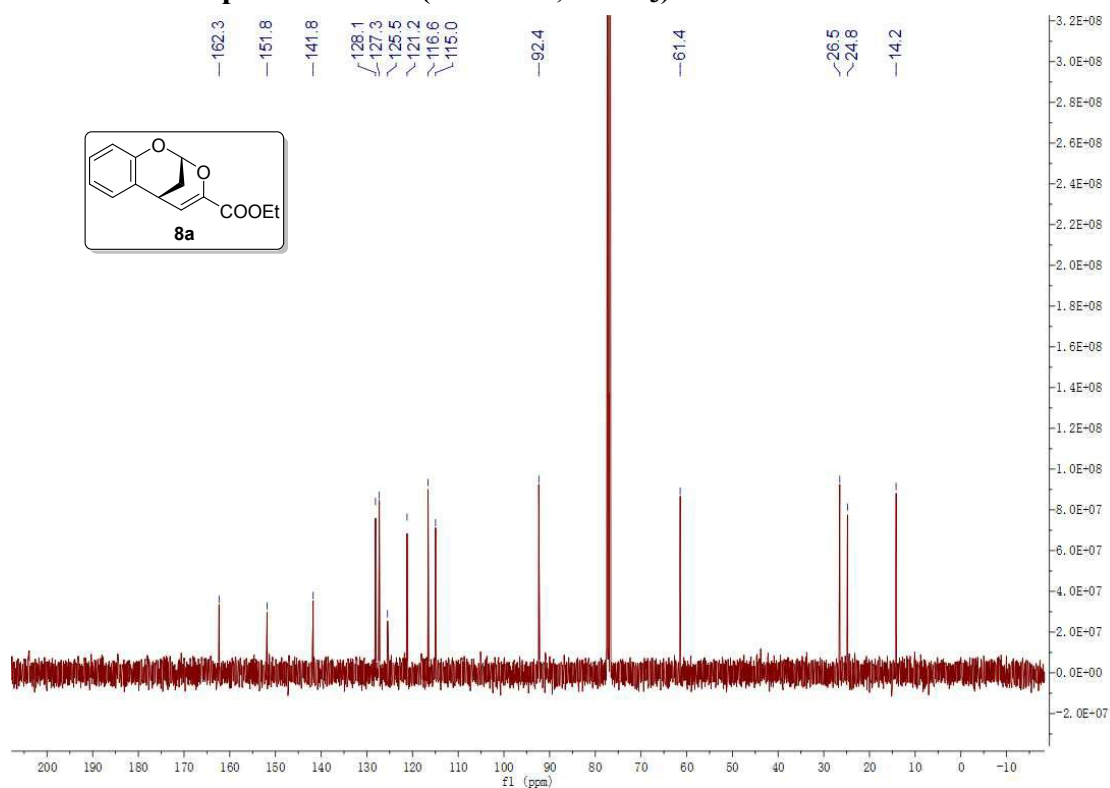

## The HPLC of racemic 8a

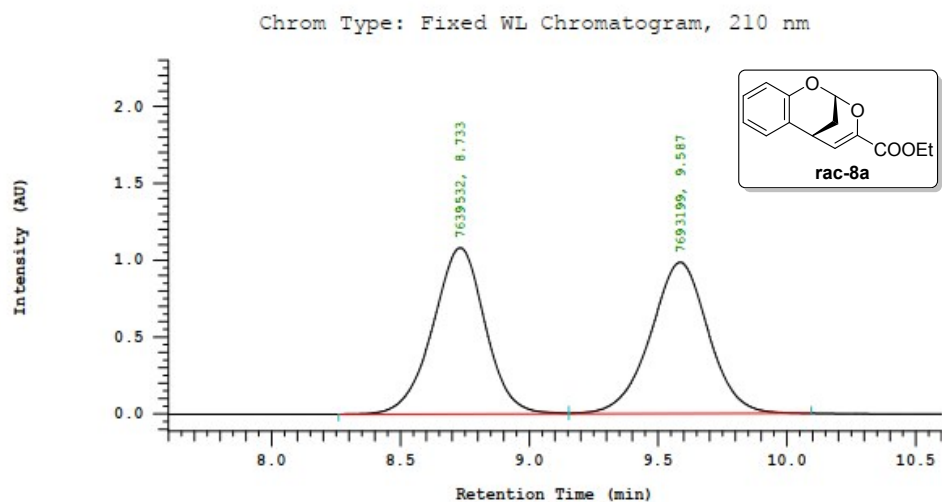

Chrom Type: Fixed WL Chromatogram, 210 nm  
 Peak Quantitation: AREA  
 Calculation Method: AREA%

| No. | RT    | Area     | Area %  | BC |
|-----|-------|----------|---------|----|
| 1   | 8.733 | 7639532  | 49.825  | BV |
| 2   | 9.587 | 7693199  | 50.175  | VB |
|     |       |          | 100.000 |    |
|     |       | 15332731 | 100.000 |    |

## The HPLC of chiral 8a

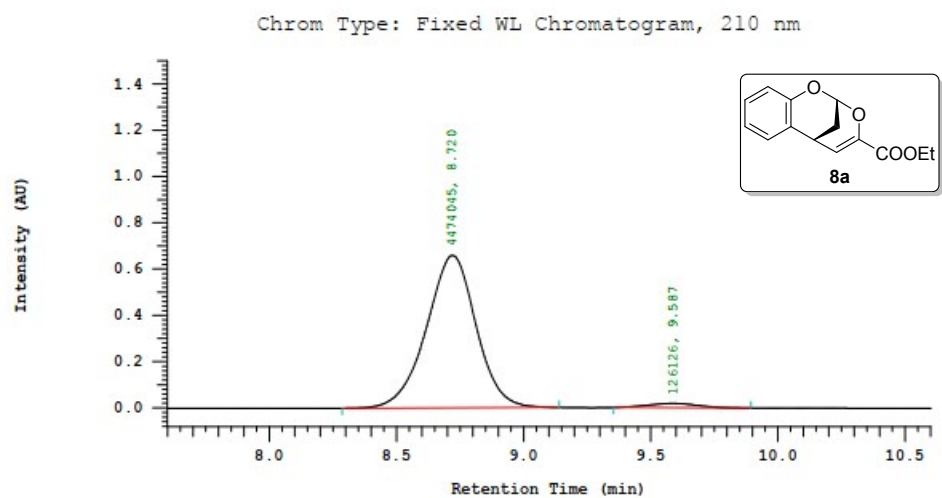

Chrom Type: Fixed WL Chromatogram, 210 nm  
 Peak Quantitation: AREA  
 Calculation Method: AREA%

| No. | RT    | Area    | Area %  | BC |
|-----|-------|---------|---------|----|
| 1   | 8.720 | 4474045 | 97.258  | BB |
| 2   | 9.587 | 126126  | 2.742   | BB |
|     |       |         | 100.000 |    |
|     |       | 4600171 | 100.000 |    |

The  $^1\text{H}$  NMR spectrum of **8b** (400 MHz,  $\text{CDCl}_3$ )

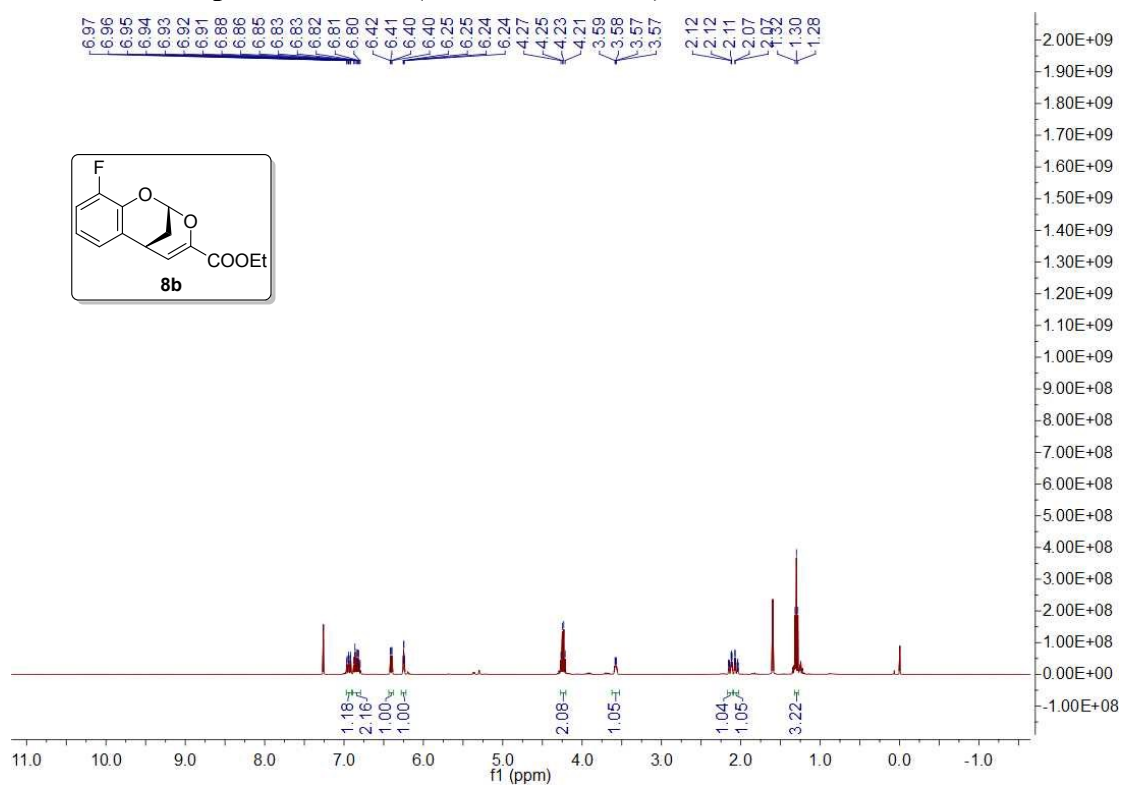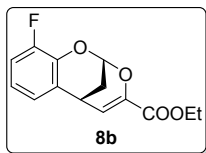

The  $^{13}\text{C}$  NMR spectrum of **8b** (101 MHz,  $\text{CDCl}_3$ )

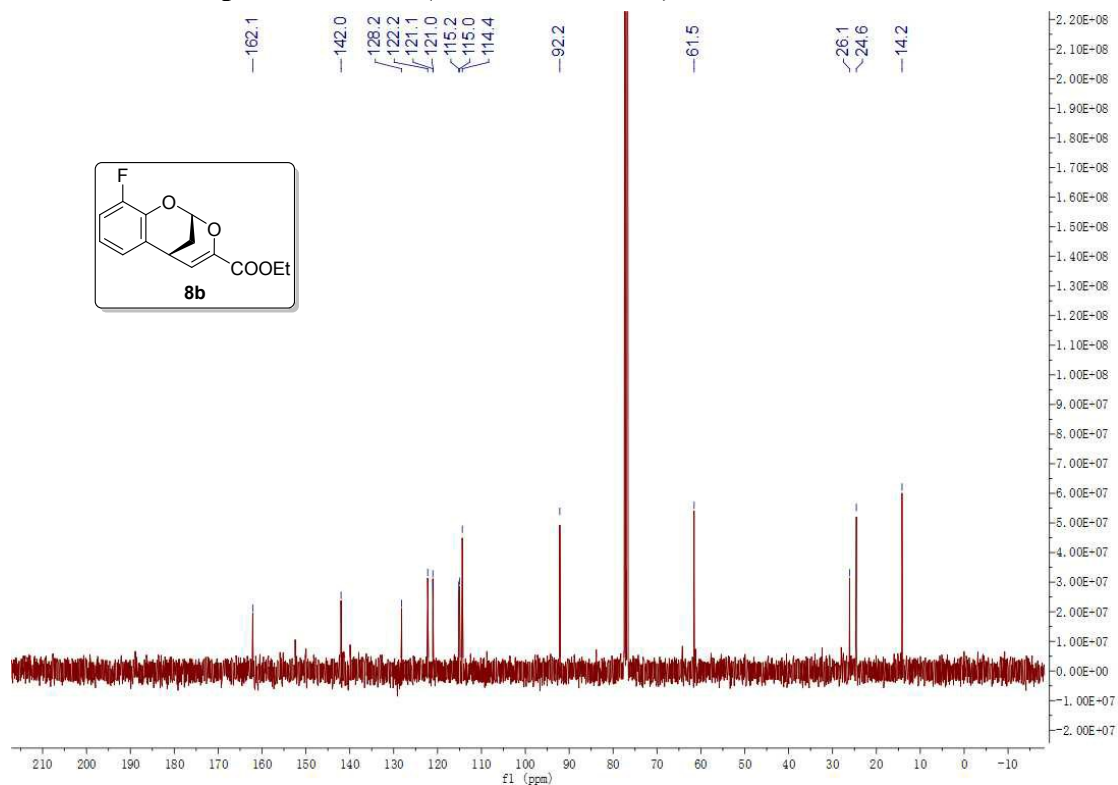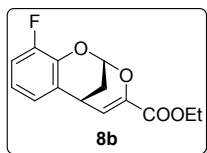

## The HPLC of racemic 8b

Chrom Type: Fixed WL Chromatogram, 210 nm

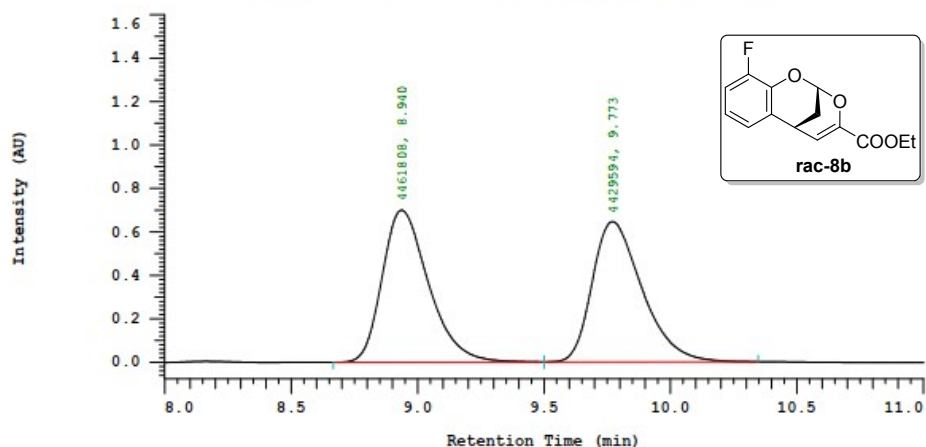

Chrom Type: Fixed WL Chromatogram, 210 nm

Peak Quantitation: AREA

Calculation Method: AREA%

| No. | RT    | Area    | Area %  | BC |
|-----|-------|---------|---------|----|
| 1   | 8.940 | 4461808 | 50.181  | BV |
| 2   | 9.773 | 4429594 | 49.819  | VB |
|     |       | 8891402 | 100.000 |    |

## The HPLC of chiral 8b

Chrom Type: Fixed WL Chromatogram, 210 nm

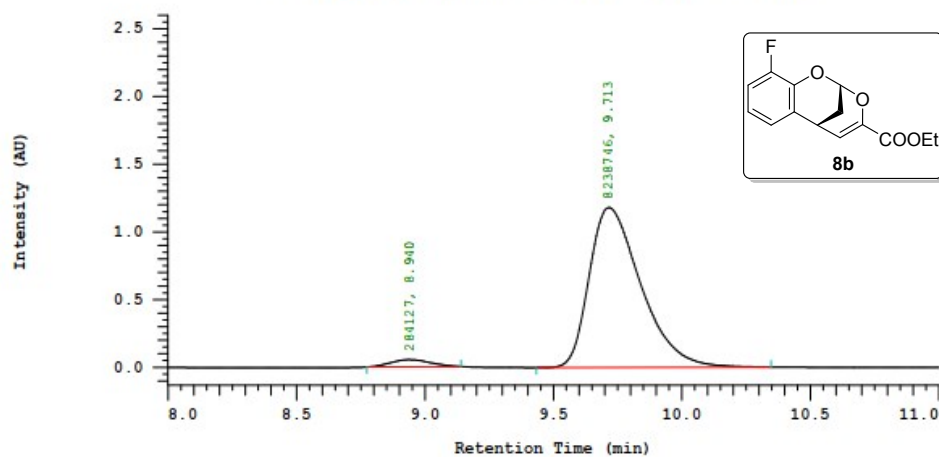

Chrom Type: Fixed WL Chromatogram, 210 nm

Peak Quantitation: AREA

Calculation Method: AREA%

| No. | RT    | Area    | Area %  | BC |
|-----|-------|---------|---------|----|
| 1   | 8.940 | 284127  | 3.334   | BB |
| 2   | 9.713 | 8238746 | 96.666  | BB |
|     |       | 8522873 | 100.000 |    |

### The $^1\text{H}$ NMR spectrum of **8c** (400 MHz, $\text{CDCl}_3$ )

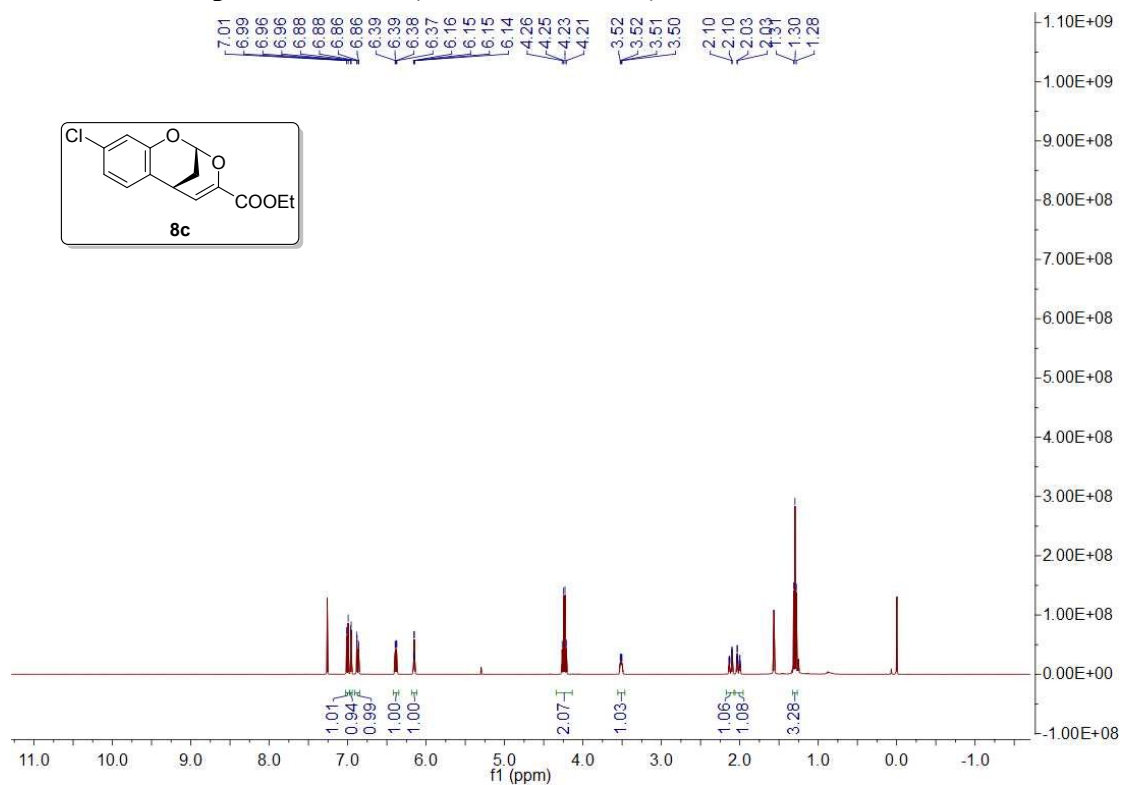

### The $^{13}\text{C}$ NMR spectrum of **8c** (101 MHz, $\text{CDCl}_3$ )

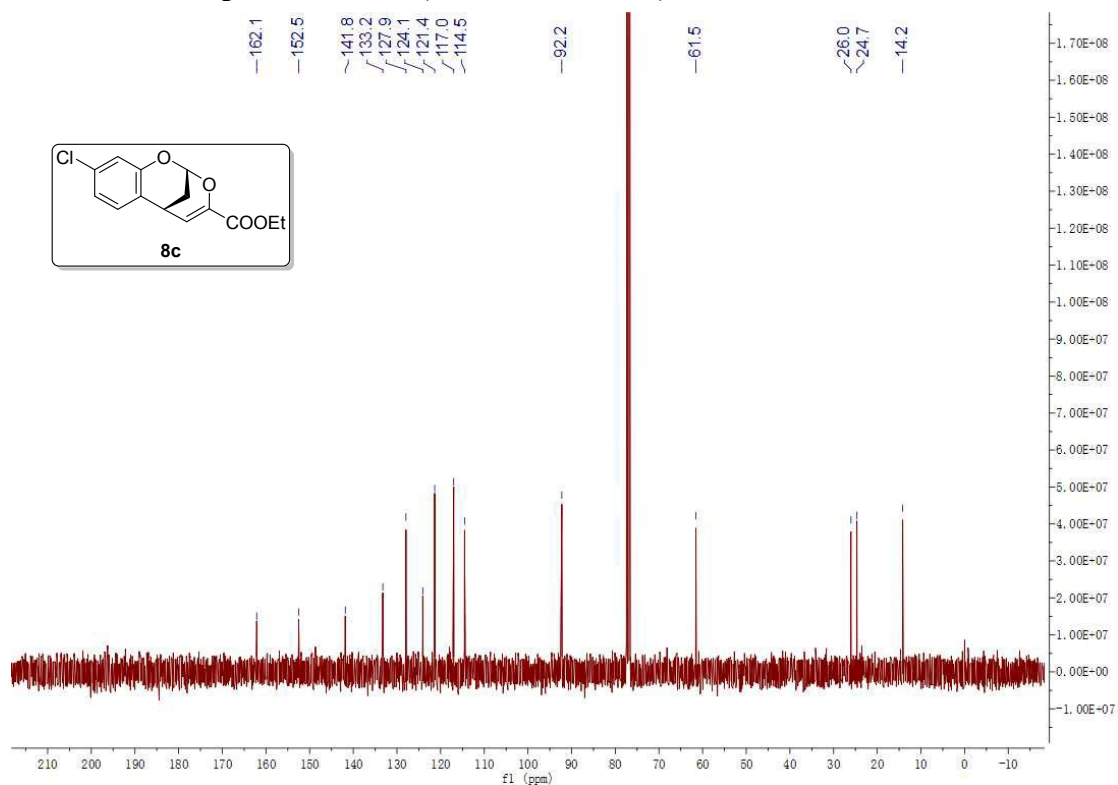



## The HPLC of racemic 8c

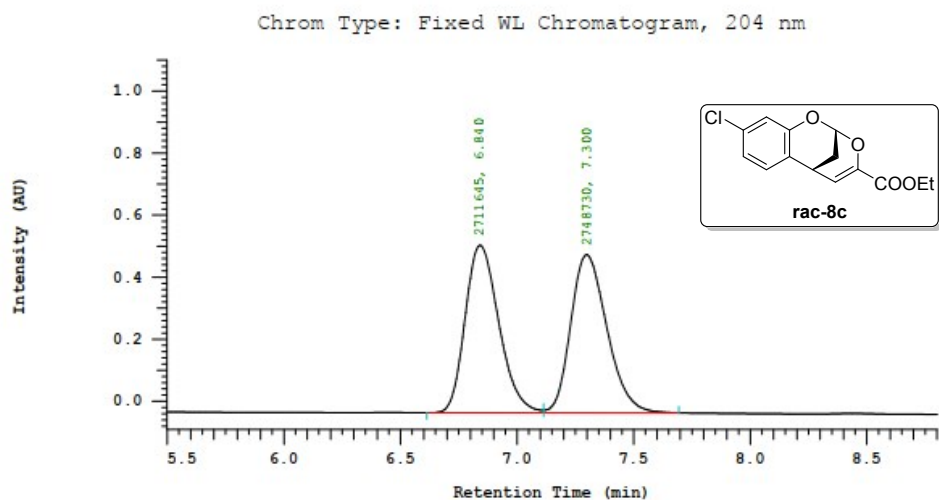

Chrom Type: Fixed WL Chromatogram, 204 nm  
 Peak Quantitation: AREA  
 Calculation Method: AREA%

| No. | RT    | Area    | Area %  | BC |
|-----|-------|---------|---------|----|
| 1   | 6.840 | 2711645 | 49.660  | BV |
| 2   | 7.300 | 2748730 | 50.340  | VB |
|     |       | 5460375 | 100.000 |    |

## The HPLC of chiral 8c

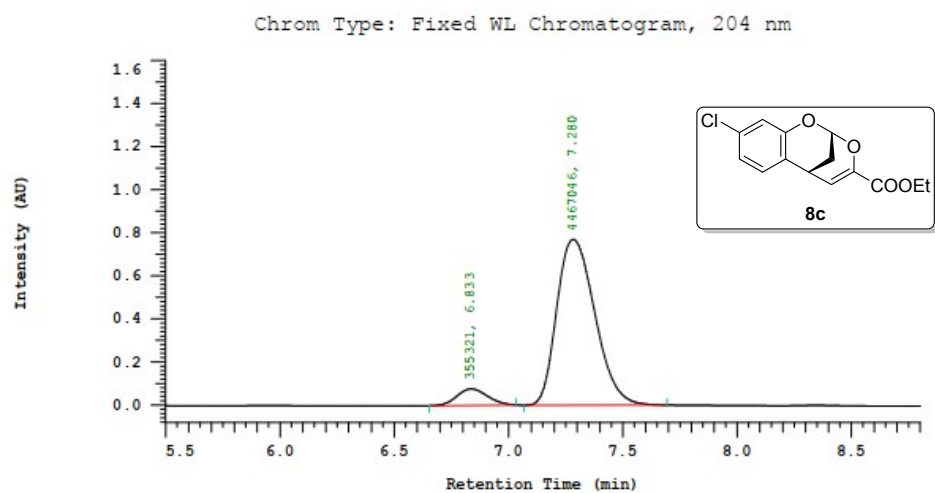

Chrom Type: Fixed WL Chromatogram, 204 nm  
 Peak Quantitation: AREA  
 Calculation Method: AREA%

| No. | RT    | Area    | Area %  | BC |
|-----|-------|---------|---------|----|
| 1   | 6.833 | 355321  | 7.368   | BB |
| 2   | 7.280 | 4467046 | 92.632  | BB |
|     |       | 4822367 | 100.000 |    |

### The <sup>1</sup>H NMR spectrum of 8d (400 MHz, CDCl<sub>3</sub>)

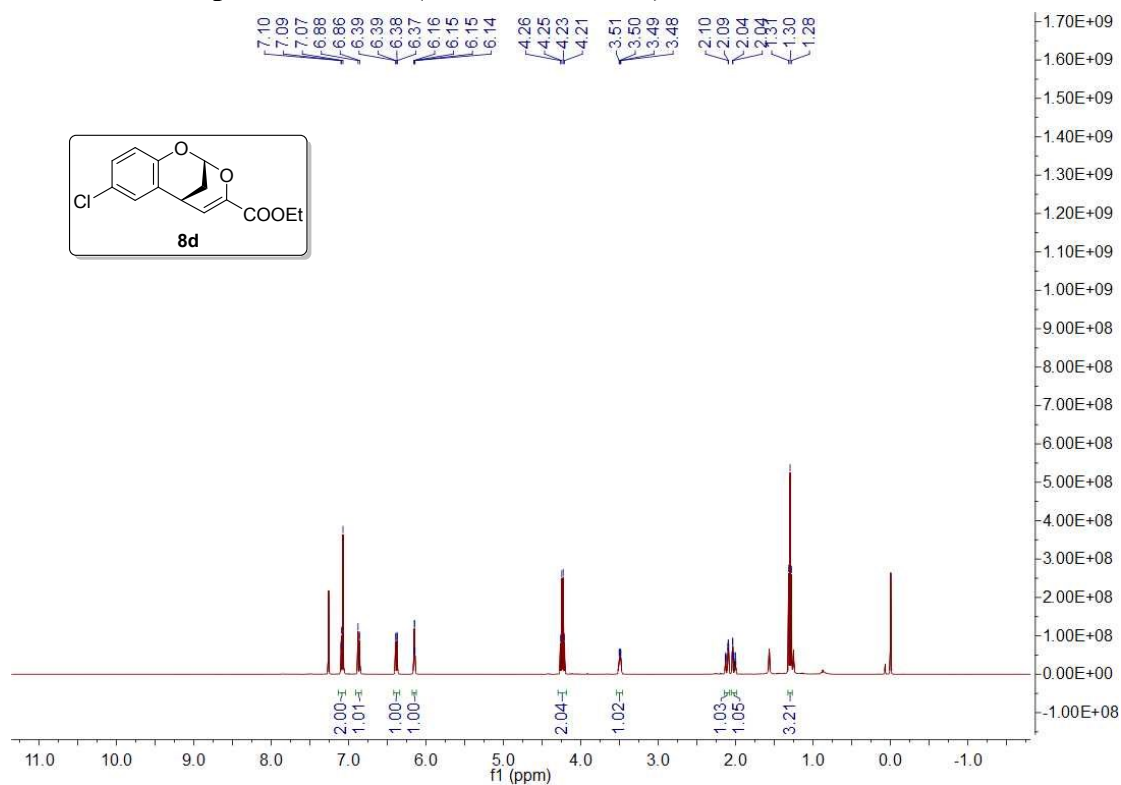

### The <sup>13</sup>C NMR spectrum of 8d (101 MHz, CDCl<sub>3</sub>)

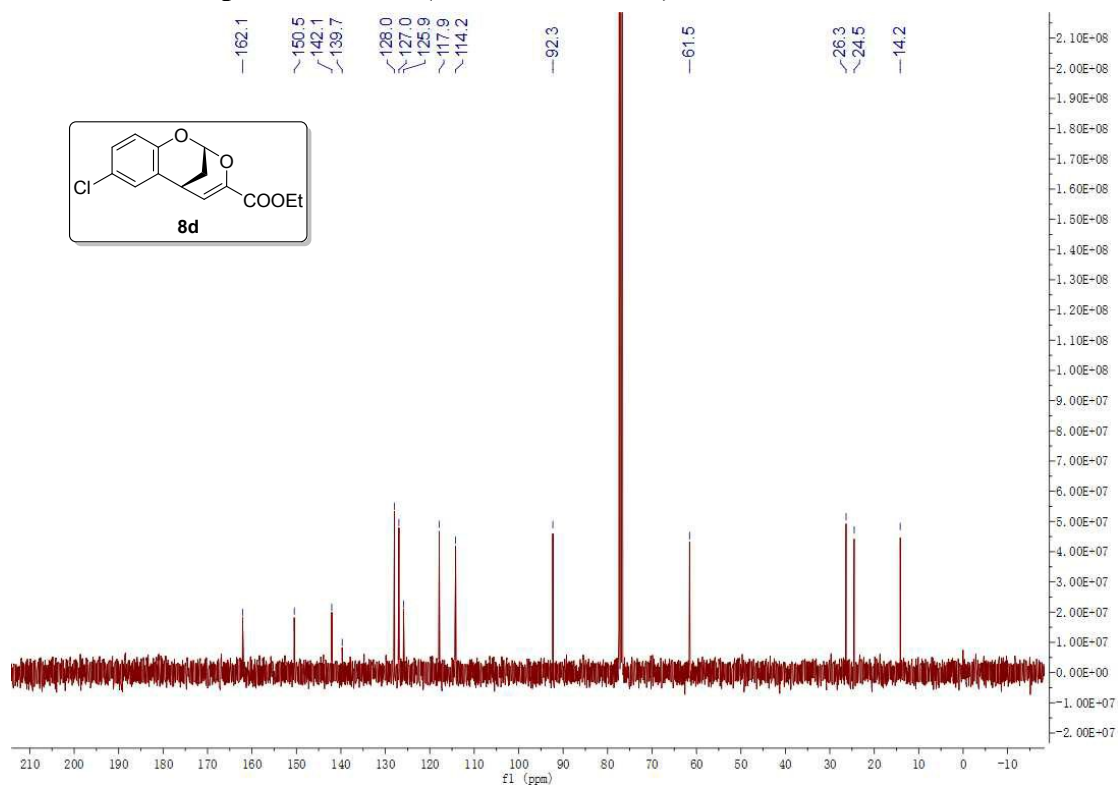

## The HPLC of racemic 8d

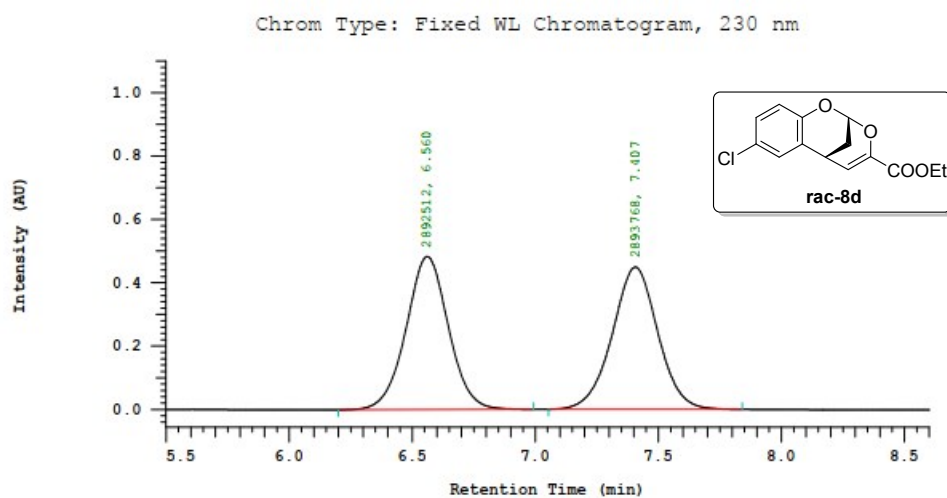

Chrom Type: Fixed WL Chromatogram, 230 nm

Peak Quantitation: AREA

Calculation Method: AREA%

| No. | RT    | Area    | Area %  | BC |
|-----|-------|---------|---------|----|
| 1   | 6.560 | 2892512 | 49.989  | BB |
| 2   | 7.407 | 2893768 | 50.011  | BB |
|     |       | 5786280 | 100.000 |    |

## The HPLC of chiral 8d

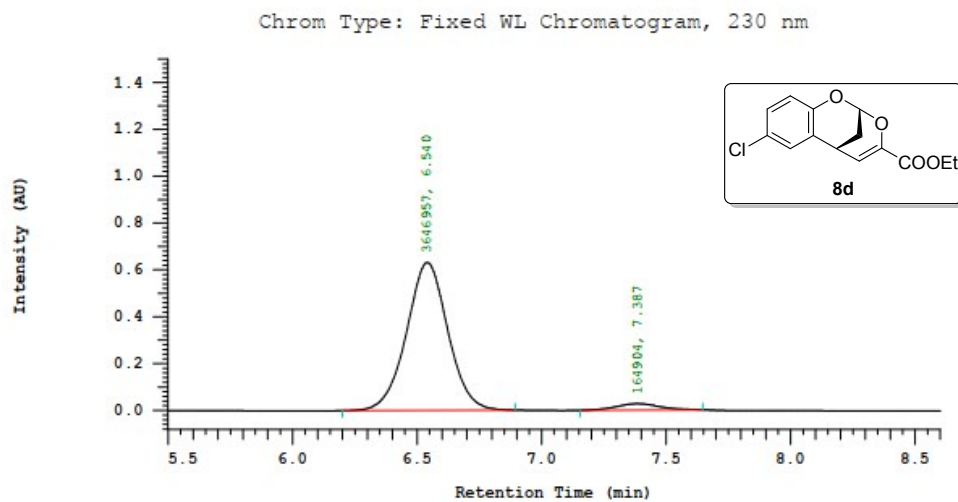

Chrom Type: Fixed WL Chromatogram, 230 nm

Peak Quantitation: AREA

Calculation Method: AREA%

| No. | RT    | Area    | Area %  | BC |
|-----|-------|---------|---------|----|
| 1   | 6.540 | 3646957 | 95.674  | BB |
| 2   | 7.387 | 164904  | 4.326   | BB |
|     |       | 3811861 | 100.000 |    |

### The $^1\text{H}$ NMR spectrum of **8e** (400 MHz, $\text{CDCl}_3$ )

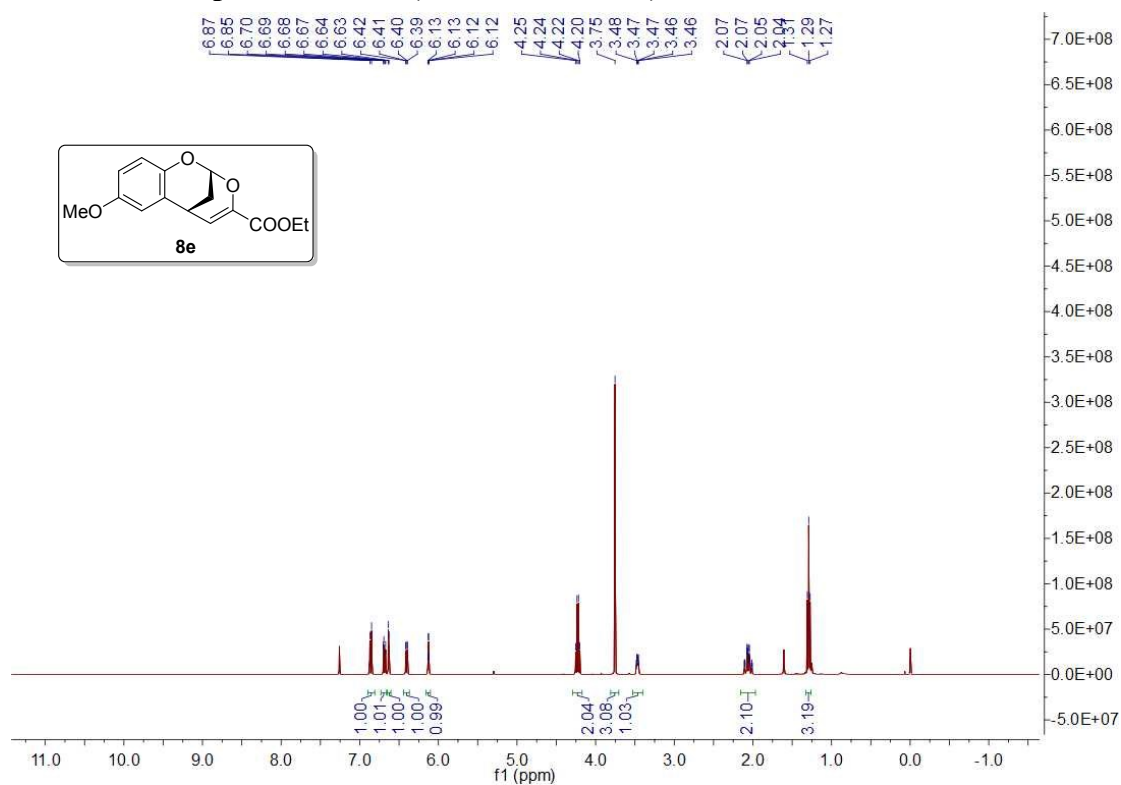

### The $^{13}\text{C}$ NMR spectrum of **8e** (101 MHz, $\text{CDCl}_3$ )

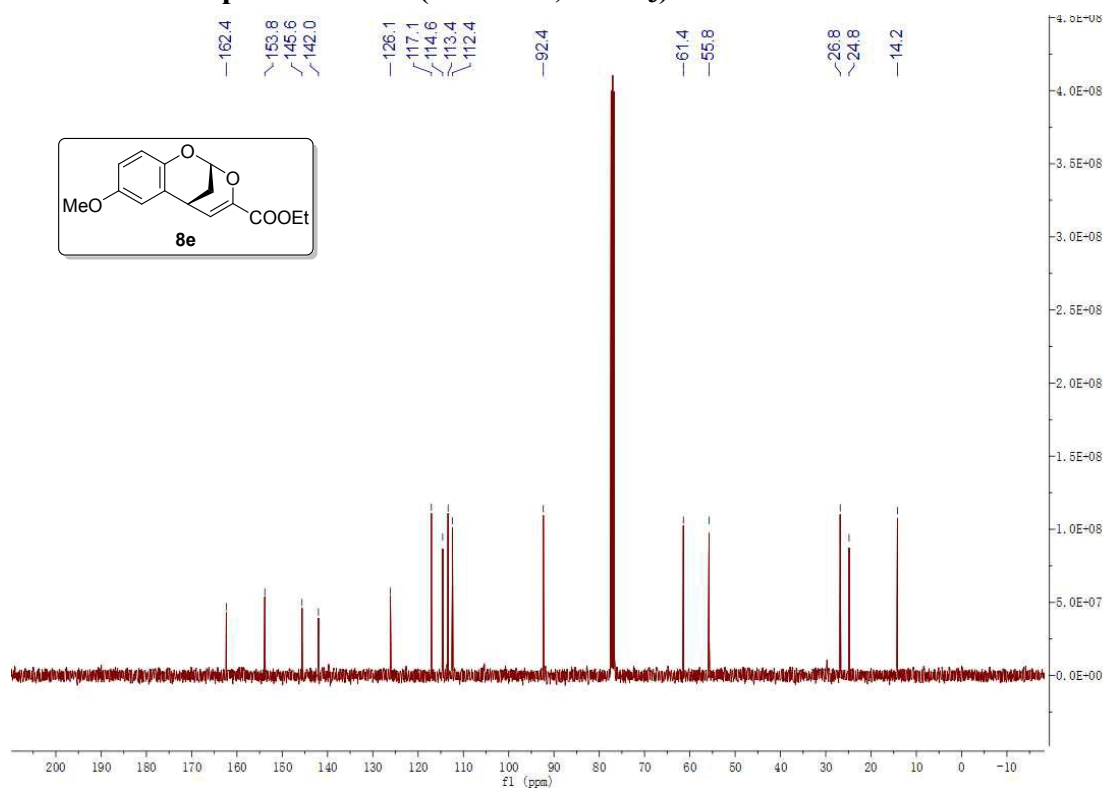

## The HPLC of racemic 8e

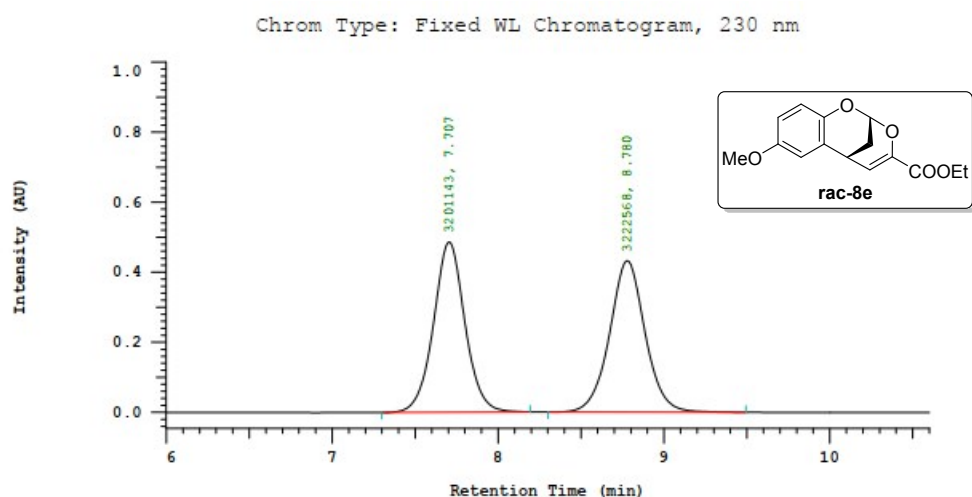

Chrom Type: Fixed WL Chromatogram, 230 nm

Peak Quantitation: AREA

Calculation Method: AREA%

| No. | RT    | Area    | Area %  | BC |
|-----|-------|---------|---------|----|
| 1   | 7.707 | 3201143 | 49.833  | BB |
| 2   | 8.780 | 3222568 | 50.167  | BB |
|     |       | 6423711 | 100.000 |    |

## The HPLC of chiral 8e

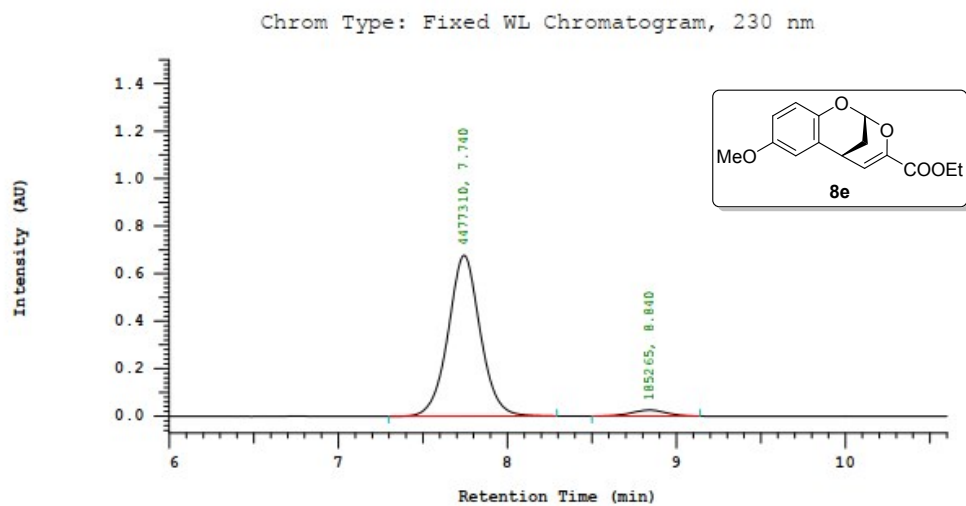

Chrom Type: Fixed WL Chromatogram, 230 nm

Peak Quantitation: AREA

Calculation Method: AREA%

| No. | RT    | Area    | Area %  | BC |
|-----|-------|---------|---------|----|
| 1   | 7.740 | 4477310 | 96.027  | BB |
| 2   | 8.840 | 185265  | 3.973   | BB |
|     |       | 4662575 | 100.000 |    |

### The <sup>1</sup>H NMR spectrum of 8f (400 MHz, CDCl<sub>3</sub>)

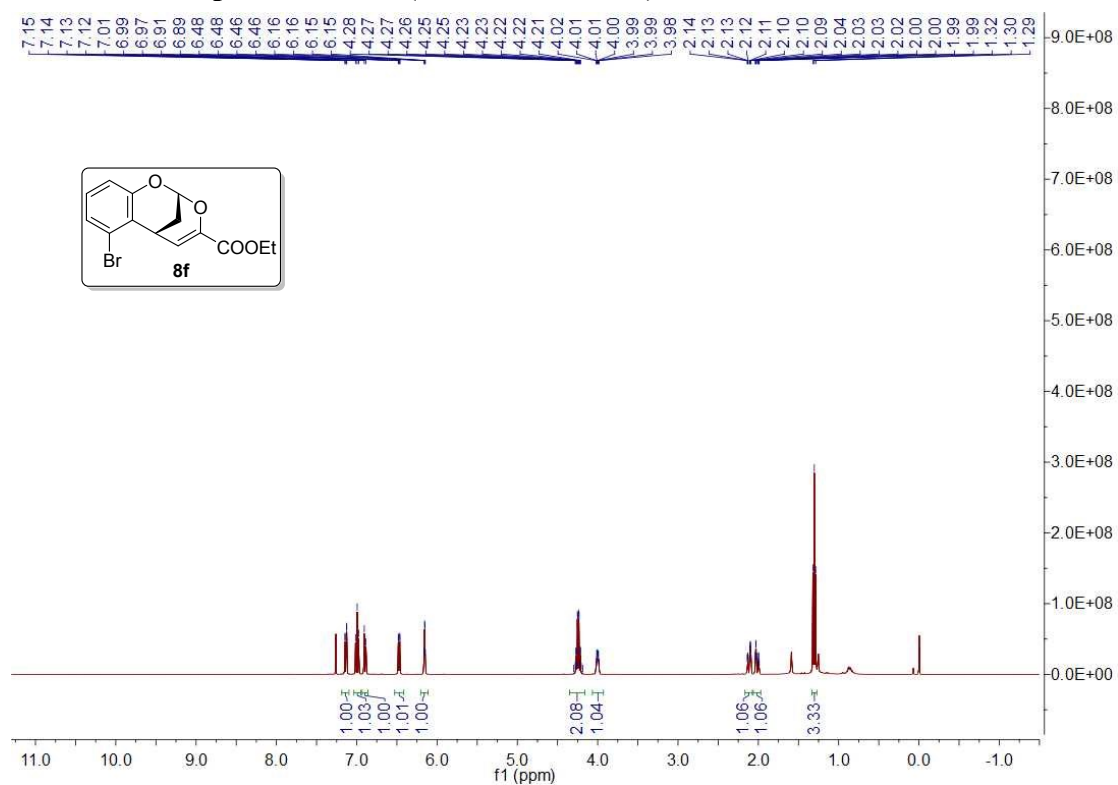

### The <sup>13</sup>C NMR spectrum of 8f (101 MHz, CDCl<sub>3</sub>)

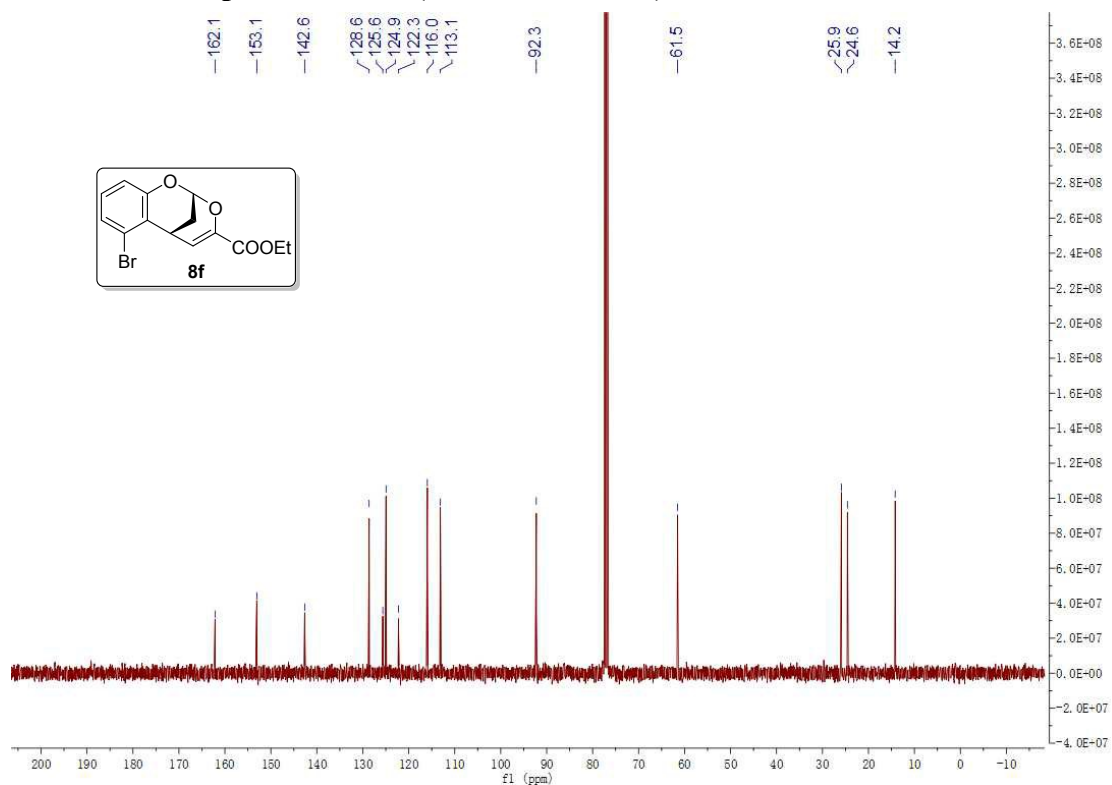

## The HPLC of racemic 8f

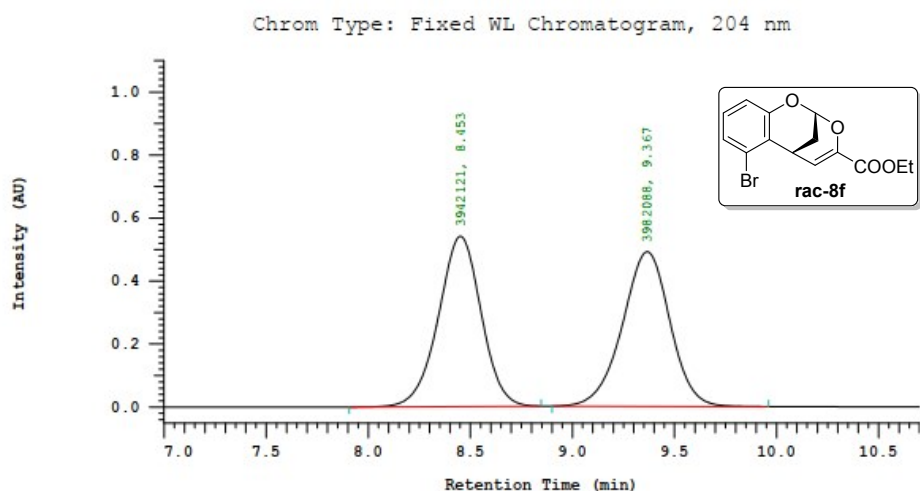

Chrom Type: Fixed WL Chromatogram, 204 nm  
 Peak Quantitation: AREA  
 Calculation Method: AREA%

| No. | RT    | Area    | Area %  | BC |
|-----|-------|---------|---------|----|
| 1   | 8.453 | 3942121 | 49.748  | BB |
| 2   | 9.367 | 3982088 | 50.252  | BB |
|     |       | 7924209 | 100.000 |    |

## The HPLC of chiral 8f

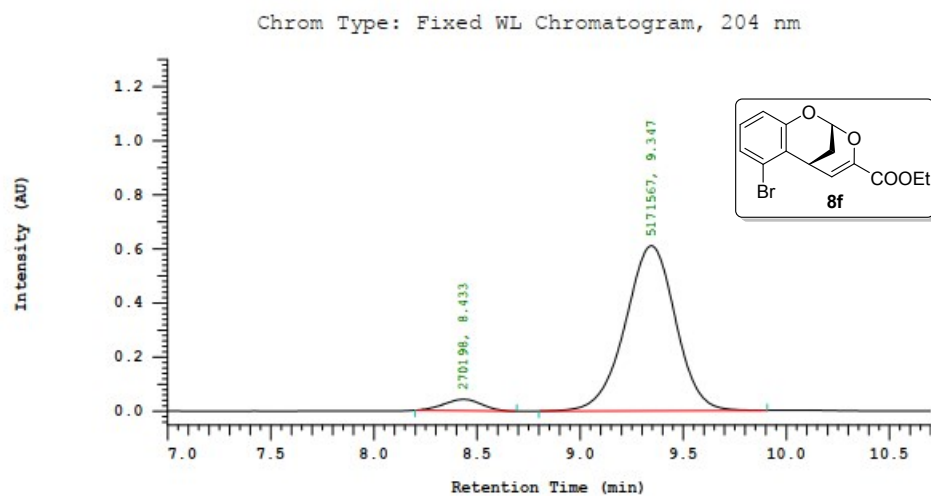

Chrom Type: Fixed WL Chromatogram, 204 nm  
 Peak Quantitation: AREA  
 Calculation Method: AREA%

| No. | RT    | Area    | Area %  | BC |
|-----|-------|---------|---------|----|
| 1   | 8.433 | 270198  | 4.965   | BB |
| 2   | 9.347 | 5171567 | 95.035  | BB |
|     |       | 5441765 | 100.000 |    |

### The $^1\text{H}$ NMR spectrum of 13 (400 MHz, $\text{CDCl}_3$ )

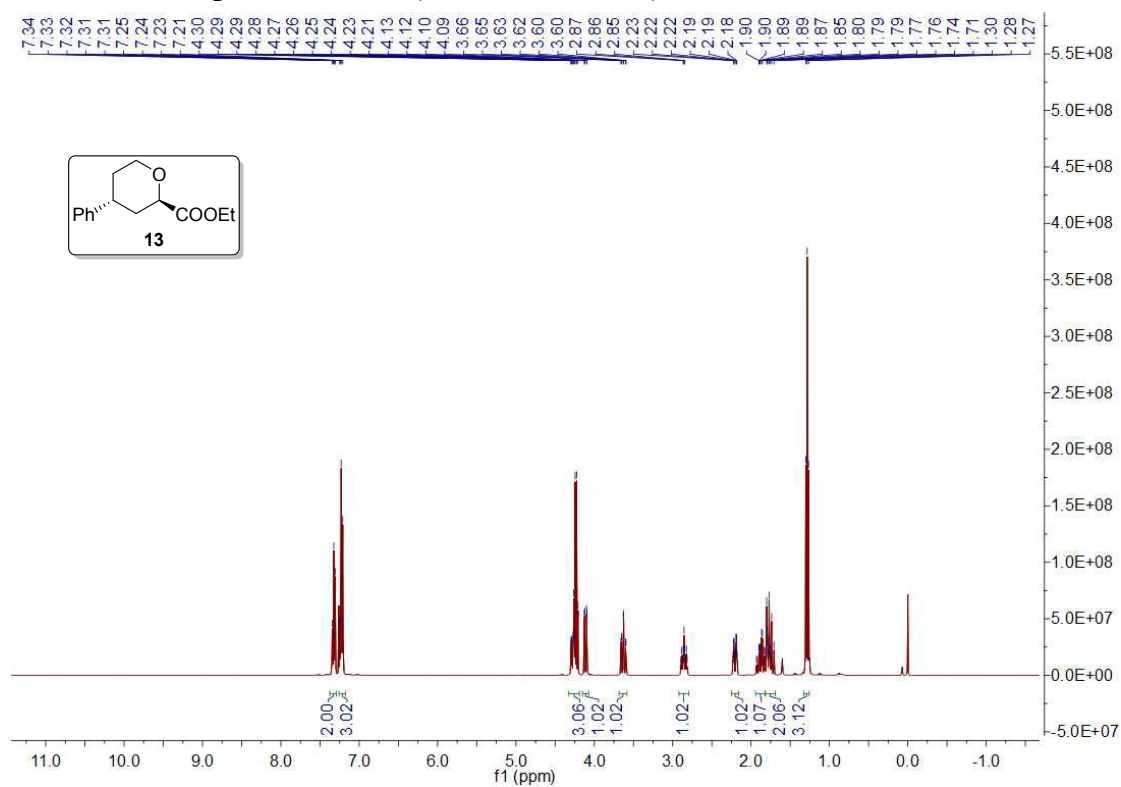

### The $^{13}\text{C}$ NMR spectrum of 13 (101 MHz, $\text{CDCl}_3$ )

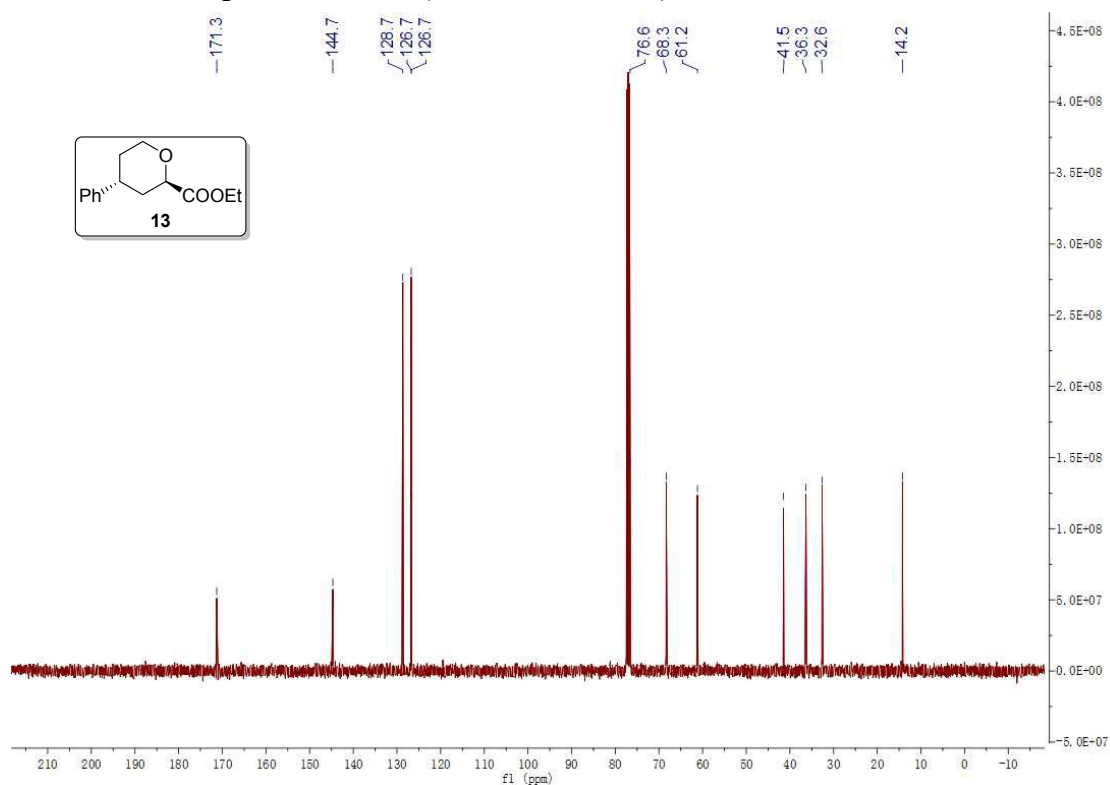



The HMBC spectrum of 13 (500 MHz, CDCl<sub>3</sub>)

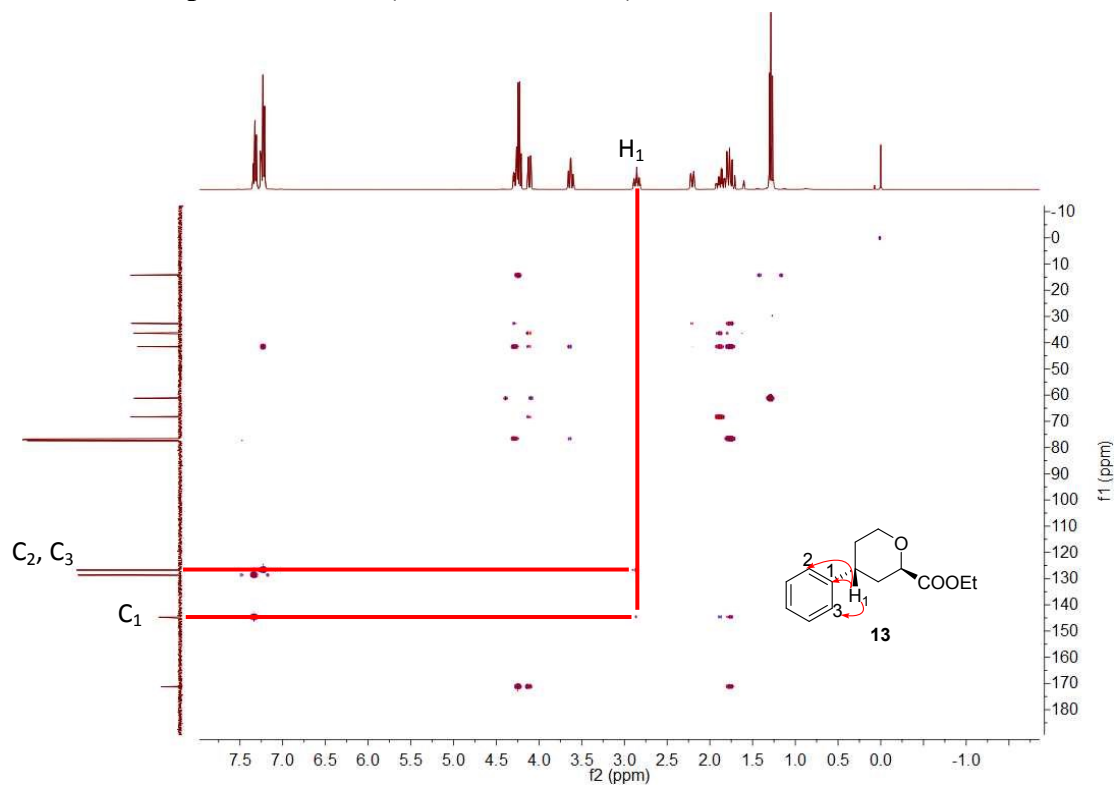

The NOSEY spectrum of 13 (400 MHz, CDCl<sub>3</sub>)

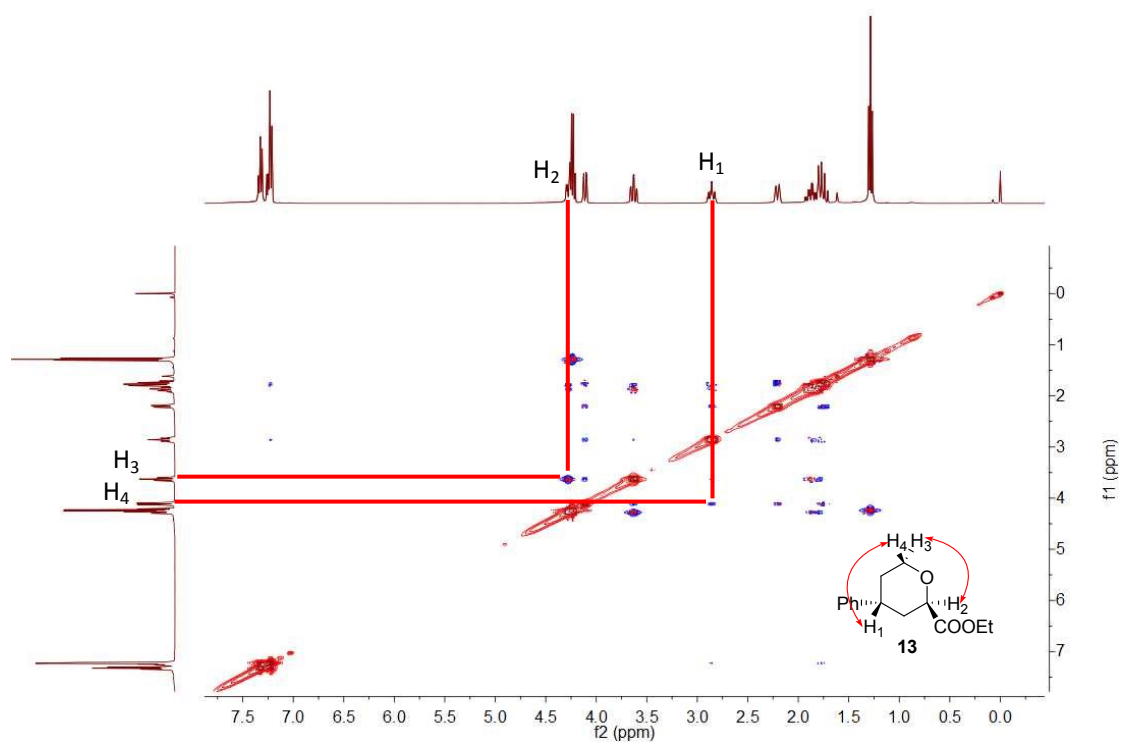

## The HPLC of racemic 13

Chrom Type: Fixed WL Chromatogram, 210 nm

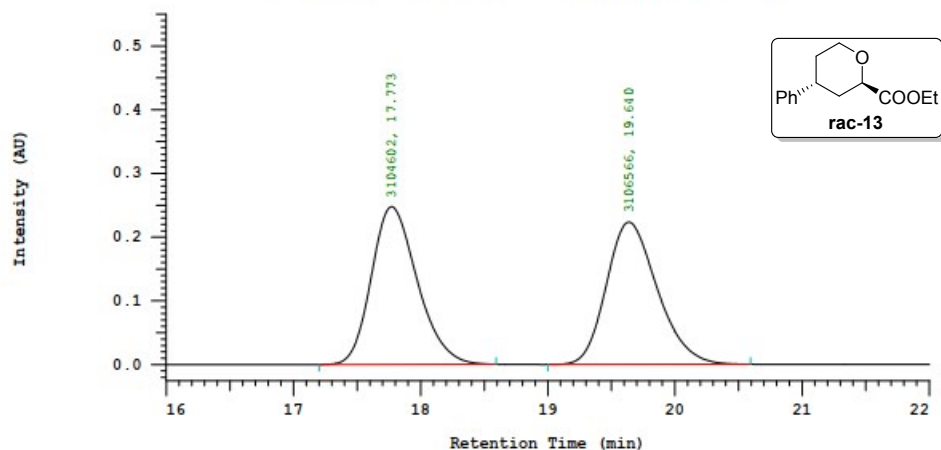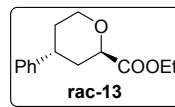

Chrom Type: Fixed WL Chromatogram, 210 nm

Peak Quantitation: AREA  
Calculation Method: AREA%

| No. | RT     | Area    | Area %  | BC |
|-----|--------|---------|---------|----|
| 1   | 17.773 | 3104602 | 49.984  | BB |
| 2   | 19.640 | 3106566 | 50.016  | BB |
|     |        | 6211168 | 100.000 |    |

## The HPLC of chiral 13

Chrom Type: Fixed WL Chromatogram, 210 nm

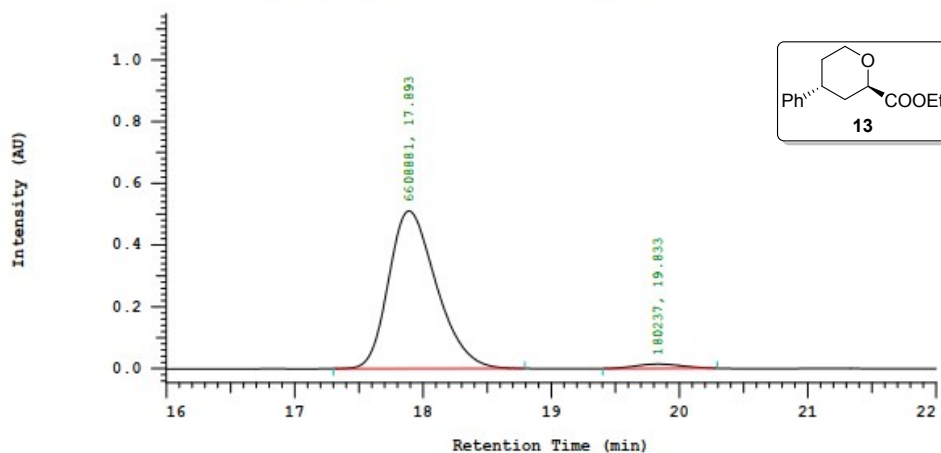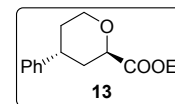

Chrom Type: Fixed WL Chromatogram, 210 nm

Peak Quantitation: AREA  
Calculation Method: AREA%

| No. | RT     | Area    | Area %  | BC |
|-----|--------|---------|---------|----|
| 1   | 17.893 | 6608881 | 97.345  | BB |
| 2   | 19.833 | 180237  | 2.655   | BB |
|     |        | 6789118 | 100.000 |    |

### The $^1\text{H}$ NMR spectrum of 16 (400 MHz, $\text{CDCl}_3$ )

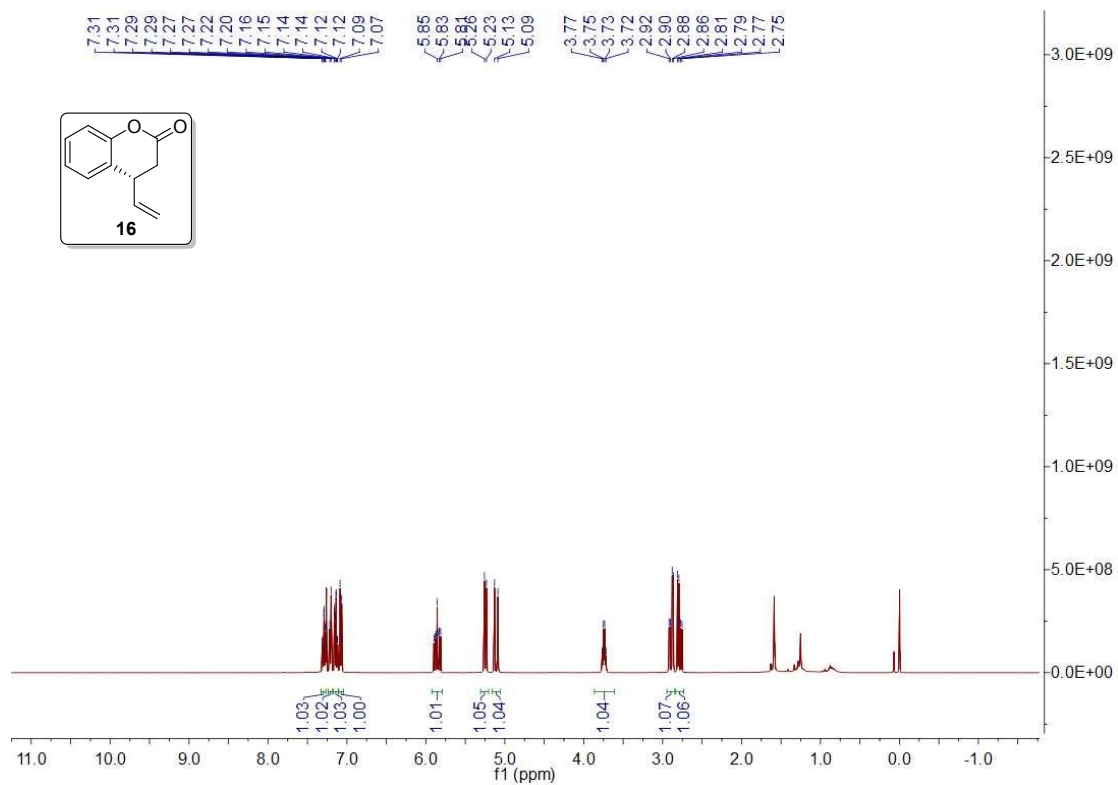

### The $^{13}\text{C}$ NMR spectrum of 16 (101 MHz, $\text{CDCl}_3$ )

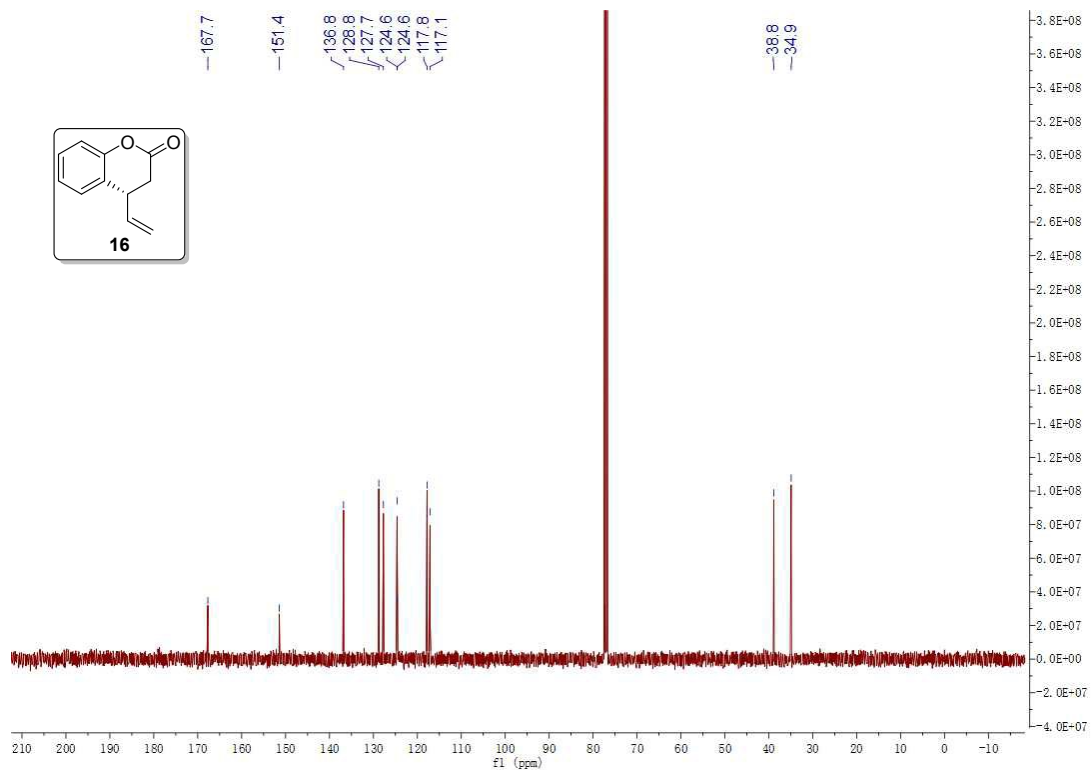

## The HPLC of racemic 16

Chrom Type: Fixed WL Chromatogram, 204 nm

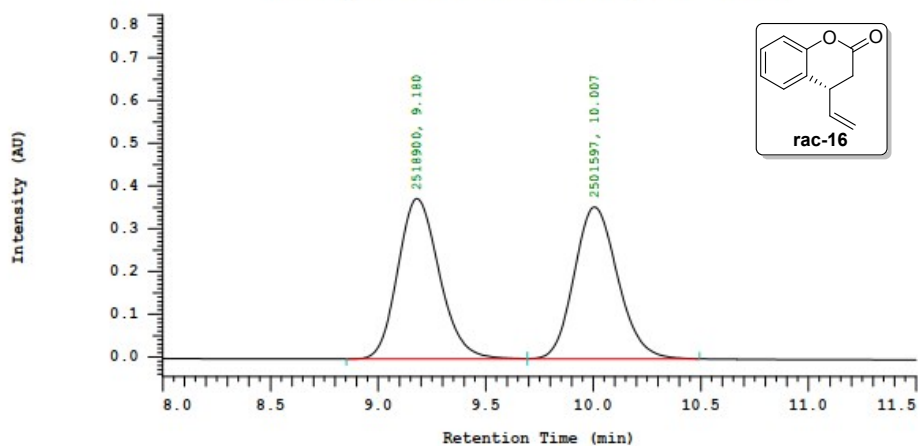

Chrom Type: Fixed WL Chromatogram, 204 nm

Peak Quantitation: AREA  
Calculation Method: AREA%

| No. | RT     | Area    | Area %  | BC |
|-----|--------|---------|---------|----|
| 1   | 9.180  | 2518900 | 50.172  | BV |
| 2   | 10.007 | 2501597 | 49.828  | VB |
|     |        | 5020497 | 100.000 |    |

## The HPLC of chiral 16

Chrom Type: Fixed WL Chromatogram, 204 nm

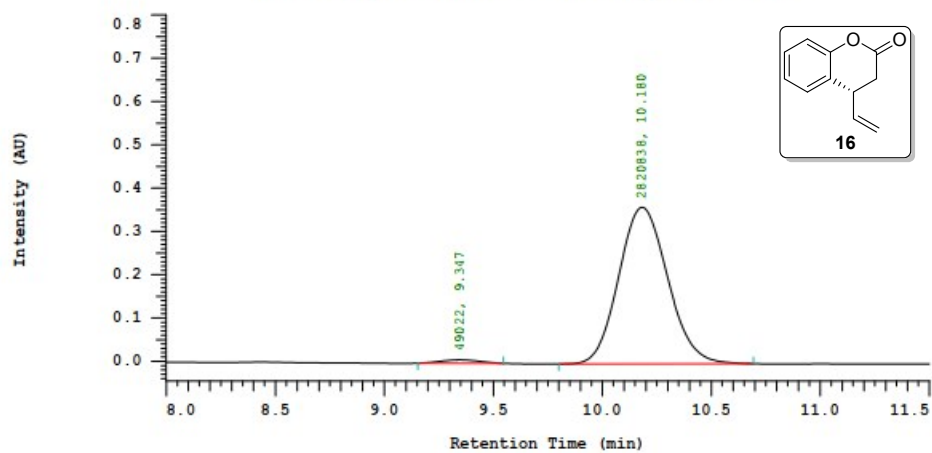

Chrom Type: Fixed WL Chromatogram, 204 nm

Peak Quantitation: AREA  
Calculation Method: AREA%

| No. | RT     | Area    | Area %  | BC |
|-----|--------|---------|---------|----|
| 1   | 9.347  | 49022   | 1.708   | BB |
| 2   | 10.180 | 2820838 | 98.292  | BB |
|     |        | 2869860 | 100.000 |    |

### The $^1\text{H}$ NMR spectrum of 19 (400 MHz, $\text{CDCl}_3$ )

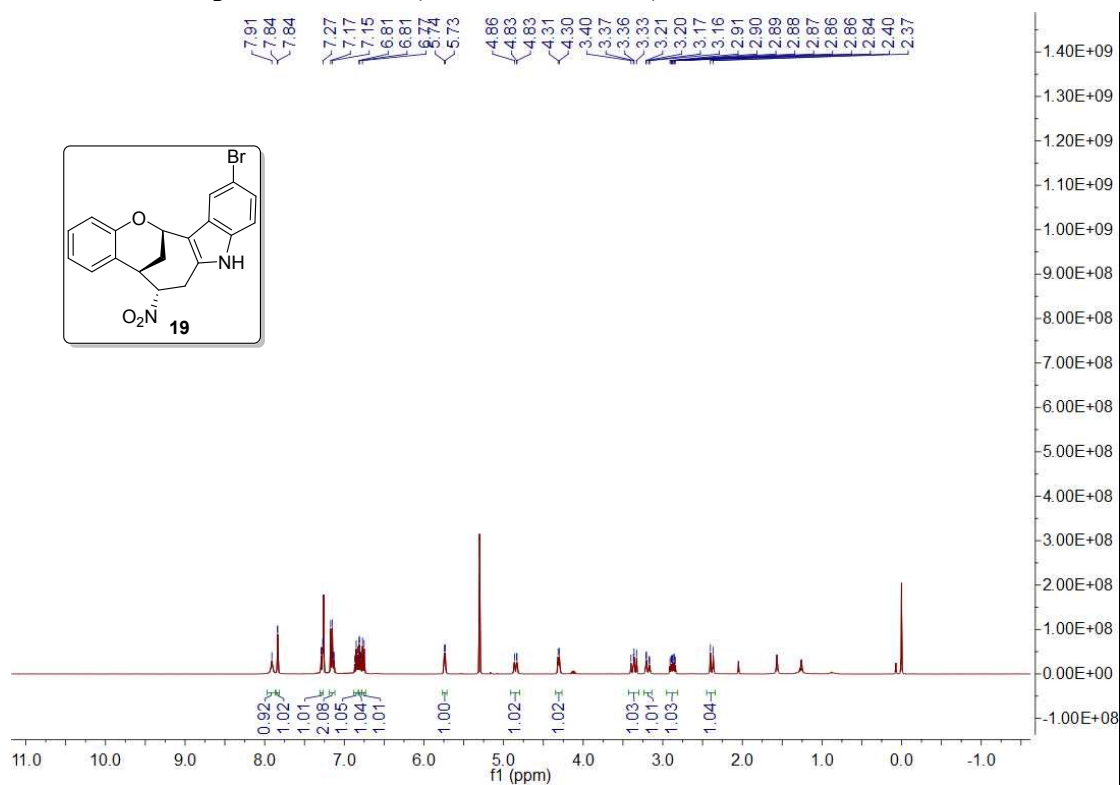

### The $^{13}\text{C}$ NMR spectrum of 19 (101 MHz, $\text{CDCl}_3$ )

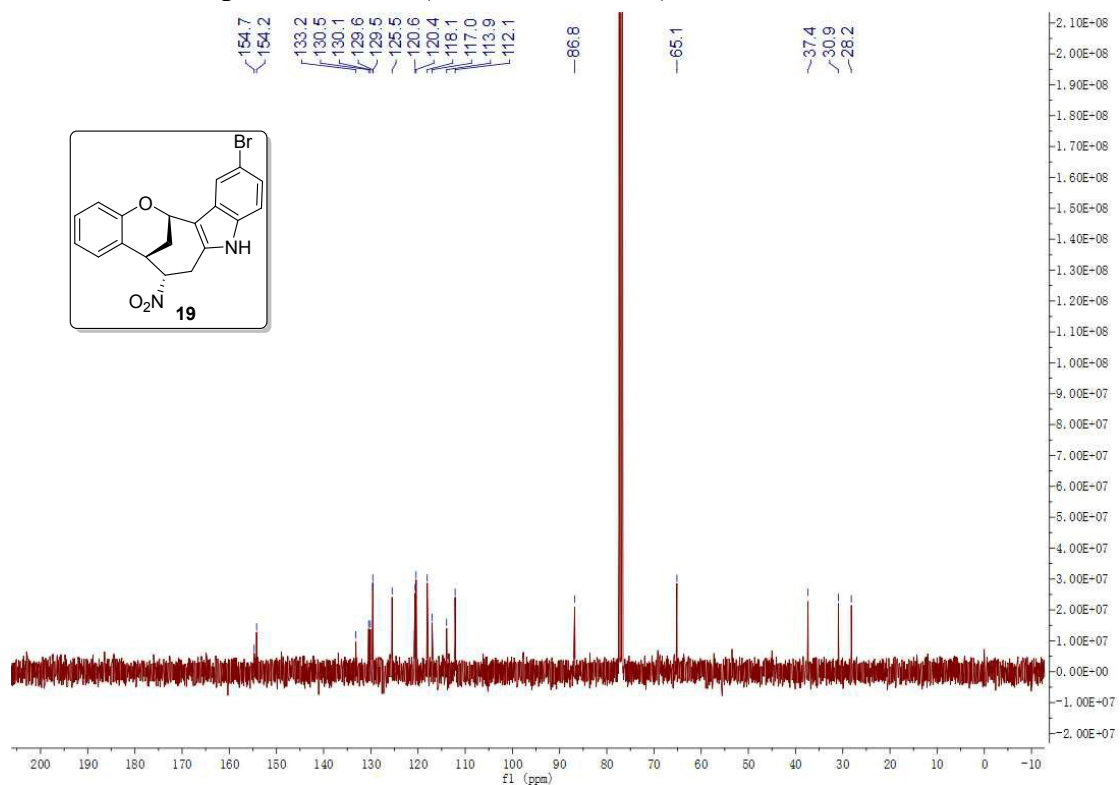

The NOSEY spectrum of 19 (400 MHz, CDCl<sub>3</sub>)

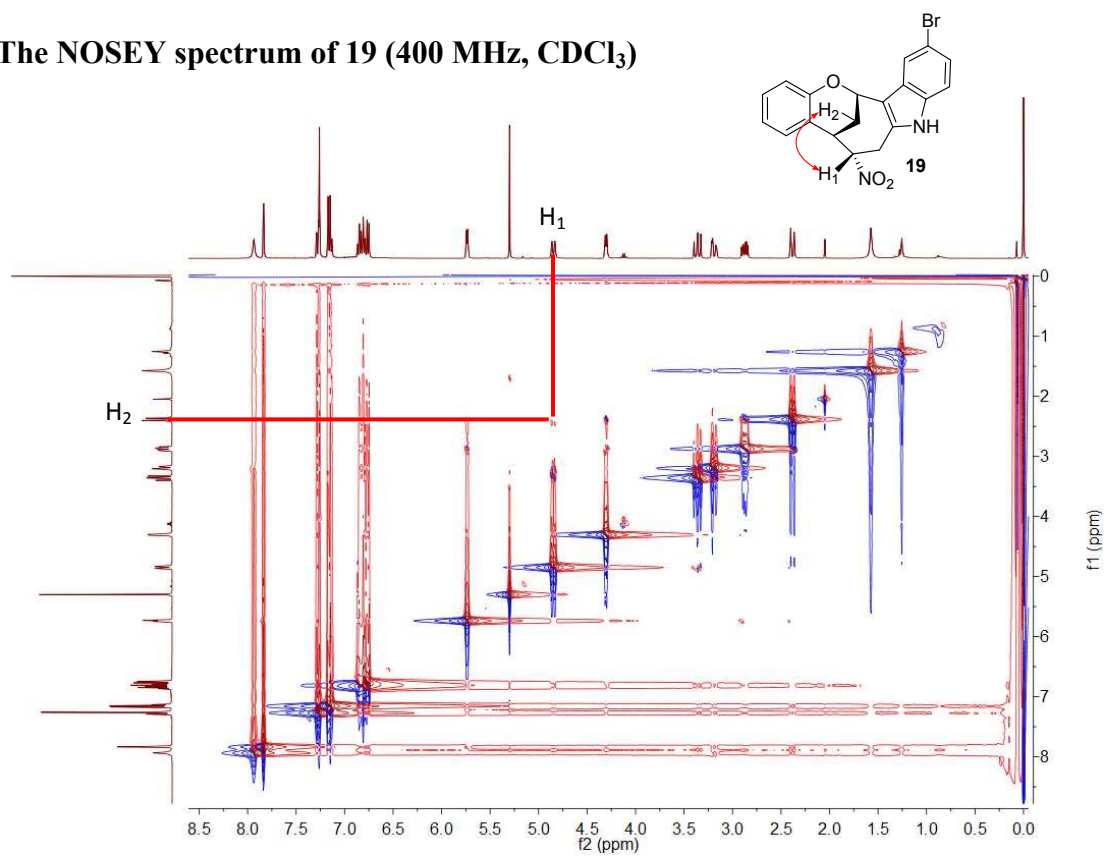

## The HPLC of racemic 19

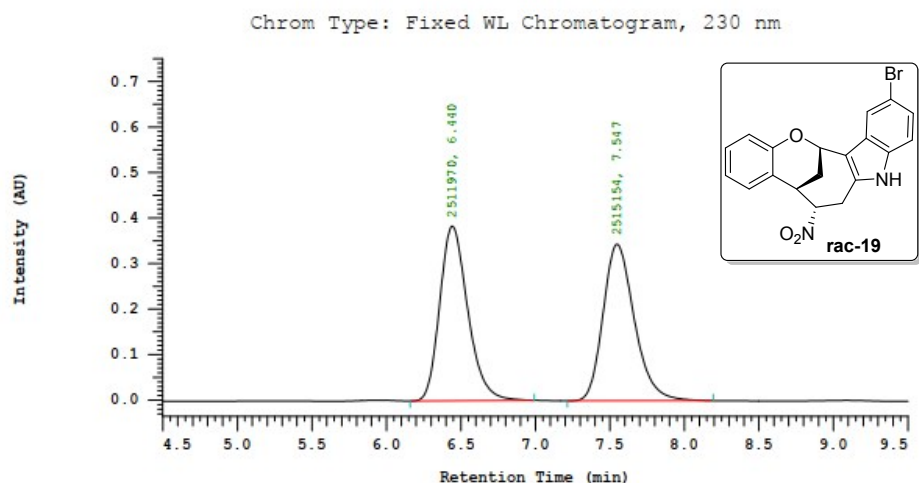

Chrom Type: Fixed WL Chromatogram, 230 nm  
 Peak Quantitation: AREA  
 Calculation Method: AREA%

| No. | RT    | Area    | Area %  | BC |
|-----|-------|---------|---------|----|
| 1   | 6.440 | 2511970 | 49.968  | BB |
| 2   | 7.547 | 2515154 | 50.032  | BB |
|     |       | 5027124 | 100.000 |    |

## The HPLC of chiral 19

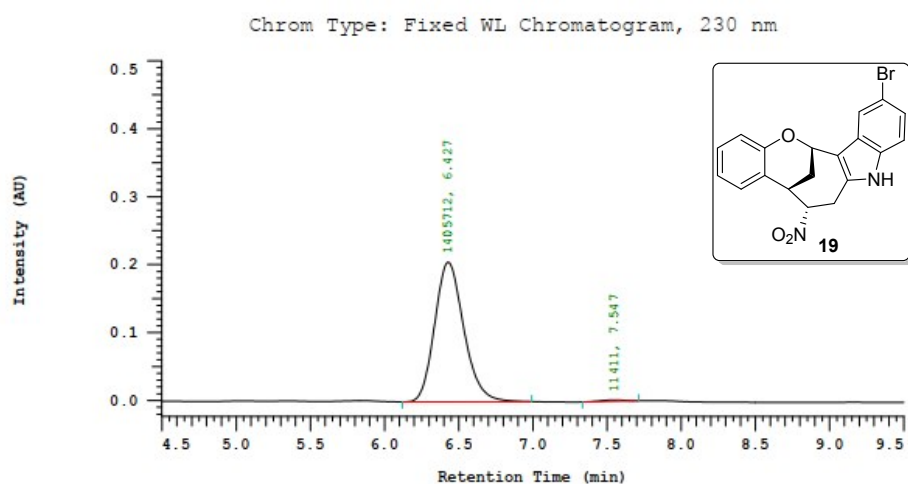

Chrom Type: Fixed WL Chromatogram, 230 nm  
 Peak Quantitation: AREA  
 Calculation Method: AREA%

| No. | RT    | Area    | Area %  | BC |
|-----|-------|---------|---------|----|
| 1   | 6.427 | 1405712 | 99.195  | BB |
| 2   | 7.547 | 11411   | 0.805   | BB |
|     |       | 1417123 | 100.000 |    |

### The $^1\text{H}$ NMR spectrum of 20 (400 MHz, $\text{CDCl}_3$ )

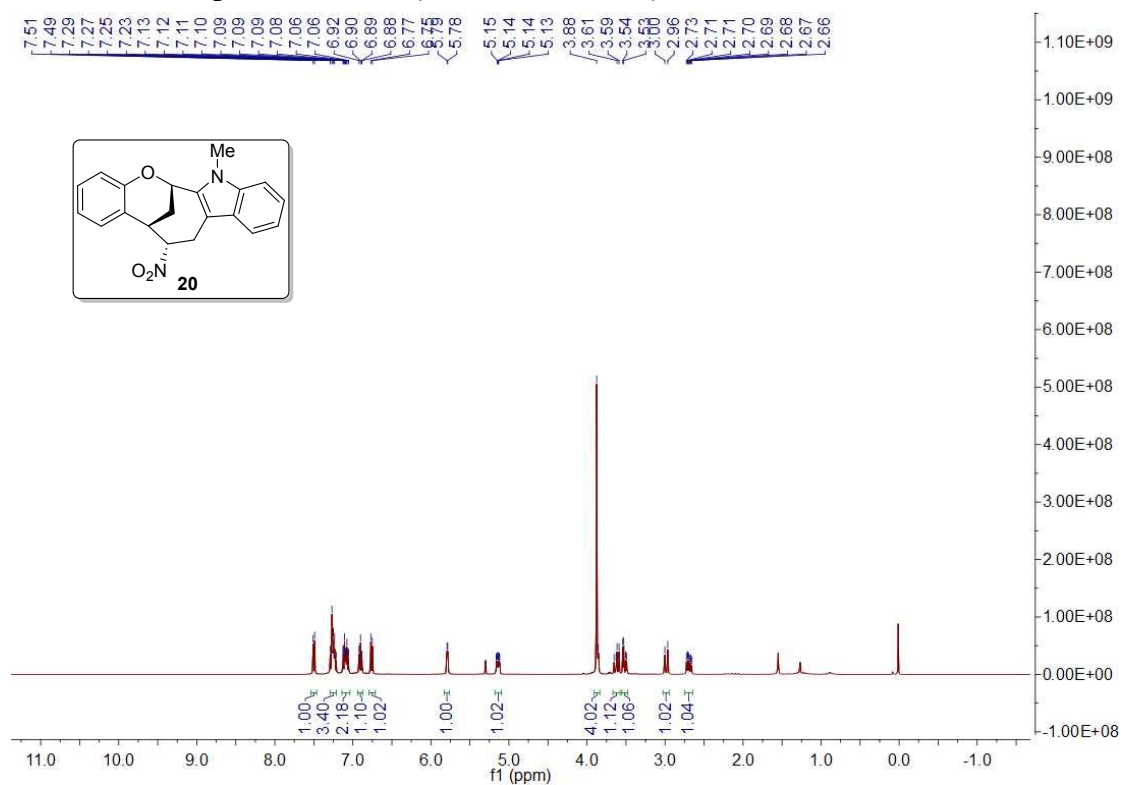

### The $^{13}\text{C}$ NMR spectrum of 20 (101 MHz, $\text{CDCl}_3$ )

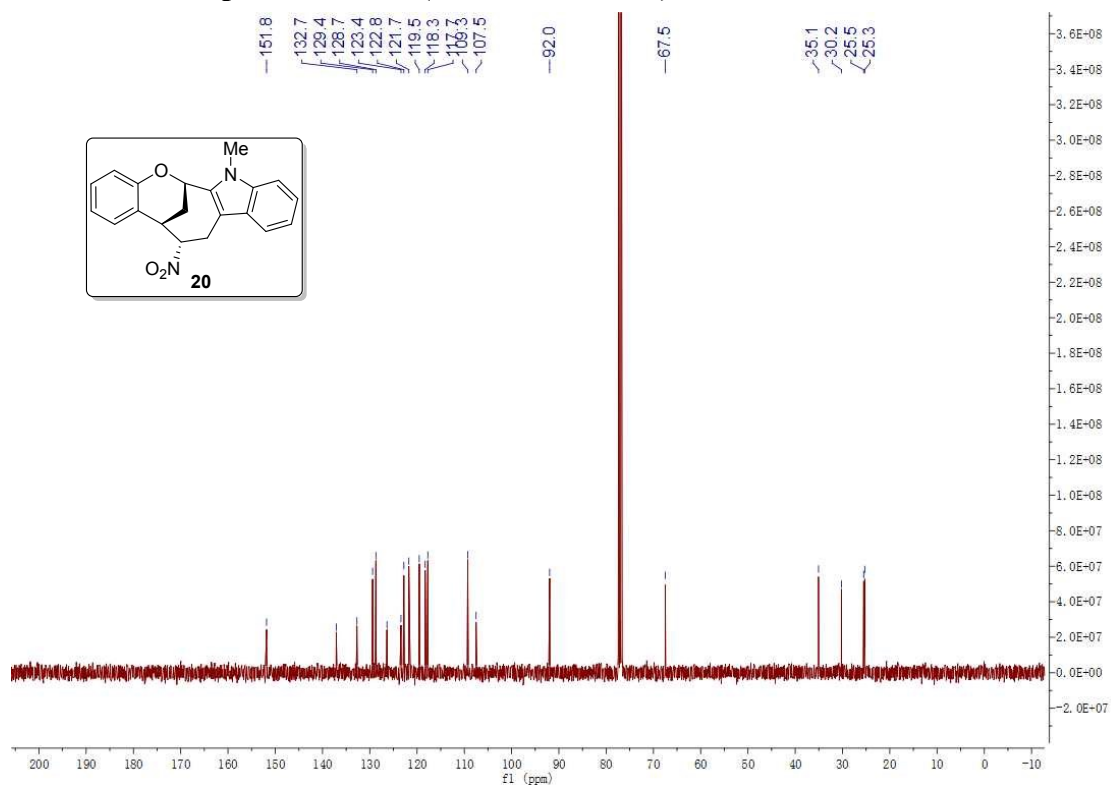



The NOSEY spectrum of **20** (500 MHz, CDCl<sub>3</sub>)

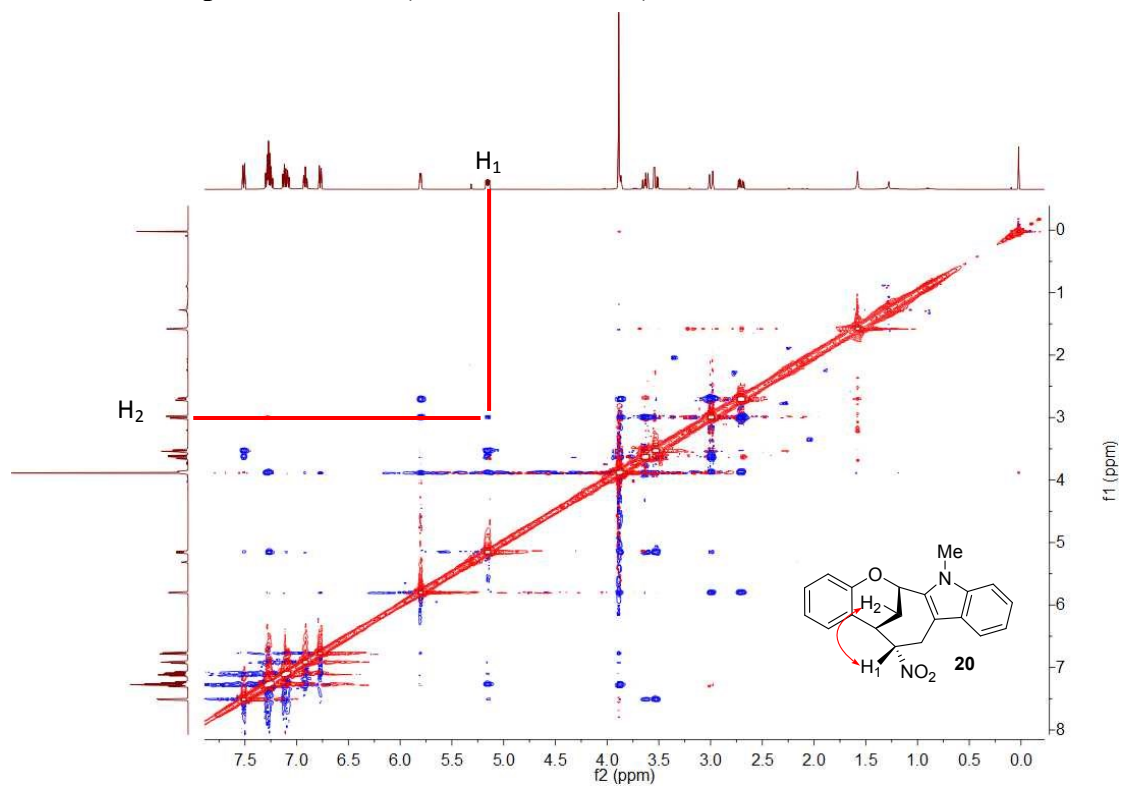

## The HPLC of racemic 20

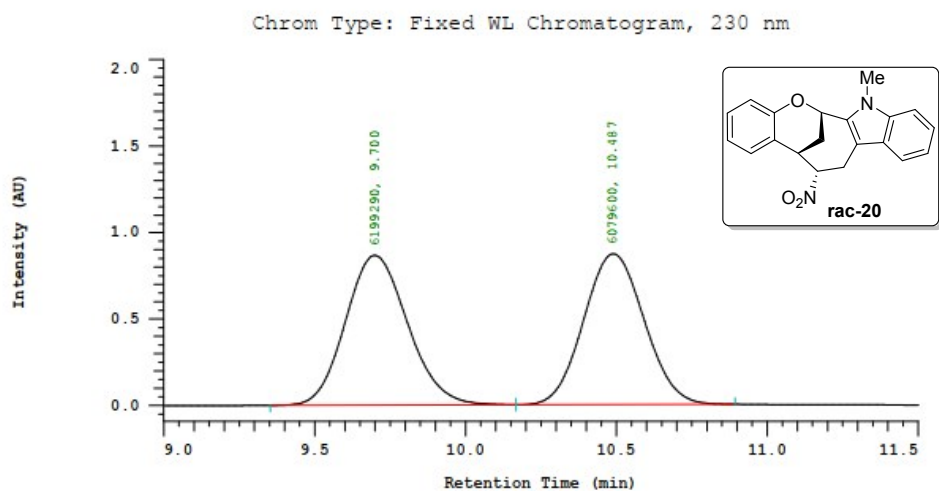

Chrom Type: Fixed WL Chromatogram, 230 nm

Peak Quantitation: AREA

Calculation Method: AREA%

| No. | RT     | Area     | Area %  | BC |
|-----|--------|----------|---------|----|
| 1   | 9.700  | 6199290  | 50.487  | BV |
| 2   | 10.487 | 6079600  | 49.513  | VB |
|     |        | 12278890 | 100.000 |    |

## The HPLC of chiral 20

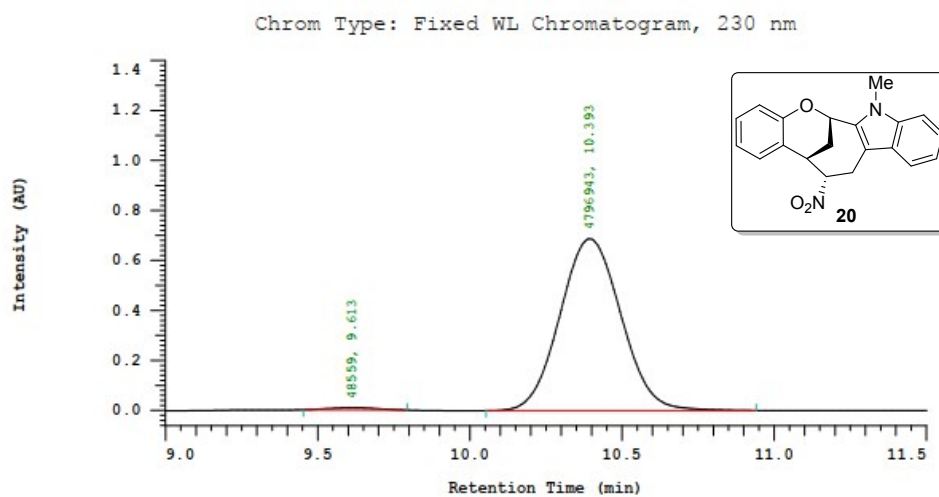

Chrom Type: Fixed WL Chromatogram, 230 nm

Peak Quantitation: AREA

Calculation Method: AREA%

| No. | RT     | Area    | Area %  | BC |
|-----|--------|---------|---------|----|
| 1   | 9.613  | 48559   | 1.002   | BB |
| 2   | 10.393 | 4796943 | 98.998  | BB |
|     |        | 4845502 | 100.000 |    |

The  $^1\text{H}$  NMR spectrum of 22 (600 MHz,  $\text{CDCl}_3$ )

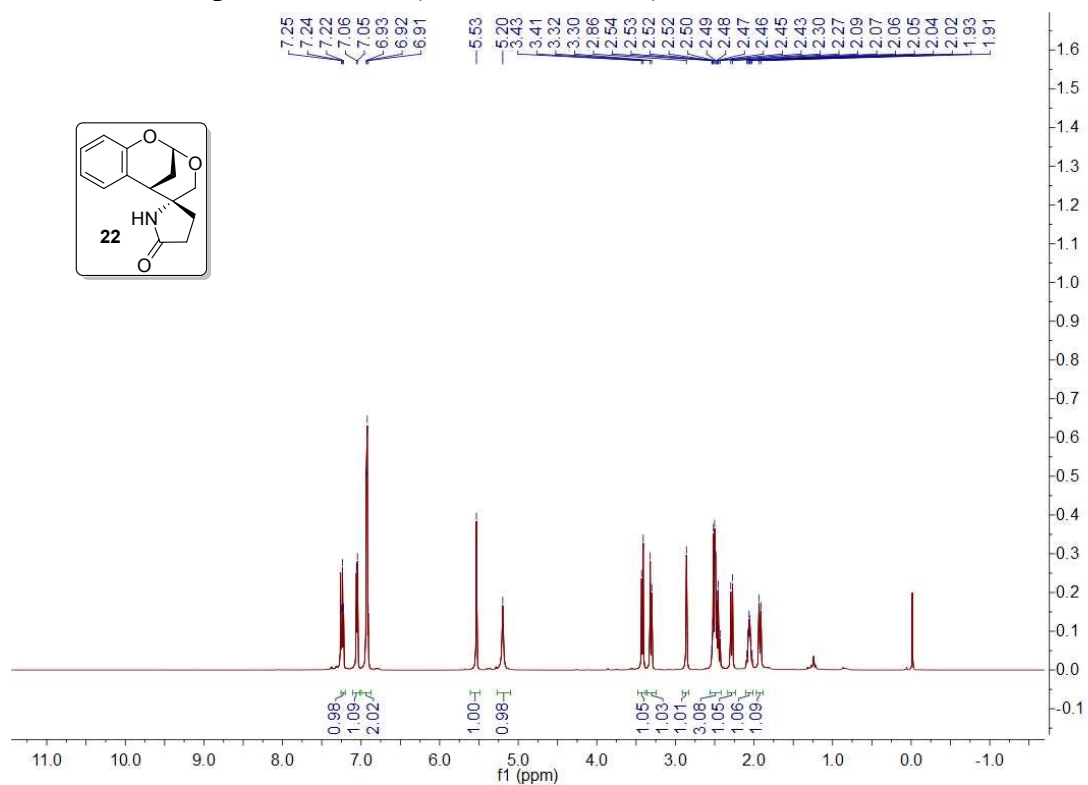

The  $^{13}\text{C}$  NMR spectrum of 22 (151 MHz,  $\text{CDCl}_3$ )

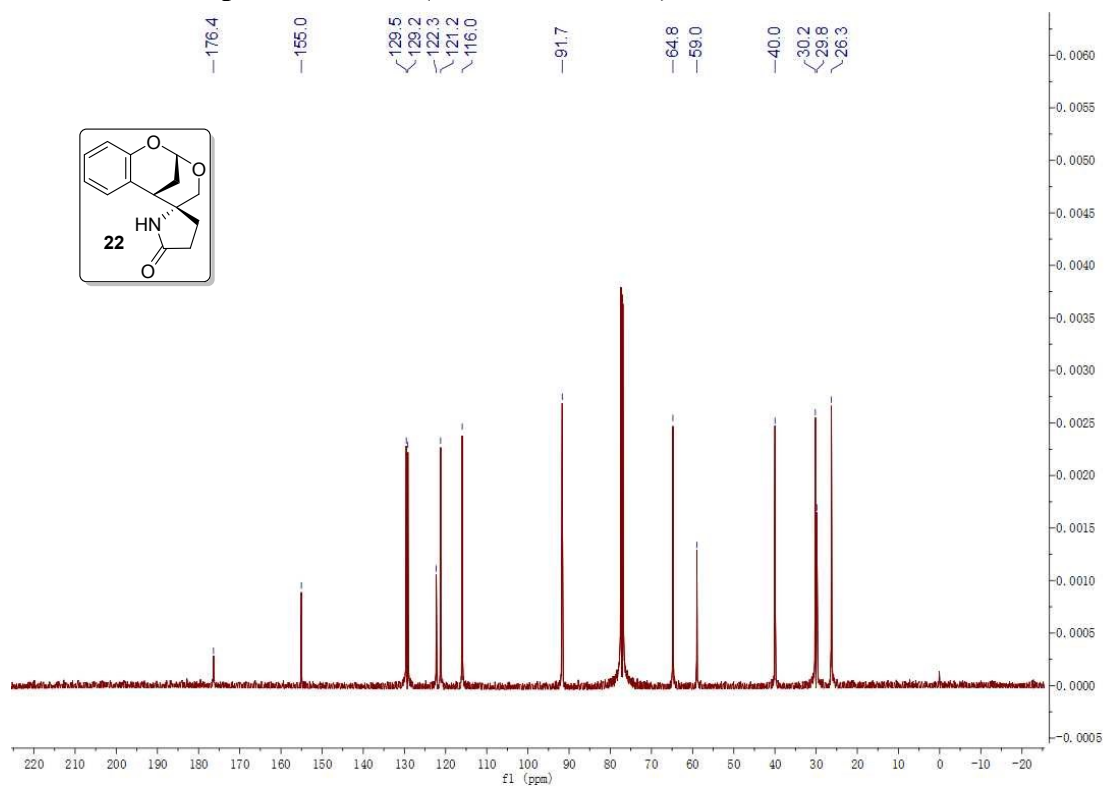

The  $^1\text{H}$ - $^1\text{H}$  COSY spectrum of 22 (500 MHz,  $\text{CDCl}_3$ )

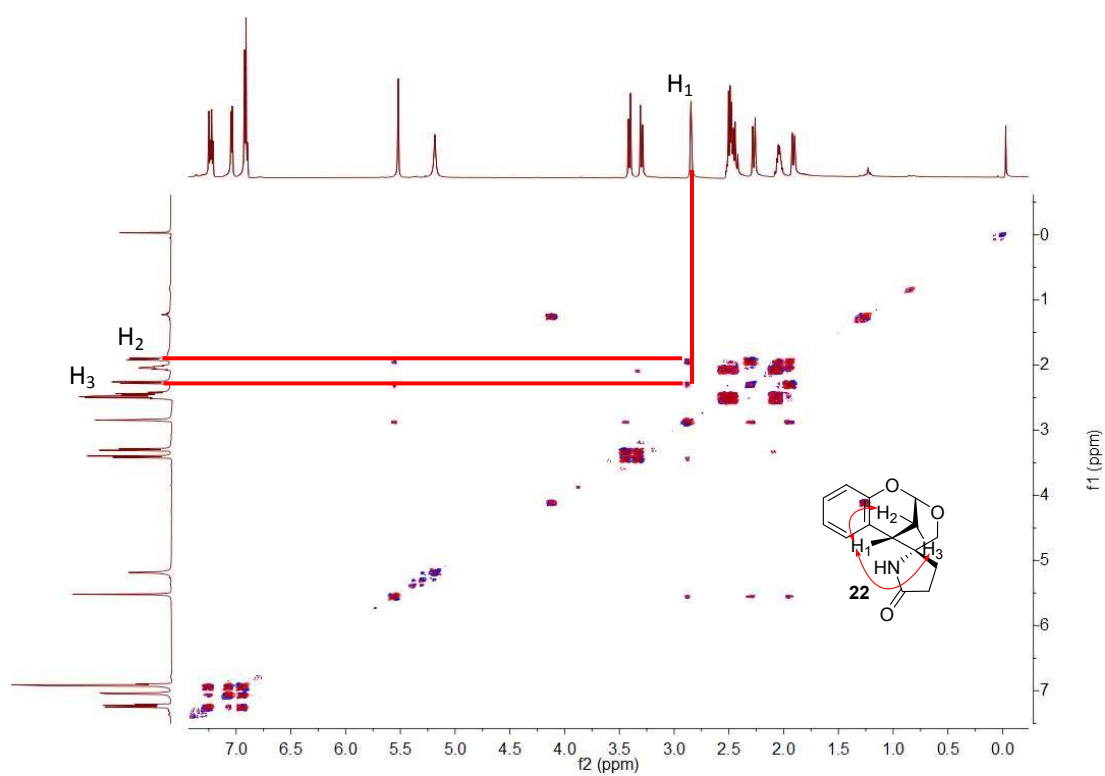

The NOESY spectrum of 22 (400 MHz,  $\text{CDCl}_3$ )

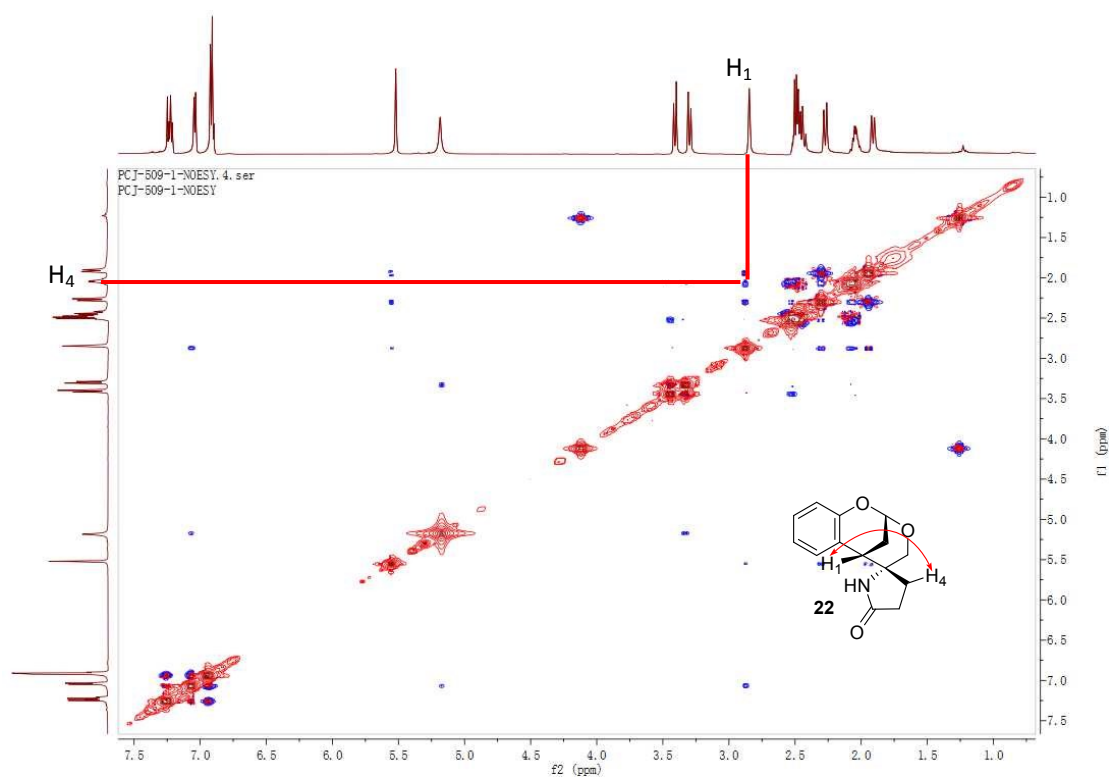

## The HPLC of racemic 22

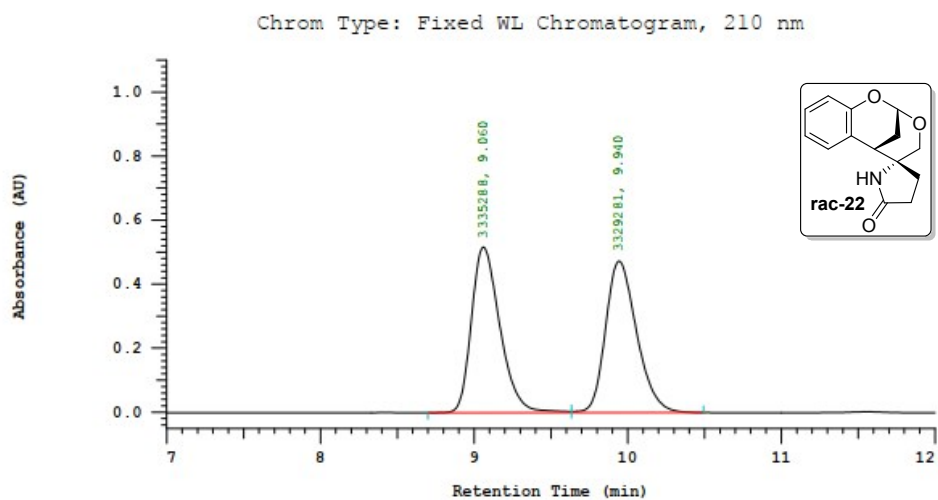

Chrom Type: Fixed WL Chromatogram, 210 nm  
 Peak Quantitation: AREA  
 Calculation Method: AREA%

| No. | RT    | Area    | Area %  | BC |
|-----|-------|---------|---------|----|
| 1   | 9.060 | 3335288 | 50.045  | BV |
| 2   | 9.940 | 3329281 | 49.955  | VB |
|     |       | 6664569 | 100.000 |    |

## The HPLC of chiral 22

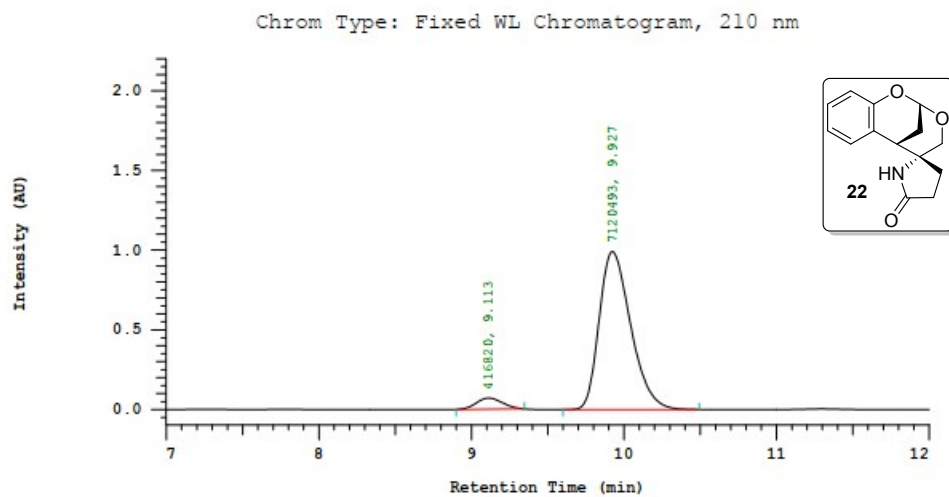

Chrom Type: Fixed WL Chromatogram, 210 nm  
 Peak Quantitation: AREA  
 Calculation Method: AREA%

| No. | RT    | Area    | Area %  | BC |
|-----|-------|---------|---------|----|
| 1   | 9.113 | 416820  | 5.530   | BB |
| 2   | 9.927 | 7120493 | 94.470  | BB |
|     |       | 7537313 | 100.000 |    |

### The $^1\text{H}$ NMR spectrum of 23 (400 MHz, $\text{CDCl}_3$ )

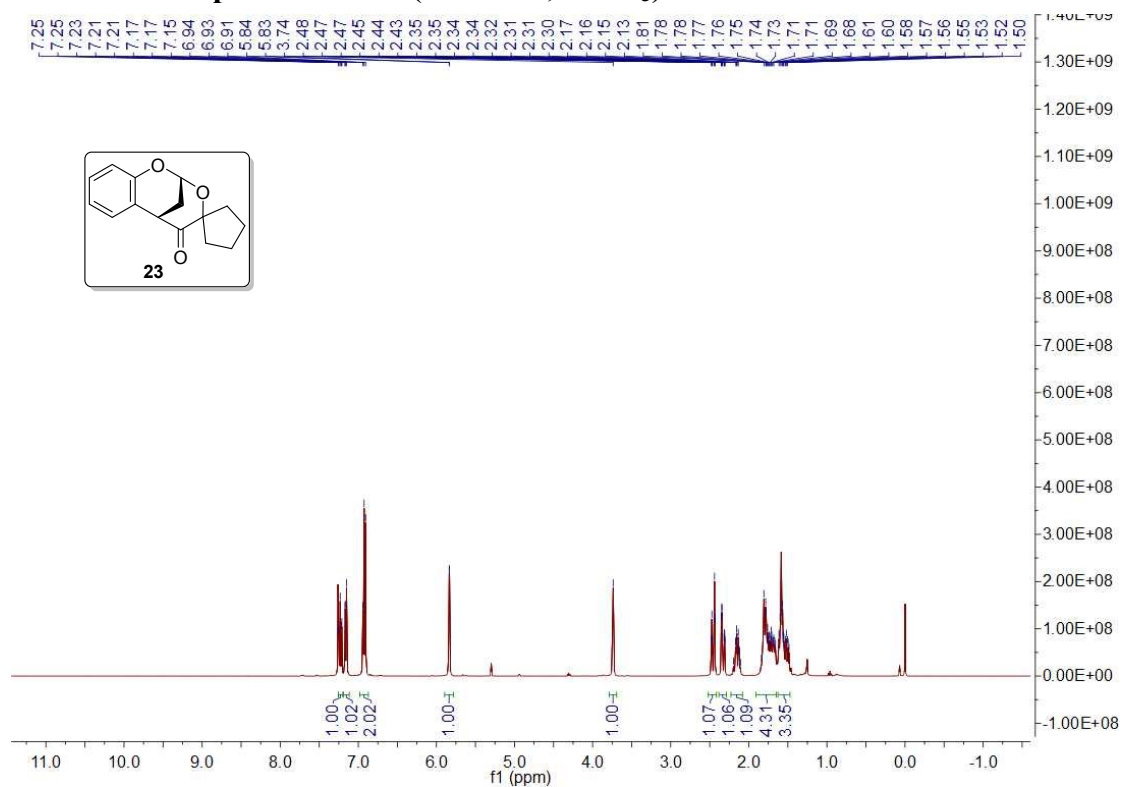

### The $^{13}\text{C}$ NMR spectrum of 23 (101 MHz, $\text{CDCl}_3$ )

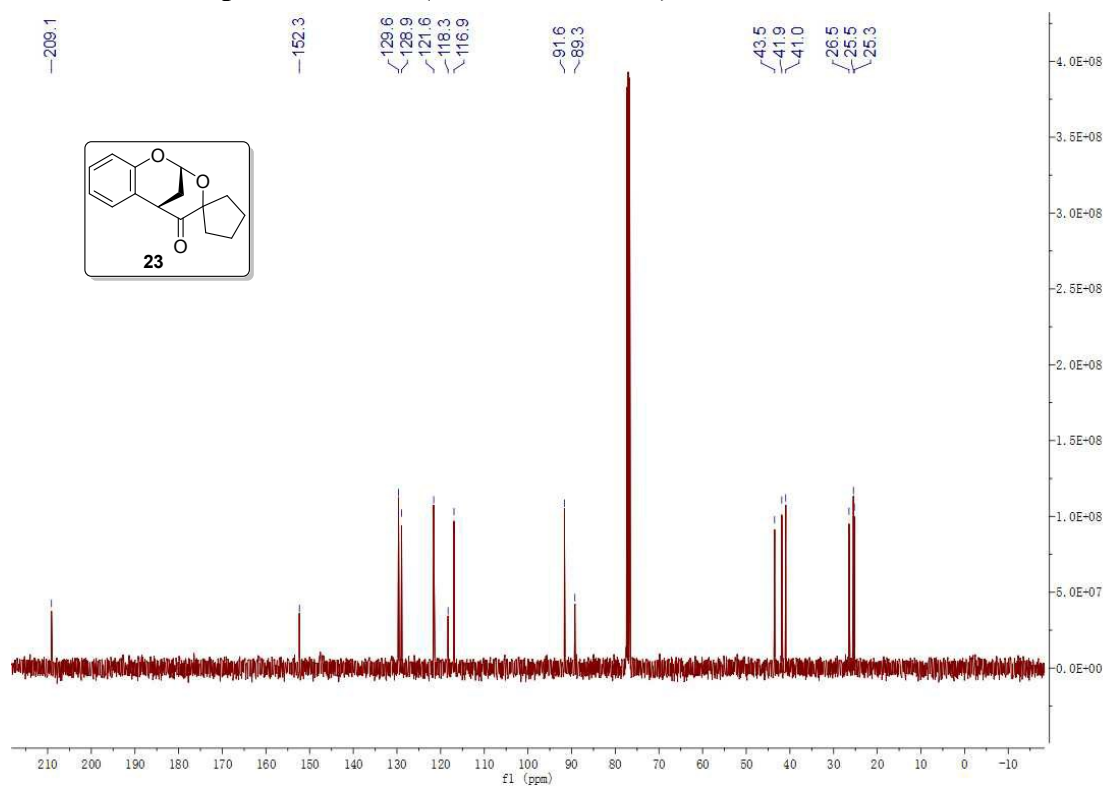

## The HPLC of racemic 23

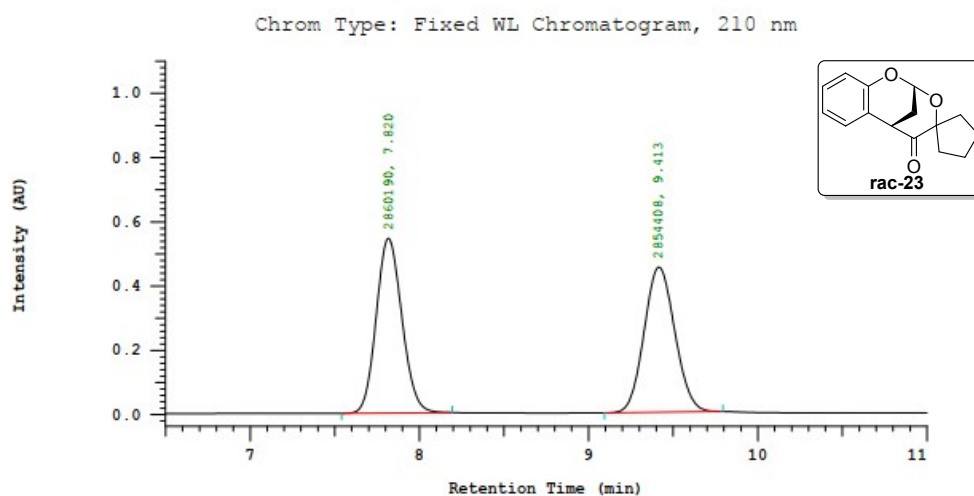

Chrom Type: Fixed WL Chromatogram, 210 nm  
 Peak Quantitation: AREA  
 Calculation Method: AREA%

| No. | RT    | Area    | Area %  | BC |
|-----|-------|---------|---------|----|
| 1   | 7.820 | 2860190 | 50.051  | BB |
| 2   | 9.413 | 2854408 | 49.949  | BB |
|     |       | 5714598 | 100.000 |    |

## The HPLC of chiral 23

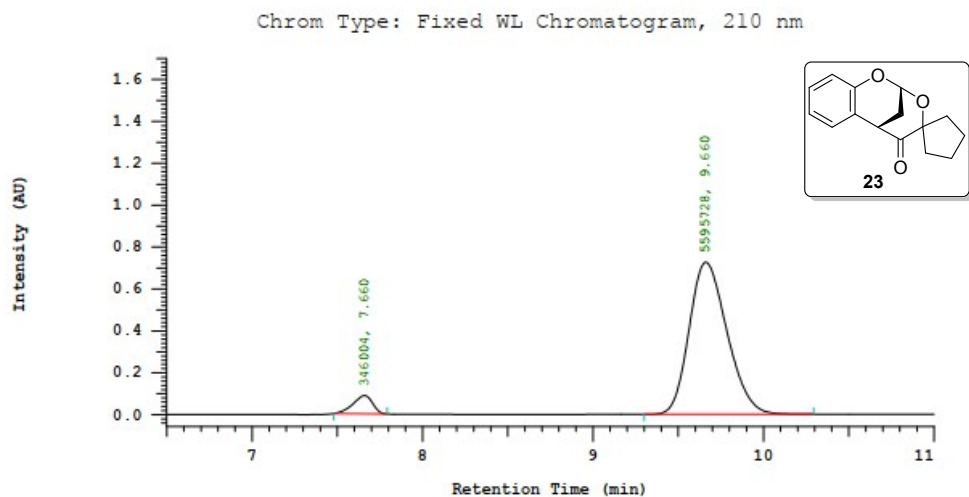

Chrom Type: Fixed WL Chromatogram, 210 nm  
 Peak Quantitation: AREA  
 Calculation Method: AREA%

| No. | RT    | Area    | Area %  | BC |
|-----|-------|---------|---------|----|
| 1   | 7.660 | 346004  | 5.823   | BB |
| 2   | 9.660 | 5595728 | 94.177  | BB |
|     |       | 5941732 | 100.000 |    |

### The $^1\text{H}$ NMR spectrum of 24 (400 MHz, $\text{CDCl}_3$ )

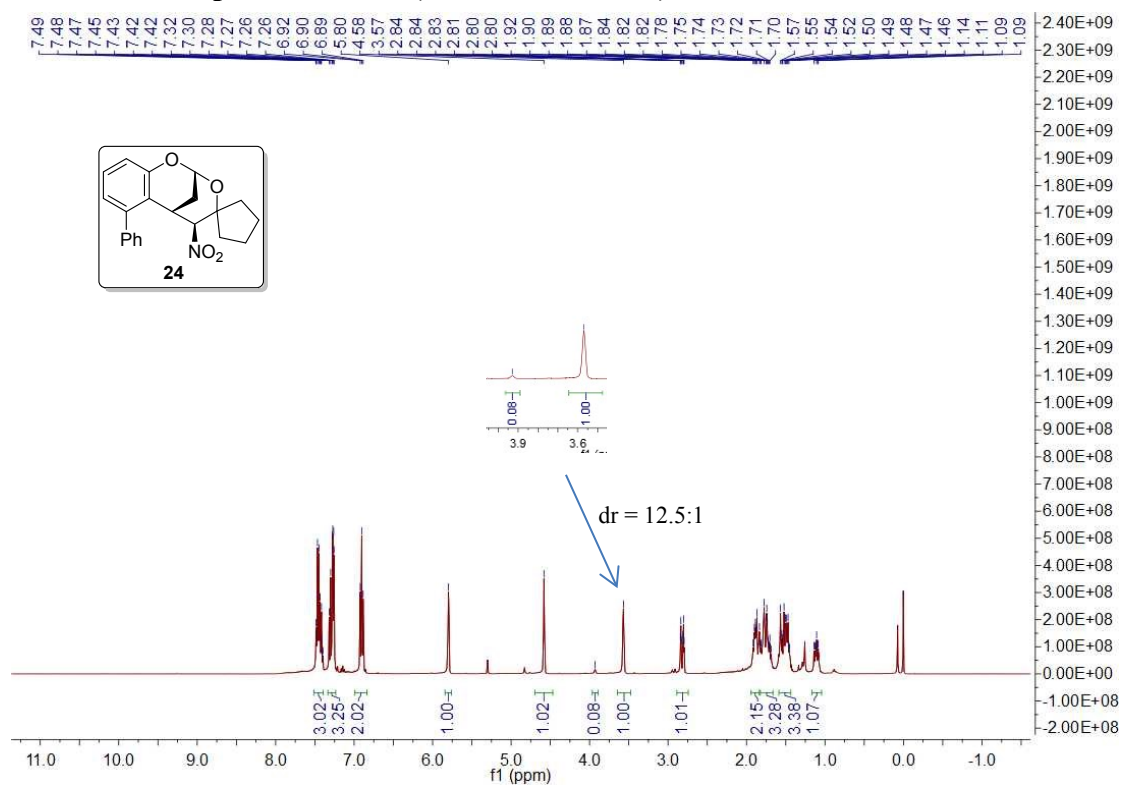

### The $^{13}\text{C}$ NMR spectrum of 24 (101 MHz, $\text{CDCl}_3$ )

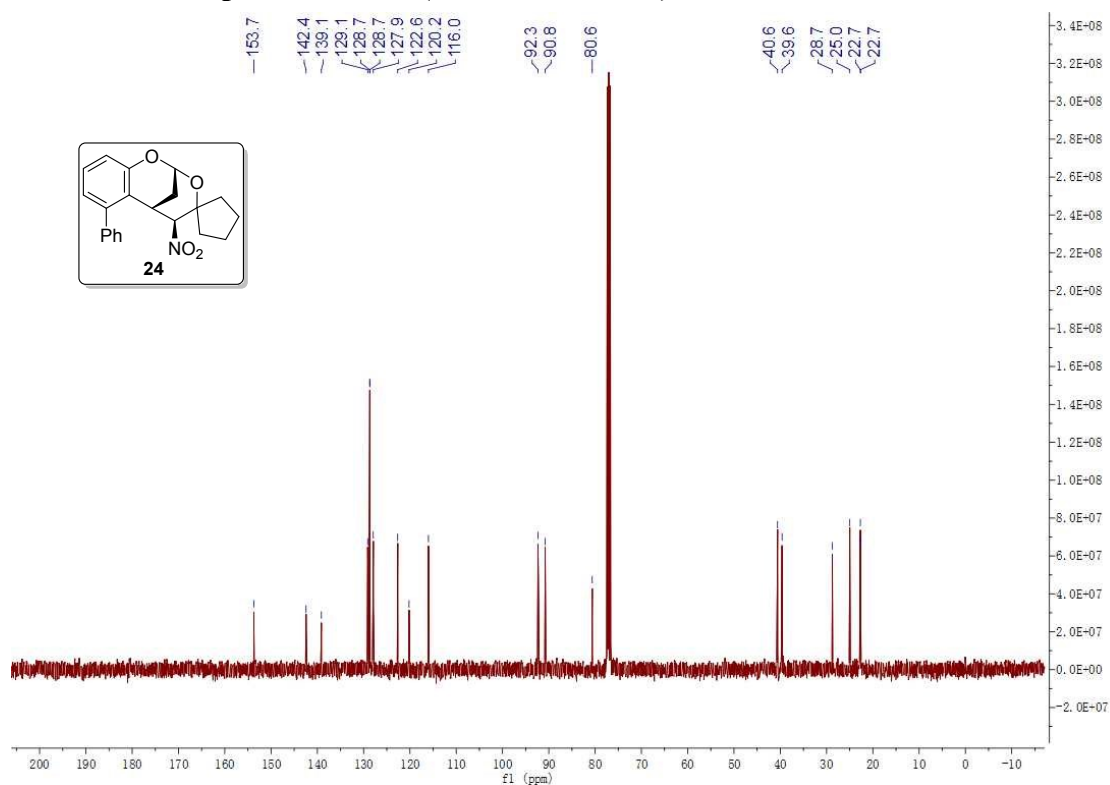



## The HPLC of racemic 24

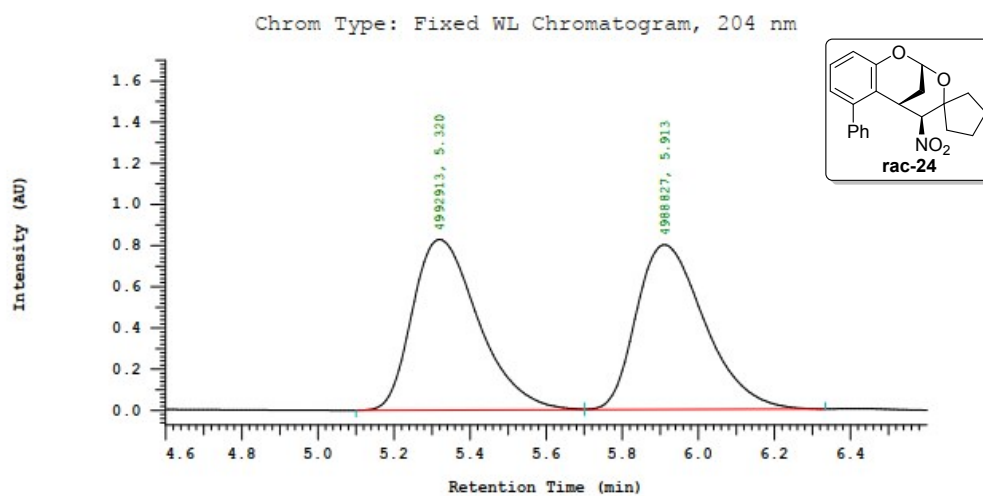

Chrom Type: Fixed WL Chromatogram, 204 nm  
 Peak Quantitation: AREA  
 Calculation Method: AREA%

| No. | RT    | Area    | Area %  | BC |
|-----|-------|---------|---------|----|
| 1   | 5.320 | 4992913 | 50.020  | BV |
| 2   | 5.913 | 4988827 | 49.980  | VB |
|     |       | 9981740 | 100.000 |    |

## The HPLC of chiral 24

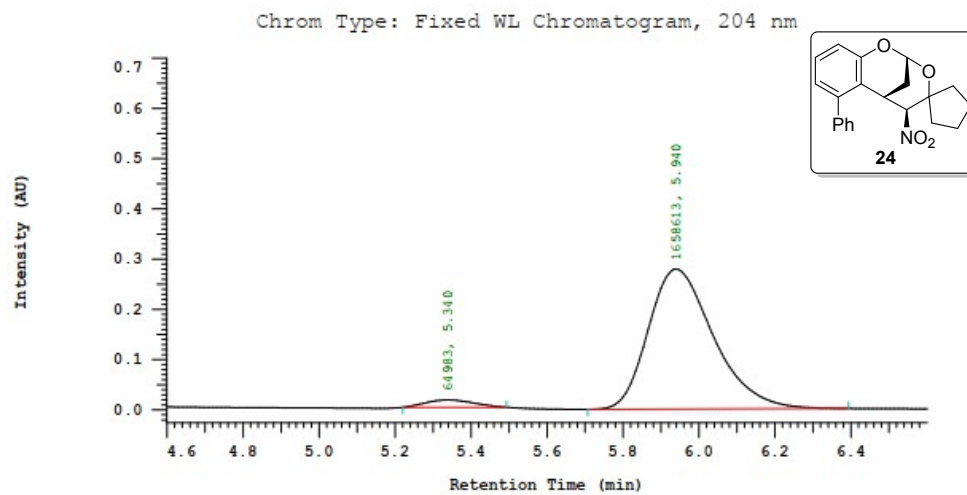

Chrom Type: Fixed WL Chromatogram, 204 nm  
 Peak Quantitation: AREA  
 Calculation Method: AREA%

| No. | RT    | Area    | Area %  | BC |
|-----|-------|---------|---------|----|
| 1   | 5.340 | 64983   | 3.770   | BB |
| 2   | 5.940 | 1658613 | 96.230  | BB |
|     |       | 1723596 | 100.000 |    |

### The $^1\text{H}$ NMR spectrum of 25 (400 MHz, $\text{CDCl}_3$ )

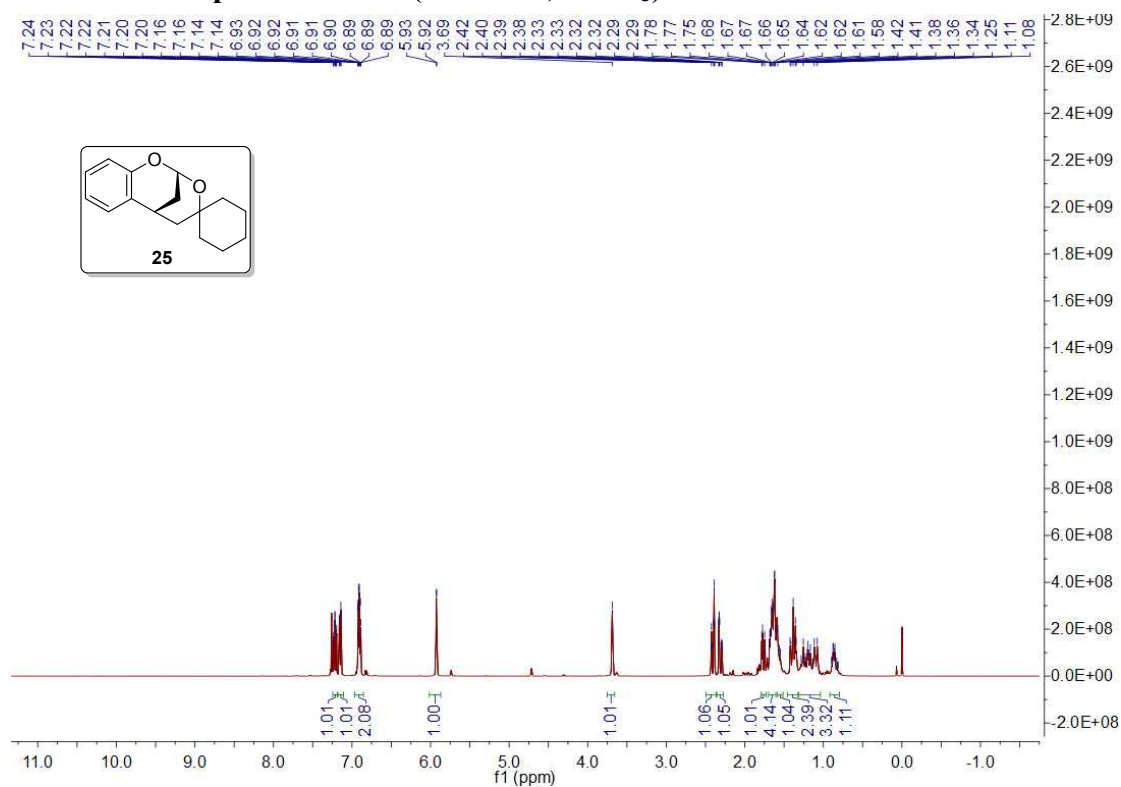

### The $^{13}\text{C}$ NMR spectrum of 25 (101 MHz, $\text{CDCl}_3$ )

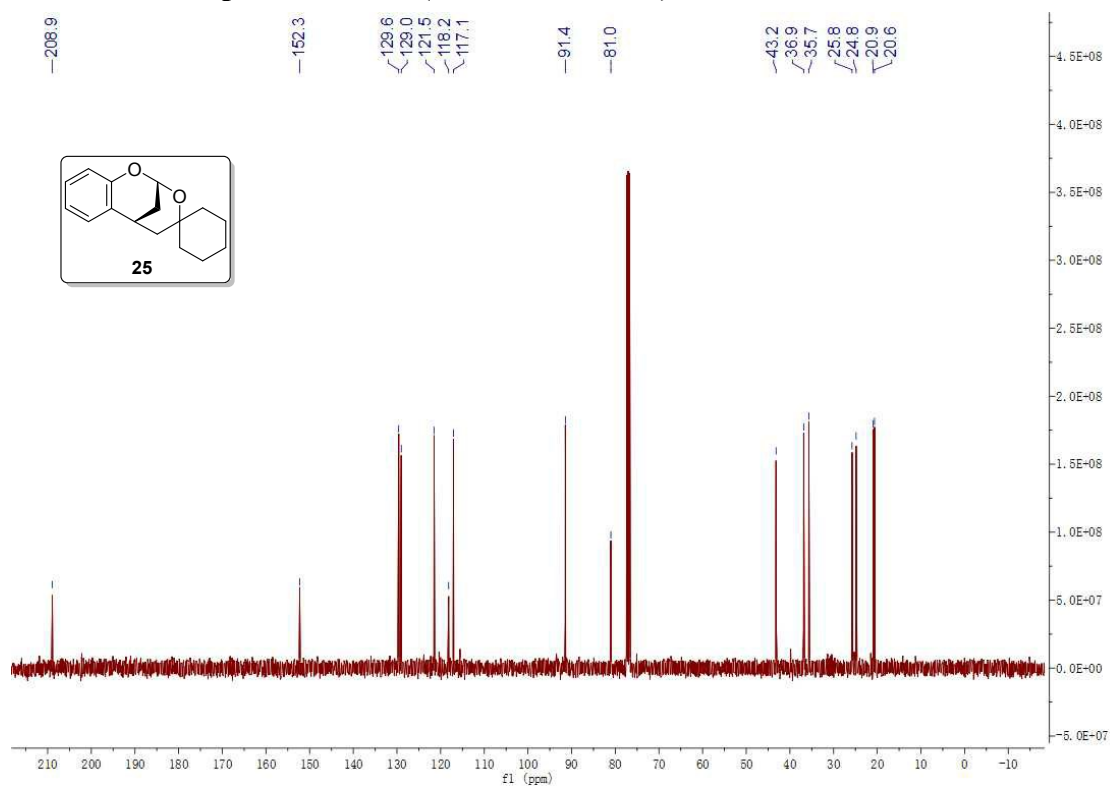

## The HPLC of racemic 25

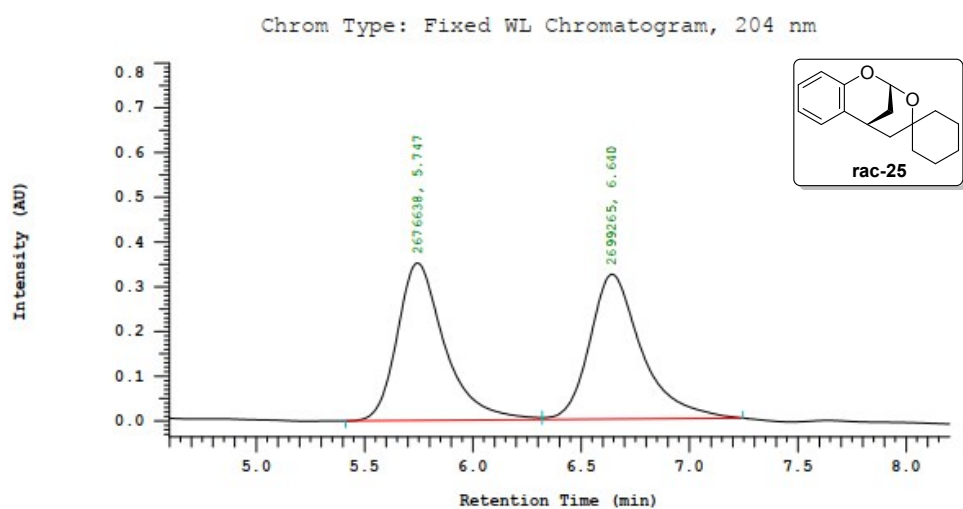

Chrom Type: Fixed WL Chromatogram, 204 nm  
 Peak Quantitation: AREA  
 Calculation Method: AREA%

| No. | RT    | Area    | Area %  | BC |
|-----|-------|---------|---------|----|
| 1   | 5.747 | 2676638 | 49.790  | BV |
| 2   | 6.640 | 2699265 | 50.210  | VB |
|     |       | 5375903 | 100.000 |    |

## The HPLC of chiral 25

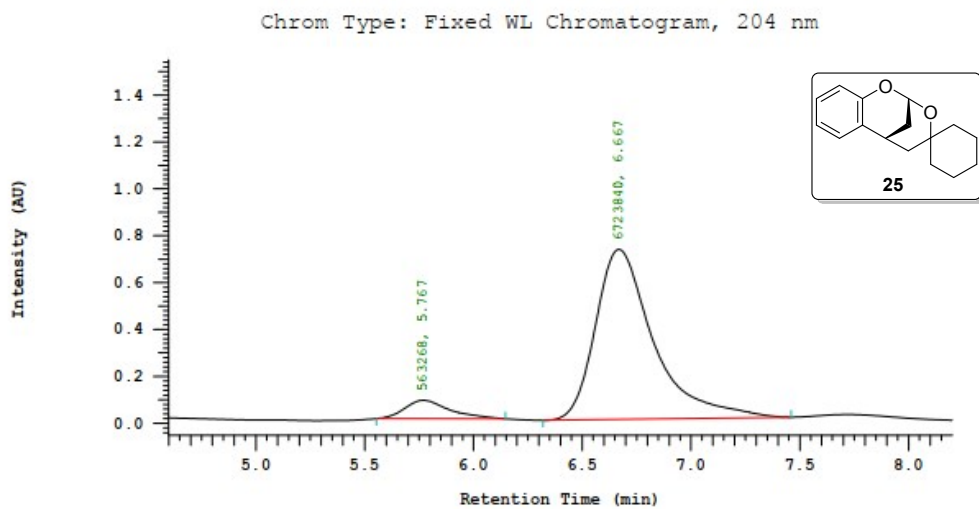

Chrom Type: Fixed WL Chromatogram, 204 nm  
 Peak Quantitation: AREA  
 Calculation Method: AREA%

| No. | RT    | Area    | Area %  | BC |
|-----|-------|---------|---------|----|
| 1   | 5.767 | 563268  | 7.730   | BB |
| 2   | 6.667 | 6723840 | 92.270  | BB |
|     |       | 7287108 | 100.000 |    |

The  $^1\text{H}$  NMR spectrum of 26 (400 MHz,  $\text{CDCl}_3$ )

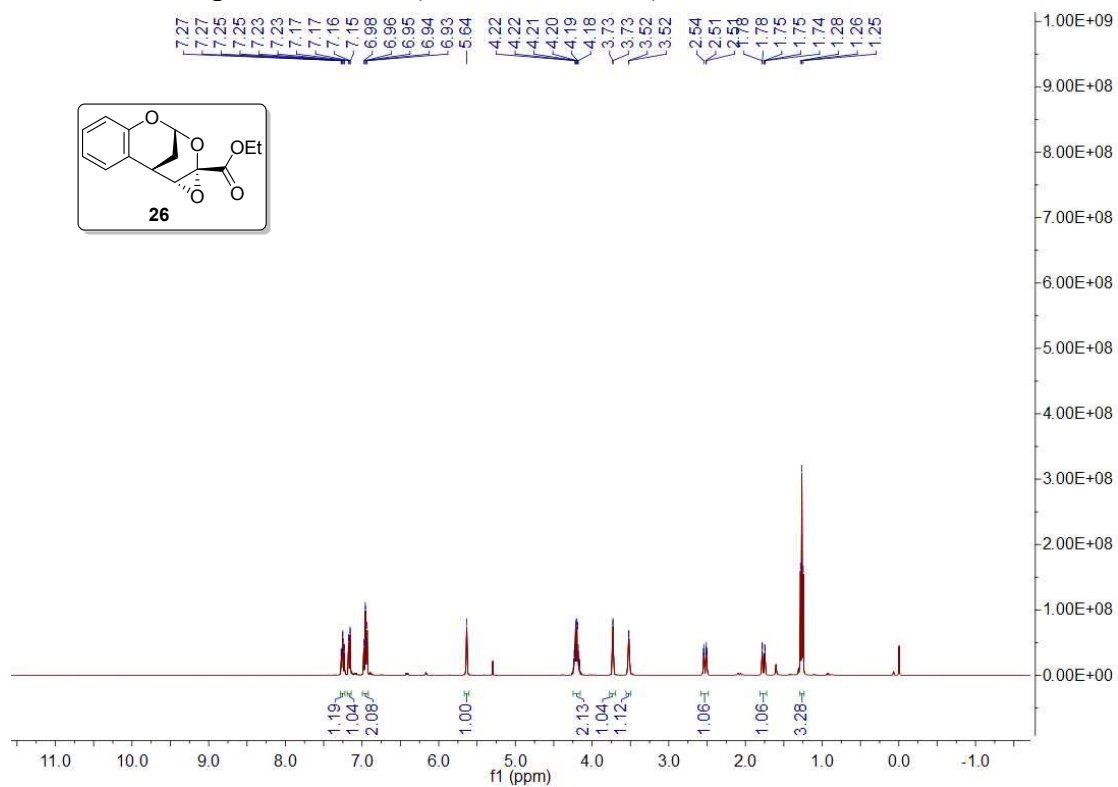

The  $^{13}\text{C}$  NMR spectrum of 26 (101 MHz,  $\text{CDCl}_3$ )

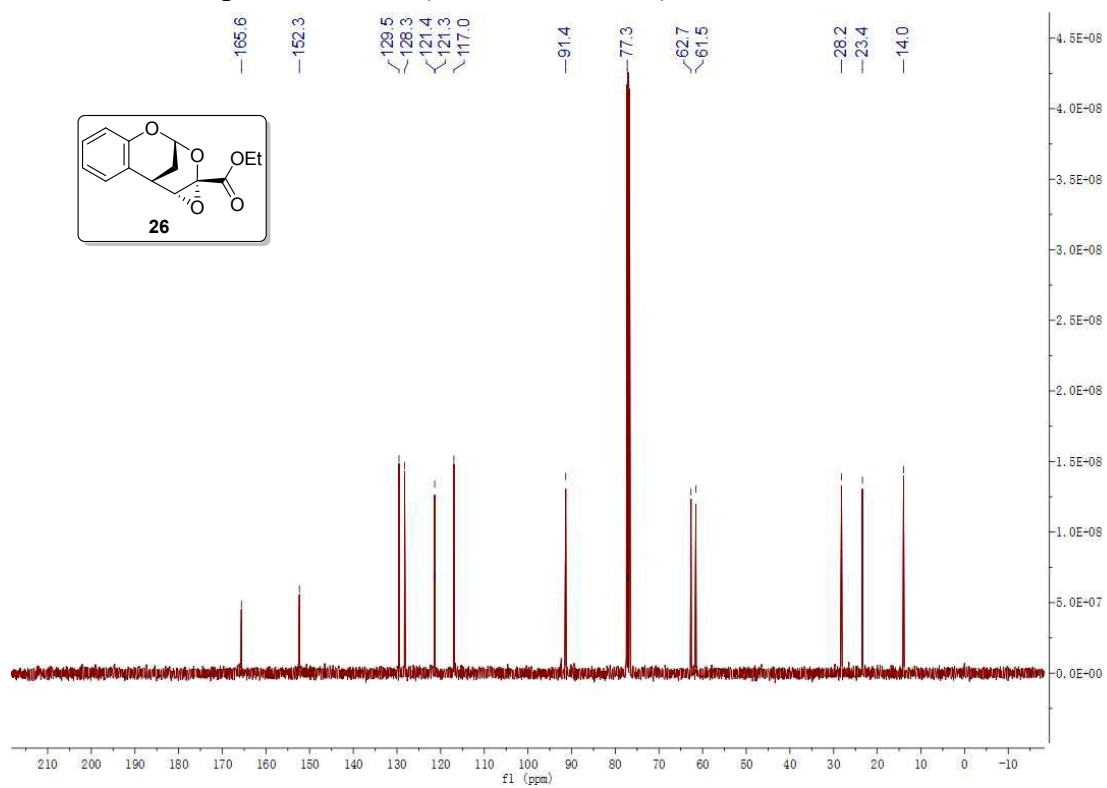

The NOSEY spectrum of 26 (400 MHz, CDCl<sub>3</sub>)

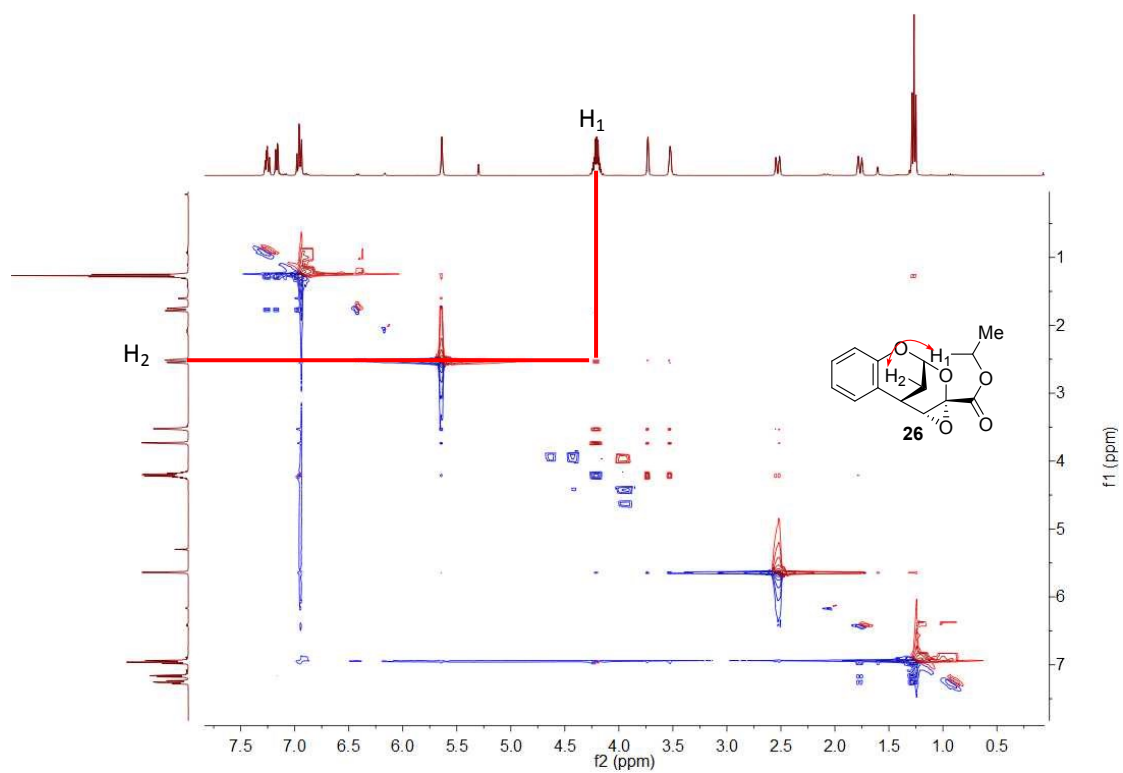

## The HPLC of racemic 26

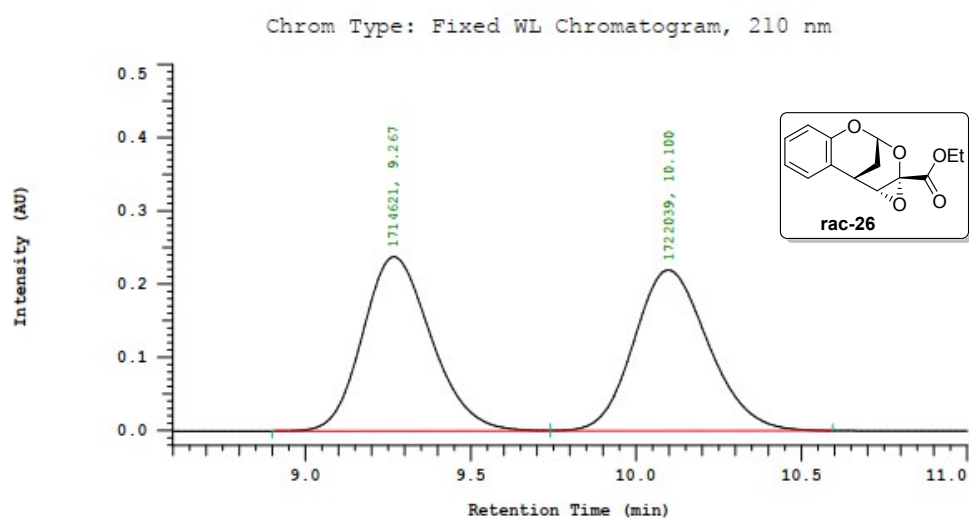

Chrom Type: Fixed WL Chromatogram, 210 nm  
 Peak Quantitation: AREA  
 Calculation Method: AREA%

| No. | RT     | Area    | Area %  | BC |
|-----|--------|---------|---------|----|
| 1   | 9.267  | 1714621 | 49.892  | BV |
| 2   | 10.100 | 1722039 | 50.108  | VB |
|     |        | 3436660 | 100.000 |    |

## The HPLC of chiral 26

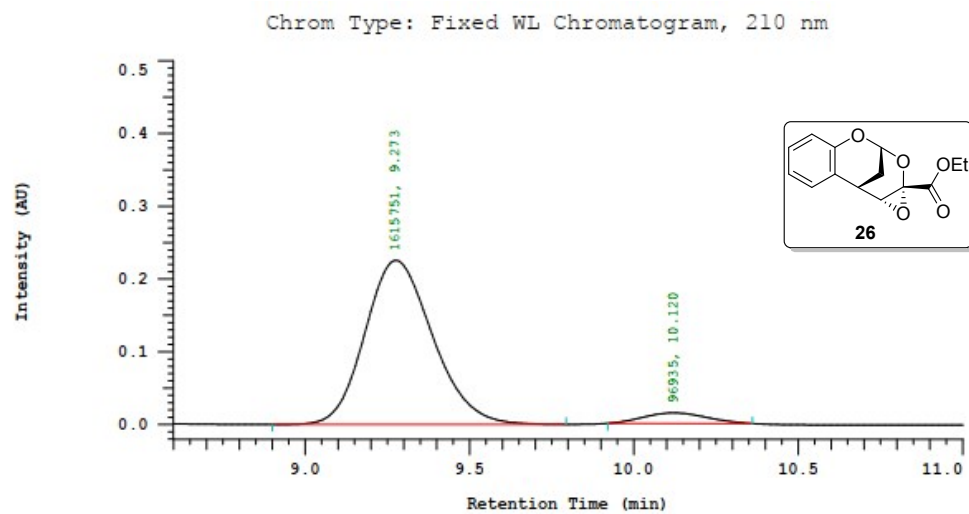

Chrom Type: Fixed WL Chromatogram, 210 nm  
 Peak Quantitation: AREA  
 Calculation Method: AREA%

| No. | RT     | Area    | Area %  | BC |
|-----|--------|---------|---------|----|
| 1   | 9.273  | 1615751 | 94.340  | BB |
| 2   | 10.120 | 96935   | 5.660   | BB |
|     |        | 1712686 | 100.000 |    |

### The $^1\text{H}$ NMR spectrum of 27 (500 MHz, $\text{CDCl}_3$ )

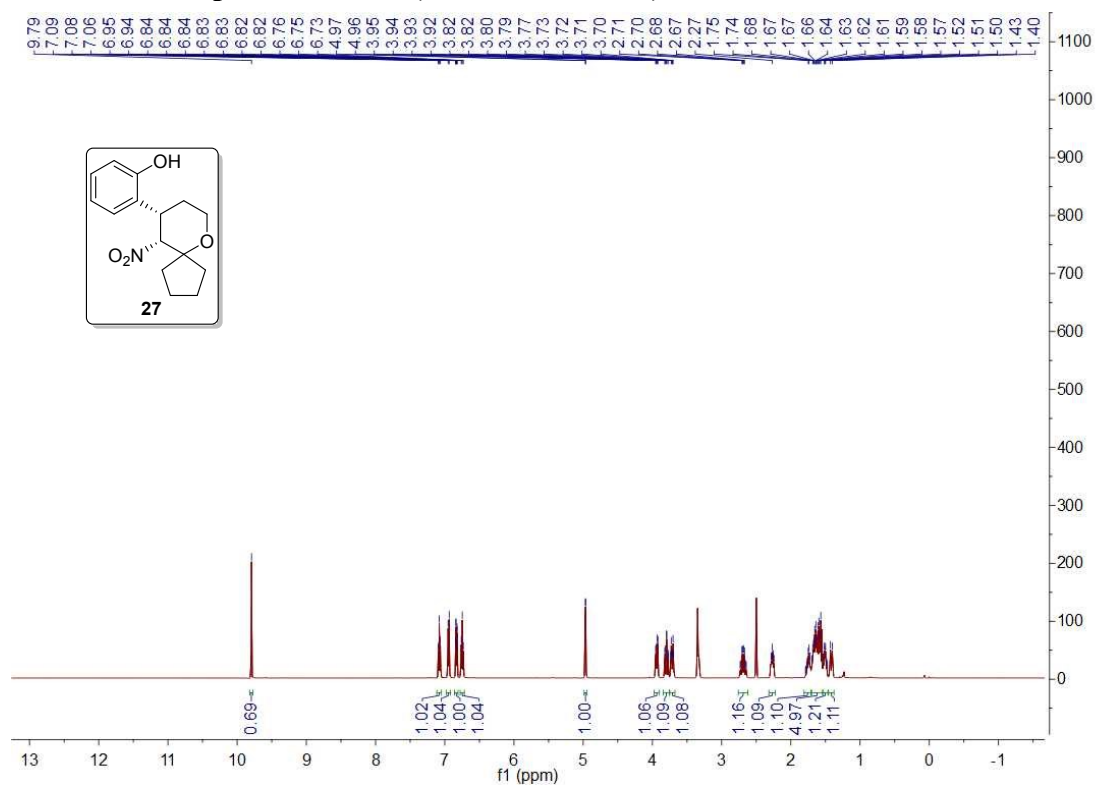

### The $^{13}\text{C}$ NMR spectrum of 27 (125 MHz, $\text{CDCl}_3$ )

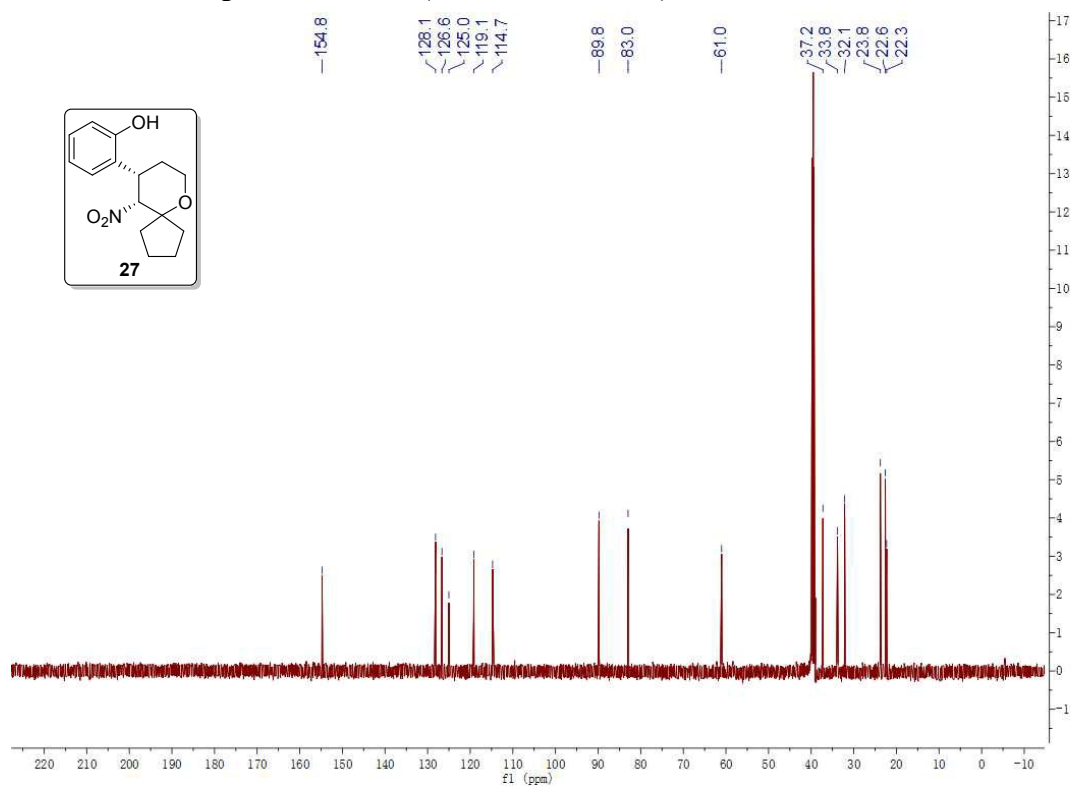

## The HPLC of racemic 27

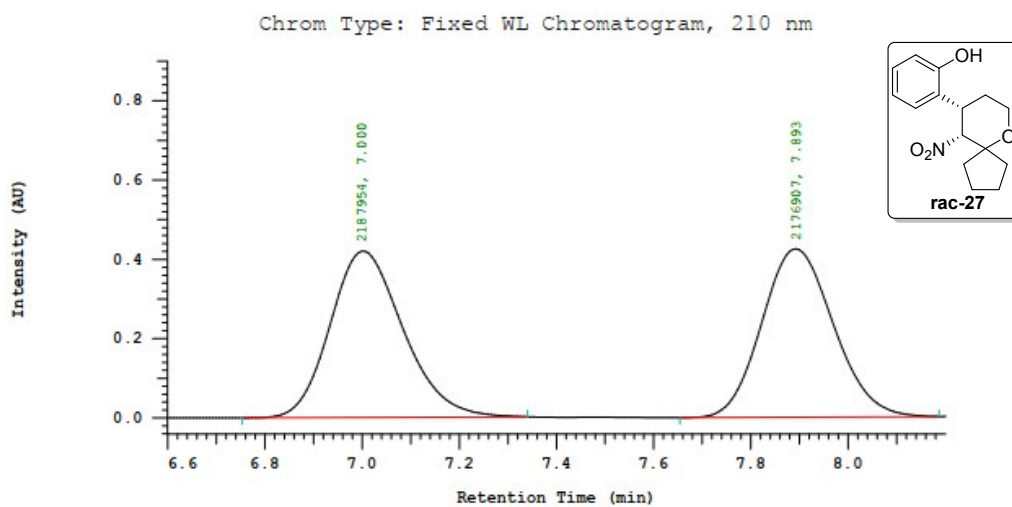

Chrom Type: Fixed WL Chromatogram, 210 nm  
 Peak Quantitation: AREA  
 Calculation Method: AREA%

| No. | RT    | Area    | Area %  | BC |
|-----|-------|---------|---------|----|
| 1   | 7.000 | 2187954 | 50.127  | BB |
| 2   | 7.893 | 2176907 | 49.873  | BB |
|     |       | 4364861 | 100.000 |    |

## The HPLC of chiral 27

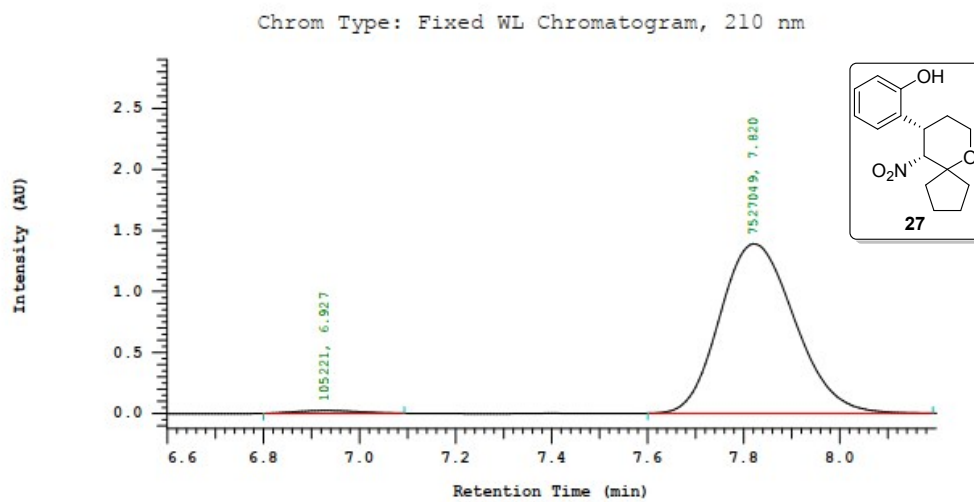

Chrom Type: Fixed WL Chromatogram, 210 nm  
 Peak Quantitation: AREA  
 Calculation Method: AREA%

| No. | RT    | Area    | Area %  | BC |
|-----|-------|---------|---------|----|
| 1   | 6.927 | 105221  | 1.379   | BB |
| 2   | 7.820 | 7527049 | 98.621  | BB |
|     |       | 7632270 | 100.000 |    |



## K. Single crystal X-Ray diffraction data

CCDC 2072646 contains the supplementary crystallographic data for this paper. These data can be obtained free of charge from The Cambridge Crystallographic Data Centre via [www.ccdc.cam.ac.uk/data\\_request/cif](http://www.ccdc.cam.ac.uk/data_request/cif).

Absolute configuration of **5k** - CCDC 2072646

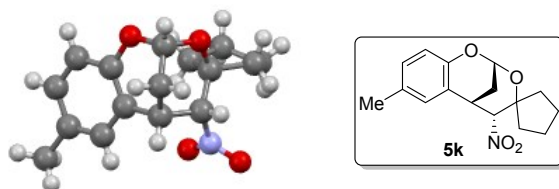

---

|                        |                                          |                                  |                           |
|------------------------|------------------------------------------|----------------------------------|---------------------------|
| Bond precision:        | C-C = 0.0052 Å                           | Wavelength=1.54184               |                           |
| Cell:                  | a=7.2163 (4)<br>alpha=90                 | b=10.5180 (4)<br>beta=90         | c=19.1890 (7)<br>gamma=90 |
| Temperature:           | 293 K                                    |                                  |                           |
|                        | Calculated                               | Reported                         |                           |
| Volume                 | 1456.47 (11)                             | 1456.47 (10)                     |                           |
| Space group            | P 21 21 21                               | P 21 21 21                       |                           |
| Hall group             | P 2ac 2ab                                | P 2ac 2ab                        |                           |
| Moiety formula         | C16 H19 N O4                             | ?                                |                           |
| Sum formula            | C16 H19 N O4                             | C16 H19 N O4                     |                           |
| Mr                     | 289.32                                   | 289.32                           |                           |
| Dx, g cm <sup>-3</sup> | 1.319                                    | 1.319                            |                           |
| Z                      | 4                                        | 4                                |                           |
| Mu (mm <sup>-1</sup> ) | 0.780                                    | 0.780                            |                           |
| F000                   | 616.0                                    | 616.0                            |                           |
| F000'                  | 617.98                                   |                                  |                           |
| h, k, lmax             | 8, 12, 22                                | 8, 12, 22                        |                           |
| Nref                   | 2617 [ 1532]                             | 2616                             |                           |
| Tmin, Tmax             | 0.823, 0.849                             | 0.829, 1.000                     |                           |
| Tmin'                  | 0.823                                    |                                  |                           |
| Correction method= #   | Reported T Limits: Tmin=0.829 Tmax=1.000 |                                  |                           |
| AbsCorr = MULTI-SCAN   |                                          |                                  |                           |
| Data completeness=     | 1.71/1.00                                | Theta(max)= 67.248               |                           |
| R(reflections)=        | 0.0448 ( 2138)                           | wR2(reflections)= 0.1290 ( 2616) |                           |
| S =                    | 1.036                                    | Npar= 192                        |                           |

---
